# Supplementary material for: Translational control of ERK signaling through miRNA/4EHP-directed silencing
Source: eLife. 2018 Feb 7;7:e35034. doi: 10.7554/eLife.35034 (PMC5819943; doi:10.7554/eLife.35034)
Supplement: Supplementary file 1. [file elife-35034-supp1.xlsx]

## Sheet: Babel
gene_name		Ensembl	rpkm (fp)WT1	num_reads (fp)WT1	rpkm (fp)WT2	num_reads (fp)WT2	rpkm (fp)KO1	num_reads (fp)KO1	rpkm (fp)KO2	num_reads (fp)KO2	rpkm (mrna)WT1	num_reads (mrna)WT1	rpkm (mrna)WT2	num_reads (mrna)WT2	rpkm (mrna)KO1	num_reads (mrna)KO1	rpkm (mrna)KO2	num_reads (mrna)KO2	translation_efficiency_WT1	translation_efficiency_WT2	translation_efficiency_KO1	translation_efficiency_KO1	calculated_translation_efficiency_WT1	calculated_translation_efficiency_WT2	calculated_translation_efficiency_KO1	calculated_translation_efficiency_KO2	avg. fp KO/wt	avg. mrna KO/wt	avg_TE_KO/WT	log_avg_TE_KO/WT	WT.vs.KO.mRNA_logFC	WT.vs.KO.mRNA_FDR	WT.vs.KO.Change_type	WT.vs.KO.P.value	WT.vs.KO.FDR	WT.vs.KO.Direction	Babel direction. 2 is not significantly changed	mRNA direction	mRNA direction. 2 is not significantly changed-FDR_0.05	Transcript_length	Five_prime_UTR_length	Three_prime_UTR_length	GC_content
uc007aff.3	Mrpl15	ENSMUST00000156816	42.4184	102	34.5067	50	24.299	64	18.8676	37	54.7261	540	54.9983	570	32.9084	462	38.2561	430	0.775104	0.627414	0.738385	0.493193	0.775104	0.627414	0.738385	0.493193	0.561152	0.648575	0.878119	-0.187511	-0.507687	0.014041	both	0.29295	0.999545	-1	2	-1	-1	4201	49	3264	0.360628
uc007afh.1	Lypla1	ENSMUST00000027036	39.9546	72	18.7109	21	18.5363	37	13.2753	20	30.5037	237	27.6141	216	9.88319	111	13.1811	118	1.30982	0.677585	1.87554	1.00715	1.30982	0.677585	1.87554	1.00715	0.542254	0.396853	1.45047	0.536523	-1.17317	1.29893e-07	both	NA	NA	-1	2	-1	-1	2433	21	1719	0.333744
uc007afn.2	Atp6v1h	ENSMUST00000044369	51.5244	208	29.7019	71	36.491	160	33.5676	109	51.1579	944	46.6711	872	41.4365	1056	41.0306	832	1.00716	0.636409	0.88065	0.818112	1.00716	0.636409	0.88065	0.818112	0.862513	0.842972	1.03358	0.0476496	-0.148531	1	translational_only	0.816441	0.999545	-1	2	-1	2	2063	227	384	0.434804
uc007afr.2	Rb1cc1	ENSMUST00000027040	4.91274	64	2.04572	16	3.25079	46	3.77423	40	2.54121	144	2.41526	140	2.25896	174	2.02213	126	1.93323	0.846997	1.43906	1.86646	1.93323	0.846997	1.43906	1.86646	1.00957	0.863738	1.18894	0.249678	-0.12864	1	translational_only	NA	NA	-1	2	-1	2	7046	450	1829	0.393415
uc007afv.2	Fam150a	ENSMUST00000133144	30.1876	31	4.9336	3	23.3598	26	25.4589	21	44.2499	208	44.1533	210	34.0424	221	41.0996	212	0.682206	0.111738	0.686198	0.619443	0.682206	0.111738	0.686198	0.619443	1.39001	0.849991	1.6445	0.717649	-0.14163	1	translational_only	0.0709225	0.93263	1	2	-1	2	858	0	474	0.384615
uc007ahi.1	Cspp1	ENSMUST00000071087	5.34387	54	3.50861	21	3.01304	33	3.20234	26	2.13973	99	2.11531	99	2.41138	154	1.81202	92	2.49745		1.24951		2.49745	1.65867	1.24951	1.76727	0.702105	0.992564	0.725864	-0.462229	0.0962539	1	translational_only	NA	NA	-1	2	1	2	4354	137	623	0.435002
uc007ahn.1	Arfgef1	ENSMUST00000088615	14.2344	222	10.606	98	9.46186	160	9.73158	122	9.39047	666	8.68311	623	6.88099	674	6.11999	477	1.51583	1.22145	1.37507	1.59013	1.51583	1.22145	1.37507	1.59013	0.772672	0.719336	1.08327	0.115387	-0.37519	0.105153	translational_only	0.966579	0.999713	1	2	-1	2	7042	176	1325	0.402016
uc007aid.1	Sulf1	ENSMUST00000088585	133.926	979	104.031	451	50.6012	402	35.9938	212	70.3409	2340	75.013	2521	31.389	1450	24.2198	890	1.90395	1.38684	1.61207	1.48613	1.90395	1.38684	1.61207	1.48613	0.363911	0.382575	0.941476	-0.0870031	-1.2769	1.2636e-12	both	0.524319	0.999545	-1	2	-1	-1	4609	466	1530	0.478412
uc007aiu.2	Lactb2	ENSMUST00000027071	15.8777	38	7.76197	11	6.16811	16	5.20183	10	13.8749	152	14.4345	160	5.22144	79	6.82107	82	1.14435	0.537739			1.14435	0.537739	1.1813	0.762612	0.480969	0.42539	1.15566	0.208715	-1.14605	5.76084e-07	both	NA	NA	-1	2	-1	-1	1887	59	961	0.306836
uc007ajm.1	Rdh10	ENSMUST00000027053	13.0139	37	11.8799	20	15.5768	48	13.1366	30	13.922	181	13.7456	181	10.6824	192	10.6435	152	0.934777	0.864271	1.45817	1.23423	0.934777	0.864271	1.45817	1.23423	1.15343	0.770793	1.49657	0.581658	-0.276862	0.522828	translational_only	0.131851	0.999545	1	2	-1	2	2295	136	1133	0.471024
uc007ajy.1	Tmem70	ENSMUST00000065373	45.3188	95	32.2249	40	33.01	75	34.4458	58	63.9712	613	67.0272	649	39.5723	523	50.0222	526	0.708425	0.480773	0.834169	0.68861	0.708425	0.480773	0.834169	0.68861	0.869907	0.683936	1.28051	0.356718	-0.452998	0.0498596	both	0.547358	0.999545	1	2	-1	-1	1729	117	850	0.326778
uc007alc.1	Mcm3	ENSMUST00000053266	100.035	684	67.4272	273	71.3048	528	60.813	334	37.8747	1181	36.1275	1137	51.1763	2192	24.9447	850	2.64121	1.86637	1.39332	2.43791	2.64121	1.86637	1.39332	2.43791	0.78894	1.02863	0.849952	-0.234546	0.134484	1	translational_only	0.141232	0.999545	-1	2	1	2	2886	5	442	0.527374
uc007amj.2	Sdhaf4	ENSMUST00000027338	12.0234	10	10.1525	5	5.54657	5	1.49685	1	34.935	133	27.8719	107	15.4579	81	20.1067	84	0.344164				0.344164	0.364255	0.358817	0.0744455	0.317617	0.566254	0.611592	-0.70936	-0.732556	0.011086	both	NA	NA	-1	2	-1	-1	667	40	312	0.449775
uc007aml.2	Fam135a	ENSMUST00000027337	3.1421	40	3.05116	23	2.68158	37	3.03163	31	4.01657	234	3.81781	225	2.87098	231	3.14335	201	0.782285	0.799191	0.934032	0.964458	0.782285	0.799191	0.934032	0.964458	0.922488	0.767684	1.20045	0.26358	-0.285875	0.457516	translational_only	0.72423	0.999545	1	2	-1	2	6467	412	1534	0.403897
uc007amt.1	Lmbrd1	ENSMUST00000095062	16.1987	73	16.114	43	17.1975	84	14.3653	52	16.4339	339	16.7794	350	14.8663	423	14.755	334	0.98569	0.960343	1.15681	0.973587	0.98569	0.960343	1.15681	0.973587	0.976794	0.891854	1.09474	0.130585	-0.0677396	1	translational_only	0.985331	0.999713	1	2	-1	2	5392	213	3565	0.390208
uc007ane.1	Phf3	ENSMUST00000088310	17.7914	304	15.5902	158	10.1885	189	12.0788	166	7.95073	620	7.64995	604	8.23002	884	5.33593	456	2.23771	2.03795	1.23796	2.26367	2.23771	2.03795	1.23796	2.26367	0.667052	0.869574	0.81897	-0.288117	-0.104515	1	translational_only	0.0764533	0.939082	-1	2	-1	2	7561	26	1457	0.426134
uc007anw.2	Rab23	ENSMUST00000088287	30.6049	60	16.367	19	13.1773	28	12.7006	20	15.1552	136	14.9781	136	9.29235	115	6.39759	63	2.01943	1.09273	1.41808		2.01943	1.09273	1.41808	1.98521	0.550922	0.520685	1.09355	0.129014	-0.829692	0.00130121	both	NA	NA	-1	2	-1	-1	4321	435	3172	0.450822
uc007any.1	Bag2	ENSMUST00000044691	43.3195	75	21.4596	22	20.7833	39	18.696	26	36.9061	292	35.6669	286	20.8313	228	21.5382	187	1.17378	0.601666	0.997696	0.868039	1.17378	0.601666	0.997696	0.868039	0.609446	0.58382	1.05086	0.0715653	-0.679374	0.000618786	both	0.982219	0.999713	-1	2	-1	-1	1815	59	1123	0.478788
uc007aor.2	Imp4	ENSMUST00000027303	54.5734	132	36.3067	52	27.4643	72	27.2795	53	64.082	707	63.2741	708	31.1297	476	37.2033	452	0.851619	0.5738	0.882254	0.733255	0.851619	0.5738	0.882254	0.733255	0.602374	0.53655	1.13336	0.180604	-0.799714	1.28345e-05	both	0.878919	0.999545	1	2	-1	-1	2249	96	1277	0.464206
uc007apl.1	Plekhb2	ENSMUST00000027297	48.2277	88	28.6914	31	30.3385	60	27.2915	40	25.2626	211	29.2273	247	13.9573	161	15.1657	139	1.90905	0.981665	2.17367	1.79955	1.90905	0.981665	2.17367	1.79955	0.749229	0.534466	1.37447	0.45888	-0.808131	0.000131882	both	NA	NA	-1	2	-1	-1	3317	113	2538	0.49382
uc007apn.2	Hs6st1	ENSMUST00000088174	28.5352	98	27.09	55	23.9887	89	31.6417	87	23.8412	368	22.2075	348	8.78208	188	11.5231	196	1.19689	1.21986	2.73155	2.74593	1.19689	1.21986	2.73155	2.74593	1.00009	0.440952	2.26647	1.18045	-1.08653	1.04529e-07	both	2.2503e-05	0.0373187	1	1	-1	-1	3719	258	2225	0.54235
uc007app.2	Uggt1	ENSMUST00000046875	36.4703	478	29.5068	229	34.9082	496	31.3322	330	16.8054	1008	16.3854	994	24.8031	2052	16.6622	1096	2.17016	1.8008	1.40742	1.88044	2.17016	1.8008	1.40742	1.88044	1.00399	1.2493	0.827974	-0.272343	0.418964	0.168025	translational_only	0.138964	0.999545	-1	2	1	2	9029	175	4198	0.482556
uc007aqg.2	Cnnm4	ENSMUST00000153128	10.5057	68	11.1996	43	10.5436	74	10.9395	57	6.61731	194	7.36649	219	5.64332	229	5.76374	186	1.58761	1.52035	1.86833	1.89799	1.58761	1.52035	1.86833	1.89799	0.98976	0.815735	1.21183	0.277185	-0.194366	1	translational_only	0.468148	0.999545	1	2	-1	2	4582	96	2170	0.525098
uc007aqj.1	Cnnm3	ENSMUST00000001166	10.0327	60	7.32819	26	7.08328	46	7.67693	37	4.04317	110	3.15441	87	2.95133	111	2.70667	81	2.4814		2.40003		2.4814	2.32316	2.40003	2.8363	0.850197	0.786097	1.08987	0.124152	-0.244714	0.951592	translational_only	NA	NA	-1	2	-1	2	5184	35	3007	0.432292
uc007aqo.2	Ankrd39	ENSMUST00000001172	9.9855	15	8.99383	8	7.37036	12	7.4589	9	19.9242	137	22.9973	160	10.425	99	7.9518	60	0.501173	0.391083			0.501173	0.391083	0.706992	0.938013	0.781337	0.428148	1.84365	0.882562	-1.11287	2.46035e-06	both	NA	NA	-1	2	-1	-1	1839	67	1220	0.421425
uc007aqx.1	Actr1b	ENSMUST00000043951	92.0437	282	54.5174	100	60.0624	200	46.4299	115	95.6324	1304	93.0019	1288	49.9457	937	62.3916	938	0.962473	0.586197	1.20255	0.74417	0.962473	0.586197	1.20255	0.74417	0.726607	0.595529	1.25703	0.330018	-0.653309	0.000725619	both	0.473769	0.999545	1	2	-1	-1	2077	72	874	0.551757
uc007ard.1	Tmem131	ENSMUST00000027290	18.8535	299	17.777	167	17.9216	308	19.1371	244	12.9449	932	14.1353	1029	14.4321	1433	14.7821	1166	1.45645	1.25763	1.24179	1.29461	1.45645	1.25763	1.24179	1.29461	1.01169	1.07881	0.934534	-0.0976809	0.205473	0.676415	translational_only	0.465999	0.999545	-1	2	1	2	6548	182	732	0.483354
uc007arp.1	Unc50	ENSMUST00000027285	36.7924	79	25.955	33	23.2035	54	24.9318	43	97.9062	961	98.071	974	57.0976	773	64.2378	691	0.375793	0.264656	0.406384	0.388117	0.375793	0.264656	0.406384	0.388117	0.767128	0.61913	1.24054	0.310966	-0.597182	0.00103147	both	0.849489	0.999545	1	2	-1	-1	1412	326	306	0.456799
uc007ash.2	Lipt1	ENSMUST00000041621	7.70543	24	4.33763	8	7.40551	25	3.59734	9	10.8718	155	12.5471	181	7.31323	144	9.39591	147	0.708756	0.345709	1.01262	0.382863	0.708756	0.345709	1.01262	0.382863	0.913626	0.713491	1.3234	0.404252	-0.396465	0.247467	translational_only	NA	NA	-1	2	-1	2	1555	121	312	0.481672
uc007asi.1	Mitd1	ENSMUST00000027257	4.84893	10	4.09441	5	3.57902	8	3.62202	6	9.11018	86	10.7835	103	9.4473	123	5.21285	54			0.378841		0.532254	0.379692	0.378841	0.694825	0.805184	0.736924	1.17734	0.235525	-0.32749	0.885071	translational_only	NA	NA	-1	2	-1	2	1229	101	378	0.400325
uc007aso.1	Eif5b	ENSMUST00000027252	25.7566	261	23.3229	141	18.7039	206	13.4206	110	9.76378	441	10.6522	485	8.07635	496	7.63134	379	2.63797	2.18949	2.31589	1.75862	2.63797	2.18949	2.31589	1.75862	0.654543	0.769384	0.844027	-0.244639	-0.286929	0.335995	translational_only	0.235053	0.999545	-1	2	-1	2	7797	280	3866	0.422855
uc007asr.1	Rev1	ENSMUST00000027251	8.91781	94	6.88745	43	4.98924	57	4.1316	35	9.92739	475	9.49394	461	7.79798	516	6.63543	350	0.898304	0.725458	0.639812	0.622658	0.898304	0.725458	0.639812	0.622658	0.577076	0.743173	0.777497	-0.36309	-0.326108	0.236012	translational_only	0.122922	0.999545	-1	2	-1	2	4262	211	301	0.46809
uc007atc.1	Pdcl3	ENSMUST00000027247	76.0599	139	52.6989	61	47.011	96	34.2496	53	91.7823	662	87.2449	639	63.6351	643	58.7642	491	0.828699	0.604034	0.738759	0.582831	0.828699	0.604034	0.738759	0.582831	0.631107	0.683691	0.922426	-0.116495	-0.404493	0.0541077	translational_only	0.38888	0.999545	-1	2	-1	2	1706	30	953	0.378664
uc007ati.1	Cnot11	ENSMUST00000161515	31.1692	132	22.7302	57	21.3504	98	17.0503	58	21.7323	421	25.7466	505	16.1734	433	19.7102	419	1.43423	0.88284	1.3201	0.865051	1.43423	0.88284	1.3201	0.865051	0.712453	0.755778	0.943066	-0.08457	-0.308656	0.36756	translational_only	0.559009	0.999545	-1	2	-1	2	3414	285	1611	0.425308
uc007atl.3	Rnf149	ENSMUST00000062525	27.0278	89	22.5657	44	13.1688	47	16.2571	43	29.5075	444	32.1943	491	11.7212	244	12.4046	205	0.915962	0.700922	1.12351	1.31057	0.915962	0.700922	1.12351	1.31057	0.593342	0.391006	1.50541	0.590157	-1.2573	1.29063e-12	both	0.13702	0.999545	1	2	-1	-1	2434	73	1176	0.436319
uc007atw.1	Il1r1	ENSMUST00000114795	7.4812	36	8.07185	23	2.3008	12	2.32981	9	5.03935	111	5.74323	128	1.34776	41	1.44801	35	1.48456	1.40545			1.48456	1.40545	1.70713	1.60897	0.29773	0.259286	1.14743	0.198411	-1.85025	5.28194e-14	both	NA	NA	-1	2	-1	-1	4808	302	2784	0.450499
uc007ava.2	Mrps9	ENSMUST00000057208	16.5697	54	13.9914	27	17.2695	61	12.6063	33	37.6738	562	39.6849	599	35.4812	731	37.5692	615	0.43982	0.352562	0.486722	0.335549	0.43982	0.352562	0.486722	0.335549	0.977577	0.944307	1.03772	0.0534186	0.0143928	1	translational_only	0.635462	0.999545	-1	2	1	2	1419	59	187	0.496829
uc007avf.1	Tgfbrap1	ENSMUST00000095014	8.83027	64	8.15527	35	5.98303	47	5.32487	31	5.24886	174	5.57074	187	3.01185	138	3.46099	126	1.68232	1.46395	1.98649	1.53854	1.68232	1.46395	1.98649	1.53854	0.665737	0.598251	1.12039	0.163996	-0.647464	0.00483424	both	NA	NA	-1	2	-1	-1	5538	565	2390	0.507584
uc007avq.1	Uxs1	ENSMUST00000126008	17.3748	58	13.2768	27	8.5247	31	10.3028	28	21.0613	273	21.9704	287	26.8518	437	16.9418	247	0.824963	0.604306	0.317472	0.608128	0.824963	0.604306	0.317472	0.608128	0.61424	1.01771	0.647603	-0.626817	0.0629656	1	translational_only	0.0156238	0.605204	-1	-1	1	2	1263	0	0	0.488519
uc007avs.2	Tpp2	ENSMUST00000087933	30.583	326	21.2297	134	24.1488	279	17.4021	149	15.7442	768	15.155	748	15.3564	1034	13.4694	721	1.94249	1.40083	1.57256	1.29197	1.94249	1.40083	1.57256	1.29197	0.801945	0.932896	0.856791	-0.222984	-0.00192503	1	translational_only	0.271669	0.999545	-1	2	-1	2	4691	95	807	0.411
uc007avz.2	Tex30	ENSMUST00000027215	21.0473	39	10.9035	12	16.9035	34	15.4295	23	33.8891	287	34.8935	299	38.0018	437	36.4337	336	0.621064	0.312479	0.444808	0.423494	0.621064	0.312479	0.444808	0.423494	1.01196	1.08219	0.930115	-0.10452	0.194307	0.89554	translational_only	0.466292	0.999545	-1	2	1	2	1265	314	273	0.383399
uc007awb.1	Kdelc1	ENSMUST00000065767	19.2422	81	13.6403	34	21.4796	98	15.9705	54	28.8035	555	31.6983	618	38.1432	1013	33.3173	704	0.668051	0.430318	0.56313	0.479344	0.668051	0.430318	0.56313	0.479344	1.1389	1.18113	0.949111	-0.0753512	0.337245	0.18296	translational_only	0.4686	0.999545	-1	2	1	2	2324	274	541	0.427281
uc007awf.2	Bivm	ENSMUST00000114709	7.60187	32	4.01187	10	3.72605	17	4.14049	14	6.0202	116	4.51368	88	3.23169	86	4.01999	85	1.26273				1.26273	0.888825	1.15297	1.02998	0.677348	0.688415	1.01459	0.0209004	-0.448865	0.278184	translational_only	NA	NA	-1	2	-1	2	3571	433	1629	0.41865
uc007awi.2	Ercc5	ENSMUST00000027214	7.28839	72	6.8381	40	3.45565	37	3.15059	25	4.99793	226	5.53123	253	3.0281	189	2.09649	104	1.45828	1.23627	1.14119	1.5028	1.45828	1.23627	1.14119	1.5028	0.46765	0.486704	0.981235	-0.0273288	-0.930718	6.86563e-05	both	NA	NA	-1	2	-1	-1	4010	319	178	0.482544
uc007awm.2	Gulp1	ENSMUST00000074525	47.0525	119	20.7002	31	27.3606	75	18.2134	37	31.9968	370	27.5204	322	11.9462	191	15.9009	202	1.47054	0.752174	2.29032	1.14543	1.47054	0.752174	2.29032	1.14543	0.672653	0.467884	1.54575	0.628303	-1.00312	3.57052e-06	both	0.0502647	0.91539	1	2	-1	-1	2976	246	1815	0.350806
uc007awq.2	Col3a1	ENSMUST00000087883	320.903	3969	342.859	2511	78.8492	1057	67.3091	669	288.897	16191	281.832	16052	60.8355	4736	64.2133	3982	1.11079	1.21654	1.2961	1.04821	1.11079	1.21654	1.2961	1.04821	0.220197	0.219104	1.0073	0.0104924	-2.0859	4.75746e-44	both	0.721677	0.999545	-1	2	-1	-1	5564	210	959	0.524982
uc007awr.1	Col5a2	ENSMUST00000086430	289.54	3663	343.659	2575	317.535	4355	337.437	3429	313.97	18015	321.176	18659	331.178	26090	347.494	21850	0.922189	1.07	0.958803	0.971058	0.922189	1.07	0.958803	0.971058	1.03439	1.06853	0.968713	-0.0458582	0.187588	0.729081	translational_only	0.559394	0.999545	-1	2	1	2	6615	368	1753	0.496599
uc007awt.1	Wdr75	ENSMUST00000027139	21.5307	146	13.8716	57	15.2793	113	11.8939	66	17.706	509	17.0834	494	18.6562	704	14.6324	467	1.21601	0.811991	0.818991	0.812847	1.21601	0.811991	0.818991	0.812847	0.767555	0.95686	0.804653	-0.313561	0.00721919	1	translational_only	0.190392	0.999545	-1	2	1	2	2612	21	98	0.437213
uc007axc.1	Slc39a10	ENSMUST00000027131	17.3166	121	15.4492	64	11.6715	88	11.5809	65	8.38294	264	10.4004	331	6.92619	301	7.6001	262	2.06569	1.48544	1.68513	1.52378	2.06569	1.48544	1.68513	1.52378	0.709656	0.773359	0.903631	-0.146194	-0.275851	0.541846	translational_only	0.416408	0.999545	-1	2	-1	2	4961	50	2409	0.419673
uc007axj.1	Tmeff2	ENSMUST00000081851	5.44318	17	4.32584	8	12.7029	43	10.3641	26	10.4225	149	12.513	181	20.7658	410	22.7566	357	0.522252	0.345709	0.61172	0.455431	0.522252	0.345709	0.61172	0.455431	2.36123	1.8976	1.22949	0.298064	1.01994	1.76384e-07	both	NA	NA	-1	2	1	1	3339	425	1789	0.427373
uc007axk.1	Sdpr	ENSMUST00000051572	199.337	697	155.037	321	115.837	439	107.882	303	86.4166	1382	92.403	1494	72.0923	1591	45.4922	799	2.3067	1.67784	1.60679	2.37145	2.3067	1.67784	1.60679	2.37145	0.631309	0.657559	0.99842	-0.00228101	-0.504524	0.0845092	translational_only	0.668742	0.999545	-1	2	-1	2	3055	260	1538	0.443535
uc007ayb.2	Stat1	ENSMUST00000070968	8.56361	54	6.96326	26	5.12106	35	5.13322	26	5.37969	155	6.06602	177	1.73402	69	2.4626	78	1.59184	1.14791			1.59184	1.14791	2.9533	2.08447	0.660422	0.366654	1.83877	0.87874	-1.36243	1.16132e-08	both	NA	NA	-1	2	-1	-1	5153	335	2568	0.429653
uc007aye.2	Gls	ENSMUST00000114513	48.2027	273	42.9601	144	40.6246	249	24.3876	111	22.8225	589	24.0132	628	19.1172	679	19.1639	543	2.11207	1.78902	2.12503	1.27258	2.11207	1.78902	2.12503	1.27258	0.713143	0.817348	0.870938	-0.199357	-0.196533	0.78133	translational_only	0.285703	0.999545	-1	2	-1	2	4973	240	2708	0.409411
uc007ayh.2	Nab1	ENSMUST00000069792	15.4019	61	20.3367	48	4.81978	21	4.66181	15	15.4205	252	12.7105	214	5.31739	128	3.62592	71	0.998799	1.59999	0.906418		0.998799	1.59999	0.906418	1.28569	0.265304	0.317918	0.843511	-0.245522	-1.44754	4.14554e-10	both	NA	NA	-1	2	-1	-1	5088	258	3369	0.386792
uc007azj.2	Stk17b	ENSMUST00000027263	13.1994	41	7.61158	14	17.5248	59	10.4207	26	8.01786	114	7.99367	115	5.75978	113	7.81927	122	1.64625	0.952201	3.04261	1.3327	1.64625	0.952201	3.04261	1.3327	1.34282	0.848079	1.68381	0.751731	-0.150923	1	translational_only	NA	NA	-1	2	-1	2	3278	183	1976	0.384686
uc007azx.2	Sf3b1	ENSMUST00000027127	72.5429	794	50.7729	330	59.4743	705	47.5481	419	38.9938	1891	42.2657	2080	48.2027	3206	37.6338	2007	1.86037	1.20128	1.23384	1.26344	1.86037	1.20128	1.23384	1.26344	0.867873	1.05632	0.815666	-0.29395	0.171301	1	translational_only	0.175701	0.999545	-1	2	1	2	6191	112	2164	0.416734
uc007bad.1	Mob4	ENSMUST00000162364	43.1486	78	24.6454	27	22.5096	45	20.1869	30	51.1911	409	43.0535	352	26.9224	299	32.9004	295	0.842894	0.572436	0.836091	0.613576	0.842894	0.572436	0.836091	0.613576	0.629797	0.634761	1.02426	0.0345842	-0.547696	0.0198069	both	0.780882	0.999545	-1	2	-1	-1	2826	55	2093	0.343241
uc007bag.1	Rftn2	ENSMUST00000027121	3.10076	13	2.01405	5	2.42073	11	2.96947	10	4.11656	79	3.55346	69	5.28219	140	3.56381	75			0.458282		0.75324	0.566786	0.458282	0.833227	1.05384	1.15332	0.978396	-0.031509	0.314598	0.837111	translational_only	NA	NA	-1	2	1	2	3676	523	1650	0.431991
uc007baj.1	Mars2	ENSMUST00000061334	8.12613	40	5.48934	16	6.37282	34	9.35791	37	8.65449	195	8.42176	192	6.0736	189	6.2689	155	0.93895	0.651805	1.04927	1.49275	0.93895	0.651805	1.04927	1.49275	1.15536	0.722788	1.59799	0.676263	-0.371486	0.191657	translational_only	0.10623	0.99556	1	2	-1	2	2882	63	1058	0.473629
uc007bas.1	Satb2	ENSMUST00000114415	16.0455	99	13.9593	51	4.78516	32	4.64086	23	5.06565	143	4.44425	127	1.769	69	2.0328	63	3.1675	3.14098			3.1675	3.14098	2.70501	2.283	0.314151	0.399772	0.790682	-0.33883	-1.23001	1.57935e-07	both	NA	NA	-1	2	-1	-1	5286	282	2802	0.452705
uc007bba.2	Tyw5	ENSMUST00000162686	8.39817	22	4.50783	7	6.70631	19	5.22767	11	17.4929	205	17.4522	209	13.8864	225	13.0264	169	0.480091	0.258296	0.482943	0.401313	0.480091	0.258296	0.482943	0.401313	0.924684	0.770144	1.19755	0.260088	-0.277397	0.508751	translational_only	0.890346	0.999545	1	2	-1	2	1413	213	252	0.423921
uc007bbc.2	9430016H08Rik	ENSMUST00000027114	21.4986	52	13.9641	20	21.3611	56	11.3236	22	41.7284	462	37.5809	421	24.9168	381	31.6063	384	0.515203	0.371575	0.857297	0.358269	0.515203	0.371575	0.857297	0.358269	0.921663	0.712693	1.37077	0.454983	-0.394848	0.147809	translational_only	0.548702	0.999545	1	2	-1	2	1325	225	224	0.504151
uc007bbe.2	Spats2l	ENSMUST00000167085	7.69844	36	11.1954	31	1.57841	8	3.19474	12	8.41431	180	8.44946	183	2.7738	82	2.51182	59	0.914923	1.32498			0.914923	1.32498	0.569042	1.27188	0.25263	0.31343	0.821877	-0.283005	-1.56876	9.90235e-14	both	NA	NA	-1	2	-1	-1	3743	135	1934	0.459524
uc007bbk.2	Sgol2a	ENSMUST00000027202	6.26823	61	5.01071	29	4.35104	46	3.31075	26	4.0862	178	4.26772	189	3.00982	180	2.74831	132	1.534	1.1741	1.44562	1.20465	1.534	1.1741	1.44562	1.20465	0.6793	0.689272	0.978645	-0.0311418	-0.440706	0.0863223	translational_only	NA	NA	-1	2	-1	2	5314	341	1478	0.384268
uc007bbr.1	Bzw1	ENSMUST00000050552	22.563	57	8.71483	16	13.771	41	9.84324	24	16.5572	131	13.0364	110	15.294	157	11.3899	112	1.36273		0.90042	0.864206	1.36273	0.6685	0.90042	0.864206	0.754985	0.901681	0.868747	-0.202992	-0.0506427	1	translational_only	NA	NA	-1	2	-1	2	2833	91	1482	0.406636
uc007bbs.2	Clk1	ENSMUST00000156931	15.3906	62	11.2793	27	11.8762	52	10.1627	33	22.1433	400	23.0221	422	23.6161	582	16.9867	336	0.695045	0.489932	0.502886	0.598273	0.695045	0.489932	0.502886	0.598273	0.826359	0.898979	0.929266	-0.105836	-0.0656782	1	translational_only	0.416544	0.999545	-1	2	-1	2	1830	169	209	0.410929
uc007bbx.2	Ppil3	ENSMUST00000081677	27.3667	36	20.5408	16	16.9057	24	15.175	16	41.0519	244	43.045	260	27.1591	221	24.531	160	0.666637	0.477192	0.622469	0.618604	0.666637	0.477192	0.622469	0.618604	0.669638	0.614649	1.08502	0.117715	-0.611049	0.00353892	both	0.934778	0.999545	-1	2	-1	-1	900	203	211	0.452222
uc007bcb.1	Nif3l1	ENSMUST00000087521	24.5212	77	11.8318	22	14.3971	49	15.4621	39	25.8344	371	29.0849	423	17.2436	342	20.2244	319	0.949167	0.4068	0.834924	0.764525	0.949167	0.4068	0.834924	0.764525	0.82137	0.682238	1.17956	0.238253	-0.45656	0.0488122	both	0.642307	0.999545	1	2	-1	-1	2105	23	951	0.446081
uc007bct.1	Casp8	ENSMUST00000027189	17.7997	71	13.4812	32	8.06703	35	6.51274	21	18.789	327	18.1908	322	12.4348	304	9.50992	185	0.947345	0.741102	0.648746	0.684836	0.947345	0.741102	0.648746	0.684836	0.466091	0.593425	0.789827	-0.340391	-0.627489	0.00499204	both	0.138283	0.999545	-1	2	-1	-1	2412	220	749	0.395522
uc007bcv.2	Trak2	ENSMUST00000027186	14.9507	115	13.1635	60	10.6675	89	10.0274	62	9.60689	338	9.24521	329	6.39566	311	5.02113	194	1.55625	1.42382	1.66793	1.99705	1.55625	1.42382	1.66793	1.99705	0.736102	0.605597	1.22983	0.29846	-0.619136	0.00502921	both	0.461041	0.999545	1	2	-1	-1	6240	444	3054	0.475962
uc007bde.1	Tmem237	ENSMUST00000094917	12.1593	42	7.33373	15	5.87637	22	7.56885	21	20.492	324	20.7526	332	11.4488	250	16.1381	280	0.593365	0.353388	0.513276	0.469007	0.593365	0.353388	0.513276	0.469007	0.689747	0.668857	1.03753	0.0531509	-0.48858	0.075271	translational_only	0.775687	0.999545	-1	2	-1	2	1868	82	544	0.447537
uc007bdm.2	Als2	ENSMUST00000027178	6.16005	86	5.68539	47	5.41912	82	5.08293	57	3.38142	216	2.79925	181	2.81052	248	2.3106	162	1.82174	2.03104	1.92816	2.19983	1.82174	2.03104	1.92816	2.19983	0.88659	0.82857	1.07143	0.0995414	-0.169126	1	translational_only	0.918327	0.999545	1	2	-1	2	6512	135	1421	0.502611
uc007bdy.1	Nop58	ENSMUST00000191142	110.771	497	63.8265	170	78.6594	383	57.6784	208	36.8062	754	35.1997	731	51.2561	1441	25.7843	580	3.00958	1.81327	1.53464	2.23695	3.00958	1.81327	1.53464	2.23695	0.780868	1.06992	0.782025	-0.354713	0.190208	1	translational_only	0.0778336	0.939082	-1	2	1	2	1976	176	189	0.412449
uc007bej.1	Nbeal1	ENSMUST00000160834	3.73433	85	4.60003	62	3.24274	80	2.18779	40	2.1214	221	2.09635	221	1.68915	243	1.4519	166	1.76031	2.19431	1.91975	1.50685	1.76031	2.19431	1.91975	1.50685	0.651584	0.744723	0.866478	-0.206765	-0.323241	0.330108	translational_only	0.299547	0.999545	-1	2	-1	2	12108	328	3713	0.362488
uc007ben.2	Cyp20a1	ENSMUST00000060608	46.253	179	34.4739	79	36.9528	155	30.5607	95	28.9804	513	32.5262	583	25.4014	621	21.9306	426	1.59601	1.05988	1.45476	1.39352	1.59601	1.05988	1.45476	1.39352	0.836321	0.769542	1.07244	0.100896	-0.278468	0.40647	translational_only	0.930608	0.999545	1	2	-1	2	2246	86	771	0.380232
uc007bep.2	Abi2	ENSMUST00000188618	16.2127	66	14.0755	34	10.4111	46	10.3691	34	8.39515	156	8.89449	167	5.30302	136	5.23641	107	1.9312	1.58249	1.96324	1.98018	1.9312	1.58249	1.96324	1.98018	0.68608	0.609581	1.1223	0.166458	-0.613377	0.00902561	both	NA	NA	-1	2	-1	-1	4804	184	3156	0.409867
uc007bet.2	Raph1	ENSMUST00000140485	9.54864	102	6.47845	41	7.59868	88	8.85041	76	6.30238	308	5.60776	277	4.59297	310	5.76037	309	1.51508	1.15527	1.65441	1.53643	1.51508	1.15527	1.65441	1.53643	1.02633	0.869288	1.19492	0.256909	-0.107877	1	translational_only	0.525117	0.999545	1	2	-1	2	9117	201	5115	0.412965
uc007bfl.1	Nrp2	ENSMUST00000075144	38.7243	304	41.7338	194	53.2399	453	52.809	333	16.9164	607	19.1218	695	24.2874	1201	21.6788	853	2.28916	2.18252	2.19208	2.43598	2.28916	2.18252	2.19208	2.43598	1.31806	1.27549	1.03497	0.0495875	0.446902	0.0323204	both	0.973479	0.999713	-1	2	1	1	6739	888	3055	0.492803
uc007bfv.2	Ndufs1	ENSMUST00000027111	31.3775	192	25.1151	91	20.3554	135	16.2765	80	19.2794	540	19.5481	554	25.9803	1005	19.2875	592	1.62751	1.28478	0.783495	0.843885	1.62751	1.28478	0.783495	0.843885	0.648437	1.16587	0.558796	-0.839607	0.320529	0.354291	translational_only	0.0010963	0.256785	-1	-1	1	2	2823	400	239	0.459086
uc007bfz.2	Eef1b2	ENSMUST00000129339	864.649	1179	543.378	507	540.804	849	441.726	535	1711.4	8931	1728.27	9171	1419.14	10152	997.214	5824	0.50523	0.314405	0.381078	0.44296	0.50523	0.314405	0.381078	0.44296	0.697806	0.702496	1.00537	0.00773051	-0.409341	0.116573	translational_only	0.626667	0.999545	-1	2	-1	2	1933	381	874	0.424211
uc007bgl.2	Fastkd2	ENSMUST00000027103	4.83047	28	3.49614	12	5.25516	33	4.51028	21	15.0756	400	16.7991	451	13.2899	487	13.2573	386	0.320417	0.208115	0.395426	0.340212	0.320417	0.208115	0.395426	0.340212	1.1728	0.832861	1.39185	0.477006	-0.16585	1	translational_only	0.6356	0.999545	1	2	-1	2	3205	154	981	0.425273
uc007bgo.2	Klf7	ENSMUST00000114086	29.1907	73	17.6176	26	17.0095	46	16.0209	32	16.7379	189	16.5045	189	9.83345	153	10.3278	129	1.74398	1.06745	1.72976	1.55124	1.74398	1.06745	1.72976	1.55124	0.705654	0.606494	1.16702	0.222829	-0.62279	0.00533497	both	NA	NA	-1	2	-1	-1	1336	388	42	0.505988
uc007bgr.1	Creb1	ENSMUST00000087366	26.5646	75	17.2602	29	18.5899	57	16.6562	38	11.0433	141	9.46334	123	7.80219	138	6.41682	91	2.4055	1.82391	2.38265	2.59571	2.4055	1.82391	2.38265	2.59571	0.804249	0.693386	1.17708	0.235216	-0.417121	0.202494	translational_only	NA	NA	-1	2	-1	2	8421	225	7170	0.380834
uc007bgu.1	Mettl21a	ENSMUST00000053469	10.0043	18	11.2635	12	10.7687	21	6.91941	10	14.2288	117	12.7404	106	6.418	73	10.4175	94	0.703106				0.703106	0.884078	1.67789	0.664212	0.831685	0.624249	1.47564	0.561338	-0.596741	0.100548	translational_only	NA	NA	-1	2	-1	2	2666	749	1260	0.424981
uc007bgy.1	Fzd5	ENSMUST00000063982	27.001	131	31.2548	90	26.4488	139	31.9636	125	17.2636	374	20.48	450	11.0081	327	11.0738	262	1.56404	1.52611	2.40267	2.88642	1.56404	1.52611	2.40267	2.88642	1.00269	0.585049	1.7116	0.775342	-0.68571	0.000539817	both	0.00428719	0.412376	1	1	-1	-1	6914	871	4285	0.523865
uc007bhn.2	Idh1	ENSMUST00000097709	52.6901	182	36.1797	74	22.4187	84	11.5052	32	44.9307	704	43.0455	683	17.7452	384	17.7524	307	1.1727	0.840501	1.26337	0.648095	1.1727	0.840501	1.26337	0.648095	0.381726	0.40349	0.949467	-0.0748102	-1.20812	5.54913e-13	both	0.525605	0.999545	-1	2	-1	-1	2263	169	849	0.433053
uc007bhz.2	Map2	ENSMUST00000114013	13.1927	204	8.95558	82	5.42968	91	4.42812	55	5.08708	360	4.88797	350	2.59883	254	2.18911	170	2.59338	1.83217	2.08928	2.0228	2.59338	1.83217	2.08928	2.0228	0.445082	0.479992	0.929168	-0.105988	-0.956337	6.3726e-07	both	0.497355	0.999545	-1	2	-1	-1	9648	585	3576	0.437293
uc007bil.2	Rpe	ENSMUST00000027157	45.6454	86	21.5123	24	20.0776	41	25.1094	38	34.3221	296	33.0538	288	21.9969	262	19.8652	188	1.32992	0.650826	0.912748	1.26399	1.32992	0.650826	0.912748	1.26399	0.672849	0.621321	1.09895	0.136127	-0.584906	0.00500195	both	0.920101	0.999545	1	2	-1	-1	2692	76	1929	0.390416
uc007bim.2	Kansl1l	ENSMUST00000068168	5.20928	42	1.04731	5	1.83095	16	0.926473	6	2.84512	105	1.76746	66	1.39348	71	1.25931	51	1.83095				1.83095	0.592549	1.31395	0.735697	0.440724	0.575121	0.845736	-0.241721	-0.696053	0.0586901	translational_only	NA	NA	-1	2	-1	2	4655	251	1533	0.413319
uc007biw.2	Lancl1	ENSMUST00000113979	14.991	50	8.10132	16	11.8948	43	10.8246	29	32.2916	493	30.3863	469	25.7269	542	27.9345	468	0.464238	0.266611	0.462348	0.387498	0.464238	0.266611	0.462348	0.387498	0.983851	0.856146	1.16282	0.21763	-0.127816	1	translational_only	0.989973	0.999713	1	2	-1	2	4461	297	2964	0.466711
uc007bjm.2	Bard1	ENSMUST00000027393	16.0322	103	9.9713	38	7.59462	53	4.83599	25	6.20251	182	6.34061	189	3.07906	125	2.53765	82	2.58479	1.57261	2.46654		2.58479	1.57261	2.46654	1.90569	0.478036	0.447792	1.05167	0.0726877	-1.05174	8.64612e-07	both	NA	NA	-1	2	-1	-1	5448	165	2985	0.419971
uc007bjt.2	Atic	ENSMUST00000027384	101.771	469	68.0843	194	82.6324	414	64.5861	247	70.1753	1324	68.5225	1309	51.899	1305	49.2897	1045	1.45024	0.993605	1.59218	1.31034	1.45024	0.993605	1.59218	1.31034	0.866728	0.729563	1.18768	0.248149	-0.366946	0.0749724	translational_only	0.468555	0.999545	1	2	-1	2	2611	100	732	0.509383
uc007bki.2	Pecr	ENSMUST00000027381	11.1085	28	5.35996	8	7.68677	21	4.4452	9	10.4006	120	13.7054	160	7.46798	119	7.58232	96	1.06806	0.391083	1.0293		1.06806	0.391083	1.0293	0.586258	0.736681	0.624337	1.1072	0.146913	-0.581567	0.0366514	both	NA	NA	-1	2	-1	-1	1185	98	175	0.504641
uc007bkl.2	Xrcc5	ENSMUST00000027379	20.6119	127	7.4004	27	7.48711	50	5.05136	25	8.29686	234	6.83325	195	4.56979	178	4.32968	134	2.48431	1.083	1.63839	1.16668	2.48431	1.083	1.63839	1.16668	0.447605	0.588196	0.78633	-0.346794	-0.666167	0.00381294	both	NA	NA	-1	2	-1	-1	2556	126	231	0.455399
uc007bks.2	Smarcal1	ENSMUST00000047615	7.8205	60	5.94324	27	6.2534	52	3.56993	22	11.2803	396	11.9368	424	6.56133	318	6.56507	253	0.693287	0.497893	0.953068	0.543776	0.693287	0.497893	0.953068	0.543776	0.71371	0.565376	1.25661	0.329532	-0.724687	9.40488e-05	both	0.610242	0.999545	1	2	-1	-1	6715	246	3736	0.422785
uc007bkw.2	Igfbp2	ENSMUST00000047328	0.394077	1	0.665514	1	6.55189	18	10.3028	21	1.37901	16	1.70362	20	18.5747	291	22.5163	279			0.352731	0.457569	0.285768	0.390647	0.352731	0.457569	15.9067	13.3298	1.19793	0.260549	3.78527	6.43274e-47	both	NA	NA	-1	2	1	1	1327	100	309	0.577995
uc007blo.1	Arpc2	ENSMUST00000113820	190.837	413	109.456	152	102.949	256	75.8931	144	357.517	2912	372.837	3102	183.498	2097	178.245	1735	0.533784	0.293575	0.561035	0.42578	0.533784	0.293575	0.561035	0.42578	0.595559	0.495299	1.19273	0.254266	-0.849978	8.03863e-08	both	0.779902	0.999545	1	2	-1	-1	1597	276	418	0.448341
uc007blv.2	Tmbim1	ENSMUST00000016309	95.6631	246	77.4939	118	53.4595	149	45.5083	94	98.4721	1154	100.22	1191	42.1376	682	49.7574	642	0.971474	0.773236	1.26869	0.914603	0.971474	0.773236	1.26869	0.914603	0.571549	0.462499	1.25138	0.323517	-1.01558	3.27753e-09	both	0.491996	0.999545	1	2	-1	-1	2309	254	1125	0.519272
uc007blz.2	Ctdsp1	ENSMUST00000027367	28.4653	55	23.0918	27	13.0829	28	12.3617	20	51.3726	310	56.4196	326	14.1005	145	18.3998	154	0.554094	0.409287	0.927835	0.671835	0.554094	0.409287	0.927835	0.671835	0.493523	0.301509	1.66047	0.731595	-1.27596	4.23755e-10	both	NA	NA	-1	2	-1	-1	2776	289	1701	0.502882
uc007bmd.2	Usp37	ENSMUST00000044260	9.44569	78	4.90825	24	5.36302	48	5.42744	36	3.25407	123	2.87614	110	2.93083	153	2.5564	106	2.90273	1.70654	1.82986	2.12308	2.90273	1.70654	1.82986	2.12308	0.751742	0.895115	0.857605	-0.221614	-0.0573998	1	translational_only	NA	NA	-1	2	-1	2	7196	375	3881	0.426626
uc007bmf.2	Rqcd1	ENSMUST00000087215	61.1263	152	39.3902	58	32.2799	87	23.5307	47	63.8707	727	60.5194	697	31.4606	494	37.7887	472	0.957032	0.650869	1.02604	0.622692	0.957032	0.650869	1.02604	0.622692	0.555239	0.55671	1.0254	0.0361824	-0.750745	6.10563e-05	both	0.780256	0.999545	-1	2	-1	-1	3266	378	1988	0.487446
uc007bmy.1	Ttll4	ENSMUST00000042125	11.4156	115	9.05255	54	13.0968	143	13.3468	108	7.26897	335	6.62459	309	7.03461	448	6.58268	333	1.57046	1.36651	1.86177	2.02757	1.57046	1.36651	1.86177	2.02757	1.29194	0.980115	1.32427	0.405199	0.0700533	1	translational_only	0.218821	0.999545	1	2	1	2	4253	397	274	0.514225
uc007bnf.2	Wnt10a	ENSMUST00000006718	0.286688	1	0	0	2.64508	10	3.92605	11	0.564141	9	0.247799	4	5.99097	132	8.04757	141			0.441511	0.487856	0.508185	0	0.441511	0.487856	22.9209	17.2901	1.8288	0.870895	4.18087	4.57371e-31	both	NA	NA	-1	2	1	1	1961	152	555	0.613463
uc007bnq.1	Cnppd1	ENSMUST00000168720	18.8056	64	10.9171	22	11.3864	42	13.1693	36	25.2922	394	26.6048	419	13.1648	283	17.1985	294	0.743534	0.410342	0.864908	0.765725	0.743534	0.410342	0.864908	0.765725	0.82616	0.585069	1.41318	0.498944	-0.680299	0.0016517	both	0.274279	0.999545	1	2	-1	-1	2930	522	1184	0.534471
uc007bnt.1	Fam134a	ENSMUST00000097694	27.5473	125	28.6395	77	10.7697	53	20.2901	74	31.2656	649	29.5671	621	14.485	415	14.4783	330	0.881073	0.968626	0.743504	1.40141	0.881073	0.968626	0.743504	1.40141	0.552795	0.476115	1.1596	0.213629	-0.972918	1.35586e-08	both	0.990036	0.999713	-1	2	-1	-1	2557	77	854	0.527962
uc007bnx.2	Abcb6	ENSMUST00000027396	7.32907	52	5.71259	24	9.10275	70	10.5281	60	14.0772	457	14.6984	483	15.3065	686	18.0848	644	0.520632	0.388654	0.594697	0.582152	0.520632	0.388654	0.594697	0.582152	1.50524	1.1604	1.29426	0.372124	0.309554	0.2769	translational_only	0.677662	0.999545	1	2	1	2	3042	274	239	0.554898
uc007boh.2	Stk16	ENSMUST00000027401	22.0179	55	18.8657	28	11.3091	31	16.4841	33	76.3713	716	67.3248	651	36.5832	492	37.7033	412	0.2883	0.280219	0.309133	0.437205	0.2883	0.280219	0.309133	0.437205	0.679811	0.516969	1.31277	0.392618	-0.797034	8.28597e-06	both	0.84607	0.999545	1	2	-1	-1	2885	313	1654	0.524783
uc007bok.2	Tuba4a	ENSMUST00000186213	14.4537	46	9.57969	19	23.4028	78	16.8957	43	25.2427	253	22.5583	240	38.3344	423	37.7151	358	0.572589	0.424664	0.610489	0.447983	0.572589	0.424664	0.610489	0.447983	1.67677	1.59096	1.06139	0.0859525	0.46394	0.034057	both	0.597245	0.999545	1	2	1	1	2096	99	650	0.533874
uc007bon.2	Dnajb2	ENSMUST00000188931	8.15169	22	10.012	16	6.49542	19	7.842	17	15.2992	189	14.4804	181	8.44011	144	8.99954	122	0.532817	0.691417	0.76959	0.871379	0.532817	0.691417	0.76959	0.871379	0.789345	0.585623	1.3404	0.422668	-0.676188	0.0022418	both	NA	NA	-1	2	-1	-1	3053	199	1879	0.555847
uc007boq.1	Ptprn	ENSMUST00000027404	8.94291	74	5.30818	26	3.67951	33	3.15951	21	9.71596	367	10.3244	395	4.23198	221	4.16653	173	0.920436	0.514139	0.869455	0.758307	0.920436	0.514139	0.869455	0.758307	0.479895	0.41908	1.13467	0.182267	-1.15469	1.66062e-10	both	0.79188	0.999545	1	2	-1	-1	3535	81	508	0.580481
uc007boz.1	Speg	ENSMUST00000087122	7.23765	200	7.6393	125	4.641	139	4.91075	109	7.81181	988	7.72052	988	3.62926	634	5.02925	698	0.926501	0.989481	1.27877	0.976437	0.926501	0.989481	1.27877	0.976437	0.64205	0.55745	1.17705	0.235179	-0.748221	0.000391597	both	0.692258	0.999545	1	2	-1	-1	10787	143	855	0.624548
uc007bpd.1	Gmppa	ENSMUST00000037796	28.4611	100	16.3421	34	13.1296	50	11.6928	33	41.5969	669	43.4459	707	20.546	456	25.1577	444	0.684213	0.376147	0.639034	0.464781	0.684213	0.376147	0.639034	0.464781	0.554032	0.53742	1.04098	0.0579439	-0.801457	1.90077e-05	both	0.825396	0.999545	-1	2	-1	-1	1528	90	175	0.572644
uc007bpj.2	Chpf	ENSMUST00000094818	74.717	487	94.0532	363	34.9636	247	33.8078	177	96.7739	2886	108.88	3284	37.439	1542	42.4562	1390	0.772078	0.863823	0.933883	0.796299	0.772078	0.863823	0.933883	0.796299	0.407486	0.388493	1.05763	0.0808376	-1.26599	8.98789e-15	both	0.849547	0.999545	-1	2	-1	-1	3092	366	401	0.644567
uc007bpn.2	Obsl1	ENSMUST00000113567	25.8489	394	20.0577	181	15.4958	256	12.8138	157	29.1696	2028	27.8957	1962	12.5493	1207	13.6845	1045	0.886158	0.719025	1.23479	0.936373	0.886158	0.719025	1.23479	0.936373	0.616678	0.459715	1.3526	0.435732	-1.02237	2.06322e-10	both	0.304693	0.999545	1	2	-1	-1	5770	228	127	0.625477
uc007bpt.2	Stk11ip	ENSMUST00000027414	3.64875	33	2.05592	11	1.93766	19	2.8898	21	4.1828	173	4.18302	175	2.58934	148	2.64396	120	0.872323	0.491493	0.748322	1.09298	0.872323	0.491493	0.748322	1.09298	0.846228	0.625557	1.35011	0.433077	-0.578702	0.0121134	both	NA	NA	-1	2	-1	-1	4458	139	1100	0.534769
uc007bpv.2	Slc4a3	ENSMUST00000124341	2.80009	29	2.77203	17	1.06902	12	0.601359	5	6.4071	302	6.13434	292	1.79877	117	2.16832	112	0.437029	0.451888	0.594302		0.437029	0.451888	0.594302	0.277339	0.299773	0.316318	0.980567	-0.0283124	-1.56933	1.15295e-15	both	NA	NA	-1	2	-1	-1	4441	216	541	0.591533
uc007bqo.2	Acsl3	ENSMUST00000035779	19.4822	118	11.7052	42	9.59679	63	10.2773	50	9.63504	267	10.048	282	9.96906	381	7.37308	224	2.02202	1.16493	0.962657	1.3939	2.02202	1.16493	0.962657	1.3939	0.637247	0.88107	0.73944	-0.435495	-0.0820609	1	translational_only	0.0549686	0.928935	-1	2	-1	2	3950	459	1328	0.422025
uc007bqu.2	Wdfy1	ENSMUST00000113512	5.62029	19	5.98962	12	13.6004	50	15.3514	42	7.77563	117	8.05805	123	14.8526	306	12.4962	209	0.722808	0.743309	0.915694	1.22849	0.722808	0.743309	0.915694	1.22849	2.49372	1.72726	1.46249	0.548426	0.888973	2.84071e-05	both	NA	NA	-1	2	1	1	4551	69	3249	0.439464
uc007bqy.1	Mrpl44	ENSMUST00000027464	13.3323	37	13.9961	23	11.3035	34	6.28037	14	23.3012	296	23.4957	302	16.9286	297	17.5037	244	0.572173	0.595689	0.667714	0.358803	0.572173	0.595689	0.667714	0.358803	0.643426	0.735781	0.878972	-0.186112	-0.345644	0.194296	translational_only	0.316846	0.999545	-1	2	-1	2	1424	115	307	0.509831
uc007bqz.2	Serpine2	ENSMUST00000027467	73.5301	244	56.9993	112	27.8038	100	23.2606	62	69.2586	1052	77.299	1187	28.5781	599	23.0978	385	1.06167	0.737387	0.972906	1.00704	1.06167	0.737387	0.972906	1.00704	0.39121	0.352598	1.10055	0.13822	-1.40287	2.41006e-15	both	0.944044	0.999545	1	2	-1	-1	2055	177	684	0.473479
uc007brc.2	Cul3	ENSMUST00000163119	47.1625	305	31.0756	119	32.5283	228	32.1489	167	33.3908	988	29.781	892	29.1819	1192	22.8829	743	1.41244	1.04347	1.11467	1.40493	1.41244	1.04347	1.11467	1.40493	0.826671	0.824179	1.02593	0.0369376	-0.180683	1	translational_only	0.762509	0.999545	-1	2	-1	2	4919	379	2233	0.366741
uc007brp.2	Irs1	ENSMUST00000069799	42.2375	439	45.3207	279	21.0383	237	23.9562	200	20.7604	985	20.2207	971	10.9938	720	10.278	536	2.03452	2.2413	1.91365	2.33083	2.03452	2.2413	1.91365	2.33083	0.513881	0.519063	0.99267	-0.0106138	-0.846983	4.29225e-07	both	0.688984	0.999545	-1	2	-1	-1	9163	946	4521	0.490342
uc007brq.3	Rhbdd1	ENSMUST00000027322	20.5915	54	18.6753	29	16.1838	46	12.343	26	11.163	134	11.9382	145	5.79063	96	7.44773	98	1.84462	1.56433	2.79483		1.84462	1.56433	2.79483	1.65728	0.726486	0.573059	1.30601	0.385162	-0.715783	0.00510571	both	NA	NA	-1	2	-1	-1	3510	149	2413	0.457835
uc007brx.2	Mff	ENSMUST00000078332	38.4945	93	20.9462	30	12.2064	32	16.5093	32	54.8605	601	49.6229	552	30.2354	458	37.1737	449	0.701679	0.422107	0.403711	0.444111	0.701679	0.422107	0.403711	0.444111	0.483097	0.645166	0.754433	-0.406534	-0.535648	0.0135279	both	0.121602	0.999545	-1	2	-1	-1	1893	344	673	0.46804
uc007bse.2	Agfg1	ENSMUST00000189220	41.336	194	30.9458	86	37.9414	193	29.975	113	37.5876	807	38.3223	832	19.4812	578	22.4533	529	1.09972	0.807514	1.94759	1.33499	1.09972	0.807514	1.94759	1.33499	0.939605	0.552424	1.72112	0.783347	-0.75939	1.97709e-05	both	0.0143308	0.598474	1	1	-1	-1	7886	263	5943	0.387522
uc007bsy.1	Trip12	ENSMUST00000027421	31.3907	529	23.2507	234	21.6736	398	22.9994	313	16.8066	1254	17.263	1306	15.3159	1558	13.229	1095	1.86776	1.34685	1.41511	1.73856	1.86776	1.34685	1.41511	1.73856	0.817567	0.837839	0.981043	-0.0276122	-0.160863	1	translational_only	0.670293	0.999545	-1	2	-1	2	9632	125	3429	0.430233
uc007bum.2	Cab39	ENSMUST00000113360	30.3608	84	21.5771	36	12.6591	38	22.1589	50	17.4833	211	16.0083	198	10.6478	179	9.28082	127	1.73657	1.34787	1.1889	2.3876	1.73657	1.34787	1.1889	2.3876	0.670377	0.595034	1.15953	0.213539	-0.627283	0.00494104	both	NA	NA	-1	2	-1	-1	3800	418	2356	0.442105
uc007buy.1	Psmd1	ENSMUST00000027432	84.7323	681	56.7338	270	94.2484	821	79.1546	511	37.2921	1370	38.5781	1434	84.3293	4256	49.7382	2003	2.27212	1.47062	1.11762	1.59143	2.27212	1.47062	1.11762	1.59143	1.22576	1.76706	0.723813	-0.466311	0.91476	0.000364046	both	0.0296432	0.760671	-1	-1	1	1	3256	171	223	0.463452
uc007bvl.1	Ncl	ENSMUST00000027438	257.277	1075	144.557	432	205.768	959	150.115	570	73.3634	1159	57.5316	992	91.4136	1764	61.5625	1083	3.50689	2.51265	2.25095	2.43842	3.50689	2.51265	2.25095	2.43842	0.885647	1.16869	0.779026	-0.360258	0.179992	1	translational_only	0.203508	0.999545	-1	2	1	2	8257	232	5901	0.274434
uc007bvq.1	Pde6d	ENSMUST00000027444	31.912	39	19.3461	14	17.3639	23	24.4486	24	44.7939	250	40.5517	229	17.2148	133	24.1094	148	0.712419	0.477073	1.00866	1.01407	0.712419	0.477073	1.00866	1.01407	0.815724	0.484199	1.7005	0.765957	-0.954594	4.24322e-05	both	NA	NA	-1	2	-1	-1	1092	152	487	0.509158
uc007bvr.1	Cops7b	ENSMUST00000027446	18.2681	40	18.5106	24	17.2761	41	17.0572	30	22.4781	225	18.1438	184	13.7261	190	15.2749	168	0.812706	1.02022	1.25863	1.11668	0.812706	1.02022	1.25863	1.11668	0.933511	0.713925	1.29592	0.373973	-0.390509	0.222327	translational_only	0.403398	0.999545	1	2	-1	2	2231	152	1284	0.518602
uc007bvw.2	Dis3l2	ENSMUST00000168237	4.16025	31	4.53277	20	1.36201	11	1.50367	9	4.95481	169	5.27359	182	2.54741	120	3.17936	119	0.839638	0.859522	0.534662	0.472948	0.839638	0.859522	0.534662	0.472948	0.329653	0.55989	0.593005	-0.753885	-0.746511	0.00134496	both	NA	NA	-1	2	-1	-1	3171	164	352	0.514349
uc007bwk.1	Eif4e2	ENSMUST00000113233	67.1177	135	40.9682	49	8.66662	19	12.9072	21	142.429	1256	134.241	1189	14.656	184	15.7164	157	0.471236	0.305184	0.591337	0.821258	0.471236	0.305184	0.591337	0.821258	0.199599	0.109778	1.81937	0.863439	-3.04114	1.3782e-67	both	0.0577235	0.929969	1	2	-1	-1	1809	86	985	0.499724
uc007bwt.2	Gigyf2	ENSMUST00000027475	12.3886	135	14.0955	91	13.12	155	11.1903	98	6.42201	320	5.1569	260	6.69475	460	5.12339	280	1.92908	2.73332	1.95975	2.18415	1.92908	2.73332	1.95975	2.18415	0.917924	1.02066	0.888793	-0.170081	0.128555	1	translational_only	0.366198	0.999545	-1	2	1	2	5743	202	1665	0.472924
uc007bwy.2	Ngef	ENSMUST00000068681	7.02957	42	5.65308	20	1.69864	11	1.04184	5	7.24324	198	6.18242	171	1.53556	58	1.76684	53	0.9705	0.91438			0.9705	0.91438	1.1062	0.589666	0.216081	0.245977	0.89972	-0.152452	-1.93028	1.3285e-17	both	NA	NA	-1	2	-1	-1	3114	256	725	0.539178
uc007bxm.2	Atg16l1	ENSMUST00000027512	8.59368	45	10.9653	34	5.99066	34	5.70599	24	13.6917	328	11.5452	280	6.86101	227	6.08306	160	0.627655	0.949772	0.873146	0.938013	0.627655	0.949772	0.873146	0.938013	0.598019	0.512902	1.14817	0.199339	-0.862297	2.8576e-05	both	0.799532	0.999545	1	2	-1	-1	3180	189	1119	0.525472
uc007bxy.1	Usp40	ENSMUST00000040783	6.80704	71	4.53351	28	3.09597	35	2.98396	25	4.44157	212	4.24357	205	2.25968	149	1.71875	90	1.53258	1.06832	1.37009		1.53258	1.06832	1.37009	1.73612	0.536124	0.458074	1.19428	0.256146	-1.01836	3.15205e-06	both	NA	NA	-1	2	-1	-1	5316	133	1475	0.463506
uc007bym.2	Hjurp	ENSMUST00000054674	89.6641	503	73.1531	243	52.1361	317	45.7163	206	54.5482	1400	50.9584	1324	31.0204	1099	33.3946	941	1.64376	1.43555	1.68071	1.36897	1.64376	1.43555	1.68071	1.36897	0.600996	0.61053	0.99038	-0.0139466	-0.615413	0.000465424	both	0.718961	0.999545	-1	2	-1	-1	8439	110	6325	0.479204
uc007byt.1	Arl4c	ENSMUST00000159814	59.3445	92	32.2684	30	42.1782	71	47.1223	59	58.5436	398	56.7637	386	30.4325	289	32.6828	248	1.01368	0.568469	1.38596	1.44181	1.01368	0.568469	1.38596	1.44181	0.97476	0.547366	1.7873	0.837779	-0.74469	8.26593e-05	both	0.0165052	0.61139	1	1	-1	-1	3966	527	2860	0.515381
uc007byv.1	Sh3bp4	ENSMUST00000066279	24.1574	196	21.231	102	25.0176	220	27.6198	180	22.8066	847	23.8973	898	18.7686	962	22.7708	928	1.05923	0.888428	1.33295	1.21295	1.05923	0.888428	1.33295	1.21295	1.15971	0.889422	1.30716	0.386433	-0.0733161	1	translational_only	0.34656	0.999545	1	2	-1	2	3673	342	442	0.557855
uc007byw.1	Agap1	ENSMUST00000027521	14.8326	107	9.36784	40	13.0558	102	13.9953	81	17.2978	562	16.2877	538	10.9599	491	13.3313	477	0.857482	0.575148	1.19123	1.04981	0.857482	0.575148	1.19123	1.04981	1.11779	0.723263	1.56428	0.645502	-0.37416	0.144424	translational_only	0.0936704	0.959676	1	2	-1	2	9581	619	6388	0.508402
uc007bzi.1	Cops8	ENSMUST00000036153	72.4502	124	40.2559	41	46.2074	86	31.175	43	73.3634	551	65.2704	502	42.7253	447	46.0453	388	0.987552	0.616756	1.0815	0.67705	0.987552	0.616756	1.0815	0.67705	0.686586	0.640325	1.09614	0.132435	-0.532726	0.00828348	both	0.985975	0.999713	1	2	-1	-1	1843	125	1088	0.488334
uc007caf.1	Scly	ENSMUST00000027532	6.08506	22	6.07242	13	1.02078	4	0.688693	2	7.88007	130	7.41689	124	1.53134	35	2.03742	37	0.77221	0.818729			0.77221	0.818729	0.666592	0.338023	0.140611	0.233298	0.631461	-0.663235	-2.01191	5.01337e-16	both	NA	NA	-1	2	-1	-1	2207	58	850	0.563661
uc007cal.1	Ilkap	ENSMUST00000027534	30.8309	101	23.7137	46	22.8128	81	15.2012	40	88.5062	1318	89.6273	1354	51.2642	1058	48.1342	790	0.348347	0.264581	0.445005	0.315809	0.348347	0.264581	0.445005	0.315809	0.696935	0.557999	1.24128	0.311825	-0.739608	8.61406e-06	both	0.856926	0.999545	1	2	-1	-1	1368	78	111	0.525585
uc007cau.1	Hes6	ENSMUST00000086851	18.9175	35	13.6919	15	8.47761	17	7.40187	11	24.7969	210	21.0061	180	12.6537	148	19.1536	178	0.762897	0.651805	0.66997	0.386447	0.762897	0.651805	0.66997	0.386447	0.486961	0.694438	0.746742	-0.421318	-0.437477	0.271631	translational_only	NA	NA	-1	2	-1	2	1335	85	575	0.602996
uc007cav.1	Per2	ENSMUST00000069620	2.44888	26	3.02221	19	1.65156	19	1.28985	11	2.05823	100	2.21666	109	0.819442	55	1.06882	57		1.36341			1.1898	1.36341	2.01546	1.2068	0.537627	0.441711	1.26204	0.335762	-1.09299	2.14711e-05	both	NA	NA	-1	2	-1	-1	5837	174	1889	0.533151
uc007cax.2	Traf3ip1	ENSMUST00000047242	10.2791	54	5.14349	16	5.97131	34	4.50265	19	3.20555	77	2.83894	69	4.85306	161	2.5025	66	3.20666		1.23042		3.20666	1.81176	1.23042	1.79926	0.679131	1.2169	0.603712	-0.728069	0.392917	0.776802	translational_only	NA	NA	-1	2	1	2	3500	98	1524	0.473714
uc007cbd.2	Twist2	ENSMUST00000007949	66.7256	84	42.7358	32	15.9092	22	24.928	26	124.295	676	128.344	713	37.3649	284	46.2031	281	0.536833	0.332979	0.42578	0.53953	0.536833	0.332979	0.42578	0.53953	0.373074	0.330781	1.10979	0.150288	-1.48667	1.71465e-16	both	0.977321	0.999713	1	2	-1	-1	1335	166	686	0.548315
uc007cbh.1	Ndufa10	ENSMUST00000027478	81.7054	239	59.0091	103	50.1509	159	45.3205	107	77.6899	1002	83.3298	1094	72.4453	1271	57.9504	821	1.05169	0.708139	0.692259	0.782056	1.05169	0.708139	0.692259	0.782056	0.678476	0.809813	0.837762	-0.255388	-0.220885	0.703831	translational_only	0.225091	0.999545	-1	2	-1	2	1209	21	120	0.528536
uc007cbs.1	Gpc1	ENSMUST00000045970	116.616	545	122.501	339	83.8529	425	90.2513	339	79.4725	1697	82.6168	1785	48.8584	1440	53.815	1261	1.46738	1.48276	1.71624	1.67707	1.46738	1.48276	1.71624	1.67707	0.728112	0.633437	1.15022	0.20191	-0.562023	0.00148423	both	0.652971	0.999545	1	2	-1	-1	3552	246	1632	0.601351
uc007cbw.2	Rnpepl1	ENSMUST00000027487	11.8819	72	10.5904	38	9.28779	61	9.45072	46	15.1562	420	14.2235	399	10.081	386	9.79509	298	0.783962	0.744572	0.921315	0.964843	0.783962	0.744572	0.921315	0.964843	0.833848	0.676524	1.23397	0.303302	-0.465213	0.0280531	both	0.635627	0.999545	1	2	-1	-1	3039	146	730	0.591971
uc007cby.1	Capn10	ENSMUST00000027488	8.92643	50	6.02996	20	2.9649	18	4.22294	19	13.3846	343	12.534	325	5.45037	193	7.57048	213	0.66692	0.481089	0.543981	0.557817	0.66692	0.481089	0.543981	0.557817	0.480586	0.502376	0.959746	-0.0592752	-0.901976	4.74153e-05	both	0.593008	0.999545	-1	2	-1	-1	2877	466	410	0.57838
uc007cdm.1	Sned1	ENSMUST00000062202	12.1456	144	14.244	100	3.26839	42	2.2051	21	5.38305	292	5.10029	280	1.01398	76	1.04108	62	2.25626	2.79278			2.25626	2.79278	3.22332	2.11809	0.207411	0.196031	1.05791	0.0812128	-2.25182	2.62918e-29	both	NA	NA	-1	2	-1	-1	4474	92	170	0.584712
uc007cdo.2	Mterf4	ENSMUST00000027492	7.28481	21	2.9263	5	6.71462	21	2.58867	6	9.11205	120	8.55529	114	8.85195	161	7.6042	110	0.79947		0.758547		0.79947	0.342046	0.758547	0.340427	0.911095	0.931445	0.962732	-0.0547937	0.00131115	1	translational_only	NA	NA	-1	2	1	2	1330	34	255	0.478195
uc007cdt.2	Pask	ENSMUST00000027493	4.53517	53	4.33526	30	2.76322	35	2.87631	27	5.8699	314	5.96758	323	3.06054	226	2.70995	159	0.772616	0.726469	0.902854	1.06139	0.772616	0.726469	0.902854	1.06139	0.635766	0.487476	1.31029	0.38989	-0.935485	8.24078e-07	both	0.455774	0.999545	1	2	-1	-1	5119	312	655	0.496581
uc007cdv.1	Ppp1r7	ENSMUST00000027494	43.1486	130	27.466	49	19.2927	63	14.0493	34	22.9861	317	21.2842	297	15.8708	302	14.0086	212	1.87716	1.29044	1.21561	1.00291	1.87716	1.29044	1.21561	1.00291	0.472169	0.674931	0.700377	-0.513796	-0.467264	0.0425124	both	0.0375563	0.855177	-1	-1	-1	-1	3653	15	2552	0.349028
uc007cec.2	Farp2	ENSMUST00000120301	22.874	205	17.8732	95	9.15657	89	9.71467	70	9.35686	383	8.9123	369	5.37174	303	5.87001	264	2.44462	2.00545	1.70458	1.65497	2.44462	2.00545	1.70458	1.65497	0.46313	0.61534	0.754942	-0.405562	-0.605246	0.00238803	both	0.057666	0.929969	-1	2	-1	-1	3912	109	605	0.494121
uc007ced.1	Stk25	ENSMUST00000027498	37.8736	135	40.3035	85	23.0551	89	16.7781	48	85.2689	1378	82.8816	1352	41.1515	917	42.3139	754	0.444167	0.486278	0.560249	0.396515	0.444167	0.486278	0.560249	0.396515	0.509525	0.496373	1.02829	0.0402433	-0.909178	1.7453e-08	both	0.66387	0.999545	-1	2	-1	-1	3254	237	1736	0.471112
uc007cee.2	Bok	ENSMUST00000027499	34.7225	61	28.8389	30	34.6621	66	36.8501	52	116.148	934	121.869	990	75.9049	843	80.4592	710	0.298951	0.236638	0.456651	0.457997	0.298951	0.236638	0.456651	0.457997	1.12509	0.656945	1.70774	0.77209	-0.507761	0.00611968	both	0.209151	0.999545	1	2	-1	-1	1559	309	608	0.596536
uc007cef.1	Thap4	ENSMUST00000190116	19.7667	94	14.8534	42	7.92161	41	9.64619	37	33.7014	724	32.8011	716	15.7599	469	18.5725	441	0.586523	0.452832	0.502644	0.51938	0.586523	0.452832	0.502644	0.51938	0.507446	0.516257	0.983324	-0.0242614	-0.85405	2.22593e-06	both	0.574688	0.999545	-1	2	-1	-1	2160	305	145	0.578241
uc007cej.1	Atg4b	ENSMUST00000027502	16.0819	51	9.90598	19	8.30379	29	8.07124	21	21.0955	280	21.0442	284	11.9551	223	12.7229	192	0.762338	0.470723	0.69458	0.634388	0.762338	0.470723	0.69458	0.634388	0.630102	0.585624	1.07778	0.108061	-0.64118	0.00161063	both	0.914299	0.999545	-1	2	-1	-1	2964	12	1770	0.512146
uc007cek.2	Dtymk	ENSMUST00000027503	81.6181	142	63.7536	66	35.944	68	32.0443	45	201.295	1577	214.207	1698	75.742	829	86.1134	755	0.405466	0.297627	0.474558	0.372117	0.405466	0.297627	0.474558	0.372117	0.467686	0.389542	1.20422	0.268094	-1.24069	3.57726e-14	both	0.916951	0.999545	1	2	-1	-1	1003	107	257	0.50349
uc007cen.1	Ing5	ENSMUST00000027505	21.3618	42	9.42127	11	7.47596	16	7.57661	12	10.0189	89	6.43414	58	5.04625	62	3.67699	36	2.13214				2.13214	1.46426	1.48149	2.06055	0.488989	0.530189	0.984883	-0.0219757	-0.801139	0.0305922	both	NA	NA	-1	2	-1	-1	4538	38	3777	0.426179
uc007cey.2	Fam174a	ENSMUST00000059975	19.2112	30	7.57022	7	7.6808	13	0.797237	1	44.0067	310	39.1396	280	14.0301	137	18.6889	145	0.436553	0.193416	0.54745	0.0426583	0.436553	0.193416	0.54745	0.0426583	0.316564	0.393512	0.936727	-0.0942995	-1.25326	3.13793e-09	both	NA	NA	-1	2	-1	-1	2107	189	1345	0.440437
uc007cfn.2	Gin1	ENSMUST00000027571	2.53148	11	1.16595	3	4.67126	22	2.86507	10	4.37405	87	4.472	90	5.97017	164	6.46006	141			0.782433	0.443505	0.57875	0.260722	0.782433	0.443505	2.03826	1.40517	1.46037	0.546333	0.585035	0.0208637	both	NA	NA	-1	2	1	1	2785	91	1137	0.355835
uc007cfo.1	Pam	ENSMUST00000097625	51.5199	425	40.7394	199	32.9941	295	28.8252	191	43.303	1634	42.7823	1634	40.0221	2085	23.9246	991	1.18975	0.952249	0.824399	1.20484	1.18975	0.952249	0.824399	1.20484	0.670061	0.742828	0.947356	-0.0780222	-0.329956	0.545863	translational_only	0.408682	0.999545	-1	2	-1	2	4103	450	716	0.498416
uc007cgf.3	Pign	ENSMUST00000186485	8.66202	68	9.25028	43	4.46604	38	5.70908	36	5.01097	180	4.62059	168	3.58667	178	2.91638	115	1.72861	2.00197	1.24518	1.95759	1.72861	2.00197	1.24518	1.95759	0.568052	0.675181	0.858518	-0.220079	-0.46173	0.0946406	translational_only	NA	NA	-1	2	-1	2	6777	399	3582	0.365796
uc007cgk.2	2310035C23Rik	ENSMUST00000086721	9.34841	96	5.75587	35	5.57041	62	5.45547	45	5.87163	276	6.09736	290	3.31181	215	3.25695	168	1.59213	0.943993	1.68198	1.67502	1.59213	0.943993	1.68198	1.67502	0.729984	0.548815	1.32368	0.404549	-0.766924	7.5175e-05	both	0.227777	0.999545	1	2	-1	-1	5406	247	1508	0.441361
uc007cgp.1	Tnfrsf11a	ENSMUST00000027559	8.95144	47	10.2925	32	0.175627	1	0.473963	2	5.15663	124	5.34584	130	0.361329	12	0.189482	5	1.73591	1.92533			1.73591	1.92533	0.486058	2.50136	0.0337555	0.0524459	0.815958	-0.293433	-4.08671	4.75546e-39	both	NA	NA	-1	2	-1	-1	5022	29	3115	0.354839
uc007cgt.3	Zcchc2	ENSMUST00000118196	11.0814	109	12.5298	73	7.59989	81	9.23676	73	5.84127	263	5.14087	234	3.63967	226	4.13485	204	1.89709	2.43728	2.08807	2.23388	1.89709	2.43728	2.08807	2.23388	0.71308	0.707924	0.997135	-0.00413994	-0.40551	0.134164	translational_only	0.784797	0.999545	-1	2	-1	2	5801	384	1916	0.499397
uc007cgv.2	Phlpp1	ENSMUST00000061047	16.4054	234	13.3844	113	9.96535	154	12.4838	143	9.02028	588	8.29655	547	5.33059	480	5.70822	408	1.81872	1.61324	1.86946	2.18698	1.81872	1.61324	1.86946	2.18698	0.753586	0.637462	1.18196	0.24118	-0.553355	0.00453948	both	0.533799	0.999545	1	2	-1	-1	6104	135	905	0.496068
uc007cgy.2	Kdsr	ENSMUST00000010049	21.8202	60	18.3494	30	16.8113	50	13.5547	30	14.9779	186	18.4198	230	15.1426	257	15.6141	213	1.45683	0.996174	1.1102	0.868104	1.45683	0.996174	1.1102	0.868104	0.755944	0.920923	0.806482	-0.310286	-0.0235544	1	translational_only	0.18351	0.999545	-1	2	-1	2	5582	91	4492	0.378896
uc007chn.2	Serpinb2	ENSMUST00000009356	18.1497	63	8.27092	17	1.32901	5	0	0	20.998	332	21.2353	340	0.729732	16	1.14708	20	0.864352	0.389489			0.864352	0.389489	1.82123	0	0.0503019	0.0444391	1.45252	0.538556	-4.40954	1.17694e-70	both	NA	NA	-1	2	-1	-1	1972	65	659	0.384888
uc007chy.1	Dsel	ENSMUST00000035462	4.61112	47	4.6392	28	1.81037	20	1.58784	13	5.01682	234	5.80413	274	1.69159	109	1.75787	90	0.919134	0.799293	1.07022		0.919134	0.799293	1.07022	0.903272	0.367361	0.318777	1.14843	0.19966	-1.55154	1.01041e-14	both	NA	NA	-1	2	-1	-1	5763	1661	478	0.407774
uc007cib.1	Tsn	ENSMUST00000027623	84.9218	160	47.5063	53	47.9904	98	44.9326	68	53.0338	456	52.3352	456	37.7263	448	37.7227	357	1.60128	0.907731	1.27207	1.19113	1.60128	0.907731	1.27207	1.19113	0.701686	0.716045	0.981741	-0.0265853	-0.383122	0.0877803	translational_only	0.738076	0.999545	-1	2	-1	2	3039	66	2286	0.375782
uc007cic.2	Nifk	ENSMUST00000027626	50.1184	132	21.1372	33	28.8805	82	25.5253	54	23.5327	277	23.1558	277	29.0561	463	23.6901	306	2.12974	0.912825	0.993958	1.07747	2.12974	0.912825	0.993958	1.07747	0.76353	1.12975	0.680817	-0.554662	0.257675	0.587304	translational_only	0.0460635	0.914317	-1	-1	1	2	1894	50	890	0.428722
uc007cim.1	Gli2	ENSMUST00000062483	3.75398	49	3.10515	24	0.919099	13	1.14454	12	2.32998	139	2.46574	149	0.752502	62	0.839961	55	1.61116	1.25932			1.61116	1.25932	1.22139	1.36261	0.30086	0.332059	0.900198	-0.151686	-1.49719	3.1345e-11	both	NA	NA	-1	2	-1	-1	6708	349	1724	0.565593
uc007cir.1	Inhbb	ENSMUST00000038765	4.65497	16	4.42561	9	9.93997	37	9.77944	27	3.3742	53	2.83374	45	6.31606	136	5.62292	97			1.57376		1.37958	1.56175	1.57376	1.73921	2.1716	1.92318	1.12635	0.171657	1.03934	5.9975e-05	both	NA	NA	-1	2	1	1	4255	1162	1857	0.572503
uc007cis.2	Ralb	ENSMUST00000004565	63.0385	107	44.7724	45	26.6347	49	22.0037	30	60.5379	468	56.5397	443	22.3103	239	24.5543	209	1.04131	0.791876	1.19383	0.896124	1.04131	0.791876	1.19383	0.896124	0.451145	0.400287	1.14007	0.189121	-1.22182	1.03072e-11	both	0.800211	0.999545	1	2	-1	-1	2277	255	1401	0.488801
uc007ciu.2	Tmem185b	ENSMUST00000183952	19.524	57	12.1476	21	9.16475	29	8.10215	19	20.5034	274	21.637	292	7.21318	133	10.5799	155	0.952229	0.561426	1.27056	0.765806	0.952229	0.561426	1.27056	0.765806	0.545187	0.422233	1.34533	0.427957	-1.15589	3.18928e-07	both	NA	NA	-1	2	-1	-1	2830	357	1420	0.489046
uc007cje.1	Dbi	ENSMUST00000151708	108.066	107	47.1717	29	48.6505	54	29.7348	25	174.057	577	168.666	579	87.1196	416	93.3853	349	0.620865	0.279675	0.558433	0.31841	0.620865	0.279675	0.558433	0.31841	0.504937	0.526678	0.973686	-0.0384711	-0.795291	6.06696e-06	both	0.685686	0.999545	-1	2	-1	-1	593	5	180	0.492411
uc007cji.1	Steap3	ENSMUST00000112640	44.0025	180	28.8988	70	27.0654	120	24.0428	79	26.8097	502	28.8715	547	16.0864	416	18.6397	383	1.64129	1.00094	1.6825	1.28987	1.64129	1.00094	1.6825	1.28987	0.701061	0.62366	1.12495	0.169857	-0.585671	0.00317612	both	0.696636	0.999545	1	2	-1	-1	2755	57	1231	0.540472
uc007cjm.2	En1	ENSMUST00000079721	10.4405	35	6.54899	13	0.825667	3	0.742742	2	6.66406	102	5.9455	92	0.425035	9	0.653255	11	1.56669				1.56669	1.1015	1.94259	1.13699	0.0923162	0.0855137	1.15418	0.206865	-3.46078	2.01571e-26	both	NA	NA	-1	2	-1	-1	2554	546	802	0.514879
uc007cju.2	Ccdc93	ENSMUST00000036025	14.5631	77	10.8597	34	9.42295	54	5.65104	24	4.99956	121	4.37177	107	4.22062	141	2.63571	70	2.91288	2.48406	2.2326		2.91288	2.48406	2.2326	2.14403	0.59293	0.731628	0.810947	-0.302321	-0.339687	0.666375	translational_only	NA	NA	-1	2	-1	2	7256	149	5217	0.391538
uc007ckg.1	Slc35f5	ENSMUST00000027580	20.6997	91	13.8293	36	10.9133	52	9.34522	33	17.542	353	17.779	362	10.5855	294	12.4535	275	1.18001	0.777844	1.03097	0.750411	1.18001	0.777844	1.03097	0.750411	0.586709	0.652272	0.909865	-0.136276	-0.522574	0.0155091	both	0.447671	0.999545	-1	2	-1	-1	2597	229	793	0.45437
uc007ckr.1	Mgat5	ENSMUST00000038361	5.29749	33	4.60873	17	5.92441	40	6.79498	34	4.52611	129	4.74847	137	4.21526	166	3.99486	125	1.17043	0.97057	1.40547	1.70093	1.17043	0.97057	1.40547	1.70093	1.28398	0.885228	1.45091	0.536959	-0.0758168	1	translational_only	NA	NA	-1	2	-1	2	3104	634	247	0.537693
uc007ckz.1	Ccnt2	ENSMUST00000027587	9.69583	59	8.32588	30	7.88434	52	6.34232	31	7.54638	210	7.03201	198	7.85421	302	5.66261	173	1.28483	1.184	1.00384	1.12003	1.28483	1.184	1.00384	1.12003	0.789417	0.927181	0.860275	-0.217131	-0.0044098	1	translational_only	0.252393	0.999545	-1	2	-1	2	3514	64	1278	0.455037
uc007clc.2	Rab3gap1	ENSMUST00000037649	15.67	129	12.2748	60	13.6497	122	11.1411	74	7.06421	264	6.67918	253	6.83457	353	4.49865	185	2.21823	1.83777	1.99716	2.47655	2.21823	1.83777	1.99716	2.47655	0.887134	0.824631	1.10298	0.141412	-0.173101	1	translational_only	0.796341	0.999545	1	2	-1	2	4251	39	1266	0.475418
uc007clj.1	R3hdm1	ENSMUST00000036288	15.7685	151	13.9239	79	12.3253	128	11.9571	92	15.7009	687	17.3193	767	10.9781	664	11.7358	564	1.00431	0.803955	1.12271	1.01886	1.00431	0.803955	1.12271	1.01886	0.817798	0.687882	1.18432	0.244064	-0.441549	0.0305912	both	0.688806	0.999545	1	2	-1	-1	4812	427	977	0.466542
uc007cll.1	Ubxn4	ENSMUST00000027592	58.2075	247	50.9411	128	49.7905	229	49.2884	168	28.0957	545	32.0258	629	43.09	1149	24.8985	530	2.07175	1.59063	1.1555	1.97957	2.07175	1.59063	1.1555	1.97957	0.907743	1.13085	0.856021	-0.224282	0.273341	0.906685	translational_only	0.157475	0.999545	-1	2	1	2	4093	290	2282	0.3914
uc007cln.2	Mcm6	ENSMUST00000027601	90.1016	612	62.5533	254	55.4355	411	42.6113	235	46.2545	1383	48.8184	1475	38.7296	1591	21.9635	730	1.94795	1.28135	1.43135	1.9401	1.94795	1.28135	1.43135	1.9401	0.642277	0.638385	1.04402	0.0621443	-0.544516	0.0913421	translational_only	0.910036	0.999545	-1	2	-1	2	2966	140	360	0.494943
uc007clp.2	Dars	ENSMUST00000027602	85.9318	361	45.0237	112	55.5644	253	42.9703	145	57.1764	1098	60.6769	1179	52.2157	1383	45.7783	966	1.50292	0.742023	1.06413	0.938661	1.50292	0.742023	1.06413	0.938661	0.752428	0.831491	0.892133	-0.164669	-0.167573	0.998019	translational_only	0.448413	0.999545	-1	2	-1	2	2232	199	527	0.419355
uc007cmv.2	Mapkapk2	ENSMUST00000016672	109.918	352	78.2303	149	52.0677	182	60.2208	156	156.198	2233	144.064	2082	60.6212	1211	85.3814	1354	0.70371	0.543024	0.858903	0.705315	0.70371	0.543024	0.858903	0.705315	0.596808	0.48625	1.25465	0.327287	-0.927833	6.50496e-06	both	0.612287	0.999545	1	2	-1	-1	2870	318	1391	0.556794
uc007cmz.2	Eif2d	ENSMUST00000068805	14.2908	68	16.602	47	8.68416	45	5.72878	22	37.425	788	34.9693	745	16.7171	493	17.0486	399	0.381852	0.47476	0.519479	0.336027	0.381852	0.47476	0.519479	0.336027	0.466547	0.466413	0.99871	-0.00186296	-0.983629	5.87229e-09	both	0.604333	0.999545	-1	2	-1	-1	1976	163	100	0.529352
uc007cng.2	Srgap2	ENSMUST00000097588	11.9638	108	10.8403	58	6.02636	59	7.16689	52	6.57489	271	6.66172	278	3.58141	204	3.13458	142	1.81962	1.62726	1.68268	2.2864	1.81962	1.62726	1.68268	2.2864	0.578546	0.50738	1.1515	0.203511	-0.875368	8.35501e-06	both	NA	NA	-1	2	-1	-1	8040	718	4106	0.449627
uc007cnu.3	Slc41a1	ENSMUST00000086559	9.31454	40	8.65168	22	11.1721	52	12.4741	43	11.5124	226	13.6344	271	6.88817	187	7.65433	165	0.809089	0.63455	1.62192	1.62968	0.809089	0.63455	1.62192	1.62968	1.31615	0.578306	2.25237	1.17144	-0.693891	0.00144664	both	0.000618443	0.256785	1	1	-1	-1	4661	993	2129	0.521347
uc007cnv.3	Rab29	ENSMUST00000027693	4.16567	7	4.01997	4	1.64716	3	7.40867	10	16.771	129	14.1337	110	6.68353	71	9.00401	76	0.248385				0.248385	0.284424	0.246451	0.822819	1.10631	0.507609	2.00685	1.00494	-0.892272	0.000914362	both	NA	NA	-1	2	-1	-1	1191	267	309	0.502099
uc007cny.2	Nucks1	ENSMUST00000062264	188.388	364	118.869	136	76.7665	161	74.7418	116	55.3217	490	48.8552	434	53.8417	649	32.5438	314	3.40532	2.43308	1.42578	2.29665	3.40532	2.43308	1.42578	2.29665	0.4931	0.829219	0.637578	-0.649327	-0.180139	1	translational_only	0.00153223	0.305716	-1	-1	-1	2	6096	276	5115	0.384514
uc007coc.1	Elk4	ENSMUST00000086556	33.9303	122	30.036	64	14.8711	58	16.6066	48	21.1608	348	21.772	362	11.1214	252	10.0296	181	1.60345	1.37957	1.33717	1.65576	1.60345	1.37957	1.33717	1.65576	0.492098	0.492653	1.00332	0.00477996	-0.921616	8.15583e-07	both	0.69546	0.999545	-1	2	-1	-1	3671	345	2033	0.449469
uc007coh.2	Cdk18	ENSMUST00000027697	10.3343	39	4.0275	9	11.482	47	11.2247	34	7.18095	122	7.13346	123	7.15349	169	9.74893	183	1.43913	0.564594	1.6051	1.15138	1.43913	0.564594	1.6051	1.15138	1.58105	1.1808	1.37568	0.460141	0.337016	0.46258	translational_only	NA	NA	-1	2	1	2	3046	301	1389	0.573211
uc007con.1	Klhdc8a	ENSMUST00000046071	69.8753	204	61.3162	106	14.8532	47	19.1893	45	165.011	2203	162.806	2195	22.1277	408	27.8221	408	0.42346	0.376622	0.671251	0.689716	0.42346	0.376622	0.671251	0.689716	0.259487	0.152371	1.70104	0.766413	-2.6178	9.33652e-51	both	0.100196	0.988949	1	2	-1	-1	4269	651	2565	0.538534
uc007coo.2	Nuak2	ENSMUST00000082125	15.4674	82	8.28234	26	8.17957	47	9.62297	41	14.1496	343	12.4416	305	5.73801	192	7.13498	190	1.09313	0.665697	1.42551	1.3487	1.09313	0.665697	1.42551	1.3487	0.749589	0.484107	1.5773	0.65746	-0.95363	4.50537e-06	both	0.0613824	0.929969	1	2	-1	-1	3108	105	1107	0.538932
uc007cot.2	Tmcc2	ENSMUST00000045473	8.24803	49	10.2337	36	4.65912	30	6.28978	30	15.5335	421	13.8735	381	6.15953	231	6.98029	208	0.530984	0.737646	0.756409	0.901077	0.530984	0.737646	0.756409	0.901077	0.592418	0.446827	1.30652	0.385725	-1.06584	1.80572e-08	both	0.483397	0.999545	1	2	-1	-1	3515	203	1191	0.578094
uc007cou.1	Dstyk	ENSMUST00000045110	8.18789	64	8.42623	39	5.07563	43	3.82258	24	3.82909	137	3.39762	123	1.47732	73	1.7829	70	2.13834	2.48004			2.13834	2.48004	3.43569	2.14403	0.535581	0.451135	1.20816	0.272807	-1.05831	1.05289e-05	both	NA	NA	-1	2	-1	-1	6385	153	3448	0.490368
uc007cpt.2	Ppp1r15b	ENSMUST00000052529	47.916	281	50.1071	174	28.9481	184	34.1785	161	18.6726	501	19.4121	527	12.2577	454	11.4743	338	2.56612	2.58124	2.36163	2.9787	2.56612	2.58124	2.36163	2.9787	0.643998	0.623139	1.03749	0.0530976	-0.583289	0.0020058	both	0.918493	0.999545	-1	2	-1	-1	5588	581	2913	0.423228
uc007cqr.2	Zbed6	ENSMUST00000190574	26.4934	219	20.2257	99	15.9609	143	19.2777	128	9.3854	355	10.2425	392	7.46308	390	7.9718	331	2.82283	1.97469	2.13865	2.41824	2.82283	1.97469	2.13865	2.41824	0.754267	0.786376	0.949843	-0.0742383	-0.249559	0.553945	translational_only	0.596026	0.999545	-1	2	-1	2	5007	1288	776	0.412223
uc007cqv.3	Atp2b4	ENSMUST00000143567	5.99463	61	6.64403	40	3.44736	38	2.69384	22	2.19535	102	2.98383	140	1.37716	88	1.5512	79	2.73061	2.22667			2.73061	2.22667	2.50325	1.73661	0.485906	0.565409	0.855279	-0.225532	-0.73069	0.00839894	both	NA	NA	-1	2	-1	-1	8103	468	4017	0.477848
uc007crc.3	Prelp	ENSMUST00000048432	16.4707	52	17.6522	33	1.16896	4	1.57733	4	8.37292	121	9.3693	137	0.901866	18	0.945879	15	1.96714	1.88405			1.96714	1.88405	1.29615	1.66758	0.0804821	0.104144	0.769563	-0.377888	-3.15853	4.29716e-30	both	NA	NA	-1	2	-1	-1	3602	163	2302	0.525541
uc007crd.1	Fmod	ENSMUST00000048183	42.9916	135	33.8818	63	3.81964	13	0.792928	2	24.7675	356	23.7905	346	0.55412	11	0.697394	11	1.73581	1.42417			1.73581	1.42417	6.89317	1.13699	0.0600021	0.0257736	2.5412	1.34551	-5.18048	1.91726e-84	both	NA	NA	-1	2	-1	-1	2859	76	1652	0.537251
uc007cre.1	Btg2	ENSMUST00000020692	24.8061	32	23.5644	18	7.15216	10	4.82538	5	29.7547	173	28.7469	171	5.77591	47	9.4973	61	0.833686	0.819721			0.833686	0.819721	1.23827	0.508079	0.247621	0.261073	1.05622	0.078904	-1.85526	3.8104e-14	both	NA	NA	-1	2	-1	-1	3083	102	2504	0.475511
uc007crq.1	Tmem183a	ENSMUST00000049470	20.6201	63	9.76853	18	15.9165	53	17.9124	44	59.9238	762	50.4948	653	38.521	671	36.5659	517	0.344105	0.193456	0.413191	0.489866	0.344105	0.193456	0.413191	0.489866	1.11321	0.68002	1.67992	0.748389	-0.458911	0.0321216	both	0.209601	0.999545	1	2	-1	-1	3169	129	1912	0.420322
uc007cru.1	Cyb5r1	ENSMUST00000027726	71.5672	181	45.3561	68	17.4717	48	22.6184	46	64.8478	744	68.0618	791	24.245	382	23.193	292	1.10362	0.666395	0.720633	0.975222	1.10362	0.666395	0.720633	0.975222	0.342875	0.356919	0.958103	-0.061748	-1.39237	3.41357e-17	both	0.55348	0.999545	-1	2	-1	-1	1626	49	659	0.504305
uc007csc.1	Rabif	ENSMUST00000047978	34.2409	34	20.4091	12	17.6542	19	15.0453	12	34.1021	155	29.7896	137	10.8327	68	12.0296	60	1.00407	0.685108			1.00407	0.685108	1.62972	1.25068	0.598345	0.35783	1.70521	0.769949	-1.38848	1.22532e-09	both	NA	NA	-1	2	-1	-1	1959	24	1563	0.348137
uc007csu.1	Arl8a	ENSMUST00000027684	69.8985	105	53.1621	48	25.7478	42	32.9644	40	68.4909	447	59.2779	393	26.8134	246	32.3745	236	1.02055	0.896828	0.960259	1.01822	1.02055	0.896828	0.960259	1.01822	0.4771	0.463242	1.03187	0.0452558	-0.993863	5.54302e-07	both	0.726549	0.999545	-1	2	-1	-1	1702	144	997	0.528202
uc007csy.2	Rnpep	ENSMUST00000077340	45.3751	248	24.1011	78	22.6204	134	19.5893	86	34.2155	856	36.7975	931	19.8934	687	23.5915	647	1.32616	0.654966	1.13708	0.830352	1.32616	0.654966	1.13708	0.830352	0.607541	0.612351	0.99309	-0.0100043	-0.612255	0.00130685	both	0.805612	0.999545	-1	2	-1	-1	2301	76	272	0.546284
uc007csz.1	Timm17a	ENSMUST00000081104	25.0109	30	19.7235	15	18.4468	25	14.196	15	61.0472	200	62.5842	205	39.0486	169	44.6399	170	0.409697	0.315152	0.472405	0.318011	0.409697	0.315152	0.472405	0.318011	0.729701	0.676919	1.09046	0.124931	-0.446882	0.112757	translational_only	0.975483	0.999713	1	2	-1	2	917	18	383	0.474373
uc007cta.1	Lmod1	ENSMUST00000059352	29.4072	147	13.5137	40	6.83303	37	3.48673	14	14.1323	323	12.9726	300	4.68338	148	3.38525	85	2.08085	1.04171	1.459		2.08085	1.04171	1.459	1.02998	0.240437	0.297681	0.797095	-0.327177	-1.63686	4.61516e-15	both	NA	NA	-1	2	-1	-1	3942	197	1957	0.522577
uc007ctc.1	Shisa4	ENSMUST00000041240	62.9244	102	70.8441	68	34.7198	61	29.9527	39	60.0786	445	59.5393	447	22.8347	234	26.651	217	1.04737	1.18987	1.52049	1.12389	1.04737	1.18987	1.52049	1.12389	0.483466	0.413698	1.18198	0.241206	-1.178	1.06535e-10	both	0.633381	0.999545	1	2	-1	-1	1190	102	494	0.572269
uc007cte.1	Ipo9	ENSMUST00000041023	81.2495	713	62.3724	324	50.3612	479	45.4271	320	40.7443	1634	41.4489	1683	24.3874	1349	24.7362	1090	1.99413	1.5048	2.06505	1.83646	1.99413	1.5048	2.06505	1.83646	0.666947	0.597661	1.11506	0.157115	-0.645471	0.000107615	both	0.690669	0.999545	1	2	-1	-1	6236	61	3052	0.484606
uc007ctg.2	Nav1	ENSMUST00000040599	3.5935	57	2.6617	25	6.10747	105	9.96781	127	1.8459	134	1.64705	121	4.78765	480	4.7083	375	1.94675	1.61605	1.27567	2.11707	1.94675	1.61605	1.27567	2.11707	2.56991	2.71861	0.95227	-0.0705571	1.53965	8.68173e-17	both	NA	NA	-1	2	1	1	12767	35	7104	0.492128
uc007cto.1	Csrp1	ENSMUST00000027677	405.617	568	245.809	217	172.077	277	149.759	179	411.16	2332	378.655	2178	155.433	1237	187.045	1212	0.98652	0.649164	1.10708	0.800658	0.98652	0.649164	1.10708	0.800658	0.494048	0.433618	1.16632	0.221969	-1.06883	1.29721e-09	both	0.659298	0.999545	1	2	-1	-1	1770	79	1109	0.550282
uc007ctq.2	Phlda3	ENSMUST00000038945	214.865	217	230.76	138	51.159	56	49.3081	40	270.937	1249	265.738	1243	51.5179	328	54.9545	278	0.793042	0.868374	0.993034	0.897253	0.793042	0.868374	0.993034	0.897253	0.225452	0.198393	1.13776	0.186192	-2.23893	1.32651e-42	both	0.827746	0.999545	1	2	-1	-1	1467	364	725	0.629857
uc007cub.2	Pkp1	ENSMUST00000027667	7.34391	45	4.40972	16	7.52859	50	2.64126	13	3.60096	101	3.66459	104	1.88451	73	2.40426	74	2.03943				2.03943	1.20333	3.99499	1.09857	0.865252	0.590288	1.57075	0.651453	-0.673304	0.0167447	both	NA	NA	-1	2	-1	-1	4670	195	2288	0.529764
uc007cue.2	Tmem9	ENSMUST00000063719	52.5903	79	35.9753	32	65.1049	106	59.6712	72	76.0568	521	83.3784	579	71.6354	679	99.3975	750	0.691461	0.431471	0.908836	0.600329	0.691461	0.431471	0.908836	0.600329	1.40885	1.07274	1.34395	0.42648	0.199403	1	translational_only	0.446753	0.999545	1	2	1	2	1460	98	810	0.549315
uc007cuq.1	Camsap2	ENSMUST00000048309	10.6462	133	7.57022	56	8.86246	120	9.46719	95	5.21481	298	5.35898	310	3.91347	309	4.1443	260	2.04154	1.41262	2.26461	2.28439	2.04154	1.41262	2.26461	2.28439	1.00621	0.762052	1.31696	0.397211	-0.295229	0.353073	translational_only	0.170821	0.999545	1	2	-1	2	7823	667	2719	0.457625
uc007cuu.2	Ddx59	ENSMUST00000027655	4.99764	26	3.24614	10	3.01488	17	2.87161	12	6.04695	144	5.93802	143	3.55744	117	2.79351	73	0.826472	0.546671	0.847484		0.826472	0.546671	0.847484	1.02796	0.714052	0.52991	1.3658	0.44975	-0.80714	0.000726351	both	NA	NA	-1	2	-1	-1	2228	164	204	0.496858
uc007cux.2	Zfp281	ENSMUST00000047734	13.9482	105	12.1189	54	14.9582	122	11.9073	72	7.12083	245	7.15251	249	7.75673	369	8.07521	305	1.95879	1.69435	1.92842	1.47455	1.95879	1.69435	1.92842	1.47455	1.03063	1.1092	0.931521	-0.102339	0.247314	0.569646	translational_only	0.522932	0.999545	-1	2	1	2	5271	165	2424	0.396889
uc007cvn.2	Nek7	ENSMUST00000186017	38.7876	97	20.2133	30	22.4037	61	23.3448	47	19.0213	217	16.5955	192	14.4401	227	12.7952	160	2.03917	1.218	1.55149	1.8245	2.03917	1.218	1.55149	1.8245	0.775387	0.764675	1.03648	0.0516947	-0.290114	0.503131	translational_only	0.965721	0.999713	-1	2	-1	2	4304	232	3163	0.388476
uc007cvu.2	Lhx9	ENSMUST00000112026	42.8286	142	33.1082	65	14.736	53	14.2565	38	25.5212	386	25.0055	383	7.9198	166	9.73569	162	1.67816	1.32404	1.86065	1.46435	1.67816	1.32404	1.86065	1.46435	0.381798	0.34943	1.10752	0.147338	-1.42129	6.71277e-14	both	0.82751	0.999545	1	2	-1	-1	2080	463	423	0.489423
uc007cwg.2	Zbtb41	ENSMUST00000039867	9.53604	73	7.28007	33	5.42359	45	8.78198	54	7.90803	277	6.99479	248	4.09745	198	5.12706	197	1.20587	1.04078	1.32365	1.71287	1.20587	1.04078	1.32365	1.71287	0.844759	0.618977	1.35157	0.434641	-0.601293	0.0105193	both	0.286717	0.999545	1	2	-1	-1	8362	158	5477	0.35769
uc007cwh.1	Aspm	ENSMUST00000053364	9.26645	245	8.94235	140	6.28129	180	5.60215	119	4.58785	555	4.29593	526	4.50846	753	3.61507	480	2.01978	2.08159	1.39322	1.54966	2.01978	2.08159	1.39322	1.54966	0.652621	0.914424	0.717538	-0.478874	-0.0295678	1	translational_only	0.027057	0.74125	-1	-1	-1	2	9866	159	338	0.437158
uc007cwx.2	Cdc73	ENSMUST00000018337	30.0744	134	25.7738	68	22.985	111	19.2795	69	14.5716	297	11.5816	239	11.4317	322	8.80786	197	2.06391	2.22541	2.01065	2.18889	2.06391	2.22541	2.01065	2.18889	0.756774	0.773883	0.97907	-0.0305157	-0.267796	0.701702	translational_only	0.687983	0.999545	-1	2	-1	2	7110	269	5245	0.349226
uc007cxa.1	Glrx2	ENSMUST00000129653	25.9224	33	11.9393	9	10.1465	14	11.7353	12	31.5763	184	27.8152	164	22.7391	183	23.4578	150	0.820944	0.429237	0.446216	0.500274	0.820944	0.429237	0.446216	0.500274	0.577942	0.777836	0.757082	-0.401478	-0.265721	0.618558	translational_only	0.154712	0.999545	-1	2	-1	2	3603	93	3039	0.273938
uc007cxd.1	Trove2	ENSMUST00000159879	13.0675	59	8.22885	22	9.80868	48	10.478	38	4.59671	95	3.97412	83	3.29535	94	2.64562	60	2.8428		2.97653		2.8428	2.07061	2.97653	3.9605	0.952588	0.693162	1.41186	0.497593	-0.42021	0.288669	translational_only	NA	NA	-1	2	-1	2	8720	152	6951	0.334174
uc007cxe.2	Uchl5	ENSMUST00000018333	35.0928	96	18.5393	30	27.9933	83	21.8445	48	16.5825	207	13.1426	166	25.3735	432	12.9616	177	2.11626	1.41063	1.10325	1.68532	2.11626	1.41063	1.10325	1.68532	0.929252	1.28966	0.790661	-0.338869	0.45579	0.482763	translational_only	0.102719	0.989559	-1	2	1	2	1851	123	738	0.376013
uc007cxv.2	Ptgs2	ENSMUST00000035065	59.7359	303	47.9437	144	116.426	639	93.863	382	36.4912	843	38.6327	901	62.6495	1991	66.1526	1677	1.63699	1.24101	1.85837	1.41889	1.63699	1.24101	1.85837	1.41889	1.95291	1.71453	1.13872	0.187419	0.874088	7.31231e-08	both	0.649788	0.999545	1	2	1	1	4460	193	2452	0.398206
uc007cxz.1	BC003331	ENSMUST00000111913	9.08432	34	5.86588	13	6.9024	28	9.31375	28	3.97222	68	2.71137	47	4.44111	105	2.34046	44			1.55421		2.28696	2.16344	1.55421	3.97945	1.08468	1.01466	1.24341	0.314299	0.133318	1	translational_only	NA	NA	-1	2	1	2	3242	388	1510	0.428131
uc007cyb.2	Tpr	ENSMUST00000124973	34.6804	711	28.8735	351	29.4362	654	26.5222	437	14.3965	1332	14.5391	1363	16.7929	2129	14.3251	1453	2.40894	1.98592	1.7529	1.85145	2.40894	1.98592	1.7529	1.85145	0.880487	1.07542	0.820127	-0.28608	0.195523	0.799761	translational_only	0.152147	0.999545	-1	2	1	2	7550	106	148	0.440795
uc007cyn.1	Ivns1abp	ENSMUST00000023918	29.4572	159	15.6438	50	26.1526	153	19.1437	83	19.6203	484	19.8806	497	28.0167	953	17.2795	468	1.50136	0.786887	0.933467	1.10788	1.50136	0.786887	0.933467	1.10788	1.00433	1.14671	0.892102	-0.16472	0.295919	0.694087	translational_only	0.389085	0.999545	-1	2	1	2	3513	504	1080	0.421292
uc007cyq.2	Swt1	ENSMUST00000064771	1.30776	10	1.54597	7	2.17265	18	2.27934	14	3.59982	126	4.17894	148	4.36648	211	3.5408	136	0.363284	0.369943	0.497575	0.643735	0.363284	0.369943	0.497575	0.643735	1.56006	1.01652	1.55656	0.638358	0.126964	1	translational_only	NA	NA	-1	2	1	2	3668	184	760	0.399128
uc007cyv.2	Trmt1l	ENSMUST00000065625	14.035	86	9.92187	36	10.9917	73	9.14283	45	16.8159	471	17.5287	497	13.9725	541	14.4322	444	0.834628	0.566035	0.786671	0.6335	0.834628	0.566035	0.786671	0.6335	0.84045	0.82705	1.01393	0.0199551	-0.175685	0.963387	translational_only	0.702361	0.999545	-1	2	-1	2	2665	229	249	0.469043
uc007cyx.1	Rnf2	ENSMUST00000076110	41.7757	117	24.1198	40	15.8128	48	13.7801	31	20.1252	258	22.2253	288	11.6915	207	11.9422	168	2.07579	1.08524	1.35251	1.15391	2.07579	1.08524	1.35251	1.15391	0.449088	0.558049	0.792909	-0.334773	-0.743146	0.000209919	both	0.178433	0.999545	-1	2	-1	-1	3028	107	1910	0.369221
uc007cyz.2	Fam129a	ENSMUST00000148810	4.99492	39	2.5955	12	12.6438	107	10.2046	64	2.46224	88	2.54407	92	4.27627	211	4.64057	182			2.95673	2.19901	2.02861	1.02022	2.95673	2.19901	3.01016	1.78112	1.69106	0.757924	0.926897	2.03387e-05	both	NA	NA	-1	2	1	1	3939	157	1001	0.50622
uc007czc.2	Edem3	ENSMUST00000059498	13.3752	105	16.7796	78	16.2188	138	16.3343	103	6.45626	232	6.98589	254	6.62929	329	7.1033	280	2.07166	2.40193	2.44654	2.29954	2.07166	2.40193	2.44654	2.29954	1.07953	1.02161	1.06091	0.0853025	0.126786	1	translational_only	0.859155	0.999545	1	2	1	2	6604	193	3615	0.429588
uc007czh.1	Rgl1	ENSMUST00000027760	35.7198	231	27.1585	104	9.84408	69	6.7378	35	26.2036	775	26.9353	805	6.51493	266	6.00561	195	1.36316	1.00829	1.511	1.12192	1.36316	1.00829	1.511	1.12192	0.263714	0.235619	1.11026	0.150894	-1.98402	5.8382e-32	both	0.825749	0.999545	1	2	-1	-1	3887	101	1479	0.487523
uc007czj.2	Arpc5	ENSMUST00000077755	80.8562	78	41.7567	27	27.9049	32	20.0034	18	179.898	410	157.341	402	54.8657	209	69.7064	209	0.449455	0.265389	0.508604	0.286967	0.449455	0.265389	0.508604	0.286967	0.390728	0.369388	1.11293	0.154361	-1.14781	2.62576e-09	both	0.839126	0.999545	-1	2	-1	-1	1897	183	1258	0.465472
uc007czp.2	Smg7	ENSMUST00000043560	20.0951	193	15.2933	87	14.0295	146	14.5137	112	11.6316	510	10.7391	477	7.80872	473	8.18392	394	1.72763	1.42407	1.79665	1.77344	1.72763	1.42407	1.79665	1.77344	0.806569	0.714891	1.13275	0.179826	-0.38766	0.0908726	translational_only	0.697994	0.999545	1	2	-1	2	5803	109	2277	0.478029
uc007czu.1	Lamc1	ENSMUST00000027752	64.1288	865	50.4971	404	81.5518	1188	78.051	846	19.6802	1210	21.4395	1336	35.0607	2937	30.1878	2023	3.25854	2.35533	2.32602	2.58552	3.25854	2.35533	2.32602	2.58552	1.39238	1.58679	0.874894	-0.19282	0.748247	1.82152e-05	both	0.331174	0.999545	-1	2	1	1	7622	247	2551	0.524665
uc007czy.1	Dhx9	ENSMUST00000042141	55.8903	653	40.4723	280	64.0742	811	51.9992	488	18.208	970	15.2719	824	28.7301	2102	21.8099	1275	3.06954	2.65012	2.23021	2.38419	3.06954	2.65012	2.23021	2.38419	1.20455	1.50956	0.806763	-0.309784	0.686923	0.00144493	both	0.118262	0.999545	-1	2	1	1	4613	150	311	0.408845
uc007dax.2	Ier5	ENSMUST00000055322	96.6565	245	94.0834	142	60.6769	168	53.6677	110	115.615	1304	129.033	1481	65.1818	1020	72.8638	907	0.836019	0.729141	0.930889	0.736547	0.836019	0.729141	0.930889	0.736547	0.599479	0.564261	1.06535	0.0913222	-0.7253	3.63109e-05	both	0.891018	0.999545	-1	2	-1	-1	3270	206	2137	0.523547
uc007dbb.1	Stx6	ENSMUST00000027743	34.071	72	27.1711	34	15.2809	35	11.1933	19	34.2187	331	35.9644	352	15.5155	207	13.566	144	0.995685	0.755501	0.984882	0.825104	0.995685	0.755501	0.984882	0.825104	0.432288	0.414366	1.03358	0.0476471	-1.1695	3.74948e-10	both	NA	NA	-1	2	-1	-1	2459	190	1501	0.537617
uc007dbe.1	BC034090	ENSMUST00000035914	7.77049	55	8.11224	34	2.08562	16	3.3419	19	9.36337	303	8.86046	290	2.23752	100	3.0377	108	0.829882	0.915556			0.829882	0.915556	0.93211	1.10014	0.341724	0.289469	1.16432	0.219489	-1.69993	3.44939e-16	both	NA	NA	-1	2	-1	-1	3799	227	1049	0.575415
uc007dbf.1	Xpr1	ENSMUST00000027741	11.458	67	8.95304	31	7.57361	48	7.23877	34	5.52939	148	5.5017	149	3.70607	137	3.91531	115	2.07219	1.62732	2.04357	1.84884	2.07219	1.62732	2.04357	1.84884	0.725706	0.6909	1.05214	0.0733249	-0.437492	0.11813	translational_only	NA	NA	-1	2	-1	2	7651	210	5353	0.436675
uc007dbp.1	Qsox1	ENSMUST00000035325	119.893	755	88.499	330	91.1313	622	86.1961	436	144.7	4156	157.423	4579	107.292	4254	105.703	3339	0.828562	0.562173	0.849379	0.815459	0.828562	0.562173	0.849379	0.815459	0.850931	0.70499	1.19709	0.259535	-0.40574	0.0323607	both	0.715959	0.999545	1	2	-1	-1	3361	100	1014	0.554894
uc007dbs.2	Cep350	ENSMUST00000138762	8.12482	213	9.21184	143	4.78632	136	5.65112	119	3.71705	446	3.58262	435	2.37207	393	2.12677	280	2.18582	2.57126	2.01778	2.65713	2.18582	2.57126	2.01778	2.65713	0.602045	0.616308	0.982727	-0.0251372	-0.598654	0.0022641	both	0.637386	0.999545	-1	2	-1	-1	13307	420	3599	0.46344
uc007dbw.2	Tor1aip1	ENSMUST00000097527	34.7488	168	34.2321	98	26.9079	141	27.5852	107	35.6841	786	38.0934	844	20.5364	624	24.6162	595	0.973792	0.898636	1.31025	1.12061	0.973792	0.898636	1.31025	1.12061	0.789973	0.612012	1.29824	0.376558	-0.608978	0.00162701	both	0.386128	0.999545	1	2	-1	-1	4302	245	2326	0.403998
uc007dbx.2	Tor1aip2	ENSMUST00000111757	24.3126	102	17.6998	44	16.4495	75	18.1015	61	8.99298	172	8.86255	170	6.59616	174	7.19945	151	2.70351	1.99714	2.4938	2.51429	2.70351	1.99714	2.4938	2.51429	0.8224	0.772624	1.0654	0.0913985	-0.272389	0.59559	translational_only	0.861715	0.999545	1	2	-1	2	5855	945	3401	0.426132
uc007dcj.1	Soat1	ENSMUST00000189661	43.0274	195	28.3205	76	24.837	122	18.9545	69	20.1623	418	21.9152	460	9.84899	282	9.31866	212	2.13405	1.29227	2.52178	2.03404	2.13405	1.29227	2.52178	2.03404	0.613775	0.455531	1.32965	0.411051	-1.03516	7.81794e-09	both	0.141274	0.999545	1	2	-1	-1	4785	211	2951	0.399164
uc007dcl.2	Abl2	ENSMUST00000166172	19.8893	198	23.8922	141	16.7369	181	17.0029	136	8.39494	382	8.29683	382	5.31924	334	6.36483	318	2.3692	2.87968	3.14649	2.67138	2.3692	2.87968	3.14649	2.67138	0.770641	0.69999	1.1084	0.148482	-0.420455	0.084503	translational_only	0.61787	0.999545	1	2	-1	2	10714	262	6903	0.482266
uc007dcn.2	Tor3a	ENSMUST00000079625	20.2081	65	13.6509	26	6.59735	23	6.57983	17	19.918	293	20.272	302	7.87545	160	7.55106	122	1.01457	0.673388	0.837711	0.871379	1.01457	0.673388	0.837711	0.871379	0.389178	0.38384	1.01252	0.0179513	-1.28139	6.95916e-12	both	NA	NA	-1	2	-1	-1	3268	34	2076	0.47093
uc007dcp.1	Fam20b	ENSMUST00000086153	18.7123	64	12.838	26	11.3299	42	16.38	45	19.8815	311	19.9184	315	9.57366	207	9.25507	159	0.94119	0.644529	1.18344	1.76984	0.94119	0.644529	1.18344	1.76984	0.878276	0.473085	1.86242	0.89718	-0.978761	1.45241e-07	both	0.0155825	0.605204	1	1	-1	-1	4238	168	2840	0.448089
uc007ddg.2	Rasal2	ENSMUST00000078308	14.3716	156	11.3574	73	8.92018	105	7.56379	66	6.56802	326	6.96915	350	4.30345	295	4.1299	225	2.18812	1.62967	2.07279	1.83147	2.18812	1.62967	2.07279	1.83147	0.640675	0.622977	1.02265	0.0323122	-0.583503	0.00354603	both	0.910294	0.999545	-1	2	-1	-1	10046	657	5528	0.442962
uc007ddi.1	2810025M15Rik	ENSMUST00000061537	22.563	18	13.0586	7	9.49918	9	4.17793	3	57.188	137	51.1521	126	36.8648	149	24.8553	83	0.394541	0.25529	0.257676		0.394541	0.25529	0.257676	0.16809	0.383955	0.569688	0.655195	-0.610003	-0.401673	0.315845	translational_only	NA	NA	-1	2	-1	2	1194	492	348	0.571189
uc007ddn.2	Sec16b	ENSMUST00000111700	4.96122	44	6.47427	34	1.6645	16	2.10562	15	6.109	248	6.64624	273	2.46136	138	2.28966	102	0.812116	0.974126	0.676253		0.812116	0.974126	0.676253	0.919621	0.329686	0.372476	0.893425	-0.162581	-1.32311	8.11905e-12	both	NA	NA	-1	2	-1	-1	4348	115	1077	0.51104
uc007dee.2	Tnn	ENSMUST00000039178	0.075823	1	0.128104	1	5.75869	82	6.24891	66	0.248898	15	0.311185	19	5.10229	414	4.94981	322			1.12865	1.26245	0.304635	0.411665	1.12865	1.26245	58.8819	17.9475	3.33813	1.73904	4.22248	1.13898e-65	both	NA	NA	-1	2	1	1	5809	127	999	0.535032
uc007def.1	Mrps14	ENSMUST00000135680	20.9301	18	12.3632	7	13.8782	14	15.3069	12	67.0889	139	66.56	150	49.1608	131	37.5067	97	0.311976	0.185745	0.282303		0.311976	0.185745	0.282303	0.408112	0.876608	0.648471	1.38715	0.472126	-0.547308	0.0285342	both	NA	NA	-1	2	-1	-1	1970	7	1576	0.208629
uc007deg.2	Cacybp	ENSMUST00000014370	41.4295	62	25.5702	26	43.2089	73	22.0773	30	72.0926	295	65.0152	299	117.876	468	82.1023	357	0.57467	0.393296	0.366561	0.2689	0.57467	0.393296	0.366561	0.2689	0.974427	1.45855	0.656492	-0.607151	0.267935	0.447262	translational_only	0.294957	0.999545	-1	2	1	2	2115	225	1200	0.407092
uc007dej.2	Rabgap1l	ENSMUST00000028049	5.24331	36	3.9355	16	4.16576	31	4.53311	25	2.16458	68	2.16985	69	2.35192	102	1.76876	61			1.77122		2.42232	1.81372	1.77122	2.56288	0.947712	0.950684	1.02315	0.0330147	0.0365425	1	translational_only	NA	NA	-1	2	1	2	3373	245	680	0.412393
uc007del.2	Rc3h1	ENSMUST00000161609	13.3292	127	12.042	68	10.5518	109	12.1373	93	7.25631	316	6.82704	301	5.94707	358	6.67533	319	1.83691	1.76387	1.77429	1.81823	1.83691	1.76387	1.77429	1.81823	0.894285	0.896264	0.997705	-0.00331467	-0.0625451	1	translational_only	0.754337	0.999545	-1	2	-1	2	11011	439	7179	0.393879
uc007dey.2	Dars2	ENSMUST00000035430	6.00982	33	4.61334	15	5.04078	30	6.1216	27	8.39485	211	7.54964	192	6.97146	242	5.43844	150	0.715894	0.611067	0.72306	1.12562	0.715894	0.611067	0.72306	1.12562	1.05076	0.778319	1.39317	0.478367	-0.257689	0.708504	translational_only	0.446787	0.999545	1	2	-1	2	3621	544	1115	0.401823
uc007dff.1	Klhl20	ENSMUST00000111611	14.1868	72	10.3155	31	10.9076	60	6.8685	28	3.40064	79	3.78633	89	3.67785	118	2.19672	56	4.17179		2.96577		4.17179	2.7244	2.96577	3.12671	0.725491	0.817391	0.883456	-0.178769	-0.176909	1	translational_only	NA	NA	-1	2	-1	2	4037	173	2049	0.397325
uc007dft.2	Suco	ENSMUST00000048377	7.55314	80	6.53728	41	5.83635	67	8.34544	71	4.91036	238	4.46555	219	4.8265	323	4.1363	220	1.53821	1.46394	1.20923	2.01761	1.53821	1.46394	1.20923	2.01761	1.00648	0.955939	1.07485	0.10413	0.0356692	1	translational_only	0.849028	0.999545	-1	2	1	2	6308	289	2254	0.393627
uc007dfy.1	Pigc	ENSMUST00000111594	13.362	33	9.57333	14	7.47168	20	4.03276	8	25.9185	293	26.5773	304	9.50118	148	10.2376	127	0.515541	0.360208	0.786395	0.393916	0.515541	0.360208	0.786395	0.393916	0.501602	0.376007	1.34777	0.430577	-1.31703	2.41911e-12	both	NA	NA	-1	2	-1	-1	3288	303	2091	0.418187
uc007dgh.1	Mettl13	ENSMUST00000028017	15.6651	92	14.0902	49	17.438	111	15.2627	72	12.7281	342	15.235	414	13.4802	500	12.317	363	1.23075	0.92486	1.29361	1.23915	1.23075	0.92486	1.29361	1.23915	1.09899	0.922544	1.17496	0.232615	-0.0171259	1	translational_only	0.665964	0.999545	1	2	-1	2	2790	89	604	0.475986
uc007dgl.1	Vamp4	ENSMUST00000050010	24.4386	28	8.84394	6	9.66337	12	8.69284	8	33.9175	177	31.2827	166	10.907	79	13.2059	76	0.72053	0.28271			0.72053	0.28271	0.885977	0.658255	0.551527	0.369829	1.53924	0.622222	-1.34119	1.01582e-09	both	NA	NA	-1	2	-1	-1	2532	105	2001	0.374013
uc007dgr.1	Prrc2c	ENSMUST00000182660	33.3645	792	35.8151	506	44.6353	1141	45.3853	863	14.2157	1508	14.1095	1510	21.8997	3107	19.5704	2252	2.34702	2.53837	2.03817	2.31908	2.34702	2.53837	2.03817	2.31908	1.30126	1.46407	0.891895	-0.165055	0.617714	0.000314688	both	0.363373	0.999545	-1	2	1	1	10444	286	1617	0.439583
uc007dhi.1	Prrx1	ENSMUST00000027878	229.249	465	209.272	251	89.985	197	71.297	116	108.355	992	104.634	972	34.8007	445	36.9091	375	2.11572	2.00004	2.58573	1.93169	2.11572	2.00004	2.58573	1.93169	0.367787	0.336684	1.09759	0.134337	-1.45954	3.26766e-19	both	0.822718	0.999545	1	2	-1	-1	4892	1015	3139	0.392069
uc007dhl.2	Gorab	ENSMUST00000045138	12.3688	38	10.9938	20	6.60686	22	5.67316	14	19.3417	272	16.9371	241	6.4419	125	6.48006	100	0.639487	0.6491	1.02561		0.639487	0.6491	1.02561	0.875479	0.525626	0.356185	1.47533	0.561033	-1.39172	3.27477e-12	both	NA	NA	-1	2	-1	-1	2543	86	1350	0.440818
uc007dhu.1	BC055324	ENSMUST00000045876	9.72056	74	5.76778	26	6.66826	55	4.7443	29	9.41905	327	9.40139	330	8.28613	397	7.22655	275	1.03201	0.613504	0.80475	0.65651	1.03201	0.613504	0.80475	0.65651	0.736848	0.824246	0.888026	-0.171326	-0.179208	1	translational_only	0.381989	0.999545	-1	2	-1	2	2910	61	137	0.453952
uc007dig.1	Blzf1	ENSMUST00000027866	7.87471	27	7.88074	16	6.1891	23	6.89886	19	5.67079	89	6.5491	104	5.49461	119	4.93543	85			1.1264		1.38864	1.20333	1.1264	1.39782	0.830695	0.85353	0.973859	-0.0382152	-0.12676	1	translational_only	NA	NA	-1	2	-1	2	3948	289	2426	0.369554
uc007diz.2	Tiprl	ENSMUST00000043235	34.0327	75	21.1583	28	18.3271	44	12.2398	22	33.4887	317	33.2152	319	22.062	290	20.0801	216	1.01625	0.637005	0.830708	0.609545	1.01625	0.637005	0.830708	0.609545	0.553837	0.631779	0.871164	-0.198983	-0.536636	0.0100029	both	0.321313	0.999545	-1	2	-1	-1	4395	125	3454	0.349716
uc007dja.2	Gpr161	ENSMUST00000111450	8.53833	40	7.57022	21	4.72665	24	6.3779	24	5.45609	117	5.71495	124	3.64668	108	3.35719	79	1.56492	1.32464	1.29615		1.56492	1.32464	1.29615	1.89977	0.689357	0.626966	1.10603	0.145388	-0.571354	0.0276329	both	NA	NA	-1	2	-1	-1	6837	116	5044	0.472429
uc007djb.2	Dcaf6	ENSMUST00000027856	12.2361	90	10.0909	44	5.64254	45	4.3923	26	15.0227	491	14.0847	468	6.10549	278	4.70798	172	0.814506	0.716441	0.924175	0.932947	0.814506	0.716441	0.924175	0.932947	0.44945	0.371503	1.21305	0.278644	-1.30932	8.52576e-12	both	0.672524	0.999545	1	2	-1	-1	3305	236	438	0.46112
uc007djd.1	Mpc2	ENSMUST00000027853	38.0204	37	23.345	14	15.7064	17	17.2096	14	75.6863	246	62.0482	213	37.4239	170	38.2914	148	0.502342	0.37624	0.419689	0.449438	0.502342	0.37624	0.419689	0.449438	0.536394	0.549719	0.989238	-0.01561	-0.728489	0.000906813	both	NA	NA	-1	2	-1	-1	854	195	275	0.502342
uc007djh.1	Mpzl1	ENSMUST00000111435	29.9036	67	33.1648	44	21.4131	52	16.1138	29	27.2041	279	29.5254	306	16.9442	240	14.3946	162	1.09923	1.12326	1.26375	1.11944	1.09923	1.12326	1.26375	1.11944	0.595021	0.552423	1.0723	0.100715	-0.752454	0.000215288	both	0.98203	0.999713	-1	2	-1	-1	2356	148	1395	0.500424
uc007djm.1	Creg1	ENSMUST00000111432	12.1133	22	10.2284	11	9.14407	18	4.11285	6	19.9677	166	19.4966	164	6.09673	70	10.6327	97	0.606641	0.524623			0.606641	0.524623	1.49983	0.38681	0.593373	0.423913	1.66773	0.737885	-1.15695	4.01303e-05	both	NA	NA	-1	2	-1	-1	2125	5	1457	0.435765
uc007djz.2	Pou2f1	ENSMUST00000160260	5.71385	37	6.51994	25	8.54885	60	7.88251	41	2.46282	73	2.60076	78	3.37107	138	4.15046	135			2.53595	1.89919	2.32004	2.50694	2.53595	1.89919	1.34311	1.48542	0.918821	-0.122144	0.660643	0.0127113	both	NA	NA	-1	2	1	1	12906	12	10584	0.434991
uc007dkm.2	Tada1	ENSMUST00000027846	27.577	77	14.5159	24	5.61738	17	3.56697	8	25.4286	325	26.0593	337	6.515	115	7.77174	109	1.08449	0.557032	0.862222		1.08449	0.557032	0.862222	0.458967	0.218193	0.277477	0.804857	-0.313195	-1.7576	5.09058e-20	both	NA	NA	-1	2	-1	-1	2144	236	900	0.441231
uc007dku.2	Uck2	ENSMUST00000053686	87.4365	187	68.2471	87	93.0594	216	81.969	141	86.1994	826	83.3546	806	66.6133	878	77.3439	810	1.01435	0.818756	1.39701	1.0598	1.01435	0.818756	1.39701	1.0598	1.12426	0.849035	1.34024	0.422493	-0.143946	1	translational_only	0.287337	0.999545	1	2	-1	2	1337	253	298	0.564697
uc007dkv.1	Tmco1	ENSMUST00000097473	98.4066	152	62.3206	57	62.1216	104	53.1959	66	118.742	838	130.938	935	72.6699	707	86.6135	672	0.828745	0.475955	0.854847	0.614175	0.828745	0.475955	0.854847	0.614175	0.717474	0.63795	1.12595	0.171139	-0.552097	0.00569008	both	0.89167	0.999545	1	2	-1	-1	4474	194	3713	0.340188
uc007dkx.1	Aldh9a1	ENSMUST00000028004	20.0217	87	11.6595	30	14.4384	68	12.0333	42	17.1443	341	17.1762	345	12.3488	339	10.6293	232	1.16784	0.678815	1.16922	1.13209	1.16784	0.678815	1.16922	1.13209	0.835566	0.669516	1.2462	0.317537	-0.476745	0.0321436	both	0.46624	0.999545	1	2	-1	-1	2833	245	1031	0.472644
uc007dky.1	Mgst3	ENSMUST00000028005	80.8975	92	50.8056	36	51.9033	67	27.3779	27	219.813	871	219.363	868	75.5116	447	85.7866	423	0.368029	0.231605	0.687356	0.31914	0.368029	0.231605	0.687356	0.31914	0.601969	0.367275	1.67852	0.747186	-1.19062	7.2169e-12	both	0.215407	0.999545	1	2	-1	-1	635	54	119	0.537008
uc007dlj.1	Nuf2	ENSMUST00000111368	32.2289	125	14.369	33	21.8853	92	16.3704	51	16.3468	290	15.8657	285	23.077	565	11.6175	226	1.97157	0.905665	0.948361	1.40911	1.97157	0.905665	0.948361	1.40911	0.820975	1.07705	0.819353	-0.287442	0.207881	1	translational_only	0.192521	0.999545	-1	2	1	2	2405	158	855	0.395842
uc007dlp.1	Hsd17b7	ENSMUST00000027989	23.7095	66	10.9201	18	11.6005	35	11.1808	25	7.45563	95	8.2217	106	2.89807	51	3.2183	45	3.18008				3.18008	1.32821	4.00282	3.47412	0.657854	0.390141	1.65849	0.729871	-1.26383	6.14545e-07	both	NA	NA	-1	2	-1	-1	4574	73	3496	0.370136
uc007dma.1	Uhmk1	ENSMUST00000027979	17.4033	61	12.5372	26	10.8185	41	13.1951	37	10.0129	160	8.77551	142	5.29299	117	5.18541	91	1.73808	1.42866	2.04393	2.54466	1.73808	1.42866	2.04393	2.54466	0.802044	0.557705	1.44899	0.535049	-0.741966	0.00146136	both	NA	NA	-1	2	-1	-1	2024	153	611	0.503458
uc007dmi.2	Olfml2b	ENSMUST00000046792	20.6997	130	16.1342	60	46.4233	316	45.0189	227	29.565	848	31.5828	917	55.6368	2194	62.5046	1962	0.700141	0.510855	0.8344	0.72025	0.700141	0.510855	0.8344	0.72025	2.48256	1.93206	1.28378	0.360396	1.04182	2.0531e-10	both	0.551615	0.999545	1	2	1	1	3095	390	464	0.521163
uc007dmj.1	Atf6	ENSMUST00000027974	17.9463	99	12.8577	42	26.5928	159	24.3734	108	9.08292	229	9.1978	235	12.1706	424	13.4596	372	1.97582	1.39791	2.18501	1.81085	1.97582	1.39791	2.18501	1.81085	1.65453	1.40203	1.1844	0.244161	0.581619	0.00414893	both	0.429163	0.999545	1	2	1	1	7463	70	5422	0.411765
uc007dml.1	Dusp12	ENSMUST00000027970	12.0306	34	11.9513	20	11.4263	35	8.81031	20	44.8801	580	43.7	572	22.8262	407	25.8529	367	0.268061	0.273484	0.500578	0.340786	0.268061	0.273484	0.500578	0.340786	0.843829	0.549549	1.55364	0.635648	-0.768813	2.56065e-05	both	0.336199	0.999545	1	2	-1	-1	1374	133	221	0.521106
uc007dnb.2	Sdhc	ENSMUST00000111336	167.707	232	113.533	93	75.3654	113	64.7963	72	224.395	1418	211.018	1352	88.619	775	109.021	756	0.747377	0.538028	0.850443	0.594346	0.747377	0.538028	0.850443	0.594346	0.498369	0.453915	1.12399	0.168635	-1.04404	3.28333e-09	both	0.951642	0.999545	1	2	-1	-1	1179	25	644	0.474979
uc007dnj.1	Tomm40l	ENSMUST00000005817	19.5081	50	18.4493	28	10.4393	29	6.31454	13	52.4513	614	47.8173	567	25.7978	418	26.2541	338	0.371928	0.385828	0.40466	0.240516	0.371928	0.385828	0.40466	0.240516	0.441386	0.519124	0.851429	-0.232041	-0.846163	2.03139e-06	both	0.287859	0.999545	-1	2	-1	-1	2920	275	1718	0.526712
uc007dnm.2	Ndufs2	ENSMUST00000013737	63.8832	240	48.4622	110	57.9747	235	48.2452	148	76.6311	1162	87.5669	1355	148.335	2812	59.4107	1008	0.833645	0.55343	0.390837	0.812063	0.833645	0.55343	0.390837	0.812063	0.945477	1.26521	0.86722	-0.20553	0.340149	0.895518	translational_only	0.207328	0.999545	-1	2	1	2	1623	34	197	0.536661
uc007dnp.2	B4galt3	ENSMUST00000064272	10.6198	35	6.149	12	8.11847	29	7.55493	20	19.0235	286	13.4532	205	10.7679	223	12.3366	203	0.558246	0.457067	0.753953	0.612399	0.558246	0.457067	0.753953	0.612399	0.934678	0.711419	1.34574	0.428404	-0.401688	0.267363	translational_only	0.495523	0.999545	1	2	-1	2	1998	294	516	0.565566
uc007dns.1	Ppox	ENSMUST00000073120	5.50369	22	3.80233	9	3.92382	17	3.73737	12	13.8272	253	14.9726	277	9.2995	235	10.5087	211	0.398033	0.253953	0.421939	0.355645	0.398033	0.253953	0.421939	0.355645	0.823251	0.687791	1.19264	0.254155	-0.444637	0.0658295	translational_only	0.918218	0.999545	1	2	-1	2	1821	322	65	0.566172
uc007dnw.1	Ufc1	ENSMUST00000080001	40.7584	55	18.6164	15	27.9742	41	17.456	19	80.2566	450	77.0388	430	51.1115	383	60.7622	373	0.507852	0.24165	0.547318	0.287284	0.507852	0.24165	0.547318	0.287284	0.765143	0.711234	1.11354	0.155156	-0.40923	0.100161	translational_only	0.998847	0.999801	-1	2	-1	2	964	133	327	0.508299
uc007dnx.2	Dedd	ENSMUST00000111300	22.8794	60	15.4888	24	11.9362	34	9.4946	20	24.47	263	22.614	248	11.9914	181	12.5957	155	0.934999	0.684923	0.995395	0.753797	0.934999	0.684923	0.995395	0.753797	0.558555	0.522197	1.0798	0.110764	-0.804284	6.55035e-05	both	0.930681	0.999545	-1	2	-1	-1	2700	446	1297	0.512963
uc007doa.2	Nit1	ENSMUST00000111289	10.4076	28	9.41586	15	5.48709	16	5.09025	11	18.1084	223	18.7994	234	7.87877	134	9.33374	126	0.574739	0.500861	0.69644	0.54536	0.574739	0.500861	0.69644	0.54536	0.533576	0.466365	1.15452	0.207291	-1.00819	8.92388e-07	both	NA	NA	-1	2	-1	-1	1342	76	294	0.506706
uc007doc.1	Pfdn2	ENSMUST00000135941	68.4986	81	45.6016	33	37.0086	48	29.4059	29	52.4704	248	51.4256	252	74.445	454	45.5575	246	1.30547	0.886747	0.497127	0.645468	1.30547	0.886747	0.497127	0.645468	0.582072	1.15502	0.521205	-0.940077	0.256302	0.839383	translational_only	0.00109528	0.256785	-1	-1	1	2	622	13	144	0.482315
uc007doo.1	F11r	ENSMUST00000043839	5.21012	13	1.35366	2	36.6074	99	25.9455	52	1.92624	22	1.21146	14	17.9412	283	12.5268	157			2.04041	2.0712	2.70482	1.11738	2.04041	2.0712	9.52999	9.71029	1.07572	0.1053	3.3758	3.85574e-28	both	NA	NA	-1	2	1	1	2482	80	1499	0.486301
uc007dpk.2	Ncstn	ENSMUST00000003550	52.5363	313	41.952	148	51.5689	333	46.8076	224	40.1891	1096	44.7931	1236	35.3557	1331	41.235	1234	1.30723	0.936574	1.45857	1.13514	1.30723	0.936574	1.45857	1.13514	1.04115	0.901256	1.15595	0.209076	-0.0533188	1	translational_only	0.674613	0.999545	1	2	-1	2	2855	67	661	0.515236
uc007dpn.2	Copa	ENSMUST00000135192	126.922	1312	99.0042	606	80.0619	897	74.5502	619	74.4303	3516	74.9641	3588	48.4245	3161	47.8724	2485	1.70525	1.32069	1.65333	1.55727	1.70525	1.32069	1.65333	1.55727	0.684347	0.644582	1.06103	0.0854605	-0.535497	0.00160937	both	0.973396	0.999713	1	2	-1	-1	4629	381	573	0.49946
uc007dpq.2	Pex19	ENSMUST00000111252	41.8232	104	28.524	42	19.2938	52	18.5242	37	32.4925	369	32.1631	370	15.4755	243	21.9367	274	1.28717	0.886853	1.24673	0.84444	1.28717	0.886853	1.24673	0.84444	0.53759	0.578638	0.961889	-0.0560579	-0.696014	0.00303044	both	0.602216	0.999545	-1	2	-1	-1	3131	24	2207	0.452252
uc007dpu.2	Dcaf8	ENSMUST00000074144	35.6508	177	29.9333	88	20.8134	112	18.8066	75	30.0269	682	29.9977	689	18.0641	566	15.4557	385	1.1873	0.997854	1.1522	1.21681	1.1873	0.997854	1.1522	1.21681	0.60411	0.558433	1.08414	0.116552	-0.741278	4.86374e-05	both	0.999611	0.999801	1	2	-1	-1	3743	246	1721	0.520171
uc007dpy.1	Pea15a	ENSMUST00000013842	122.908	121	49.6093	30	48.1486	53	38.3716	32	89.8962	376	73.7149	311	28.7753	176	44.7271	218	1.36722	0.672989	1.67326	0.857905	1.36722	0.672989	1.67326	0.857905	0.501517	0.449251	1.24064	0.311085	-0.977797	0.000153142	both	0.529317	0.999545	1	2	-1	-1	2477	187	1897	0.47396
uc007dqe.2	Igsf8	ENSMUST00000039506	39.1465	201	45.3891	138	28.5708	159	26.4287	109	84.628	1989	90.551	2151	41.6203	1348	45.0903	1161	0.462571	0.501255	0.686463	0.58613	0.462571	0.501255	0.686463	0.58613	0.650608	0.494983	1.32036	0.400926	-0.919162	1.29083e-08	both	0.540614	0.999545	1	2	-1	-1	2280	169	275	0.620175
uc007dqk.2	Pigm	ENSMUST00000052455	13.8456	49	18.1333	38	13.8172	53	19.3478	55	14.0745	228	15.0082	246	7.91134	177	9.61939	171	0.983736	1.20822	1.74651	2.01133	0.983736	1.20822	1.74651	2.01133	1.03709	0.602789	1.71438	0.777684	-0.637922	0.0045205	both	0.0172001	0.617355	1	1	-1	-1	7569	168	6129	0.270049
uc007dqp.1	Tagln2	ENSMUST00000111230	824.192	1350	595.935	578	517.187	915	410.278	537	763.909	5589	768.721	5731	350.816	3526	432.08	3469	1.07891	0.775229	1.47424	0.949541	1.07891	0.775229	1.47424	0.949541	0.653086	0.510819	1.30722	0.386506	-0.880644	4.7042e-07	both	0.328368	0.999545	1	2	-1	-1	1382	115	667	0.524602
uc007dtf.1	Grem2	ENSMUST00000055294	37.9779	52	39.3064	32	71.5749	106	67.2842	74	12.9776	81	14.598	92	20.5572	175	20.2324	138	2.92642		3.48174	3.32557	2.92642	2.69259	3.48174	3.32557	1.79673	1.47919	1.21148	0.276768	0.651545	0.00813782	both	NA	NA	-1	2	1	1	3745	248	2990	0.474232
uc007dtn.2	Fh1	ENSMUST00000027810	69.1189	289	47.9812	120	37.3861	170	32.9248	112	58.8326	1078	66.175	1213	62.3202	1518	35.4083	719	1.17484	0.725065	0.599904	0.929859	1.17484	0.725065	0.599904	0.929859	0.600434	0.78178	0.805179	-0.312618	-0.275866	0.81276	translational_only	0.136676	0.999545	-1	2	-1	2	1632	62	46	0.492034
uc007dtu.2	Exo1	ENSMUST00000039725	14.7463	104	9.57827	40	9.15752	70	9.17926	52	14.1873	458	15.7359	514	13.6029	606	11.1785	396	1.03941	0.608689	0.673202	0.821157	1.03941	0.608689	0.673202	0.821157	0.753837	0.828167	0.906719	-0.141273	-0.172071	1	translational_only	0.386702	0.999545	-1	2	-1	2	5506	161	2831	0.420814
uc007duk.2	Akt3	ENSMUST00000111160	7.98276	32	7.9932	19	4.59674	20	3.1013	10	6.57231	120	6.98762	129	3.41046	86	3.88199	78	1.21461	1.14391			1.21461	1.14391	1.34783	0.798896	0.481851	0.537794	0.910205	-0.135737	-0.799681	0.000941182	both	NA	NA	-1	2	-1	-1	4735	46	3249	0.420908
uc007dun.2	Zbtb18	ENSMUST00000094276	6.73308	30	7.20149	19	6.41924	31	12.853	46	7.25666	148	7.90376	163	6.68287	188	5.76758	129	0.927848	0.911148	0.960551	2.22849	0.927848	0.911148	0.960551	2.22849	1.38305	0.821247	1.73412	0.794203	-0.18233	1	translational_only	NA	NA	-1	2	-1	2	3838	149	2093	0.422876
uc007dut.1	Adss	ENSMUST00000016105	66.7055	254	47.4204	107	54.3969	224	38.8782	119	38.6411	671	35.8828	630	35.8712	859	26.1598	497	1.72628	1.32154	1.51645	1.48618	1.72628	1.32154	1.51645	1.48618	0.817299	0.832364	0.985173	-0.0215504	-0.167114	1	translational_only	0.69865	0.999545	-1	2	-1	2	2553	115	1067	0.426949
uc007dux.1	Desi2	ENSMUST00000027783	28.456	45	16.9955	16	25.534	44	20.3232	26	12.2952	89	15.8663	116	12.5154	124	10.1439	80	2.31441	1.07117	2.0402		2.31441	1.07117	2.0402	2.00348	1.00893	0.804624	1.19439	0.256268	-0.218175	1	translational_only	NA	NA	-1	2	-1	2	4213	499	3129	0.443152
uc007dvo.1	Cnst	ENSMUST00000040706	12.3679	74	12.4191	44	8.32694	54	6.03412	29	7.41211	203	7.07288	196	4.91741	186	3.59354	108	1.6686	1.75588	1.69336	1.67916	1.6686	1.75588	1.69336	1.67916	0.579379	0.58757	0.984825	-0.0220603	-0.659903	0.00748497	both	NA	NA	-1	2	-1	-1	4545	140	2269	0.50253
uc007dvp.1	Sccpdh	ENSMUST00000040538	18.1061	65	10.8197	23	12.0792	47	9.71008	28	27.1017	445	30.4928	507	17.6692	401	16.5258	298	0.66808	0.354829	0.683631	0.58757	0.66808	0.354829	0.683631	0.58757	0.753282	0.59372	1.24273	0.313515	-0.652141	0.000662315	both	0.622454	0.999545	1	2	-1	-1	1922	125	507	0.467742
uc007dvw.2	Cdc42bpa	ENSMUST00000111117	20.2149	296	21.2254	184	13.3658	212	14.961	176	14.5963	977	15.6187	1058	11.6054	1072	10.8173	795	1.38493	1.35897	1.15169	1.38307	1.38493	1.35897	1.15169	1.38307	0.683558	0.7421	0.923781	-0.114377	-0.33211	0.147955	translational_only	0.39205	0.999545	-1	2	-1	2	8656	21	3436	0.456215
uc007dwd.2	Psen2	ENSMUST00000111108	10.3967	39	7.65341	17	6.64083	27	7.96516	24	11.9077	204	14.8019	256	8.93128	211	8.62367	162	0.873108	0.517057	0.743548	0.923638	0.873108	0.517057	0.743548	0.923638	0.809192	0.657254	1.19927	0.262159	-0.505974	0.039687	both	0.729028	0.999545	1	2	-1	-1	1997	81	569	0.557837
uc007dwg.1	Itpkb	ENSMUST00000070181	10.0744	80	13.3935	63	6.38804	55	9.24659	59	6.43997	234	6.63435	244	2.82865	142	2.91131	116	1.56436	2.01881	2.25833	3.17609	1.56436	2.01881	2.25833	3.17609	0.666213	0.439026	1.51665	0.600892	-1.09068	2.79816e-08	both	NA	NA	-1	2	-1	-1	5101	503	1769	0.568516
uc007dwi.1	Parp1	ENSMUST00000027777	50.6324	431	43.2354	218	43.1159	397	35.6342	243	40.2785	1523	38.8687	1483	38.0374	1968	31.3951	1300	1.25706	1.11234	1.13351	1.13502	1.25706	1.11234	1.13351	1.13502	0.838947	0.877258	0.95743	-0.0627612	-0.0972257	1	translational_only	0.545597	0.999545	-1	2	-1	2	3827	59	723	0.525216
uc007dwq.2	Acbd3	ENSMUST00000027780	42.9088	189	27.6054	72	20.1087	96	21.7635	77	14.8891	300	13.6272	278	8.73234	243	7.42202	164	2.8819	2.02575	2.30279	2.93229	2.8819	2.02575	2.30279	2.93229	0.593813	0.566496	1.06672	0.0931777	-0.718471	0.000562308	both	0.933986	0.999545	1	2	-1	-1	3471	59	1834	0.435321
uc007dwt.1	Sde2	ENSMUST00000038091	25.0586	94	18.008	40	18.2008	74	11.9477	36	6.58098	113	7.25233	126	7.7227	183	5.57256	105	3.80773	2.48306	2.35679	2.14403	3.80773	2.48306	2.35679	2.14403	0.700043	0.961104	0.715461	-0.483055	0.0491658	1	translational_only	NA	NA	-1	2	1	2	3190	22	1821	0.391536
uc007dwv.2	Pycr2	ENSMUST00000027802	71.3808	188	54.6742	86	43.9973	126	40.9044	87	97.2929	1149	102.461	1223	59.2841	968	68.3081	893	0.733669	0.533609	0.742143	0.598822	0.733669	0.533609	0.742143	0.598822	0.673529	0.638747	1.05814	0.0815373	-0.541839	0.0041328	both	0.81525	0.999545	-1	2	-1	-1	1599	190	446	0.588493
uc007dwx.1	Tmem63a	ENSMUST00000027800	44.0013	298	39.8975	160	34.3591	252	25.93	141	39.7146	1225	43.0215	1341	27.3945	1167	32.0067	1082	1.10794	0.927385	1.25423	0.810142	1.10794	0.927385	1.25423	0.810142	0.718594	0.717961	1.01428	0.0204489	-0.381271	0.0869149	translational_only	0.730746	0.999545	-1	2	-1	2	3239	56	768	0.539055
uc007dwz.2	Ephx1	ENSMUST00000036928	111.907	422	85.2171	191	17.9838	74	14.7346	45	103.688	1724	113.681	1914	19.3002	457	17.6997	333	1.07926	0.749613	0.931793	0.832482	1.07926	0.749613	0.931793	0.832482	0.165979	0.170217	0.964677	-0.0518823	-2.41097	6.77512e-49	both	0.540053	0.999545	-1	2	-1	-1	1739	148	223	0.53134
uc007dxb.2	Nvl	ENSMUST00000027797	18.0421	130	14.7659	63	17.2865	135	12.7858	74	10.0662	332	9.76876	326	11.293	514	9.53607	345	1.79235	1.51155	1.53073	1.34079	1.79235	1.51155	1.53073	1.34079	0.916614	1.05012	0.86913	-0.202356	0.169857	1	translational_only	0.300461	0.999545	-1	2	1	2	9392	97	6727	0.393313
uc007dxe.2	Cnih4	ENSMUST00000134115	80.0716	82	56.4904	37	101.426	116	56.5975	49	243.776	846	254.31	873	215.607	910	254.858	909	0.328463	0.222132	0.470422	0.222075	0.328463	0.222132	0.470422	0.222075	1.15716	0.944546	1.25772	0.330816	-0.10447	1	translational_only	0.548368	0.999545	1	2	-1	2	3268	62	2786	0.383415
uc007dxf.2	Wdr26	ENSMUST00000162819	42.3071	228	34.4705	110	33.5555	196	30.4934	132	41.3703	1020	39.8046	993	29.9727	1019	26.5518	718	1.02264	0.865992	1.11953	1.14845	1.02264	0.865992	1.11953	1.14845	0.834213	0.69633	1.20086	0.264065	-0.425057	0.0386781	both	0.644106	0.999545	1	2	-1	-1	7047	541	4580	0.416631
uc007dxo.2	Lbr	ENSMUST00000005003	85.1409	448	74.1393	231	91.7046	523	81.9074	346	48.8632	1175	52.5254	1278	52.6248	1743	46.3472	1223	1.74243	1.41149	1.74261	1.76726	1.74243	1.41149	1.74261	1.76726	1.08998	0.976164	1.11286	0.154268	0.0617406	1	translational_only	0.759025	0.999545	1	2	1	2	3552	128	1543	0.442568
uc007dxw.1	Degs1	ENSMUST00000035295	111.378	282	85.5565	133	88.7822	245	77.6036	161	112.722	1194	116.745	1239	82.5949	1195	98.5574	1140	0.98808	0.732852	1.07491	0.787395	0.98808	0.732852	1.07491	0.787395	0.844879	0.789451	1.08215	0.1139	-0.248569	0.506718	translational_only	0.99659	0.999801	-1	2	-1	2	2005	56	977	0.417456
uc007dyb.1	Fbxo28	ENSMUST00000051431	28.3441	87	16.4908	30	11.1115	37	18.2351	45	15.0752	212	13.7043	195	9.31929	181	9.72009	150	1.88019	1.20333	1.19232	1.87603	1.88019	1.20333	1.19232	1.87603	0.65455	0.661562	0.995079	-0.00711712	-0.49953	0.0366152	both	0.62884	0.999545	-1	2	-1	-1	4913	17	3789	0.447995
uc007dyc.1	Trp53bp2	ENSMUST00000117245	8.2522	79	6.87992	39	8.86665	92	6.76238	52	3.62954	159	3.90528	173	5.44913	329	3.55926	171	2.27363	1.7617	1.62717	1.89994	2.27363	1.7617	1.62717	1.89994	1.03284	1.19557	0.874058	-0.1942	0.360351	0.48015	translational_only	0.30952	0.999545	-1	2	1	2	4370	257	708	0.51167
uc007dye.2	Capn2	ENSMUST00000068505	201.749	1182	154.705	538	115.534	734	97.7237	461	121.811	3232	117.193	3157	77.1582	2815	55.6568	1630	1.65625	1.32009	1.49736	1.75583	1.65625	1.32009	1.49736	1.75583	0.598275	0.555703	1.09302	0.128318	-0.751584	0.000241902	both	0.890965	0.999545	1	2	-1	-1	3185	129	953	0.492308
uc007dym.1	Dusp10	ENSMUST00000048655	28.9014	117	20.024	48	7.52102	33	6.76565	22	30.2207	560	28.9608	543	8.98715	230	10.3765	211	0.956346	0.691417	0.836863	0.652016	0.956346	0.691417	0.836863	0.652016	0.292009	0.327191	0.903576	-0.146283	-1.5175	1.19227e-17	both	0.453649	0.999545	-1	2	-1	-1	2712	147	1113	0.455752
uc007dyn.2	Hlx	ENSMUST00000048572	19.8053	79	14.8183	35	10.64	46	8.12061	26	19.0041	346	20.3273	375	10.2856	259	10.2888	206	1.04216	0.728986	1.03445	0.789267	1.04216	0.728986	1.03445	0.789267	0.541844	0.523105	1.02968	0.0421996	-0.835165	7.65571e-06	both	0.836091	0.999545	-1	2	-1	-1	2147	352	364	0.597578
uc007dyq.1	42431	ENSMUST00000068725	51.6689	145	53.5584	89	37.8848	115	39.4031	89	46.6976	592	50.0816	647	59.6738	1048	33.1505	464	1.10646	1.06942	0.634865	1.18861	1.10646	1.06942	0.634865	1.18861	0.734485	0.959135	0.83804	-0.254909	0.0413332	1	translational_only	0.112318	0.999545	-1	2	1	2	1883	30	836	0.501859
uc007dyu.2	Rab3gap2	ENSMUST00000069652	23.2074	272	22.0458	153	16.6887	212	15.0834	142	20.9426	1123	22.5539	1224	14.5497	1077	14.4077	848	1.10815	0.977471	1.14701	1.0469	1.10815	0.977471	1.14701	1.0469	0.702097	0.665741	1.05193	0.073034	-0.489319	0.00778609	both	0.881473	0.999545	-1	2	-1	-1	6988	74	2750	0.467516
uc007dyz.1	Iars2	ENSMUST00000027921	14.7579	126	13.2527	67	8.96935	83	6.9992	48	12.3631	483	15.9321	630	18.002	971	9.49353	407	1.1937	0.831827	0.498241	0.73726	1.1937	0.831827	0.498241	0.73726	0.570089	0.971741	0.609964	-0.713204	0.0596329	1	translational_only	0.00585711	0.460213	-1	-1	1	2	3540	114	387	0.478814
uc007dzc.1	Bpnt1	ENSMUST00000027916	53.062	136	34.2629	52	42.1172	117	25.7439	53	28.8419	338	25.1593	298	21.487	347	22.1618	285	1.83975	1.36184	1.96013	1.16163	1.83975	1.36184	1.96013	1.16163	0.77711	0.808293	0.975065	-0.0364304	-0.211139	0.847073	translational_only	0.673744	0.999545	-1	2	-1	2	2182	112	1143	0.350137
uc007dzg.1	Eprs	ENSMUST00000046514	75.423	964	54.1735	410	48.1484	667	41.8841	430	39.3312	2298	40.3183	2383	57.6165	4641	36.2549	2325	1.91764	1.34365	0.83567	1.15527	1.91764	1.34365	0.83567	1.15527	0.694713	1.17856	0.610476	-0.711994	0.334404	0.457516	translational_only	0.00242362	0.356548	-1	-1	1	2	4850	103	208	0.469278
uc007dzo.2	Tgfb2	ENSMUST00000045288	19.3494	67	15.1192	31	34.9054	131	29.1226	81	6.75085	107	8.23082	132	14.5728	319	13.2813	231	2.86621	1.8369	2.39524	2.19276	2.86621	1.8369	2.39524	2.19276	1.85757	1.85921	0.975523	-0.0357522	0.993811	2.07755e-06	both	NA	NA	-1	2	1	1	4725	1218	2262	0.461799
uc007dzq.2	Rrp15	ENSMUST00000001339	25.789	58	16.1144	22	15.8005	39	15.6783	29	16.0162	157	14.0808	138	19.4258	255	11.1791	122	1.61018	1.14442	0.813379	1.40247	1.61018	1.14442	0.813379	1.40247	0.751224	1.01687	0.804416	-0.313986	0.11757	1	translational_only	NA	NA	-1	2	1	2	1212	50	316	0.433993
uc007eai.1	Kctd3	ENSMUST00000085678	7.17436	48	5.47447	22	5.29314	39	3.66271	20	14.5898	389	13.7084	370	5.03906	197	4.72914	151	0.491738	0.399353	1.05042	0.774498	0.491738	0.399353	1.05042	0.774498	0.708038	0.345189	2.04796	1.03419	-1.32983	2.69232e-13	both	0.0180151	0.62088	1	1	-1	-1	3703	228	1027	0.514718
uc007eao.2	Cenpf	ENSMUST00000171929	9.92741	252	12.2441	184	8.68685	239	9.66173	197	4.72153	548	4.26989	502	4.36403	700	3.71254	473	2.10258	2.86754	1.99056	2.60246	2.10258	2.86754	1.99056	2.60246	0.827575	0.898253	0.924125	-0.11384	-0.0555435	1	translational_only	0.431227	0.999545	-1	2	-1	2	11122	143	1985	0.420967
uc007eau.1	Ptpn14	ENSMUST00000097442	34.8705	350	28.7634	171	21.5955	235	20.9559	169	15.7846	725	17.2549	801	10.4004	659	11.5835	584	2.20915	1.66697	2.07642	1.80913	2.20915	1.66697	2.07642	1.80913	0.668693	0.66538	1.00243	0.00350717	-0.490812	0.0132418	both	0.82815	0.999545	-1	2	-1	-1	10744	536	6638	0.520942
uc007eax.1	Smyd2	ENSMUST00000027897	39.1843	142	34.9512	75	31.0608	122	25.7655	75	81.9909	1359	81.2078	1363	50.9396	1167	50.306	915	0.477911	0.430392	0.609758	0.512175	0.477911	0.430392	0.609758	0.512175	0.76652	0.620383	1.2352	0.304741	-0.591018	0.000568558	both	0.775848	0.999545	1	2	-1	-1	1605	9	294	0.54704
uc007ebi.2	Rps6kc1	ENSMUST00000061611	8.64079	77	11.1813	59	7.04045	68	7.26473	52	5.88378	240	6.81058	281	5.02354	283	2.83818	127	1.46858	1.64175	1.40149	2.55964	1.46858	1.64175	1.40149	2.55964	0.72168	0.619308	1.27354	0.348849	-0.58436	0.103595	translational_only	NA	NA	-1	2	-1	2	3995	110	714	0.539675
uc007ebm.2	Angel2	ENSMUST00000066632	10.3902	47	4.44943	12	7.31982	36	7.38472	27	11.9466	237	10.8177	217	3.7349	104	4.75436	106	0.869715	0.41131	1.95984	1.55325	0.869715	0.41131	1.95984	1.55325	0.990899	0.372919	2.74241	1.45545	-1.30396	1.13622e-09	both	NA	NA	-1	2	-1	-1	3230	195	1400	0.429102
uc007ebv.1	Mfsd7b	ENSMUST00000085635	13.8247	65	10.7756	30	14.325	73	13.5041	51	6.83445	147	7.40233	161	5.85399	174	6.39374	151	2.0228	1.4557	2.44704	2.11208	2.0228	1.4557	2.44704	2.11208	1.13125	0.860288	1.31066	0.390296	-0.120883	1	translational_only	NA	NA	-1	2	-1	2	4087	97	2307	0.436506
uc007ecg.1	Nenf	ENSMUST00000046770	86.7584	121	74.7715	62	29.709	45	21.3802	24	301.559	1890	301.18	1906	86.5198	752	116.029	798	0.2877	0.248261	0.343378	0.184266	0.2877	0.248261	0.343378	0.184266	0.316283	0.336047	0.984481	-0.0225646	-1.47391	7.09042e-16	both	0.508868	0.999545	-1	2	-1	-1	658	26	116	0.618541
uc007ech.1	Tmem206	ENSMUST00000027940	5.13789	15	3.47073	6	12.641	40	7.24929	17	7.55784	101	6.58843	89	7.85637	145	9.48779	139			1.60902	0.764066	0.679809	0.526792	1.60902	0.764066	2.31051	1.22606	1.96675	0.975813	0.385018	0.313683	translational_only	NA	NA	-1	2	1	2	4204	76	3075	0.465033
uc007ecp.2	Ints7	ENSMUST00000045450	22.8294	186	15.7533	76	14.2686	126	14.9748	98	21.6616	807	19.8963	750	13.9838	720	13.7177	561	1.05391	0.791769	1.02036	1.09164	1.05391	0.791769	1.02036	1.09164	0.757941	0.666576	1.1443	0.19446	-0.486741	0.0120893	both	0.830213	0.999545	1	2	-1	-1	5349	222	2226	0.463451
uc007ecu.3	Lpgat1	ENSMUST00000110855	31.8694	109	23.7009	48	25.6271	95	26.2079	72	20.5677	322	20.4073	323	11.2849	244	12.6311	217	1.54949	1.16139	2.27092	2.07487	1.54949	1.16139	2.27092	2.07487	0.932784	0.583673	1.60309	0.680859	-0.6812	0.000619304	both	0.0198108	0.643241	1	1	-1	-1	7066	113	5723	0.422446
uc007ecx.2	Nek2	ENSMUST00000027931	34.0255	126	20.0355	44	19.9017	80	19.805	59	14.2178	241	13.0121	223	13.9896	327	9.05957	168	2.39315	1.53975	1.4226	2.18609	2.39315	1.53975	1.4226	2.18609	0.734481	0.846465	0.917563	-0.12412	-0.138585	1	translational_only	0.383057	0.999545	-1	2	-1	2	3197	173	1692	0.504223
uc007edc.1	Slc30a1	ENSMUST00000044954	12.8023	54	9.20873	23	7.4371	34	6.78855	23	6.47858	125	6.60776	129	4.53776	121	5.05027	107	1.9761	1.39362	1.63894	1.34419	1.9761	1.39362	1.63894	1.34419	0.646295	0.732675	0.885273	-0.175805	-0.354079	0.33668	translational_only	NA	NA	-1	2	-1	2	5230	226	3492	0.448375
uc007edp.2	Hhat	ENSMUST00000044190	6.69211	28	8.07256	20	7.05641	32	5.05833	17	8.04097	154	6.81632	132	3.29361	87	4.04445	85	0.832252	1.1843			0.832252	1.1843	2.14245	1.25068	0.820523	0.493903	1.68265	0.750731	-0.928239	0.000130445	both	NA	NA	-1	2	-1	-1	2835	279	1056	0.533686
uc007edw.1	Diexf	ENSMUST00000085555	11.9066	77	7.05078	27	10.1294	71	6.7378	35	12.003	355	12.2249	366	9.64993	394	9.59077	311	0.991972	0.576755	1.04969	0.70253	0.991972	0.576755	1.04969	0.70253	0.889744	0.794156	1.11697	0.159588	-0.235865	0.586655	translational_only	0.886196	0.999545	1	2	-1	2	5548	101	3140	0.438536
uc007een.1	Plxna2	ENSMUST00000027952	1.18788	19	1.58318	15	2.07768	36	2.10264	27	1.16778	85	1.62359	119	1.72987	173	1.25712	100		0.975116	1.20107		1.01721	0.975116	1.20107	1.67259	1.50856	1.07008	1.44236	0.528434	0.200873	1	translational_only	NA	NA	-1	2	1	2	11035	643	4707	0.497417
uc007eeq.2	Cd34	ENSMUST00000016638	141.959	453	92.6144	175	76.6194	265	70.6148	181	129.394	1885	119.596	1766	60.7369	1222	65.4448	1049	1.0971	0.774392	1.2615	1.079	1.0971	0.774392	1.2615	1.079	0.627669	0.506773	1.2506	0.322623	-0.883045	9.15446e-08	both	0.45989	0.999545	1	2	-1	-1	2465	145	1171	0.492901
uc007efb.1	Cnksr3	ENSMUST00000015346	9.01423	42	9.06141	25	18.6139	94	16.2991	61	9.94027	212	11.2143	242	13.1726	388	13.0828	306	0.90684	0.808022	1.41307	1.24584	0.90684	0.808022	1.41307	1.24584	1.93149	1.24112	1.55051	0.632744	0.409019	0.0924732	translational_only	0.0950912	0.964208	1	2	1	2	3448	554	1226	0.528712
uc007egi.1	Mtrf1l	ENSMUST00000019908	8.34755	26	11.3863	21	15.6997	53	10.3923	26	7.99601	114	8.04121	116	19.5705	385	14.5732	228	1.04396	1.41599	0.802211	0.71311	1.04396	1.41599	0.802211	0.71311	1.3222	2.12903	0.615996	-0.699008	1.19124	1.14352e-07	both	NA	NA	-1	2	1	1	2621	180	1319	0.363602
uc007egj.1	Fbxo5	ENSMUST00000019907	20.0369	67	13.1576	27	15.2963	56	12.8035	35	18.9537	242	19.4427	255	33.1279	503	19.2924	264	1.05715	0.676737	0.461734	0.663655	1.05715	0.676737	0.461734	0.663655	0.846519	1.36524	0.649056	-0.623585	0.394299	0.305232	translational_only	0.0407282	0.870475	-1	-1	1	2	1807	128	413	0.432761
uc007egq.2	Syne1	ENSMUST00000095899	8.48086	216	8.55081	129	4.88665	135	3.71289	76	4.51028	525	3.92354	462	2.14103	344	1.67556	214	1.88034	2.17936	2.28238	2.21591	1.88034	2.17936	2.28238	2.21591	0.504915	0.452533	1.10804	0.148005	-1.04204	1.99058e-07	both	0.745775	0.999545	1	2	-1	-1	10872	28	1811	0.465692
uc007egy.1	Armt1	ENSMUST00000095893	7.89154	29	8.27204	18	17.0727	68	14.2287	42	12.7816	215	12.9848	221	21.3136	494	19.2322	355	0.617414	0.637058	0.801025	0.739842	0.617414	0.637058	0.801025	0.739842	1.93654	1.57359	1.2283	0.296661	0.751387	9.63069e-05	both	0.780144	0.999545	1	2	1	1	2290	66	904	0.458079
uc007ehi.2	Akap12	ENSMUST00000045730	5.89847	84	6.04793	51	5.24776	81	5.24523	60	2.02577	132	1.83489	121	2.74412	247	2.11134	151	2.91172	3.29607	1.91236	2.48431	2.91172	3.29607	1.91236	2.48431	0.87834	1.25768	0.70825	-0.49767	0.434524	0.176384	translational_only	NA	NA	-1	2	1	2	6247	190	1002	0.52073
uc007ehj.2	Mthfd1l	ENSMUST00000117291	26.2562	216	23.4024	114	26.0552	232	25.3597	167	14.698	551	16.6252	628	25.6009	1298	13.8054	564	1.78638	1.40765	1.01774	1.83694	1.78638	1.40765	1.01774	1.83694	1.03537	1.25806	0.893756	-0.162047	0.411767	0.414789	translational_only	0.238376	0.999545	-1	2	1	2	3731	180	617	0.518092
uc007ehx.2	Pcmt1	ENSMUST00000162606	80.2419	190	59.9105	84	93.5164	240	72.5571	138	92.9095	1007	99.7216	1091	121.106	1802	109.89	1307	0.863657	0.600778	0.772187	0.66027	0.863657	0.600778	0.772187	0.66027	1.18495	1.19916	0.978163	-0.031853	0.357641	0.102322	translational_only	0.590584	0.999545	-1	2	1	2	1917	281	778	0.502869
uc007eid.2	Nup43	ENSMUST00000040135	29.9298	95	15.9617	30	42.4387	146	31.3779	80	47.3534	688	52.1524	766	73.7548	1476	78.7154	1255	0.632051	0.306058	0.575403	0.398625	0.632051	0.306058	0.575403	0.398625	1.6085	1.53227	1.03829	0.054206	0.711839	3.51479e-05	both	0.74507	0.999545	-1	2	1	1	1290	58	89	0.462016
uc007eig.2	Lats1	ENSMUST00000165952	24.5594	234	18.9654	107	23.0603	238	18.6849	143	10.3257	449	10.9519	482	10.1529	609	10.5319	503	2.37846	1.7317	2.27131	1.77412	2.37846	1.7317	2.27131	1.77412	0.959115	0.972139	0.984251	-0.0229017	0.0560421	1	translational_only	0.781621	0.999545	-1	2	1	2	7215	374	3451	0.408455
uc007eii.2	Katna1	ENSMUST00000165806	3.21127	13	2.88389	7	6.18381	27	7.67216	25	5.04137	88	3.91683	70	11.6592	240	6.36327	118			0.530379	1.20569	0.636984	0.736283	0.530379	1.20569	2.27327	2.01184	1.26419	0.338216	0.944085	0.00335928	both	NA	NA	-1	2	1	1	1775	131	162	0.452958
uc007eip.2	Ppil4	ENSMUST00000015901	15.2741	63	9.41715	23	20.3697	91	15.3936	51	4.1872	79	4.13826	79	7.80666	203	5.65501	117	3.64781		2.60927	2.72211	3.64781	2.27563	2.60927	2.72211	1.44842	1.61693	0.900047	-0.151927	0.796391	0.00352175	both	NA	NA	-1	2	1	1	2896	57	1360	0.358425
uc007eir.2	Tab2	ENSMUST00000146444	41.7898	242	44.3494	152	31.5772	198	35.1888	164	31.6253	817	31.6039	829	22.6433	801	24.9057	711	1.3214	1.40329	1.39455	1.41288	1.3214	1.40329	1.39455	1.41288	0.775095	0.752009	1.03037	0.0431594	-0.317785	0.201146	translational_only	0.857121	0.999545	-1	2	-1	2	4278	409	1787	0.435718
uc007eiu.1	Sash1	ENSMUST00000015449	21.9485	228	19.3461	119	6.57251	74	7.19076	60	6.81394	324	6.82488	328	2.13302	140	2.14764	112	3.22112	2.83464	3.08131	3.34822	3.22112	2.83464	3.08131	3.34822	0.333294	0.313859	1.06172	0.0864047	-1.57336	1.53238e-17	both	NA	NA	-1	2	-1	-1	7183	212	3278	0.497703
uc007eiz.2	Stxbp5	ENSMUST00000038213	7.64296	72	6.99149	39	10.1888	104	13.4798	102	4.38302	189	4.69992	205	9.15137	545	7.71592	365	1.74377	1.48758	1.11336	1.74701	1.74377	1.48758	1.11336	1.74701	1.61732	1.85703	0.885195	-0.175933	0.9929	3.04968e-07	both	0.248773	0.999545	-1	2	1	1	9074	357	5366	0.432665
uc007ejg.1	Rab32	ENSMUST00000019974	34.7514	64	21.091	23	39.5775	79	31.7719	47	35.9433	303	32.7095	279	25.2523	294	33.5627	310	0.96684	0.644796	1.56729	0.946643	0.96684	0.644796	1.56729	0.946643	1.27769	0.856702	1.55986	0.641418	-0.131857	1	translational_only	0.090925	0.956111	1	2	-1	2	2054	119	1263	0.433301
uc007ejq.1	Shprh	ENSMUST00000044053	6.21639	88	5.0105	42	12.1227	186	11.4328	130	2.87103	186	2.51662	165	5.40831	484	5.38737	383	2.16521	1.99097	2.24149	2.12215	2.16521	1.99097	2.24149	2.12215	2.09813	2.00378	1.04991	0.0702725	1.09979	3.41807e-09	both	0.875801	0.999545	1	2	1	1	6949	195	1729	0.417614
uc007ejt.2	Fbxo30	ENSMUST00000129456	19.1074	120	14.2519	53	22.0364	150	17.6426	89	12.9056	371	12.6172	367	17.3193	687	13.9287	439	1.48056	1.12956	1.27236	1.26664	1.48056	1.12956	1.27236	1.26664	1.18945	1.22432	0.972755	-0.0398519	0.390739	0.131926	translational_only	0.628455	0.999545	-1	2	1	2	4977	187	2549	0.369098
uc007ejw.1	Utrn	ENSMUST00000076817	16.8966	491	19.1201	329	29.5912	932	28.0188	654	9.96617	1325	10.1961	1372	18.4605	3386	15.5448	2267	1.6954	1.87524	1.60295	1.80245	1.6954	1.87524	1.60295	1.80245	1.59954	1.68658	0.953725	-0.0683549	0.851026	7.9806e-07	both	0.543385	0.999545	-1	2	1	1	12382	89	2000	0.477629
uc007eki.2	Sf3b5	ENSMUST00000105139	154.65	105	119.393	48	171.223	126	157.693	86	452.086	1405	436.944	1374	425.425	1826	504.929	1722	0.342082	0.273246	0.402474	0.312308	0.342082	0.273246	0.402474	0.312308	1.20023	1.04648	1.16163	0.216149	0.162129	1	translational_only	0.901531	0.999545	-1	2	1	2	734	173	300	0.588556
uc007ekm.2	Plagl1	ENSMUST00000121646	15.595	90	16.3278	57	6.79126	43	5.94983	28	4.5199	117	5.52052	143	2.21668	80	2.18424	64	3.4503	2.95765			3.4503	2.95765	3.06371	2.72398	0.399122	0.43832	0.903206	-0.146873	-1.05309	9.56037e-06	both	NA	NA	-1	2	-1	-1	5261	555	2591	0.403345
uc007ekp.1	Ltv1	ENSMUST00000019950	33.4449	130	17.1665	40	46.5571	195	32.87	103	15.9498	278	13.5319	239	49.7808	1136	26.7962	503	2.09688	1.2686	0.935243	1.22666	2.09688	1.2686	0.935243	1.22666	1.56935	2.59744	0.642377	-0.638508	1.4161	3.57118e-07	both	0.0126565	0.593861	-1	-1	1	1	1768	107	248	0.463801
uc007ekw.1	Fuca2	ENSMUST00000121465	1.55379	6	4.37338	10	10.7518	45	8.05998	25	4.13602	73	4.53565	81	14.6456	357	13.6507	264			0.734135	0.590445	0.375672	0.964221	0.734135	0.590445	3.17383	3.26307	0.988571	-0.0165838	1.80283	1.91742e-19	both	NA	NA	-1	2	1	1	3954	140	2428	0.255185
uc007eky.2	Pex3	ENSMUST00000019945	8.38564	26	7.61158	14	13.9731	47	8.81753	22	14.2294	199	14.1337	200	19.0229	363	20.5201	312	0.589319	0.53854	0.734543	0.429702	0.589319	0.53854	0.734543	0.429702	1.42466	1.39417	1.03226	0.0458074	0.55979	0.00772849	both	0.644246	0.999545	-1	2	1	1	2303	244	940	0.414677
uc007ela.2	Adat2	ENSMUST00000019944	14.0121	22	10.7561	10	24.6808	42	18.2373	23	13.6361	98	11.2764	82	22.9113	227	16.4839	130			1.07723	1.10637	1.02758	0.95386	1.07723	1.10637	1.73279	1.58134	1.10203	0.140165	0.76381	0.00658986	both	NA	NA	-1	2	1	1	1453	359	518	0.485891
uc007eli.1	Hivep2	ENSMUST00000191138	3.84013	79	1.64227	20	2.78061	62	3.20781	53	1.61482	152	1.59573	152	2.05612	267	2.05215	212	2.37805	1.02917	1.35236	1.56314	2.37805	1.02917	1.35236	1.56314	1.0923	1.27962	0.855683	-0.224852	0.452313	0.063021	translational_only	0.375935	0.999545	-1	2	1	2	9768	833	1642	0.488329
uc007elk.1	Adgrg6	ENSMUST00000041168	8.43814	83	6.18084	36	13.7884	147	16.2006	128	4.37666	197	4.47921	204	7.93051	493	7.53133	372	1.92799	1.3799	1.73866	2.1511	1.92799	1.3799	1.73866	2.1511	2.05138	1.74594	1.1759	0.233771	0.902196	9.54258e-07	both	0.534456	0.999545	1	2	1	1	6505	121	2886	0.439816
uc007ell.1	Vta1	ENSMUST00000154132	48.2204	124	27.5826	42	55.6122	155	44.0559	91	61.7286	725	59.9133	712	79.8708	1297	81.4033	1048	0.781168	0.460375	0.696277	0.541205	0.781168	0.460375	0.696277	0.541205	1.31483	1.32581	0.99673	-0.00472557	0.504163	0.00599524	both	0.641949	0.999545	-1	2	1	1	1325	28	367	0.468679
uc007elt.2	Cited2	ENSMUST00000038107	161.491	360	158.888	210	379.048	917	387.579	694	179.7	1829	171.458	1768	350.391	4869	415.745	4608	0.898674	0.926688	1.08179	0.932252	0.898674	0.926688	1.08179	0.932252	2.39287	2.18174	1.10336	0.141909	1.2079	3.55582e-13	both	0.92648	0.999545	1	2	1	1	1969	240	919	0.459624
uc007elw.1	Heca	ENSMUST00000037879	11.4454	52	7.40652	20	12.3876	61	13.9576	51	3.47728	72	3.4081	71	5.40095	153	5.09889	116			2.29359	2.73738	3.29148	2.17321	2.29359	2.73738	1.39748	1.52495	0.920633	-0.119303	0.705325	0.00536731	both	NA	NA	-1	2	1	1	4049	285	2129	0.45715
uc007ema.2	Reps1	ENSMUST00000126390	30.6146	205	19.6719	78	25.6281	186	31.7925	171	38.1227	1168	37.6613	1168	38.2881	1616	43.1878	1452	0.803054	0.522337	0.669351	0.736146	0.803054	0.522337	0.669351	0.736146	1.14187	1.07511	1.06044	0.084662	0.199243	0.74517	translational_only	0.810355	0.999545	-1	2	1	2	2618	23	207	0.485103
uc007emj.2	Nhsl1	ENSMUST00000100054	3.43699	46	3.78545	30	4.82555	70	4.65097	50	1.12653	69	1.66163	103	2.16334	183	1.88912	127		2.27815	2.23061	2.46198	3.05094	2.27815	2.23061	2.46198	1.31209	1.45345	0.88056	-0.183507	0.640201	0.0288673	both	NA	NA	-1	2	1	1	6797	127	1918	0.505517
uc007emz.1	Perp	ENSMUST00000019998	22.6836	36	23.4104	22	108.132	186	106.685	136	15.0312	109	16.8698	124	45.8309	459	51.9004	413	1.5091	1.38771	2.35936	2.05557	1.5091	1.38771	2.35936	2.05557	4.66039	3.06358	1.52406	0.607922	1.70858	2.39372e-19	both	NA	NA	-1	2	1	1	1900	122	1196	0.473158
uc007ena.3	Tnfaip3	ENSMUST00000105527	3.06998	21	4.19703	17	34.9338	259	37.3099	205	1.69268	53	2.30418	73	21.6254	934	20.3398	698			1.61541	1.83433	1.81368	1.82148	1.61541	1.83433	9.94132	10.4995	0.948991	-0.075534	3.48602	9.54927e-67	both	NA	NA	-1	2	1	1	4337	77	1821	0.480747
uc007eng.1	Ifngr1	ENSMUST00000020188	29.791	119	29.1718	69	41.5757	180	40.2051	129	40.5812	742	45.5986	843	43.6483	1103	50.609	1014	0.734109	0.639753	0.952517	0.794427	0.734109	0.639753	0.952517	0.794427	1.38699	1.09373	1.27156	0.346596	0.226023	0.641162	translational_only	0.55519	0.999545	1	2	1	2	2099	128	537	0.485946
uc007enl.2	Pex7	ENSMUST00000020182	12.8403	34	5.10227	8	7.66565	22	6.11215	13	19.7187	239	15.8189	194	13.2621	222	14.1348	188	0.651176	0.322542	0.578014	0.432417	0.651176	0.322542	0.578014	0.432417	0.767882	0.770927	1.0377	0.0533946	-0.279524	0.592127	translational_only	0.779795	0.999545	-1	2	-1	2	1894	101	836	0.427666
uc007enu.1	Bclaf1	ENSMUST00000043881	43.6146	334	26.5757	121	47.2858	389	40.6874	250	14.942	517	13.7499	483	26.6417	1255	16.9098	637	2.91891	1.93279	1.77488	2.40614	2.91891	1.93279	1.77488	2.40614	1.25335	1.5179	0.861764	-0.214635	0.682261	0.00948246	both	0.249847	0.999545	-1	2	1	1	5454	250	2444	0.395856
uc007eoo.1	Hbs1l	ENSMUST00000020153	20.012	113	12.7455	43	25.8166	158	21.8055	99	22.2892	566	19.9882	512	38.311	1297	25.6332	707	0.897835	0.637653	0.673869	0.850675	0.897835	0.637653	0.673869	0.850675	1.45377	1.51249	0.992873	-0.0103193	0.661907	0.00665414	both	0.61916	0.999545	-1	2	1	1	2793	155	589	0.482635
uc007eov.2	Sgk1	ENSMUST00000120509	112.786	492	80.0573	208	126.761	597	94.3017	330	79.8161	1540	84.6891	1660	71.7295	1896	87.4466	1849	1.41307	0.945309	1.76721	1.07839	1.41307	0.945309	1.76721	1.07839	1.14633	0.967605	1.20659	0.270938	0.0400642	1	translational_only	0.479709	0.999545	1	2	1	2	3105	455	1075	0.483092
uc007epp.2	Tbpl1	ENSMUST00000127698	15.7105	24	5.52746	5	18.1188	30	25.2636	31	20.3072	142	20.6353	146	26.5082	256	22.2849	171	0.773642	0.267865	0.683517	1.13366	0.773642	0.267865	0.683517	1.13366	2.04268	1.19175	1.74476	0.803028	0.355116	0.30023	translational_only	NA	NA	-1	2	1	2	2875	375	1939	0.436174
uc007ept.1	Eya4	ENSMUST00000092665	15.0666	78	11.4174	35	13.901	78	10.3406	43	7.77316	184	7.0978	170	5.39242	176	6.62157	172	1.93829	1.60858	2.57788	1.56165	1.93829	1.60858	2.57788	1.56165	0.915327	0.807883	1.16709	0.222917	-0.217093	0.985062	translational_only	0.555204	0.999545	1	2	-1	2	4099	208	2040	0.420102
uc007epx.2	Rps12	ENSMUST00000073926	0.95537	1	0	0	4.43123	5	8.28098	7	16.5297	64	18.5023	72	30.9533	155	34.216	141			0.143158	0.24202	0.0577972	0	0.143158	0.24202	13.3061	1.86028	6.66431	2.73646	0.924528	9.51432e-05	both	NA	NA	-1	2	1	1	518	91	28	0.527027
uc007eqa.2	Slc18b1	ENSMUST00000119597	9.66667	37	7.50068	17	9.64194	40	5.85465	18	7.64827	134	9.19476	163	6.81899	165	8.16602	157	1.2639	0.815755	1.41398	0.716953	1.2639	0.815755	1.41398	0.716953	0.902678	0.889686	1.02466	0.0351402	-0.0760198	1	translational_only	NA	NA	-1	2	-1	2	2837	155	1308	0.408178
uc007eqs.1	Stx7	ENSMUST00000020174	42.5108	92	24.9711	32	33.6797	79	36.8167	64	48.417	479	45.6535	457	34.6912	474	37.2565	405	0.878014	0.546971	0.970843	0.988195	0.878014	0.546971	0.970843	0.988195	1.04467	0.764828	1.37478	0.459199	-0.289481	0.328753	translational_only	0.309825	0.999545	1	2	-1	2	2500	475	1239	0.4592
uc007ere.2	Med23	ENSMUST00000092646	9.54672	111	8.42433	58	18.5685	234	18.4168	172	7.49699	399	7.55794	407	12.1355	892	13.4412	785	1.27341	1.11463	1.5301	1.37018	1.27341	1.11463	1.5301	1.37018	2.05804	1.69889	1.2145	0.280362	0.861017	7.14381e-07	both	0.506669	0.999545	1	2	1	1	4946	113	702	0.478973
uc007erk.2	Epb41l2	ENSMUST00000053748	81.38	678	69.3251	342	70.9864	641	73.3956	491	29.3211	1114	28.1529	1083	38.971	2040	30.2457	1261	2.77547	2.46245	1.82152	2.42665	2.77547	2.46245	1.82152	2.42665	0.958044	1.20431	0.811041	-0.302154	0.364404	0.163982	translational_only	0.0967611	0.967611	-1	2	1	2	4388	198	1223	0.490656
uc007esb.1	L3mbtl3	ENSMUST00000174766	6.04595	45	5.89932	26	4.09068	33	3.34658	20	4.11395	140	3.39403	117	2.29878	108	2.54104	95	1.46962	1.73815	1.7795		1.46962	1.73815	1.7795	1.31701	0.622611	0.644624	0.965315	-0.0509277	-0.539506	0.0613388	translational_only	NA	NA	-1	2	-1	2	3411	91	668	0.425682
uc007ese.1	Arhgap18	ENSMUST00000039557	5.38032	30	1.81725	6	5.46046	33	4.24222	19	2.46837	63	2.01357	52	3.74854	132	2.74924	77			1.45669		2.17971	0.902498	1.45669	1.54305	1.34805	1.44977	0.973246	-0.0391233	0.642208	0.0620819	translational_only	NA	NA	-1	2	1	2	3616	72	1552	0.415653
uc007esg.2	Lama2	ENSMUST00000092639	2.61393	69	2.55852	40	0.174667	5	0	0	0.945913	114	1.16736	142	0.011979	2	0.015076	2	2.76339	2.19171			2.76339	2.19171	14.5811	0	0.0337687	0.0128024	2.94264	1.55711	-6.1095	9.24175e-49	both	NA	NA	-1	2	-1	-1	9713	146	210	0.469474
uc007esn.1	Ptprk	ENSMUST00000166468	13.5613	167	13.3025	97	63.2034	843	60.4837	598	8.98085	506	9.24639	527	74.2697	5742	46.4933	2862	1.51002	1.43867	0.850998	1.30091	1.51002	1.43867	0.850998	1.30091	4.60424	6.62541	0.729786	-0.454455	2.81833	2.12296e-35	both	0.0301089	0.760671	-1	-1	1	1	6177	261	1542	0.455075
uc007esx.2	Echdc1	ENSMUST00000020034	14.9151	40	10.0754	16	14.1052	41	11.6053	25	5.53932	68	6.11866	76	10.7462	182	5.56752	75			1.31257		2.69258	1.64666	1.31257	2.08447	1.02881	1.39936	0.782866	-0.353163	0.592139	0.251193	translational_only	NA	NA	-1	2	1	2	3048	167	1912	0.383858
uc007etb.2	Rspo3	ENSMUST00000092623	26.0876	60	18.3569	25	2.80808	7	3.78908	7	16.2428	171	15.302	163	3.37007	49	2.164	25	1.6061	1.19964			1.6061	1.19964	0.83324	1.75096	0.148436	0.175435	0.92104	-0.118664	-2.3837	6.43527e-23	both	NA	NA	-1	2	-1	-1	2396	539	1023	0.435309
uc007etd.2	Cenpw	ENSMUST00000099985	17.2816	11	7.62084	3	13.0455	9	9.69328	5	65.3041	126	45.7933	84	57.3373	121	70.9503	123	0.264632		0.227523	0.136621	0.264632	0.166418	0.227523	0.136621	0.913117	1.15473	0.844781	-0.24335	0.0249857	1	translational_only	NA	NA	-1	2	1	2	1512	60	1191	0.279101
uc007ete.1	Trmt11	ENSMUST00000019927	10.9005	42	3.06811	7	14.1279	59	5.16975	16	10.3193	182	10.0866	180	13.1881	321	13.589	263	1.05632	0.304175	1.07126	0.380436	1.05632	0.304175	1.07126	0.380436	1.3815	1.31222	1.06704	0.0936118	0.488146	0.0293888	both	0.933837	0.999545	-1	2	1	1	2359	88	888	0.390844
uc007etl.2	Ncoa7	ENSMUST00000068567	4.6528	37	2.54841	12	4.98896	43	5.47941	35	2.44503	89	2.11855	78	3.28448	165	2.73076	109			1.51895	2.00655	1.90296	1.2029	1.51895	2.00655	1.4537	1.31809	1.13511	0.182836	0.501035	0.105448	translational_only	NA	NA	-1	2	1	2	5107	341	1934	0.410221
uc007etq.1	Hddc2	ENSMUST00000000304	34.1887	56	7.2172	7	47.3154	84	30.4024	40	45.8813	344	41.3906	314	78.7464	814	92.289	758	0.745155	0.174368	0.600859	0.329426	0.745155	0.174368	0.600859	0.329426	1.87697	1.9598	1.0117	0.0167861	1.06381	5.15383e-09	both	0.831428	0.999545	-1	2	1	1	718	10	108	0.501393
uc007etu.2	Rnf217	ENSMUST00000081989	21.2972	92	24.6292	63	17.7272	83	17.5799	61	19.129	378	17.2937	346	8.60524	235	12.1667	264	1.11334	1.42417	2.06005	1.44492	1.11334	1.42417	2.06005	1.44492	0.768777	0.570302	1.38126	0.465986	-0.718447	0.0024154	both	0.160017	0.999545	1	2	-1	-1	2860	541	771	0.554545
uc007eum.1	Zufsp	ENSMUST00000048222	2.52491	12	2.48736	7	2.52369	13	4.19119	16	3.7693	82	3.22552	71	5.62486	169	4.98478	119			0.448668	0.840796	0.669861	0.771149	0.448668	0.840796	1.33969	1.51679	0.894834	-0.160309	0.702106	0.00670443	both	NA	NA	-1	2	1	1	2364	213	450	0.359137
uc007eun.1	Rwdd1	ENSMUST00000019917	12.5633	22	6.1093	7	19.601	36	10.9335	16	49.6444	207	47.5378	218	99.1808	392	86.8672	316	0.253067	0.128515	0.197629	0.125865	0.253067	0.128515	0.197629	0.125865	1.63525	1.91442	0.847772	-0.238252	0.533891	0.0100636	both	0.862836	0.999545	-1	2	1	1	1082	178	172	0.42976
uc007eus.1	Dse	ENSMUST00000048010	43.1957	349	39.2961	188	44.3073	388	50.2326	326	48.0491	1777	46.0712	1724	46.4525	2366	44.2608	1795	0.898991	0.852941	0.953821	1.13492	0.898991	0.852941	0.953821	1.13492	1.14605	0.963801	1.19225	0.253689	0.041897	1	translational_only	0.735055	0.999545	1	2	1	2	4225	525	823	0.474793
uc007eut.2	Tspyl1	ENSMUST00000061372	32.427	101	22.5473	42	37.5518	127	33.8213	85	29.4673	406	30.0015	421	32.3471	608	35.8204	537	1.10044	0.751537	1.1609	0.944191	1.10044	0.751537	1.1609	0.944191	1.2983	1.14627	1.13667	0.184816	0.273504	0.390002	translational_only	0.755064	0.999545	1	2	1	2	2696	91	1465	0.465134
uc007euv.1	Nt5dc1	ENSMUST00000047885	13.5465	53	5.61139	13	6.36713	27	7.63687	24	6.81723	122	6.73269	122	4.16738	103	4.88492	96	1.9871	0.833455	1.52785		1.9871	0.833455	1.52785	1.56336	0.730979	0.668071	1.09596	0.132192	-0.490468	0.0986636	translational_only	NA	NA	-1	2	-1	2	2716	75	1237	0.375184
uc007euy.2	Frk	ENSMUST00000019913	2.79436	12	1.96629	5	5.80088	27	5.50818	19	2.69625	53	2.81557	56	4.23883	115	3.84782	83			1.36851		1.03639	0.698362	1.36851	1.43151	2.37553	1.46715	1.61407	0.690707	0.653278	0.0257571	both	NA	NA	-1	2	1	1	4647	449	2659	0.370777
uc007evf.1	Hdac2	ENSMUST00000019911	87.0272	356	46.6508	113	79.331	351	68.876	226	54.0195	1001	48.0665	905	107.201	2709	55.4934	1130	1.61103	0.970548	0.740018	1.24116	1.61103	0.970548	0.740018	1.24116	1.10869	1.5937	0.767427	-0.381899	0.756847	0.0189638	both	0.0666067	0.929969	-1	2	1	1	2004	208	329	0.432136
uc007evg.1	Marcks	ENSMUST00000092584	212.325	546	216.064	329	47.7189	133	39.6987	82	150.263	1759	161.153	1913	24.8788	404	29.3287	378	1.41302	1.34074	1.91805	1.35358	1.41302	1.34074	1.91805	1.35358	0.204061	0.174068	1.18806	0.248608	-2.42292	4.60095e-47	both	0.557104	0.999545	1	2	-1	-1	4186	391	2865	0.402771
uc007evq.2	Lama4	ENSMUST00000019992	7.61657	117	7.146	65	0.720748	12	0.32418	4	4.19545	295	5.15842	367	0.360481	35	0.272162	21	1.81544	1.38531			1.81544	1.38531	1.99941	1.19113	0.0707823	0.0676344	0.996811	-0.00460849	-3.76444	5.58693e-54	both	NA	NA	-1	2	-1	-1	6046	440	155	0.500331
uc007evu.1	Tube1	ENSMUST00000019991	3.76852	15	5.51567	13	3.24516	14	5.0044	16	6.14724	112	5.96691	110	8.18666	206	7.15747	143			0.396396	0.699186	0.613042	0.924377	0.396396	0.699186	0.88856	1.26663	0.712611	-0.488814	0.441999	0.128183	translational_only	NA	NA	-1	2	1	2	2929	60	1441	0.403209
uc007evx.2	Fyn	ENSMUST00000099967	11.9826	54	9.36858	25	24.993	122	23.7878	86	11.1849	230	9.50427	198	20.513	580	14.3501	323	1.07132	0.985723	1.2184	1.65767	1.07132	0.985723	1.2184	1.65767	2.28469	1.68509	1.39816	0.483529	0.847438	0.000481349	both	0.24571	0.999545	1	2	1	1	3529	513	1402	0.483423
uc007ewa.1	Traf3ip2	ENSMUST00000019987	8.58499	40	3.98702	11	13.0693	66	11.5105	43	10.8979	232	8.65078	186	14.3715	421	16.207	377	0.787766	0.460886	0.909391	0.710218	0.787766	0.460886	0.909391	0.710218	1.95512	1.56422	1.29709	0.375273	0.735952	0.000636726	both	0.557123	0.999545	1	2	1	1	2867	421	778	0.476456
uc007ewd.1	Rev3l	ENSMUST00000019986	4.84021	128	4.0232	63	5.40773	155	5.79108	123	3.37879	409	3.32368	407	4.48666	750	4.54702	604	1.43253	1.21046	1.20529	1.2736	1.43253	1.21046	1.20529	1.2736	1.26349	1.34781	0.93791	-0.0924792	0.527985	0.00531591	both	0.477813	0.999545	-1	2	1	1	10665	315	981	0.418847
uc007ewp.1	Rpf2	ENSMUST00000045114	4.62349	11	4.7432	7	4.90434	12	5.23899	10	4.65209	40	3.28032	30	15.1414	127	12.1719	87			0.323904		0.993853	1.44596	0.323904	0.430415	1.08291	3.44325	0.309171	-1.69352	1.39876	3.48329e-07	both	NA	NA	-1	2	1	1	1480	64	495	0.341892
uc007ewr.1	Gtf3c6	ENSMUST00000019982	36.7882	69	18.9084	21	35.4178	72	31.9087	48	22.665	194	15.4957	134	46.5539	547	26.3635	248	1.62313	1.22024	0.760791	1.21034	1.62313	1.22024	0.760791	1.21034	1.20881	1.91079	0.693239	-0.528575	1.03033	0.00171169	both	NA	NA	-1	2	1	1	1020	6	330	0.393137
uc007eww.2	Cdk19	ENSMUST00000044672	9.29601	39	8.44194	21	7.68677	35	5.93093	20	5.63151	108	4.16303	81	5.92359	157	4.12845	87	1.65071		1.29765		1.65071	2.02784	1.29765	1.4366	0.767715	1.02629	0.743296	-0.427991	0.143718	1	translational_only	NA	NA	-1	2	1	2	5807	286	4015	0.453246
uc007exe.3	Cdc40	ENSMUST00000044166	16.6564	81	8.3346	24	30.7356	162	25.0886	98	9.07468	202	7.41466	167	16.2966	501	13.3615	326	1.83549	1.12407	1.88602	1.87768	1.83549	1.12407	1.88602	1.87768	2.23377	1.79862	1.27171	0.346768	0.945792	8.9362e-06	both	0.255475	0.999545	1	2	1	1	3365	68	1557	0.399406
uc007exi.2	Wasf1	ENSMUST00000019975	3.83761	18	2.87868	8	8.64985	44	10.8759	41	5.59937	120	5.07584	110	9.3816	276	10.492	246	0.685365		0.922001	1.03658	0.685365	0.567133	0.922001	1.03658	2.90722	1.86166	1.56374	0.645002	0.984792	1.81581e-06	both	NA	NA	-1	2	1	1	2550	104	766	0.480392
uc007exk.1	Fig4	ENSMUST00000043814	18.3086	140	13.472	61	18.8226	156	17.9091	110	11.5994	406	12.0851	428	17.9071	865	15.8555	609	1.57841	1.11477	1.05113	1.12952	1.57841	1.11477	1.05113	1.12952	1.15579	1.42552	0.809693	-0.304554	0.609823	0.00125387	both	0.154076	0.999545	-1	2	1	1	3263	189	350	0.467668
uc007exn.2	Mical1	ENSMUST00000019967	20.2932	179	19.8925	104	9.29438	89	6.76821	48	19.3871	778	20.8913	848	7.6828	428	7.62567	337	1.04673	0.95219	1.20976	0.887556	1.04673	0.95219	1.20976	0.887556	0.399709	0.380066	1.04922	0.0693233	-1.29082	5.02153e-15	both	0.872901	0.999545	-1	2	-1	-1	3563	274	142	0.566938
uc007ext.1	Smpd2	ENSMUST00000126833	13.9797	49	9.63625	20	22.1111	84	19.8904	56	17.7635	285	19.0343	309	33.1604	733	38.2822	674	0.786989	0.506256	0.666793	0.519572	0.786989	0.506256	0.666793	0.519572	1.77852	1.94149	0.917355	-0.124448	1.05144	4.79662e-09	both	0.373297	0.999545	-1	2	1	1	2072	308	504	0.553089
uc007exv.1	Cd164	ENSMUST00000019962	160.676	240	108.247	101	304.869	473	262.352	310	113.21	711	103.767	673	122.129	1020	162.471	1062	1.41928	1.04317	2.49629	1.61477	1.41928	1.04317	2.49629	1.61477	2.10923	1.31166	1.6695	0.739418	0.405812	0.113247	translational_only	0.00721215	0.511175	1	1	1	2	2830	35	2201	0.406007
uc007exz.2	Cep57l1	ENSMUST00000186239	7.521	27	7.05633	15	8.22414	32	8.32293	24	8.82394	145	7.33751	122	8.95887	203	9.64931	174	0.85234	0.961679	0.917988	0.862541	0.85234	0.961679	0.917988	0.862541	1.13512	1.15139	0.981538	-0.0268834	0.297445	0.520856	translational_only	NA	NA	-1	2	1	2	2306	161	855	0.42281
uc007eye.2	Sesn1	ENSMUST00000099931	9.08039	42	7.66745	21	10.3726	52	12.6505	47	5.80956	123	6.16179	132	10.6018	310	8.13491	189	1.56301	1.24435	0.978385	1.55508	1.56301	1.24435	0.978385	1.55508	1.37469	1.56513	0.902437	-0.148101	0.748968	0.00178276	both	NA	NA	-1	2	1	1	3182	448	1078	0.453803
uc007eyl.1	Foxo3	ENSMUST00000056974	18.5952	105	19.7393	66	14.5861	89	20.0937	91	5.69881	147	7.05338	184	5.09605	181	5.8113	164	3.26301	2.79857	2.86224	3.4577	3.26301	2.79857	2.86224	3.4577	0.904661	0.855331	1.04262	0.0602184	-0.135108	1	translational_only	NA	NA	-1	2	-1	2	2889	325	545	0.608515
uc007eyr.2	Snx3	ENSMUST00000019939	199.073	263	94.392	74	157.494	226	117.541	125	223.149	1335	195.064	1191	161.481	1340	205.054	1352	0.892107	0.483903	0.975313	0.573222	0.892107	0.483903	0.975313	0.573222	0.937201	0.87643	1.12538	0.170413	-0.0940468	1	translational_only	0.88862	0.999545	1	2	-1	2	1377	277	611	0.47785
uc007eyv.2	Ostm1	ENSMUST00000040718	13.4864	38	16.7822	28	25.2135	77	33.58	76	8.22695	106	12.1962	159	11.0035	196	12.0115	170	1.6393	1.37602	2.29141	2.79565	1.6393	1.37602	2.29141	2.79565	1.94239	1.12691	1.68707	0.754522	0.269823	0.818134	translational_only	NA	NA	-1	2	1	2	3009	68	1924	0.435028
uc007eyx.2	Sec63	ENSMUST00000019937	54.8999	351	42.7724	162	60.5562	420	58.2223	299	18.7502	548	17.1294	507	28.9279	1163	23.8427	764	2.92797	2.49702	2.09335	2.44193	2.92797	2.49702	2.09335	2.44193	1.21609	1.47077	0.835998	-0.258428	0.650926	0.000967243	both	0.173589	0.999545	-1	2	1	1	6032	269	3480	0.392076
uc007ezi.2	Pdss2	ENSMUST00000095725	7.75583	26	7.55653	15	16.5133	60	14.8548	40	6.78325	104	7.21357	112	17.0014	360	12.8492	216	1.14338		0.971293	1.15609	1.14338	1.04754	0.971293	1.15609	2.04855	2.13267	0.970997	-0.0424611	1.19339	1.17098e-07	both	NA	NA	-1	2	1	1	1773	276	291	0.503666
uc007ezk.1	1700021F05Rik	ENSMUST00000019932	16.1134	32	13.6061	16	13.0084	28	15.0453	24	32.562	296	33.0512	304	49.8535	625	42.0035	419	0.494852	0.411666	0.260932	0.358191	0.494852	0.411666	0.260932	0.358191	0.943951	1.39998	0.682968	-0.55011	0.584073	0.0048079	both	0.0346177	0.816541	-1	-1	1	1	898	67	108	0.491091
uc007ezn.1	Qrsl1	ENSMUST00000020012	4.08655	18	4.9843	13	10.6828	51	9.32721	33	11.1668	225	10.343	211	18.5068	515	19.8547	439	0.365956	0.481903	0.577234	0.469773	0.365956	0.481903	0.577234	0.469773	2.20596	1.78345	1.23488	0.304376	0.930286	4.28869e-07	both	0.941068	0.999545	1	2	1	1	1970	99	293	0.489848
uc007ezq.2	Aim1	ENSMUST00000020017	11.4682	164	11.9275	101	24.5168	380	25.769	296	5.77466	378	5.61881	372	12.9079	1166	11.2091	805	1.98595	2.12278	1.89937	2.29894	1.98595	2.12278	1.89937	2.29894	2.14936	2.11673	1.0218	0.0311143	1.17985	9.24095e-12	both	0.879603	0.999545	-1	2	1	1	7416	778	1562	0.510518
uc007ezt.2	Atg5	ENSMUST00000039286	18.8351	43	16.2742	22	16.9738	42	20.1769	37	26.4114	276	28.6563	303	23.0323	332	26.5971	305	0.713143	0.567909	0.736955	0.758612	0.713143	0.567909	0.736955	0.758612	1.05814	0.901244	1.16745	0.223363	-0.055929	1	translational_only	0.883864	0.999545	1	2	-1	2	2379	304	1247	0.441782
uc007ezx.1	Prep	ENSMUST00000099858	99.0834	592	68.4023	242	160.907	1042	123.771	594	62.7107	1711	66.7005	1844	98.3043	3699	109.032	3266	1.58001	1.02551	1.63683	1.13518	1.58001	1.02551	1.63683	1.13518	1.69972	1.60215	1.0639	0.0893592	0.775772	2.73022e-06	both	0.94691	0.999545	1	2	1	1	2719	117	469	0.485473
uc007fad.2	Hace1	ENSMUST00000037044	7.69868	59	1.98327	9	6.74188	56	5.52327	34	6.67303	234	6.14184	218	7.49258	363	7.79617	300	1.1537	0.322912	0.899808	0.70846	1.1537	0.322912	0.899808	0.70846	1.26681	1.19305	1.08916	0.123216	0.351205	0.191707	translational_only	0.773448	0.999545	1	2	1	2	3785	246	809	0.429326
uc007fak.2	Ascc3	ENSMUST00000035606	9.56822	178	7.71625	85	11.5096	232	10.5736	158	6.34626	540	6.51899	561	10.0044	1173	9.31949	869	1.50769	1.18366	1.15045	1.13457	1.50769	1.18366	1.15045	1.13457	1.27763	1.50202	0.849021	-0.236127	0.682763	8.98915e-05	both	0.230349	0.999545	-1	2	1	1	7477	271	609	0.421827
uc007fbd.2	Dcbld1	ENSMUST00000069004	4.50453	19	3.20304	8	5.90593	27	6.19824	21	7.14755	138	7.11521	139	6.33786	169	8.21259	174	0.630219	0.450167	0.931849	0.754723	0.630219	0.450167	0.931849	0.754723	1.57043	1.02017	1.56108	0.642546	0.119186	1	translational_only	NA	NA	-1	2	1	2	3025	132	1381	0.480992
uc007fbg.2	Gopc	ENSMUST00000020008	25.2675	98	19.1586	44	23.7884	100	19.5803	61	8.16745	145	8.12767	146	12.6024	309	7.64817	149	3.09368	2.35721	1.8876	2.56013	3.09368	2.35721	1.8876	2.56013	0.976197	1.24274	0.815963	-0.293424	0.418294	0.405564	translational_only	NA	NA	-1	2	1	2	4317	226	2699	0.428538
uc007fbi.2	Nus1	ENSMUST00000023830	80.9481	199	56.9519	83	107.958	286	97.6813	192	63.3242	697	68.199	764	71.8822	1085	66.8217	809	1.27831	0.835084	1.50187	1.46182	1.27831	0.835084	1.50187	1.46182	1.49122	1.0546	1.40234	0.487833	0.167068	1	translational_only	0.1494	0.999545	1	2	1	2	4614	195	3525	0.397919
uc007fbq.1	Mcm9	ENSMUST00000075540	3.02831	33	2.01468	13	2.37069	28	2.17123	19	1.70762	85	1.70663	86	1.91612	132	1.88272	103			1.23724		1.77341	1.1805	1.23724	1.15324	0.900639	1.11264	0.809259	-0.305327	0.254407	0.853201	translational_only	NA	NA	-1	2	1	2	3873	0	0	0.512006
uc007fbr.1	Asf1a	ENSMUST00000020004	40.6719	68	29.1939	29	64.1222	116	52.7792	71	66.4	503	59.7814	459	92.9695	971	108.377	904	0.612529	0.488345	0.689712	0.486995	0.612529	0.488345	0.689712	0.486995	1.67323	1.59569	1.06888	0.0961054	0.770393	3.45893e-05	both	0.755365	0.999545	-1	2	1	1	2182	229	1338	0.373969
uc007fbw.1	Man1a	ENSMUST00000003843	1.45244	8	2.75947	9	17.0858	102	14.2397	63	1.66586	42	2.03839	52	12.5566	437	11.5663	320			1.3607	1.23114	0.871883	1.35375	1.3607	1.23114	7.43738	6.5122	1.16455	0.219766	2.79856	6.39085e-40	both	NA	NA	-1	2	1	1	3889	517	1404	0.493443
uc007fcd.2	Gja1	ENSMUST00000068581	425.98	1328	366.908	681	749.156	2490	739.229	1836	173.827	2413	185.577	2609	371.409	6908	295.794	4468	2.45059	1.97711	2.01706	2.49914	2.45059	1.97711	2.01706	2.49914	1.87717	1.85641	1.01999	0.0285501	0.960441	3.67205e-08	both	0.899087	0.999545	-1	2	1	1	3105	232	1724	0.443478
uc007fck.2	Hsf2	ENSMUST00000079833	16.8327	73	12.8505	33	25.9549	122	19.8077	69	14.6686	291	14.6869	295	21.9198	599	21.8162	474	1.14753	0.874965	1.18408	0.907933	1.14753	0.874965	1.18408	0.907933	1.5417	1.48987	1.03437	0.0487593	0.668904	0.000282971	both	0.827527	0.999545	-1	2	1	1	2623	124	945	0.357225
uc007fcm.3	Serinc1	ENSMUST00000020027	164.345	623	108.175	243	274.541	1128	211.341	644	90.5671	1568	101.478	1779	178.35	4239	149.28	2834	1.81462	1.066	1.53934	1.41573	1.81462	1.066	1.53934	1.41573	1.78292	1.70601	1.02585	0.0368147	0.863348	8.96906e-07	both	0.960373	0.999545	-1	2	1	1	2878	134	1382	0.407922
uc007fcx.1	Gcc2	ENSMUST00000057659	4.5752	65	3.92271	33	7.46833	115	6.74746	77	2.19939	143	2.20409	145	4.90098	440	3.74148	267	2.08021	1.77975	1.52384	1.80342	2.08021	1.77975	1.52384	1.80342	1.67286	1.96265	0.861995	-0.214249	1.07407	6.36843e-07	both	NA	NA	-1	2	1	1	6511	40	1428	0.410229
uc007fda.2	Lims1	ENSMUST00000020078	88.8249	294	44.9	88	92.8241	333	70.0205	186	31.5108	477	34.407	527	27.8621	582	33.8924	563	2.81887	1.30497	3.33155	2.06596	2.81887	1.30497	3.33155	2.06596	1.21776	0.936841	1.30886	0.388308	0.000840573	1	translational_only	0.0809672	0.939082	1	2	1	2	4473	46	3236	0.330651
uc007fdd.1	Ranbp2	ENSMUST00000003310	17.4729	451	16.0777	246	36.3171	1015	36.1302	749	7.74789	914	8.14774	972	23.6892	3832	21.719	2802	2.25518	1.97327	1.53307	1.66353	2.25518	1.97327	1.53307	1.66353	2.15935	2.85664	0.755975	-0.40359	1.60492	6.1051e-25	both	0.0576839	0.929969	-1	2	1	1	9476	128	186	0.4103
uc007fdk.2	Sh3rf3	ENSMUST00000153031	8.24262	61	9.81251	43	5.61018	45	7.57009	45	5.55191	188	5.71833	196	2.39486	112	2.3673	88	1.48465	1.71598	2.34259	3.19777	1.48465	1.71598	2.34259	3.19777	0.730002	0.422543	1.73103	0.791629	-1.14353	2.27103e-08	both	NA	NA	-1	2	-1	-1	5781	216	2928	0.528974
uc007fdm.1	42623	ENSMUST00000165971	33.0238	125	17.4003	39	27.5438	113	24.6679	75	14.1617	245	12.1019	212	20.0358	478	13.4948	256	2.33191	1.43781	1.37473	1.82795	2.33191	1.43781	1.37473	1.82795	1.03545	1.27669	0.849581	-0.235177	0.451927	0.188193	translational_only	0.236578	0.999545	-1	2	1	2	1821	439	23	0.468973
uc007fdo.2	P4ha1	ENSMUST00000009789	85.9169	385	77.2588	205	107.066	520	78.3466	282	39.4899	810	38.3056	795	69.6649	1971	38.0745	857	2.17567	2.0169	1.53687	2.05772	2.17567	2.0169	1.53687	2.05772	1.13627	1.38491	0.85737	-0.222011	0.56791	0.10347	translational_only	0.192907	0.999545	-1	2	1	2	4043	208	2230	0.422211
uc007fdt.3	Mcu	ENSMUST00000020312	55.8317	163	41.6488	72	57.8327	183	63.9644	150	22.5239	301	24.7751	335	24.3277	449	27.7539	407	2.47878	1.68107	2.37724	2.3047	2.47878	1.68107	2.37724	2.3047	1.24945	1.10111	1.12551	0.170574	0.234601	0.649533	translational_only	0.56688	0.999545	1	2	1	2	2872	22	1797	0.480153
uc007fea.1	Dnajb12	ENSMUST00000146590	48.4054	152	34.4196	64	66.9906	228	76.914	194	36.7339	528	40.3614	587	41.5086	824	50.3211	793	1.31773	0.852787	1.6139	1.52846	1.31773	0.852787	1.6139	1.52846	1.73745	1.19112	1.44775	0.533809	0.347707	0.185022	translational_only	0.102203	0.989559	1	2	1	2	1774	87	556	0.544532
uc007fee.1	Ddit4	ENSMUST00000020308	45.4408	86	38.37	43	57.0377	117	65.781	100	54.0688	467	50.9576	446	54.0714	645	60.7578	575	0.840424	0.752978	1.05486	1.08267	0.840424	0.752978	1.05486	1.08267	1.46543	1.09334	1.34149	0.423836	0.22251	0.668001	translational_only	0.366304	0.999545	1	2	1	2	1685	134	861	0.575668
uc007fef.1	Anapc16	ENSMUST00000182898	72.5101	64	30.6136	16	37.6314	36	40.9044	29	142.492	572	129.331	527	107.337	597	119.024	526	0.508872	0.236708	0.350592	0.343665	0.508872	0.236708	0.350592	0.343665	0.761568	0.832751	0.931164	-0.102892	-0.1656	1	translational_only	0.461366	0.999545	-1	2	-1	2	1329	182	814	0.475546
uc007fei.2	Ascc1	ENSMUST00000164083	13.1295	39	8.52808	15	10.5607	34	10.8971	26	14.8707	202	14.6829	202	13.4987	253	12.8683	192	0.882911	0.580816	0.782346	0.846818	0.882911	0.580816	0.782346	0.846818	0.990774	0.892175	1.11302	0.154485	-0.0663208	1	translational_only	0.994713	0.999801	-1	2	-1	2	1475	114	290	0.51661
uc007ffb.1	Slc29a3	ENSMUST00000117513	9.54691	38	10.1828	24	14.6032	63	13.7621	44	3.62248	66	3.41741	63	4.01385	101	3.65122	73			3.63821		2.63546	2.97968	3.63821	3.76919	1.4377	1.0888	1.31918	0.399644	0.224559	1	translational_only	NA	NA	-1	2	1	2	5240	48	3764	0.244847
uc007ffe.1	Unc5b	ENSMUST00000077925	55.4169	441	57.4495	271	80.0859	691	90.9906	581	33.6514	1221	35.106	1287	37.7241	1885	44.283	1755	1.64679	1.63646	2.12294	2.05475	1.64679	1.63646	2.12294	2.05475	1.51574	1.1927	1.27243	0.347581	0.346673	0.135731	translational_only	0.255706	0.999545	1	2	1	2	5867	416	2613	0.575081
uc007ffk.3	Sgpl1	ENSMUST00000122259	55.7696	266	44.9672	127	65.7694	340	52.7255	202	24.1842	528	24.3687	538	25.968	783	25.2258	604	2.30603	1.84528	2.53271	2.09014	2.30603	1.84528	2.53271	2.09014	1.17628	1.05439	1.11359	0.155214	0.174379	0.951592	translational_only	0.629346	0.999545	1	2	1	2	4142	209	2226	0.48817
uc007ffx.2	Pald1	ENSMUST00000020289	7.59741	55	5.83202	25	3.69743	29	5.84703	34	6.22146	206	5.91228	198	3.2133	147	4.59436	167	1.22116	0.986425	1.15067	1.27265	1.22116	0.986425	1.15067	1.27265	0.710712	0.643466	1.09772	0.134515	-0.546578	0.0545943	translational_only	NA	NA	-1	2	-1	2	4274	261	1433	0.560833
uc007fga.1	Eif4ebp2	ENSMUST00000020288	88.8885	86	76.8026	44	87.7332	92	110.662	86	52.8379	234	51.9973	233	51.0108	312	59.2618	288	1.68229	1.47705	1.71989	1.86734	1.68229	1.47705	1.71989	1.86734	1.19738	1.05187	1.13544	0.18325	0.167305	1	translational_only	0.707015	0.999545	1	2	1	2	1786	123	1300	0.517357
uc007fge.1	Ppa1	ENSMUST00000020286	137.515	319	76.2986	108	198.484	496	154.851	291	178.679	1733	200.411	1930	384.524	4635	340.171	3432	0.769622	0.380711	0.516182	0.455215	0.769622	0.380711	0.516182	0.455215	1.65254	1.91168	0.844448	-0.24392	0.930788	6.97416e-09	both	0.404823	0.999545	-1	2	1	1	1292	107	315	0.482972
uc007fgg.1	Sar1a	ENSMUST00000020285	236.885	386	130.586	126	248.001	438	210.105	275	156.349	1152	163.052	1222	157.22	1583	156.454	1265	1.5151	0.800888	1.57742	1.34292	1.5151	0.800888	1.57742	1.34292	1.24664	0.982067	1.26095	0.334507	0.0600878	1	translational_only	0.278235	0.999545	1	2	1	2	2602	109	1896	0.45196
uc007fgh.2	Tysnd1	ENSMUST00000020284	17.8211	85	15.5792	44	8.70477	45	10.1797	39	33.9404	741	34.4491	761	12.5694	379	14.1916	340	0.525071	0.452238	0.692535	0.717304	0.525071	0.452238	0.692535	0.717304	0.565397	0.391303	1.44257	0.528645	-1.25799	1.02027e-13	both	0.316988	0.999545	1	2	-1	-1	2286	57	522	0.63867
uc007fgl.1	Aifm2	ENSMUST00000080099	3.78061	12	2.12822	4	7.84825	27	4.70668	12	6.74511	98	6.53606	96	11.9107	239	13.2342	211			0.658922	0.355645	0.560496	0.325612	0.658922	0.355645	2.12478	1.89328	1.14497	0.19531	1.0155	1.41868e-06	both	NA	NA	-1	2	1	1	1328	104	81	0.556476
uc007fgm.1	H2afy2	ENSMUST00000020283	8.85488	25	9.54696	17	4.37351	14	2.89523	7	10.2014	100	11.6186	116	4.04907	63	5.30971	67		0.821696			0.868006	0.821696	1.08013	0.545271	0.395	0.428908	0.961943	-0.0559765	-0.923402	0.00059436	both	NA	NA	-1	2	-1	-1	1910	141	650	0.520419
uc007fgv.1	Tspan15	ENSMUST00000047883	2.8639	7	0	0	10.1918	27	6.6215	13	4.64778	52	5.12348	58	11.1961	173	13.195	162			0.910303	0.501818	0.616186	0	0.910303	0.501818	5.87078	2.49621	2.29171	1.19643	1.41036	1.16519e-09	both	NA	NA	-1	2	1	1	3605	103	2617	0.42552
uc007fgz.2	Hk1	ENSMUST00000116238	25.0245	199	30.1348	142	58.3886	502	60.5162	386	21.7324	786	22.2276	814	43.8132	2154	36.7486	1447	1.15148	1.35573	1.33267	1.64676	1.15148	1.35573	1.33267	1.64676	2.15566	1.83261	1.18834	0.24895	0.954149	3.0802e-08	both	0.587073	0.999545	1	2	1	1	4100	208	1054	0.526829
uc007fhd.1	Supv3l1	ENSMUST00000020273	13.2615	87	9.26726	36	11.9542	85	16.1304	85	17.6571	530	18.0356	548	21.6323	896	22.5171	742	0.751058	0.513831	0.552608	0.716362	0.751058	0.513831	0.552608	0.716362	1.24661	1.23693	1.00323	0.0046473	0.40332	0.0510006	translational_only	0.559939	0.999545	-1	2	1	2	2390	8	42	0.496653
uc007fhf.2	Vps26a	ENSMUST00000092473	42.0579	126	16.9112	30	54.2024	176	44.049	106	19.4702	267	18.6838	259	37.0296	698	32.0605	482	2.16011	0.905128	1.46376	1.37394	2.16011	0.905128	1.46376	1.37394	1.66615	1.81082	0.925766	-0.11128	0.952028	2.40395e-07	both	0.679896	0.999545	-1	2	1	1	3104	122	1902	0.395296
uc007fhk.1	Kif1bp	ENSMUST00000065887	20.4417	106	9.11895	28	22.9525	129	23.2882	97	19.264	457	18.539	445	22.25	727	20.8585	543	1.06113	0.491881	1.03157	1.11648	1.06113	0.491881	1.03157	1.11648	1.56427	1.14035	1.38315	0.467961	0.28568	0.32189	translational_only	0.229343	0.999545	1	2	1	2	2472	80	538	0.510113
uc007fhn.1	Ddx21	ENSMUST00000045866	69.999	441	45.9013	184	130.092	860	100.577	514	28.2457	767	26.7362	743	85.5745	2591	51.56	1384	2.47821	1.71682	1.52022	1.95069	2.47821	1.71682	1.52022	1.95069	1.99024	2.49418	0.827385	-0.27337	1.16191	7.31231e-08	both	0.497687	0.999545	-1	2	1	1	4743	84	2103	0.46089
uc007fja.2	Ccar1	ENSMUST00000020268	31.6261	305	20.0969	115	32.5469	340	29.6999	230	10.6713	469	10.7908	480	16.3591	988	15.2859	737	2.96367	1.86242	1.98952	1.94295	2.96367	1.86242	1.98952	1.94295	1.20346	1.47447	0.814838	-0.295414	0.654182	0.000227562	both	0.179142	0.999545	-1	2	1	1	4478	202	835	0.410898
uc007fjh.1	Slc25a16	ENSMUST00000044977	10.1203	28	7.32473	12	10.3377	31	13.9492	31	11.5284	146	9.75488	125	8.06147	141	6.26021	87	0.877854	0.750879	1.28236		0.877854	0.750879	1.28236	2.22823	1.3922	0.672907	2.15541	1.10796	-0.464771	0.151735	translational_only	NA	NA	-1	2	-1	2	3141	119	2023	0.380452
uc007fjj.2	Dna2	ENSMUST00000131422	2.12003	19	1.69592	9	3.39728	33	2.63934	19	1.97449	81	2.2887	95	2.40042	136	2.26581	102			1.41528		1.07371	0.740999	1.41528	1.16485	1.58194	1.09454	1.42179	0.507712	0.230002	0.971092	translational_only	NA	NA	-1	2	1	2	4122	64	869	0.491752
uc007fjo.1	Hnrnph3	ENSMUST00000020263	19.2875	55	14.7764	25	37.6814	116	40.2855	92	14.0267	180	9.11881	119	34.2562	601	17.2547	242	1.37506	1.62043	1.09999	2.33476	1.37506	1.62043	1.09999	2.33476	2.28884	2.22553	1.14664	0.197412	1.23917	0.000563188	both	NA	NA	-1	2	1	1	2168	153	974	0.435424
uc007fkd.2	Herc4	ENSMUST00000020258	10.0932	90	9.09951	48	15.422	149	11.4523	82	7.51614	306	8.27005	341	14.3799	807	10.4398	467	1.34287	1.1003	1.07247	1.09699	1.34287	1.1003	1.07247	1.09699	1.40023	1.57224	0.887969	-0.171419	0.751821	0.000805981	both	0.325101	0.999545	-1	2	1	1	4043	476	393	0.418748
uc007fke.2	Sirt1	ENSMUST00000120239	7.26011	45	5.7165	21	11.0051	74	8.43209	42	4.7935	136	4.77014	137	7.25448	284	6.16973	192	1.51458	1.19839	1.51701	1.36669	1.51458	1.19839	1.51701	1.36669	1.49787	1.40367	1.06293	0.0880485	0.589127	0.01209	both	NA	NA	-1	2	1	1	3910	65	1631	0.384143
uc007fkk.1	Lrrtm3	ENSMUST00000105439	3.68215	18	2.0728	6	0.943688	5	0.509346	2	8.40175	188	7.59688	172	0.9384	29	1.18104	29	0.43826	0.272848			0.43826	0.272848	1.00564	0.431271	0.252484	0.132476	2.02066	1.01482	-2.82758	4.21282e-31	both	NA	NA	-1	2	-1	-1	3852	542	1561	0.438993
uc007flz.2	Ado	ENSMUST00000075686	56.6334	120	69.3405	87	47.5255	109	56.9163	97	61.5514	593	66.0699	638	40.6522	538	44.8263	472	0.9201	1.0495	1.16908	1.26971	0.9201	1.0495	1.16908	1.26971	0.829076	0.669782	1.23821	0.30826	-0.48151	0.0159562	both	0.534414	0.999545	1	2	-1	-1	4445	182	3492	0.451294
uc007fmd.1	Rtkn2	ENSMUST00000105437	2.3724	12	2.00324	6	2.73606	15	3.19965	13	1.12295	26	1.7928	42	3.81741	122	2.36152	60			0.716732		2.11264	1.11738	0.716732	1.35491	1.35654	2.11915	0.641371	-0.640769	1.18998	0.00140516	both	NA	NA	-1	2	1	1	3932	176	1947	0.429552
uc007fmh.1	Arid5b	ENSMUST00000020106	32.9961	331	33.3331	198	32.1908	350	33.26	268	12.5983	578	14.0373	652	13.4065	849	14.4162	726	2.61909	2.37462	2.40113	2.30712	2.61909	2.37462	2.40113	2.30712	0.986757	1.04457	0.942838	-0.084918	0.159453	1	translational_only	0.572539	0.999545	-1	2	1	2	4494	16	911	0.505118
uc007fmr.1	Cdk1	ENSMUST00000020099	217.192	494	116.274	164	265.758	647	226.217	421	433.719	3645	405.811	3488	529.587	5749	612.522	5379	0.500767	0.286522	0.501821	0.36932	0.500767	0.286522	0.501821	0.36932	1.47534	1.36042	1.10651	0.146013	0.450934	0.0227141	both	0.896152	0.999545	1	2	1	1	2860	103	1863	0.438112
uc007fmx.1	Ank3	ENSMUST00000182884	5.06273	84	4.98744	49	3.89253	70	3.75234	50	2.56757	195	2.56359	197	1.74498	183	1.94415	162	1.9718	1.94549	2.2307	1.93007	1.9718	1.94549	2.2307	1.93007	0.760672	0.718966	1.06216	0.0869964	-0.381776	0.183727	translational_only	0.929084	0.999545	1	2	-1	2	10025	514	3625	0.474713
uc007fnx.2	Fam13c	ENSMUST00000173042	11.0898	56	7.692	23	6.02945	33	4.68427	19	8.5661	198	7.43981	174	3.25784	104	3.58766	91	1.29461	1.0339	1.85075		1.29461	1.0339	1.85075	1.30566	0.570432	0.427686	1.35555	0.438879	-1.13079	2.01727e-07	both	NA	NA	-1	2	-1	-1	3279	104	1369	0.457762
uc007fog.2	Bicc1	ENSMUST00000143791	28.6381	236	25.8214	126	23.2876	208	23.2652	154	17.4173	657	15.9092	607	12.4705	649	12.615	522	1.64424	1.62305	1.86741	1.84425	1.64424	1.62305	1.86741	1.84425	0.854815	0.752722	1.13601	0.183971	-0.313324	0.224697	translational_only	0.681524	0.999545	1	2	-1	2	3101	18	149	0.540148
uc007fom.1	Tfam	ENSMUST00000092430	26.387	53	12.6297	15	37.7198	82	17.9749	29	16.7357	153	17.0564	158	22.7983	285	16.0939	161	1.5767	0.740468	1.65451	1.11687	1.5767	0.740468	1.65451	1.11687	1.42746	1.15093	1.19602	0.258244	0.296071	0.659563	translational_only	0.445404	0.999545	1	2	1	2	3918	104	3082	0.38489
uc007foo.2	Ube2d1	ENSMUST00000020085	22.563	27	11.2901	8	29.2985	38	17.6862	17	18.0739	99	17.1409	95	16.1652	122	20.5117	123			1.81244	0.862251	1.24838	0.658666	1.81244	0.862251	1.3879	1.04152	1.40253	0.488036	0.144342	1	translational_only	NA	NA	-1	2	1	2	1431	138	849	0.458421
uc007foq.1	Cisd1	ENSMUST00000045887	47.9085	37	24.702	12	41.66	35	28.1898	18	104.37	223	101.612	225	102.447	262	149.192	318	0.459024	0.243101	0.40665	0.188951	0.459024	0.243101	0.40665	0.188951	0.961981	1.22165	0.848283	-0.237383	0.197992	1	translational_only	0.485292	0.999545	-1	2	1	2	965	95	543	0.501554
uc007fos.1	Ipmk	ENSMUST00000079252	14.502	48	11.7453	23	10.035	36	13.9169	37	12.1551	184	9.7849	150	7.5988	159	7.94636	132	1.19308	1.20035	1.32061	1.75136	1.19308	1.20035	1.32061	1.75136	0.912549	0.70853	1.2835	0.360084	-0.400727	0.209922	translational_only	NA	NA	-1	2	-1	2	5417	159	4067	0.458003
uc007fqb.2	Bcr	ENSMUST00000164107	21.0731	226	16.3725	104	28.3898	330	30.6381	264	10.7404	526	9.80248	486	14.3635	971	15.3988	828	1.96204	1.67024	1.97652	1.98964	1.96204	1.67024	1.97652	1.98964	1.57637	1.44879	1.09192	0.126867	0.63109	0.000564862	both	0.796732	0.999545	1	2	1	1	6537	130	2594	0.54857
uc007fqe.2	Specc1l	ENSMUST00000105421	17.4836	165	12.5263	70	15.3488	157	17.2811	131	8.49564	367	6.72623	294	8.03589	479	7.40662	351	2.05795	1.8623	1.91004	2.3332	2.05795	1.8623	1.91004	2.3332	1.08731	1.01449	1.08239	0.114219	0.118053	1	translational_only	0.876696	0.999545	1	2	1	2	6062	184	2521	0.492247
uc007fqk.1	Gucd1	ENSMUST00000039796	10.1141	20	11.1024	13	12.1311	26	6.92535	11	21.2119	192	21.7283	199	11.5991	145	15.5043	154	0.476811	0.510962	1.04586	0.446673	0.476811	0.510962	1.04586	0.446673	0.898191	0.631189	1.51101	0.595511	-0.574391	0.0273058	both	NA	NA	-1	2	-1	-1	2910	126	2064	0.539863
uc007fqm.1	Snrpd3	ENSMUST00000020397	375.089	382	230.495	139	507.831	559	404.226	327	364.635	1629	326.526	1476	729.918	4360	493.027	2389	1.02867	0.705901	0.695738	0.819887	1.02867	0.705901	0.695738	0.819887	1.50608	1.76941	0.873775	-0.194667	0.886649	4.98921e-05	both	0.302606	0.999545	-1	2	1	1	604	105	118	0.480132
uc007fqx.1	Cabin1	ENSMUST00000001712	12.4798	231	12.5907	138	16.449	330	18.4962	275	11.4166	967	11.1182	953	12.5017	1462	14.8149	1377	1.09313	1.13245	1.31574	1.24849	1.09313	1.13245	1.31574	1.24849	1.39387	1.2122	1.15216	0.204345	0.373743	0.100022	translational_only	0.74312	0.999545	1	2	1	2	7460	462	434	0.563539
uc007fra.1	Ddt	ENSMUST00000001716	36.8215	35	8.88342	5	42.7086	44	36.6729	28	68.7207	299	72.4491	318	86.6276	519	110.497	526	0.535814	0.122616	0.493014	0.331891	0.535814	0.122616	0.493014	0.331891	1.73683	1.39636	1.25284	0.325198	0.574202	0.00933829	both	0.640842	0.999545	1	2	1	1	609	51	201	0.546798
uc007frc.2	Gstt1	ENSMUST00000001713	28.4007	56	18.7083	22	3.25673	7	1.88066	3	36.4734	324	40.3401	361	3.85072	48	4.86032	48	0.778667	0.463765			0.778667	0.463765	0.845746	0.386942	0.109053	0.113405	0.992157	-0.011359	-3.02777	1.2915e-45	both	NA	NA	-1	2	-1	-1	1037	88	226	0.541948
uc007ftm.2	Smarcb1	ENSMUST00000000925	80.8325	260	54.6037	104	94.3708	329	81.6674	211	122.295	1799	122.586	1823	122.276	2482	146.389	2361	0.660963	0.445431	0.771788	0.557879	0.660963	0.445431	0.771788	0.557879	1.29979	1.09712	1.2018	0.265198	0.229947	0.576769	translational_only	0.775616	0.999545	1	2	1	2	1657	219	280	0.552203
uc007fto.2	Mmp11	ENSMUST00000000924	15.3056	63	13.921	34	14.0924	63	15.3936	51	19.6774	371	24.132	461	14.3443	373	16.94	350	0.777826	0.576868	0.982442	0.908713	0.777826	0.576868	0.982442	0.908713	1.00887	0.714097	1.396	0.481301	-0.393233	0.151023	translational_only	0.294441	0.999545	1	2	-1	2	2288	49	760	0.548951
uc007ftw.2	Zfp280b	ENSMUST00000061617	7.1547	32	4.15346	11	7.45933	36	11.7279	42	3.53701	72	5.36793	110	5.40771	150	4.44942	98			1.37939	2.63582	2.02281	0.773755	1.37939	2.63582	1.69676	1.10693	1.43577	0.52182	0.234413	1	translational_only	NA	NA	-1	2	1	2	4874	193	3076	0.455273
uc007fup.1	Mcm3ap	ENSMUST00000170795	12.7123	212	11.3438	112	19.4776	352	18.5137	248	12.4315	948	13.0161	1005	18.8573	1983	17.399	1455	1.02259	0.871519	1.03289	1.06407	1.02259	0.871519	1.03289	1.06407	1.57928	1.42475	1.10709	0.146778	0.606736	0.00049498	both	0.960867	0.999545	1	2	1	1	6383	350	117	0.533918
uc007fuu.2	Col6a2	ENSMUST00000001181	142.587	1244	148.274	766	74.132	701	66.3537	465	160.945	6417	178.391	7199	75.147	4142	85.7405	3755	0.885933	0.831173	0.986494	0.77389	0.885933	0.831173	0.986494	0.77389	0.483001	0.474124	1.0252	0.0359105	-0.977861	2.53757e-09	both	0.740577	0.999545	-1	2	-1	-1	3729	167	457	0.594261
uc007fux.1	Col6a1	ENSMUST00000001147	185.358	1603	190.396	975	125.996	1181	128.985	896	186.831	7391	196.718	7869	124.045	6764	126.123	5468	0.992118	0.967866	1.01573	1.02269	0.992118	0.967866	1.01573	1.02269	0.678584	0.652248	1.04002	0.0566069	-0.52063	0.00212336	both	0.800089	0.999545	-1	2	-1	-1	3976	131	767	0.562123
uc007fuz.2	Pcbp3	ENSMUST00000105411	10.0257	31	7.6464	14	12.5899	42	11.6977	29	8.19379	113	10.6894	150	11.6536	218	14.9096	225	1.22357	0.715327	1.08035	0.784572	1.22357	0.715327	1.08035	0.784572	1.37435	1.40671	0.961845	-0.0561243	0.566502	0.0502677	translational_only	NA	NA	-1	2	1	2	2175	423	636	0.542529
uc007fvc.2	Slc19a1	ENSMUST00000144234	35.1624	151	23.2022	59	80.353	374	80.8833	279	38.2305	751	42.0931	835	80.8986	2189	82.8388	1781	0.919746	0.551212	0.993256	0.976394	0.919746	0.551212	0.993256	0.976394	2.76257	2.03847	1.33903	0.421184	1.12284	1.72722e-12	both	0.346579	0.999545	1	2	1	1	2254	89	626	0.565217
uc007fvg.1	Col18a1	ENSMUST00000072755	8.36655	108	6.93538	53	4.21793	59	5.0151	52	9.99836	590	10.6714	638	5.3107	433	5.85159	379	0.836792	0.649904	0.794231	0.857049	0.836792	0.649904	0.794231	0.857049	0.60339	0.54003	1.1107	0.151475	-0.793069	9.30301e-06	both	0.988132	0.999713	1	2	-1	-1	5628	29	1015	0.599502
uc007fvj.1	Pofut2	ENSMUST00000020493	47.0759	169	42.338	90	47.2888	184	63.1155	182	70.4644	1157	73.1947	1217	55.0345	1249	68.2661	1231	0.66808	0.57843	0.859258	0.924551	0.66808	0.57843	0.859258	0.924551	1.23476	0.858285	1.43104	0.517068	-0.123533	1	translational_only	0.291533	0.999545	1	2	-1	2	2219	23	906	0.574583
uc007fvp.2	Adarb1	ENSMUST00000098374	3.5603	21	1.14526	4	9.22886	59	6.54936	31	2.51981	68	2.12311	58	5.09788	190	5.36661	159			1.81033	1.22039	1.41293	0.539424	1.81033	1.22039	3.3531	2.25386	1.55235	0.634451	1.26713	1.66456e-08	both	NA	NA	-1	2	1	1	6556	395	4055	0.510372
uc007fvt.2	Fam207a	ENSMUST00000045454	37.1799	67	20.585	22	45.6389	89	40.6966	59	41.4406	337	42.5362	350	53.6044	603	59.7278	533	0.897186	0.483941	0.851402	0.681368	0.897186	0.483941	0.851402	0.681368	1.4946	1.34956	1.1098	0.150295	0.529669	0.00779742	both	0.967657	0.999713	1	2	1	1	2428	73	1695	0.54654
uc007fvx.1	Pttg1ip	ENSMUST00000009435	110.815	158	88.8342	75	185.071	286	143.199	164	116.374	758	125.484	827	131.737	1178	140.467	1004	0.952232	0.707932	1.40485	1.01945	0.952232	0.707932	1.40485	1.01945	1.64423	1.12547	1.46027	0.546239	0.263601	0.375339	translational_only	0.145756	0.999545	1	2	1	2	2247	55	1667	0.509123
uc007fwa.1	Ube2g2	ENSMUST00000174510	66.6956	90	23.7785	19	61.5356	90	47.052	51	50.3498	311	51.2015	320	51.344	438	60.4887	410	1.32464	0.464411	1.1985	0.777865	1.32464	0.464411	1.1985	0.777865	1.20021	1.10124	1.1047	0.143648	0.234086	0.659563	translational_only	0.713351	0.999545	1	2	1	2	1982	53	1431	0.539354
uc007fwn.1	1810043G02Rik	ENSMUST00000105397	12.6072	26	2.45665	3	4.92116	11	4.22568	7	18.9619	179	18.3215	175	11.8121	154	12.646	131	0.664871	0.134086	0.41662	0.334152	0.664871	0.134086	0.41662	0.334152	0.607204	0.656005	0.939691	-0.0897417	-0.512639	0.0353815	both	NA	NA	-1	2	-1	-1	1696	55	891	0.553656
uc007fwo.2	Pfkl	ENSMUST00000020522	89.6336	586	62.4042	242	72.3342	513	66.6491	350	79.7898	2364	81.3859	2443	80.7972	3283	72.8846	2380	1.12337	0.766769	0.895257	0.914448	1.12337	0.766769	0.895257	0.914448	0.914137	0.953505	0.957444	-0.0627398	0.0260634	1	translational_only	0.5472	0.999545	-1	2	1	2	3717	113	1261	0.534302
uc007fxj.1	D10Jhu81e	ENSMUST00000001242	32.1764	71	35.971	47	23.4151	56	32.7235	58	73.8584	746	64.1733	655	52.1736	725	60.2556	667	0.435649	0.560529	0.448792	0.543079	0.435649	0.560529	0.448792	0.543079	0.823782	0.814517	0.995676	-0.0062521	-0.203018	0.857646	translational_only	0.545667	0.999545	-1	2	-1	2	1363	39	523	0.574468
uc007fxk.1	Pwp2	ENSMUST00000042556	17.1646	133	15.0386	69	44.5492	374	38.7214	241	17.6562	626	18.7111	671	36.609	1790	34.0417	1323	0.972156	0.803726	1.21689	1.13747	0.972156	0.803726	1.21689	1.13747	2.58579	1.9427	1.32574	0.406801	1.05457	7.64933e-11	both	0.344842	0.999545	1	2	1	1	3871	61	1050	0.532162
uc007fxm.1	Trappc10	ENSMUST00000000384	15.3403	163	14.7811	93	16.5024	190	19.801	169	18.0918	879	18.5621	913	15.9504	1070	18.3151	977	0.847917	0.796305	1.03461	1.08113	0.847917	0.796305	1.03461	1.08113	1.20523	0.934837	1.28677	0.363756	-0.000816267	1	translational_only	0.477262	0.999545	1	2	-1	2	5047	140	1130	0.50208
uc007fxq.1	Agpat3	ENSMUST00000166360	38.2148	120	46.2514	86	73.1608	249	79.6892	201	55.3594	795	55.9696	814	78.07	1547	88.6349	1393	0.690303	0.826366	0.937118	0.899073	0.690303	0.826366	0.937118	0.899073	1.8096	1.49741	1.21067	0.275809	0.675901	0.000109942	both	0.683581	0.999545	1	2	1	1	3439	184	2124	0.555394
uc007fxs.1	Rrp1	ENSMUST00000062678	117.424	483	92.7524	227	126.146	562	118.914	391	55.2306	1012	50.7923	949	111.63	2765	57.805	1159	2.12606	1.82611	1.13004	2.05717	2.12606	1.82611	1.13004	2.05717	1.16598	1.59809	0.806444	-0.310354	0.748041	0.0191137	both	0.0732	0.93535	-1	2	1	1	2008	91	432	0.493028
uc007fxt.1	Cstb	ENSMUST00000005185	281.765	220	166.545	77	275.327	233	215.254	135	616.106	2186	559.143	2022	517.066	2506	615.896	2398	0.457332	0.297857	0.53248	0.349497	0.457332	0.297857	0.53248	0.349497	1.09429	0.964018	1.16789	0.223904	0.0314245	1	translational_only	0.959086	0.999545	1	2	1	2	602	122	183	0.493355
uc007fxu.2	Pdxk	ENSMUST00000041616	11.146	28	5.25961	8	16.3615	45	8.38708	17	10.0208	109	13.3088	147	8.44918	123	11.8296	137	1.11228	0.395196	1.93646	0.708988	1.11228	0.395196	1.93646	0.708988	1.50854	0.869229	1.75488	0.811372	-0.16003	1	translational_only	NA	NA	-1	2	-1	2	5094	101	4054	0.508441
uc007fxv.2	Ilvbl	ENSMUST00000105384	15.6227	83	14.6222	46	23.6181	136	18.7465	80	28.7022	698	31.1063	765	38.5985	1295	42.4415	1132	0.544302	0.470071	0.611892	0.441703	0.544302	0.470071	0.611892	0.441703	1.40072	1.35499	1.03867	0.0547311	0.534639	0.00415593	both	0.665534	0.999545	-1	2	1	1	2329	176	254	0.560326
uc007fyb.2	Syde1	ENSMUST00000040580	37.0734	230	31.5768	116	40.3026	271	44.3486	221	27.0939	768	24.6043	706	21.9523	859	24.3674	759	1.36833	1.28339	1.83592	1.81999	1.36833	1.28339	1.83592	1.81999	1.23308	0.895964	1.3787	0.463305	-0.061814	1	translational_only	0.150935	0.999545	1	2	-1	2	3288	75	999	0.560827
uc007fyg.2	Slc1a6	ENSMUST00000005490	16.1643	76	22.6287	63	24.5291	125	19.859	75	39.8277	852	43.6127	940	34.4149	1010	31.8478	744	0.405854	0.518855	0.712746	0.623558	0.405854	0.518855	0.712746	0.623558	1.14423	0.794133	1.44511	0.531175	-0.239063	0.514696	translational_only	0.326554	0.999545	1	2	-1	2	2089	193	210	0.559119
uc007fzh.1	Tpgs1	ENSMUST00000020552	38.4828	97	34.8398	52	38.4338	105	40.9946	83	84.7736	977	91.6551	1070	69.9889	1114	88.6974	1123	0.453949	0.380118	0.549142	0.462185	0.453949	0.380118	0.549142	0.462185	1.08327	0.899436	1.21253	0.278016	-0.0565233	1	translational_only	0.873259	0.999545	1	2	-1	2	1101	0	189	0.654859
uc007fzi.1	Cdc34	ENSMUST00000020550	8.41635	14	12.2406	13	32.0099	53	21.9225	27	146.891	447	119.1	387	271.177	936	322.332	884	0.0572965	0.102776	0.118041	0.0680123	0.0572965	0.102776	0.118041	0.0680123	2.61086	2.23131	1.1623	0.216984	0.934139	7.7523e-07	both	0.968287	0.999713	-1	2	1	1	1266	219	339	0.577409
uc007fzl.1	Bsg	ENSMUST00000067036	503.96	1621	312.074	597	679.264	2366	608.68	1574	993.951	14158	1026.26	14818	1240.55	23961	1570.75	24396	0.507026	0.304088	0.54755	0.387509	0.507026	0.304088	0.54755	0.387509	1.5783	1.39159	1.15281	0.205152	0.555997	0.00519796	both	0.934047	0.999545	1	2	1	1	1752	160	422	0.565639
uc007fzo.2	Polrmt	ENSMUST00000020580	9.02603	92	9.77546	59	13.9399	154	13.4355	110	13.1816	615	15.2094	718	22.9282	1477	24.9687	1278	0.684747	0.642727	0.607978	0.538095	0.684747	0.642727	0.607978	0.538095	1.45602	1.68705	0.863349	-0.211984	0.851499	8.6597e-07	both	0.240779	0.999545	-1	2	1	1	3762	29	109	0.608985
uc007fzr.3	Rnf126	ENSMUST00000047203	110.153	287	85.6516	132	131.873	372	146.373	306	134.208	1578	130.443	1557	135.875	2204	160.798	2077	0.820764	0.656621	0.970553	0.910288	0.820764	0.656621	0.970553	0.910288	1.42104	1.121	1.27309	0.348332	0.25929	0.423768	translational_only	0.511734	0.999545	1	2	1	2	1639	125	572	0.597926
uc007fzs.2	Fstl3	ENSMUST00000020575	17.4387	37	11.9393	15	6.95762	16	11.7353	20	22.9615	223	22.5914	222	5.59157	75	7.5065	80	0.759476	0.52849			0.759476	0.52849	1.24431	1.56336	0.636291	0.287536	2.17992	1.12427	-1.71201	1.43837e-15	both	NA	NA	-1	2	-1	-1	1953	27	1155	0.517665
uc007fzw.2	Palm	ENSMUST00000046945	26.2537	84	29.0302	55	28.8363	100	21.0115	54	32.2567	472	31.0692	460	18.8363	381	23.7067	381	0.813899	0.934371	1.53089	0.886312	0.813899	0.934371	1.53089	0.886312	0.901671	0.671811	1.38262	0.467409	-0.47863	0.0393349	both	0.26079	0.999545	1	2	-1	-1	2651	164	1335	0.605432
uc007gak.2	Med16	ENSMUST00000105378	24.2791	177	22.9335	99	24.5522	194	21.6878	127	24.2732	810	24.8877	840	17.4452	804	21.0547	771	1.00024	0.92148	1.40739	1.03007	1.00024	0.92148	1.40739	1.03007	0.9794	0.783141	1.26837	0.342978	-0.256438	0.495468	translational_only	0.440762	0.999545	1	2	-1	2	3218	43	577	0.565258
uc007gan.1	R3hdm4	ENSMUST00000045628	50.1694	109	39.6423	51	39.0687	92	33.2348	58	49.7737	495	54.5301	548	34.4097	472	38.1189	416	1.00795	0.72698	1.1354	0.871871	1.00795	0.72698	1.1354	0.871871	0.805057	0.69536	1.15698	0.210358	-0.427754	0.0512709	translational_only	0.764663	0.999545	1	2	-1	2	1821	46	986	0.545305
uc007gat.1	Wdr18	ENSMUST00000045247	70.1429	253	54.3122	116	119.456	467	111.831	324	90.4995	1493	84.0442	1404	161.202	3670	166.764	3019	0.775063	0.646234	0.741033	0.670593	0.775063	0.646234	0.741033	0.670593	1.8584	1.87899	0.993195	-0.00985067	1.00599	2.09055e-10	both	0.588254	0.999545	-1	2	1	1	2954	11	1647	0.56872
uc007gax.1	Tmem259	ENSMUST00000052885	60.3666	291	69.7161	199	109.67	573	126.031	488	131.432	2895	137.038	3047	167.187	5077	191.25	4620	0.4593	0.508735	0.65597	0.658984	0.4593	0.508735	0.65597	0.658984	1.81193	1.33511	1.35837	0.441881	0.514417	0.00472715	both	0.495286	0.999545	1	2	1	1	2223	199	299	0.581197
uc007gaz.1	Cnn2	ENSMUST00000004784	274.402	458	147.959	173	185.681	349	149.288	230	334.059	1726	305.477	1625	210.243	1410	250.577	1467	0.821415	0.484353	0.883172	0.595776	0.821415	0.484353	0.883172	0.595776	0.793088	0.720554	1.13263	0.179673	-0.402998	0.105943	translational_only	0.61082	0.999545	1	2	-1	2	1782	78	786	0.521324
uc007gbi.1	Polr2e	ENSMUST00000004786	91.8373	159	79.0102	81	163.069	306	120.086	167	320.653	2537	322.623	2587	410.11	4474	480.405	4171	0.286407	0.244899	0.397624	0.249968	0.286407	0.244899	0.397624	0.249968	1.65736	1.38434	1.21887	0.28554	0.564078	0.00187154	both	0.987681	0.999713	-1	2	1	1	1008	20	355	0.569444
uc007gbn.1	Sbno2	ENSMUST00000042771	16.8494	192	17.3356	117	26.4699	327	22.949	210	17.9481	935	18.8911	997	25.939	1863	29.398	1681	0.938788	0.917659	1.02047	0.780631	0.938788	0.917659	1.02047	0.780631	1.44563	1.50213	0.970186	-0.0436666	0.68213	9.14502e-05	both	0.564304	0.999545	-1	2	1	1	4640	188	402	0.583836
uc007gby.2	Atp5d	ENSMUST00000003156	431.312	593	270.231	220	591.21	881	449.13	496	752.143	4714	770.002	4883	847.631	7337	1021.21	7038	0.573445	0.350949	0.697485	0.4398	0.573445	0.350949	0.697485	0.4398	1.48293	1.22777	1.2303	0.299015	0.394953	0.0642717	translational_only	0.748894	0.999545	1	2	1	2	931	151	273	0.611171
uc007gcf.1	1600002K03Rik	ENSMUST00000041882	5.77593	5	7.80347	4	19.1846	18	25.9716	18	24.6298	96	19.4596	77	41.2402	222	52.3709	224			0.465193	0.495917	0.23451	0.401008	0.465193	0.495917	3.32535	2.12321	1.51232	0.596767	1.17561	6.92769e-07	both	NA	NA	-1	2	1	1	651	22	302	0.563748
uc007gch.1	Mum1	ENSMUST00000020365	21.6136	124	21.4884	73	23.9619	149	21.9169	101	30.5085	800	25.6919	682	35.3719	1281	34.2827	986	0.708445	0.83639	0.677427	0.6393	0.708445	0.83639	0.677427	0.6393	1.06442	1.2394	0.852342	-0.230496	0.406163	0.0692359	translational_only	0.232803	0.999545	-1	2	1	2	3717	167	1501	0.542911
uc007gci.1	Ndufs7	ENSMUST00000020361	156.204	289	110.448	121	201.468	404	193.794	288	276.87	2334	287.145	2453	361.388	4201	411.663	3814	0.56418	0.384642	0.557484	0.47076	0.56418	0.384642	0.557484	0.47076	1.48231	1.37062	1.08371	0.115974	0.551158	0.00206402	both	0.821095	0.999545	-1	2	1	1	758	24	59	0.60686
uc007gcj.2	Gamt	ENSMUST00000105363	14.3444	28	15.573	18	8.0353	17	5.74011	9	27.5323	246	29.7546	269	9.64344	119	11.7289	115	0.521003	0.523382	0.83324		0.521003	0.523382	0.83324	0.489398	0.460448	0.373076	1.26643	0.340765	-1.33105	4.0951e-11	both	NA	NA	-1	2	-1	-1	944	67	166	0.563559
uc007gcm.2	Dazap1	ENSMUST00000105362	88.3717	300	75.1808	151	88.1309	324	88.7484	242	129.269	1997	127.204	1995	119.009	2537	125.823	2133	0.683628	0.591027	0.740542	0.705345	0.683628	0.591027	0.740542	0.705345	1.08148	0.954611	1.13434	0.181848	0.0272737	1	translational_only	0.970486	0.999713	1	2	1	2	2082	159	702	0.566282
uc007gcq.1	2310011J03Rik	ENSMUST00000020341	44.6148	39	9.65964	5	30.6085	29	38.4531	27	55.2319	221	53.5984	217	45.0583	249	47.5989	209	0.807774	0.180222	0.679308	0.807858	0.807774	0.180222	0.679308	0.807858	1.27245	0.851391	1.50524	0.589989	-0.135905	1	translational_only	0.141535	0.999545	1	2	-1	2	1659	236	1093	0.587703
uc007gcr.2	Pcsk4	ENSMUST00000147132	3.31913	6	1.86844	2	10.2078	20	11.0191	16	9.54734	79	9.91352	83	24.4522	279	28.7238	260			0.417459	0.383622	0.347649	0.188474	0.417459	0.383622	4.09188	2.73246	1.49421	0.579384	1.53945	1.31975e-13	both	NA	NA	-1	2	1	1	1202	498	44	0.612313
uc007gcs.2	Pcsk4	ENSMUST00000020340	3.26966	18	1.53304	5	5.03042	30	3.16763	14	2.58742	65	2.4442	62	5.51648	191	6.83026	188			0.911889	0.463765	1.26367	0.627215	0.911889	0.463765	1.70697	2.45383	0.727517	-0.458947	1.3843	1.87149e-09	both	NA	NA	-1	2	1	1	2514	23	523	0.606603
uc007gcz.1	Mex3d	ENSMUST00000105350	35.7345	213	39.8167	140	51.3653	332	65.8857	315	46.3726	1225	42.9008	1145	39.731	1441	48.9719	1421	0.770595	0.928111	1.29283	1.34538	0.770595	0.928111	1.29283	1.34538	1.55194	0.99361	1.55307	0.635119	0.0848443	1	translational_only	0.0750912	0.93535	1	2	1	2	3258	231	870	0.572744
uc007gdb.2	Mbd3	ENSMUST00000092295	135.956	320	109.836	154	146.294	375	123.853	235	283.282	3019	255.339	2740	296.073	4326	336.438	3925	0.479933	0.430157	0.494116	0.368131	0.479933	0.430157	0.494116	0.368131	1.09909	1.17431	0.94743	-0.0779083	0.325104	0.180819	translational_only	0.429283	0.999545	-1	2	1	2	1643	300	485	0.567864
uc007gds.1	Rexo1	ENSMUST00000057910	9.63423	97	15.4861	93	15.7943	171	20.2247	162	9.768	425	10.2358	447	12.0234	684	15.0302	689	0.986305	1.51293	1.31363	1.34561	0.986305	1.51293	1.31363	1.34561	1.43386	1.35242	1.06402	0.0895257	0.469077	0.0406803	both	0.832541	0.999545	1	2	1	1	5249	140	1467	0.599924
uc007gdt.1	Klf16	ENSMUST00000038558	33.1845	69	27.6147	34	29.3658	66	40.1703	67	23.5493	222	25.7888	247	16.1942	212	19.0354	198	1.40915	1.07081	1.81336	2.11029	1.40915	1.07081	1.81336	2.11029	1.1437	0.714046	1.58214	0.661881	-0.387451	0.166837	translational_only	0.0406906	0.870475	1	1	-1	2	2652	96	1800	0.594646
uc007gdv.2	Abhd17a	ENSMUST00000003436	37.5967	97	53.6746	82	69.4521	194	86.4691	179	199.095	2310	188.295	2213	208.299	3308	249.684	3179	0.188838	0.285055	0.333426	0.346314	0.188838	0.285055	0.333426	0.346314	1.70833	1.18223	1.43437	0.52042	0.3316	0.182548	translational_only	0.564406	0.999545	1	2	1	2	1473	351	189	0.573659
uc007gdx.1	Adat3	ENSMUST00000038411	5.15287	15	6.9617	12	17.4321	55	17.9622	42	10.1315	135	9.49392	128	17.0249	313	20.3119	297	0.508598	0.73328	1.02392	0.884322	0.508598	0.73328	1.02392	0.884322	2.92163	1.90247	1.53657	0.619718	1.02065	6.97685e-07	both	NA	NA	-1	2	1	1	1411	86	275	0.644933
uc007gdy.1	Scamp4	ENSMUST00000079883	50.4981	96	56.8539	64	68.9162	142	65.4873	100	65.9627	574	63.1475	556	50.9918	611	58.5398	559	0.765555	0.900334	1.35152	1.11868	0.765555	0.900334	1.35152	1.11868	1.25199	0.848357	1.48281	0.568332	-0.143541	1	translational_only	0.134671	0.999545	1	2	-1	2	1804	111	1000	0.577605
uc007geb.2	Csnk1g2	ENSMUST00000085435	56.5927	195	57.0163	117	45.7129	171	54.513	151	274.141	4196	243.461	3796	146.495	3102	190.506	3216	0.206437	0.23419	0.312043	0.286148	0.206437	0.23419	0.312043	0.286148	0.882199	0.651081	1.35759	0.44105	-0.522107	0.0166402	both	0.742536	0.999545	1	2	-1	-1	2259	316	695	0.587428
uc007geh.1	Mob3a	ENSMUST00000003438	66.1727	117	34.1123	36	37.7907	73	31.9802	46	61.9578	487	56.1378	445	18.8795	209	28.696	252	1.06803	0.607653	2.00168	1.11445	1.06803	0.607653	2.00168	1.11445	0.695725	0.402855	1.85962	0.895007	-1.19219	1.67021e-07	both	0.00752096	0.515334	1	1	-1	-1	2647	102	1891	0.454477
uc007gek.1	Ap3d1	ENSMUST00000020420	51.1899	518	39.0414	234	46.1353	506	40.208	327	35.6837	1651	34.1037	1597	34.4748	2198	30.7342	1560	1.43454	1.14478	1.33823	1.30825	1.43454	1.14478	1.33823	1.30825	0.956912	0.934396	1.02604	0.0370804	-0.00199224	1	translational_only	0.834526	0.999545	-1	2	-1	2	4730	220	910	0.535941
uc007ger.1	Plekhj1	ENSMUST00000036805	39.5249	53	25.1884	20	43.3475	63	43.6361	47	63.8369	391	65.3499	405	90.4624	762	113.91	764	0.619155	0.38544	0.479178	0.383077	0.619155	0.38544	0.479178	0.383077	1.34414	1.58199	0.858311	-0.220428	0.752716	0.000129282	both	0.247798	0.999545	-1	2	1	1	1260	452	313	0.587302
uc007gfc.1	Sppl2b	ENSMUST00000035597	17.5095	85	17.0462	49	26.608	140	26.9277	105	13.6888	304	14.9887	337	18.1604	557	20.382	497	1.27911	1.13727	1.46517	1.32115	1.27911	1.13727	1.46517	1.32115	1.54926	1.344	1.15309	0.205507	0.522587	0.0108864	both	0.70846	0.999545	1	2	1	1	2869	66	1066	0.602649
uc007gfi.2	Timm13	ENSMUST00000020440	164.166	124	131.914	59	202.768	166	192.842	117	452.232	1546	431.336	1492	516.473	2420	590.444	2215	0.363013	0.305826	0.392601	0.326605	0.363013	0.305826	0.392601	0.326605	1.33616	1.25278	1.0753	0.104745	0.416802	0.041164	both	0.695472	0.999545	-1	2	1	1	1225	226	711	0.512653
uc007gfk.1	Lmnb2	ENSMUST00000057623	17.562	86	15.0784	44	23.9836	127	20.775	82	20.113	430	19.2308	416	21.333	607	23.328	539	0.873167	0.784074	1.12425	0.890561	0.873167	0.784074	1.12425	0.890561	1.37126	1.13515	1.21576	0.281858	0.241923	0.558688	translational_only	0.542236	0.999545	1	2	1	2	3371	84	1496	0.574607
uc007gfl.1	Gadd45b	ENSMUST00000015456	97.1706	127	86.573	67	133.42	189	131.451	138	187.88	1124	173.955	1053	209.623	1732	247.678	1626	0.517195	0.497674	0.636476	0.530733	0.517195	0.497674	0.636476	0.530733	1.44153	1.26384	1.15011	0.201769	0.434215	0.0392576	both	0.998621	0.999801	-1	2	1	1	1266	225	558	0.567141
uc007gfq.1	Slc39a3	ENSMUST00000059551	11.3661	30	14.0764	22	18.5266	53	22.1688	47	15.5775	188	15.5426	190	16.6009	277	21.6476	287	0.729651	0.905665	1.116	1.02408	0.729651	0.905665	1.116	1.02408	1.59951	1.22906	1.30866	0.388095	0.390684	0.204289	translational_only	0.440414	0.999545	1	2	1	2	3483	112	2417	0.556704
uc007gft.1	Sgta	ENSMUST00000005067	62.0566	158	39.1881	60	78.2733	216	64.674	133	82.1857	878	83.0236	892	97.503	1395	120.243	1384	0.755077	0.472012	0.802778	0.537861	0.755077	0.472012	0.802778	0.537861	1.4119	1.318	1.09254	0.127681	0.464559	0.0301683	both	0.979321	0.999713	1	2	1	1	1947	63	936	0.589111
uc007gfv.2	Thop1	ENSMUST00000005057	50.6959	293	38.2783	131	60.1832	377	59.8829	278	73.28	1932	76.846	2054	101.909	3718	113.529	3291	0.691811	0.498117	0.590557	0.527468	0.691811	0.498117	0.590557	0.527468	1.34945	1.43505	0.939575	-0.0899202	0.619867	0.000304772	both	0.431929	0.999545	-1	2	1	1	2585	180	341	0.608511
uc007gfx.2	Map2k2	ENSMUST00000143517	77.8713	254	61.0825	119	88.3233	309	95.0378	249	117.401	1651	115.691	1628	127.448	2432	146.54	2226	0.663292	0.527978	0.693014	0.648545	0.663292	0.527978	0.693014	0.648545	1.31958	1.17545	1.12616	0.171411	0.313986	0.198172	translational_only	0.988043	0.999713	1	2	1	2	2373	200	967	0.585756
uc007gfz.1	Zbtb7a	ENSMUST00000048128	40.4884	193	49.9242	141	44.078	228	38.3014	147	17.5699	382	19.9339	438	14.6128	438	17.1837	409	2.30442	2.50449	3.01639	2.22893	2.30442	2.50449	3.01639	2.22893	0.911149	0.847823	1.09075	0.125322	-0.144796	1	translational_only	0.686673	0.999545	1	2	-1	2	5373	441	3222	0.561139
uc007ggc.3	Pias4	ENSMUST00000005064	20.4749	87	20.2698	51	22.8145	105	28.7324	98	24.6396	477	22.0906	433	25.314	675	29.0078	615	0.830978	0.917577	0.901261	0.990505	0.830978	0.917577	0.901261	0.990505	1.26512	1.16246	1.0819	0.113571	0.309055	0.28896	translational_only	0.903177	0.999545	-1	2	1	2	1668	9	135	0.583333
uc007gge.2	Eef2	ENSMUST00000047864	659.465	1985	397.435	978	1255.28	3414	923.863	2198	738.177	5850	771.674	6208	938.827	9436	969.804	8048	0.893371	0.51503	1.33708	0.952629	0.893371	0.51503	1.33708	0.952629	2.06183	1.26412	1.62575	0.701105	0.338802	0.10323	translational_only	0.130355	0.999545	1	2	1	2	3100	96	427	0.570323
uc007ggy.1	Mrpl54	ENSMUST00000046114	90.4269	99	52.4466	34	83.4308	99	98.9315	87	228.465	1139	209.245	1061	279.868	1932	343.298	1883	0.395802	0.250647	0.298107	0.288179	0.395802	0.250647	0.298107	0.288179	1.27639	1.4237	0.906934	-0.140931	0.606125	0.00183282	both	0.32294	0.999545	-1	2	1	1	587	36	143	0.60477
uc007ggz.2	Apba3	ENSMUST00000057798	21.4803	103	16.9052	48	25.0136	130	29.8576	115	52.9866	1163	50.1752	1113	53.5969	1618	66.0089	1588	0.405392	0.336924	0.466698	0.452327	0.405392	0.336924	0.466698	0.452327	1.42947	1.1594	1.23805	0.308071	0.306862	0.28486	translational_only	0.875987	0.999545	1	2	1	2	2107	264	127	0.616516
uc007ghf.2	Cactin	ENSMUST00000050867	14.7679	94	15.1594	58	22.2963	153	26.4869	135	25.5912	681	22.3319	601	35.9006	1191	29.9339	832	0.577068	0.678823	0.621057	0.884846	0.577068	0.678823	0.621057	0.884846	1.63006	1.37375	1.19907	0.261918	0.444102	0.0418908	both	0.645115	0.999545	1	2	1	1	2724	108	297	0.574523
uc007gho.1	Mfsd12	ENSMUST00000044844	6.0168	24	10.5845	25	5.31999	23	12.1723	39	9.42031	172	10.1222	187	6.62264	167	7.98564	160	0.638705	1.04568	0.803303	1.52427	0.638705	1.04568	0.803303	1.52427	1.05367	0.747514	1.38186	0.46661	-0.327629	0.395547	translational_only	0.393492	0.999545	1	2	-1	2	1702	28	243	0.629847
uc007ght.1	Fzr1	ENSMUST00000140901	52.2609	216	49.4407	121	53.3519	239	50.6041	168	71.6746	1356	73.0789	1397	61.2812	1599	79.0496	1640	0.729141	0.676539	0.870608	0.640156	0.729141	0.676539	0.870608	0.640156	1.02217	0.969447	1.07476	0.104011	0.0512255	1	translational_only	0.867947	0.999545	-1	2	1	2	2254	142	630	0.602484
uc007ghu.2	Dohh	ENSMUST00000072751	56.9241	143	44.3691	66	110.549	301	100.107	202	140.187	1612	143.686	1668	264.731	4190	304.899	3843	0.406058	0.308793	0.417591	0.328329	0.406058	0.308793	0.417591	0.328329	2.07967	2.00664	1.04346	0.0613783	1.10048	1.13191e-11	both	0.623319	0.999545	-1	2	1	1	1444	206	329	0.625346
uc007ghy.1	Nfic	ENSMUST00000105321	145.042	501	134.615	283	119.877	451	136.904	387	52.8037	813	53.7841	840	39.1646	830	46.721	800	2.74682	2.50287	3.06084	2.93025	2.74682	2.50287	3.06084	2.93025	0.918199	0.805773	1.14123	0.190586	-0.209139	0.776802	translational_only	0.484377	0.999545	1	2	-1	2	6295	68	4907	0.55282
uc007gig.1	Ncln	ENSMUST00000020463	125.233	592	107.532	301	166.29	852	179.875	683	142.775	3082	159.096	3477	158.933	4724	190.198	4500	0.877133	0.675896	1.04629	0.945723	0.877133	0.675896	1.04629	0.945723	1.48718	1.15656	1.28266	0.359143	0.304013	0.261172	translational_only	0.457077	0.999545	1	2	1	2	2879	100	1087	0.610976
uc007gil.1	Gna11	ENSMUST00000043604	80.0216	230	62.0752	107	60.4195	191	54.5829	128	58.7297	724	60.1771	738	40.3366	668	48.1192	653	1.36254	1.03154	1.49788	1.13433	1.36254	1.03154	1.49788	1.13433	0.809324	0.743909	1.09946	0.136801	-0.334585	0.217566	translational_only	0.786367	0.999545	1	2	-1	2	3262	119	2063	0.552422
uc007gis.2	Tle2	ENSMUST00000146358	4.18603	27	4.18556	16	5.71922	40	4.24076	22	9.50773	278	11.4095	338	5.79629	235	7.38812	238	0.440276	0.366849	0.986704	0.573996	0.440276	0.366849	0.986704	0.573996	1.18974	0.630313	1.93365	0.951329	-0.567923	0.0200367	both	0.0421115	0.871684	1	1	-1	-1	2994	381	309	0.56847
uc007giu.1	Tle6	ENSMUST00000072020	2.47338	12	0.346871	1	1.13769	6	2.30272	9	5.95467	128	6.268	136	5.23785	154	5.58178	130	0.415368	0.0553399	0.217206	0.412541	0.415368	0.0553399	0.217206	0.412541	1.2199	0.88521	1.33787	0.419943	-0.0947752	1	translational_only	NA	NA	-1	2	-1	2	2015	139	130	0.560298
uc007giy.2	Sirt6	ENSMUST00000042923	11.4955	32	10.9201	18	16.9035	51	10.2863	23	15.2252	194	12.578	162	18.1271	319	20.0965	281	0.755032	0.86819	0.932498	0.511846	0.755032	0.86819	0.932498	0.511846	1.21299	1.37479	0.889801	-0.168446	0.554904	0.0175494	both	0.301355	0.999545	-1	2	1	1	1703	71	627	0.534938
uc007gjs.1	Glt8d2	ENSMUST00000020485	8.53833	25	4.03745	7	5.35687	17	4.67712	11	9.63441	129	8.11154	110	4.80821	89	5.03153	74	0.886233				0.886233	0.497742	1.11411	0.929563	0.797882	0.554478	1.47667	0.562345	-0.75349	0.00314737	both	NA	NA	-1	2	-1	-1	2153	181	916	0.350209
uc007gjt.1	Hcfc2	ENSMUST00000020478	18.4399	112	10.5608	38	14.2724	94	13.5219	66	13.2365	368	13.9349	392	14.2265	546	11.1548	340	1.39312	0.757869	1.00323	1.2122	1.39312	0.757869	1.00323	1.2122	0.958396	0.934116	1.02996	0.0425895	0.00189107	1	translational_only	0.844535	0.999545	-1	2	1	2	2386	137	80	0.485331
uc007gjv.1	Nfyb	ENSMUST00000130911	24.621	42	10.8899	11	17.3075	32	16.7856	23	22.796	178	20.1248	159	25.2223	272	18.0894	155	1.08006	0.541121	0.686198	0.927927	1.08006	0.541121	0.686198	0.927927	0.960075	1.00911	0.99565	-0.00628968	0.117273	1	translational_only	0.628899	0.999545	-1	2	1	2	2552	213	1715	0.366771
uc007gjy.1	Txnrd1	ENSMUST00000020484	90.7522	467	50.5403	154	92.4149	516	85.0117	351	42.5567	998	42.8394	1021	54.1568	1755	53.1003	1368	2.1325	1.17976	1.70643	1.60096	2.1325	1.17976	1.70643	1.60096	1.25574	1.25599	0.998531	-0.00212034	0.424538	0.0260573	both	0.893281	0.999545	-1	2	1	1	3634	113	1679	0.493396
uc007gke.1	Chst11	ENSMUST00000040110	4.76764	14	2.87556	5	10.0544	32	12.7189	30	2.23193	30	1.91357	26	6.30264	117	6.77971	100			1.59526	1.87603	2.13611	1.50272	1.59526	1.87603	2.97955	3.1558	0.953958	-0.068002	1.74958	5.58755e-11	both	NA	NA	-1	2	1	1	5519	368	4092	0.459141
uc007gkf.1	Slc41a2	ENSMUST00000039956	5.40309	26	7.019	20	4.79334	25	3.88301	15	5.85999	129	6.19557	138	4.17478	127	4.80195	116	0.922031	1.13291	1.14817	0.808632	0.922031	1.13291	1.14817	0.808632	0.698461	0.744614	0.952242	-0.0705999	-0.332396	0.423713	translational_only	NA	NA	-1	2	-1	2	4386	238	2426	0.435705
uc007gkg.2	D10Wsu102e	ENSMUST00000020488	33.5714	51	31.1267	28	28.5447	47	29.5022	36	16.5379	115	12.8153	90	17.4541	167	13.236	101	2.02997		1.63542	2.22894	2.02997	2.42887	1.63542	2.22894	0.897197	1.04554	0.866674	-0.206439	0.167421	1	translational_only	NA	NA	-1	2	1	2	3509	38	2913	0.296951
uc007gkh.2	Aldh1l2	ENSMUST00000020497	21.2092	165	18.228	84	12.448	105	13.2774	83	7.48061	266	7.13785	257	7.91817	389	6.49758	254	2.83522	2.55371	1.57209	2.04344	2.83522	2.55371	1.57209	2.04344	0.652315	0.986134	0.670917	-0.575793	0.0820751	1	translational_only	0.00652599	0.475683	-1	-1	1	2	6030	126	3132	0.440464
uc007gkj.1	A230046K03Rik	ENSMUST00000038388	13.8365	137	9.54872	56	19.941	214	16.8486	134	6.22032	282	5.77703	265	7.5929	475	7.94441	395	2.2244	1.65288	2.62627	2.12081	2.2244	1.65288	2.62627	2.12081	1.5732	1.29506	1.22433	0.291997	0.468552	0.0288907	both	0.285074	0.999545	1	2	1	1	5858	101	2235	0.383749
uc007gkk.1	Appl2	ENSMUST00000020500	3.59234	20	1.51668	5	2.48581	15	3.57784	16	3.33541	85	3.83938	99	3.60838	127	4.39834	123			0.6889	0.813453	1.07703	0.395033	0.6889	0.813453	1.18685	1.11595	1.02058	0.0293831	0.248635	0.883563	translational_only	NA	NA	-1	2	1	2	2945	83	873	0.480136
uc007gko.1	Nuak1	ENSMUST00000020220	19.7085	109	17.0998	56	21.5201	129	24.5236	109	11.8625	300	12.0817	309	11.4412	399	11.087	308	1.66141	1.41534	1.88093	2.21193	1.66141	1.41534	1.88093	2.21193	1.25091	0.940862	1.33025	0.4117	0.0102983	1	translational_only	0.206023	0.999545	1	2	1	2	5018	114	2927	0.529693
uc007gkq.1	Ckap4	ENSMUST00000053871	310.414	1499	307.051	878	282.768	1480	281.009	1090	200.348	4413	216.873	4842	150.105	4569	163.86	3963	1.54937	1.41581	1.8838	1.71493	1.54937	1.41581	1.8838	1.71493	0.91305	0.752515	1.21366	0.279368	-0.313021	0.170855	translational_only	0.431728	0.999545	1	2	-1	2	2915	22	1165	0.492624
uc007gks.1	Tcp11l2	ENSMUST00000020223	1.6141	7	1.55764	4	4.89314	23	4.30602	15	2.87137	57	2.53909	51	5.36178	147	6.15136	134			0.912597	0.70001	0.562135	0.613463	0.912597	0.70001	2.90035	2.12794	1.37173	0.456	1.18082	1.10287e-06	both	NA	NA	-1	2	1	1	2400	217	629	0.425833
uc007gku.1	Polr3b	ENSMUST00000077175	10.0369	96	7.76885	44	14.3771	149	8.98112	69	5.64501	247	4.58385	203	9.49325	573	6.64372	319	1.77801	1.69483	1.51446	1.35182	1.77801	1.69483	1.51446	1.35182	1.31184	1.57759	0.82534	-0.276939	0.757038	0.00311149	both	0.192545	0.999545	-1	2	1	1	4830	30	1398	0.423188
uc007glb.2	Tmem263	ENSMUST00000095383	65.941	61	52.9419	29	37.8999	38	34.9907	26	33.2987	141	35.2436	151	22.9135	134	25.3947	118	1.98029	1.50217	1.65404	1.37787	1.98029	1.50217	1.65404	1.37787	0.613129	0.704794	0.870625	-0.199876	-0.41057	0.173604	translational_only	NA	NA	-1	2	-1	2	3778	377	3053	0.322128
uc007gle.1	Cry1	ENSMUST00000020227	9.82454	50	4.98302	15	8.39059	46	8.8211	36	9.15127	212	8.0586	189	11.5622	366	10.0195	254	1.07357	0.618348	0.725689	0.88039	1.07357	0.618348	0.725689	0.88039	1.16236	1.25403	0.949265	-0.0751171	0.416047	0.115767	translational_only	0.494205	0.999545	-1	2	1	2	3016	583	612	0.51492
uc007glg.2	Btbd11	ENSMUST00000105307	5.12764	48	3.42773	19	6.60359	67	8.91324	67	2.84807	122	3.73766	162	4.29601	254	4.61779	217	1.80039	0.917077	1.53715	1.9302	1.80039	0.917077	1.53715	1.9302	1.8137	1.3535	1.27595	0.351566	0.531991	0.038426	both	NA	NA	-1	2	1	1	5788	515	1943	0.53179
uc007gnd.2	Pwp1	ENSMUST00000001836	28.7864	118	22.8348	56	48.8864	213	42.6665	140	30.2009	526	32.879	582	57.3518	1238	46.5891	856	0.953164	0.694509	0.852394	0.915806	0.953164	0.694509	0.852394	0.915806	1.77356	1.64777	1.07315	0.101852	0.705189	0.000115508	both	0.860743	0.999545	1	2	1	1	2579	112	961	0.421481
uc007gni.1	Rtcb	ENSMUST00000001834	100.591	426	72.1782	181	116.556	535	89.9552	306	69.4299	1345	66.8329	1310	153.421	4091	79.9827	1698	1.44882	1.07998	0.759711	1.12468	1.44882	1.07998	0.759711	1.12468	1.1953	1.7129	0.745173	-0.424352	0.871225	0.0042236	both	0.0462635	0.914835	-1	-1	1	1	1979	86	375	0.509853
uc007gnk.1	Fbxo7	ENSMUST00000130320	11.1675	49	4.61869	12	15.5604	74	13.9031	49	14.1404	284	14.4274	293	23.3764	648	20.8396	459	0.78976	0.320134	0.665648	0.667146	0.78976	0.320134	0.665648	0.667146	1.86641	1.54776	1.20083	0.264033	0.72874	0.000100368	both	0.742103	0.999545	1	2	1	1	1886	94	220	0.515907
uc007gnr.1	Timp3	ENSMUST00000020234	675.936	1176	533.769	549	1002.28	1890	893.03	1248	212.115	1681	220.652	1778	231.325	2536	287.902	2516	3.18664	2.41906	4.33278	3.10186	3.18664	2.41906	4.33278	3.10186	1.56675	1.19978	1.32626	0.407367	0.361057	0.137374	translational_only	0.0592717	0.929969	1	2	1	2	4681	442	3603	0.454604
uc007gqi.1	Hsp90b1	ENSMUST00000020238	567.938	3803	390.76	1552	902.174	6520	759.538	4087	181.371	5430	182.808	5600	570.525	22886	360.029	11690	3.13136	2.13755	1.58131	2.10966	3.13136	2.13755	1.58131	2.10966	1.7333	2.55521	0.700518	-0.513506	1.4102	9.74401e-11	both	0.0184312	0.629534	-1	-1	1	1	2759	89	261	0.399058
uc007gqn.1	Nt5dc3	ENSMUST00000099396	18.9836	87	12.1604	33	26.9769	134	20.1022	74	6.26017	131	7.3723	156	7.55054	217	7.69778	176	3.03244	1.64947	3.57285	2.61143	3.03244	1.64947	3.57285	2.61143	1.51166	1.11853	1.32089	0.401507	0.251957	0.69982	translational_only	NA	NA	-1	2	1	2	5952	105	4206	0.43834
uc007grd.1	Parpbp	ENSMUST00000048518	15.8122	76	8.07185	23	10.564	55	11.6422	45	9.83521	216	8.20475	182	7.26178	220	8.35503	201	1.60772	0.983802	1.45474	1.39344	1.60772	0.983802	1.45474	1.39344	0.929747	0.865679	1.09904	0.136238	-0.115152	1	translational_only	0.830519	0.999545	1	2	-1	2	3628	449	1457	0.429438
uc007grf.2	Nup37	ENSMUST00000169309	37.558	102	25.4954	41	49.94	147	33.9224	74	78.0299	969	78.3118	984	90.8704	1552	100.175	1358	0.481328	0.325563	0.549574	0.338631	0.481328	0.325563	0.549574	0.338631	1.33002	1.22197	1.10077	0.138519	0.379335	0.068754	translational_only	0.816096	0.999545	-1	2	1	2	1290	161	148	0.434884
uc007grh.2	Ccdc53	ENSMUST00000020248	26.0665	41	20.3633	19	16.9195	29	10.216	13	60.4951	405	59.6541	408	46.0737	426	59.6734	435	0.430885	0.341356	0.367228	0.171199	0.430885	0.341356	0.367228	0.171199	0.584443	0.880131	0.697226	-0.520302	-0.103344	1	translational_only	0.0668027	0.929969	-1	2	-1	2	1048	145	318	0.46374
uc007grl.1	Gnptab	ENSMUST00000020251	4.98679	52	3.56204	22	6.8996	78	7.87766	66	4.06445	194	4.43108	214	5.91942	390	5.85968	307	1.22693	0.803877	1.16559	1.34438	1.22693	0.803877	1.16559	1.34438	1.72857	1.38651	1.23595	0.305619	0.568949	0.00598251	both	0.537511	0.999545	1	2	1	1	5204	7	1489	0.455995
uc007grx.2	Utp20	ENSMUST00000004470	7.49487	177	6.50663	91	18.7135	479	16.9726	322	4.15355	449	4.48846	491	12.9887	1938	10.2835	1219	1.80445	1.44963	1.44075	1.65046	1.80445	1.44963	1.44075	1.65046	2.54873	2.69292	0.949951	-0.0740757	1.52692	2.25073e-17	both	0.542073	0.999545	-1	2	1	1	8831	164	297	0.457366
uc007gsd.1	Gas2l3	ENSMUST00000105298	7.83206	45	6.76032	23	6.58379	41	7.1504	33	5.21171	137	5.18585	138	5.01067	182	5.85579	169	1.50278	1.30361	1.31396	1.22108	1.50278	1.30361	1.31396	1.22108	0.94119	1.0451	0.90331	-0.146707	0.156763	1	translational_only	NA	NA	-1	2	1	2	6745	313	4380	0.345441
uc007gsm.1	Scyl2	ENSMUST00000174252	16.1951	127	12.4906	58	17.2952	147	16.352	103	7.46886	268	7.02351	255	9.32265	462	9.87564	389	2.16835	1.7784	1.85518	1.65579	2.16835	1.7784	1.85518	1.65579	1.17296	1.32472	0.889586	-0.168794	0.502292	0.0160123	both	0.375193	0.999545	-1	2	1	1	3431	276	362	0.454678
uc007gss.1	Actr6	ENSMUST00000020109	5.74038	19	4.08182	8	8.64128	31	5.26585	14	11.1547	169	9.71966	149	11.7667	246	15.9529	265	0.514617	0.419955	0.734385	0.330087	0.514617	0.419955	0.734385	0.330087	1.41589	1.32793	1.13899	0.18776	0.499462	0.0873414	translational_only	NA	NA	-1	2	1	2	1703	54	458	0.381092
uc007gsv.2	Uhrf1bp1l	ENSMUST00000020112	17.2155	212	15.5003	113	16.2582	217	17.2876	171	13.839	779	13.2406	755	12.6614	985	12.7584	789	1.24399	1.17066	1.28408	1.35499	1.24399	1.17066	1.28408	1.35499	1.02537	0.938706	1.09294	0.128219	0.00664848	1	translational_only	0.958697	0.999545	1	2	1	2	6446	254	1818	0.440118
uc007gth.1	Apaf1	ENSMUST00000020157	10.143	107	5.12279	32	8.83347	101	7.31688	62	4.7217	228	4.66652	228	4.37849	292	4.32167	229	2.14816	1.09778	2.01747	1.69307	2.14816	1.09778	2.01747	1.69307	1.05795	0.92671	1.14313	0.192994	-0.0118194	1	translational_only	0.510801	0.999545	1	2	-1	2	6514	625	2139	0.437826
uc007gtl.1	Ikbip	ENSMUST00000020149	37.564	117	26.0258	48	39.9897	135	42.3687	106	27.9667	398	30.1126	434	34.7818	683	29.8767	467	1.34317	0.864282	1.14973	1.41812	1.34317	0.864282	1.14973	1.41812	1.29515	1.11328	1.16326	0.218179	0.253708	0.540642	translational_only	0.714057	0.999545	1	2	1	2	3251	88	2041	0.306367
uc007gtn.1	Slc25a3	ENSMUST00000076694	411.825	953	227.573	345	540.861	1267	417.936	774	611.959	4612	613.015	4779	792.139	7650	822.238	6543	0.672962	0.371235	0.682785	0.508291	0.672962	0.371235	0.682785	0.508291	1.49953	1.31789	1.14066	0.189871	0.398594	0.035574	both	0.85116	0.999545	1	2	1	1	1512	52	386	0.472222
uc007gud.2	Nedd1	ENSMUST00000020163	10.364	56	3.70211	12	7.21698	42	5.5153	24	4.82654	108	5.17807	119	6.20907	182	5.65755	139	2.1473	0.71496	1.16233	0.974856	2.1473	0.71496	1.16233	0.974856	0.905173	1.18611	0.746678	-0.421441	0.29485	0.53587	translational_only	NA	NA	-1	2	1	2	3533	104	1446	0.410699
uc007gul.2	Cdk17	ENSMUST00000069965	14.3675	63	6.54737	17	19.1351	91	20.1843	71	11.541	230	12.3068	248	19.9751	548	18.3702	402	1.24491	0.532011	0.95795	1.09875	1.24491	0.532011	0.95795	1.09875	1.87997	1.60791	1.15745	0.210956	0.782396	2.90526e-05	both	0.698223	0.999545	1	2	1	1	3643	354	1717	0.44359
uc007gur.1	Lta4h	ENSMUST00000016033	49.9514	248	30.4506	91	44.388	236	38.0834	153	42.9905	869	45.725	937	44.7849	1199	49.9862	1069	1.16192	0.665951	0.991137	0.761879	1.16192	0.665951	0.991137	0.761879	1.02574	1.06826	0.95905	-0.0603226	0.13441	1	translational_only	0.727062	0.999545	-1	2	1	2	2066	114	116	0.490803
uc007guw.2	Snrpf	ENSMUST00000020203	17.9305	7	0	0	5.01752	2	0	0	112.977	79	81.9757	58	160.9	141	139.339	99			0.031184		0.158709	0	0.031184	0	0.279832	1.54007	0.196485	-2.34751	0.59756	0.0576231	translational_only	NA	NA	-1	2	1	2	813	117	435	0.403444
uc007gux.2	Ntn4	ENSMUST00000020204	10.0401	53	10.5573	33	6.64162	38	3.77342	16	6.4147	155	6.38063	156	2.42721	81	2.52681	67	1.56517	1.65458			1.56517	1.65458	2.73632	1.49335	0.505649	0.387174	1.31367	0.393598	-1.27171	3.537e-09	both	NA	NA	-1	2	-1	-1	2411	405	119	0.559934
uc007gve.1	Metap2	ENSMUST00000047910	23.5865	76	10.8539	23	28.8216	95	22.9834	61	11.6514	129	12.9554	147	38.1813	366	19.5747	205	2.02434	0.837793	0.754861	1.17414	2.02434	0.837793	0.754861	1.17414	1.50419	2.34715	0.673972	-0.56924	0.822988	0.00116131	both	NA	NA	-1	2	1	1	4996	699	2860	0.416733
uc007gvo.2	Nr2c1	ENSMUST00000105290	6.05631	30	4.08881	12	5.21226	28	5.78054	23	6.13034	139	6.40374	147	6.14177	192	6.07222	151	0.987924	0.638502	0.848658	0.951964	0.987924	0.638502	0.848658	0.951964	1.08356	0.974462	1.1071	0.146789	0.0586243	1	translational_only	NA	NA	-1	2	1	2	3827	191	1863	0.418082
uc007gvq.1	Ndufa12	ENSMUST00000179990	199.103	187	124.558	82	238.535	226	135.023	108	130.946	273	98.5089	222	165.764	418	257.351	501	1.52049	1.26443	1.439	0.524665	1.52049	1.26443	1.439	0.524665	1.15417	1.844	0.705106	-0.504088	0.717672	0.00865272	both	0.0344392	0.815993	-1	-1	1	1	561	24	87	0.511586
uc007gvx.1	Cep83	ENSMUST00000020212	7.90491	46	6.9617	24	12.9948	82	10.697	50	7.17757	191	6.1682	166	12.7106	466	8.93794	261	1.10133	1.12864	1.02236	1.19681	1.10133	1.12864	1.02236	1.19681	1.59363	1.62213	0.995154	-0.00700887	0.797585	0.00143084	both	0.626895	0.999545	-1	2	1	1	2986	379	528	0.430007
uc007gwp.2	Nudt4	ENSMUST00000020217	22.9444	32	18.6552	16	35.2044	53	21.5547	24	33.9211	188	26.7128	154	37.6944	271	42.1895	244	0.676404	0.698362	0.933941	0.510902	0.676404	0.698362	0.933941	0.510902	1.36441	1.31748	1.05097	0.0717264	0.393539	0.19384	translational_only	0.919456	0.999545	-1	2	1	2	3231	410	2281	0.450325
uc007gwv.1	Eea1	ENSMUST00000053484	15.9342	190	12.4633	88	20.9688	271	20.777	199	5.81064	317	5.75812	318	9.12016	687	7.07078	423	2.74224	2.16448	2.29917	2.93843	2.74224	2.16448	2.29917	2.93843	1.47005	1.39954	1.06743	0.0941461	0.584312	0.00889747	both	0.864799	0.999545	1	2	1	1	7836	286	3314	0.410031
uc007gww.2	Btg1	ENSMUST00000038377	25.534	32	11.1006	9	41.7154	55	47.0389	45	41.5825	161	38.534	155	76.1567	301	81.3693	259	0.614057	0.288073	0.547757	0.578091	0.614057	0.288073	0.547757	0.578091	2.42269	1.96621	1.24799	0.319606	0.626333	0.00317612	both	0.121182	0.999545	1	2	1	1	5008	324	4168	0.383586
uc007gxf.2	Atp2b1	ENSMUST00000020107	20.1012	205	13.6873	83	24.4672	270	24.6588	202	8.45462	388	8.23357	382	17.6585	1081	12.5724	626	2.37754	1.66238	1.38558	1.96134	2.37754	1.66238	1.38558	1.96134	1.45393	1.81151	0.828462	-0.271492	0.92143	1.10404e-05	both	0.187001	0.999545	-1	2	1	1	7130	443	3024	0.415147
uc007gxh.1	Poc1b	ENSMUST00000020113	4.5126	18	6.3507	15	6.70782	29	9.05761	29	5.8262	106	5.27297	97	6.49164	163	5.76421	115			1.0333	1.57135	0.774535	1.20439	1.0333	1.57135	1.45126	1.10421	1.3162	0.396377	0.244172	0.913846	translational_only	NA	NA	-1	2	1	2	2727	38	1258	0.47158
uc007gxj.2	Galnt4	ENSMUST00000161240	4.32589	21	6.95764	20	6.65201	35	8.46298	33	3.78685	84	3.55814	80	5.05066	155	4.71617	115			1.31706	1.79446	1.14235	1.95541	1.31706	1.79446	1.33956	1.32973	1.00444	0.00639374	0.512174	0.0696081	translational_only	NA	NA	-1	2	1	2	5113	280	3096	0.437903
uc007gxk.2	Dusp6	ENSMUST00000020118	18.2242	58	11.1533	21	35.7532	123	37.2945	95	15.0159	217	17.256	253	17.3792	345	23.2671	366	1.21366	0.64634	2.05724	1.60288	1.21366	0.64634	2.05724	1.60288	2.48652	1.25949	1.96781	0.976589	0.414261	0.164927	translational_only	0.00112282	0.256785	1	1	1	2	2797	461	1190	0.489811
uc007gxo.1	Csl	ENSMUST00000056085	29.2736	93	18.1768	38	46.0431	144	44.2084	110	29.6371	317	37.7756	392	52.3574	618	52.5846	538	0.987737	0.481179	0.879399	0.840711	0.987737	0.481179	0.879399	0.840711	1.90202	1.55671	1.17101	0.227749	0.509644	0.018366	both	0.391319	0.999545	1	2	1	1	1954	457	96	0.508188
uc007gxt.2	Tmtc3	ENSMUST00000058154	4.90386	36	4.23064	19	6.10455	47	5.44352	32	1.15442	38	1.38004	46	2.39463	97	2.60194	86			2.54927		4.2479	3.0656	2.54927	2.0921	1.26423	1.97145	0.634631	-0.65601	0.923037	0.00119803	both	NA	NA	-1	2	1	1	5990	200	3027	0.36611
uc007gxx.2	4930430F08Rik	ENSMUST00000054471	10.2779	28	4.33932	7	6.77339	20	8.2257	18	5.53898	69	6.75066	85	7.21493	124	8.95262	122			0.938801	0.918804	1.85556	0.642799	0.938801	0.918804	1.02612	1.31554	0.74353	-0.427537	0.483	0.147867	translational_only	NA	NA	-1	2	1	2	2419	143	1292	0.374122
uc007gyo.2	Mettl25	ENSMUST00000046638	2.57875	13	2.00999	6	2.56226	14	1.97564	8	6.41372	148	6.12462	143	6.77766	216	6.39759	162	0.402068	0.328181	0.378044	0.308811	0.402068	0.328181	0.378044	0.308811	0.988922	1.0508	0.940577	-0.0883826	0.170808	1	translational_only	NA	NA	-1	2	1	2	2039	61	175	0.467876
uc007gyp.1	Ccdc59	ENSMUST00000020049	36.8636	73	21.2595	25	33.9147	73	42.6283	68	44.349	402	45.6843	419	77.2055	961	65.1382	647	0.831216	0.465356	0.439278	0.654429	0.831216	0.465356	0.439278	0.654429	1.31691	1.58101	0.843537	-0.245476	0.754553	4.90823e-05	both	0.191445	0.999545	-1	2	1	1	1078	23	332	0.449907
uc007gzb.1	Ptprq	ENSMUST00000050702	2.31138	45	1.47463	17	1.8956	40	1.91837	30	2.36768	211	2.16257	195	1.788	220	2.11703	207	0.976219	0.681888	1.06018	0.906162	0.976219	0.681888	1.06018	0.906162	1.00739	0.86199	1.1859	0.245977	-0.121361	1	translational_only	0.717485	0.999545	1	2	-1	2	7058	155	0	0.433267
uc007gzc.1	Ppp1r12a	ENSMUST00000070663	42.9757	364	38.2952	192	44.6915	410	42.9341	292	13.9634	541	12.8054	502	18.015	963	16.3993	697	3.07773	2.99055	2.48079	2.61805	3.07773	2.99055	2.48079	2.61805	1.07819	1.28561	0.840244	-0.25112	0.459653	0.02539	both	0.189975	0.999545	-1	2	1	1	3403	0	388	0.464296
uc007gzf.1	Pawr	ENSMUST00000095313	33.511	93	23.7326	39	27.9262	84	29.1589	65	18.8719	239	18.2831	235	20.3382	355	18.6705	260	1.77571	1.29806	1.37309	1.56176	1.77571	1.29806	1.37309	1.56176	0.997232	1.04989	0.954806	-0.066721	0.167266	1	translational_only	0.572836	0.999545	-1	2	1	2	1828	189	637	0.508753
uc007gzp.1	E2f7	ENSMUST00000073781	21.4115	163	17.0688	77	21.5889	178	20.0925	123	10.0478	350	10.5341	371	9.40599	452	9.57497	366	2.13096	1.62035	2.29523	2.09844	2.13096	1.62035	2.29523	2.09844	1.08319	0.922218	1.17124	0.228033	-0.0196611	1	translational_only	0.473727	0.999545	1	2	-1	2	5476	215	2546	0.498356
uc007gzs.2	Csrp2	ENSMUST00000020403	78.1326	124	56.3978	53	57.5539	99	47.9367	61	133.884	957	140.797	1022	96.7191	960	112.75	886	0.583584	0.400563	0.595062	0.425159	0.583584	0.400563	0.595062	0.425159	0.78414	0.762592	1.03666	0.0519365	-0.292153	0.30127	translational_only	0.708557	0.999545	-1	2	-1	2	889	80	227	0.537683
uc007gzy.1	Osbpl8	ENSMUST00000105275	9.87468	74	7.21136	32	9.60318	78	9.46933	57	4.92861	169	3.86077	134	5.00454	237	4.96973	187	2.00354	1.86786	1.91889	1.9054	2.00354	1.86786	1.91889	1.9054	1.11626	1.13481	0.987833	-0.0176609	0.279572	0.629558	translational_only	NA	NA	-1	2	1	2	7152	459	4023	0.380034
uc007hac.2	Nap1l1	ENSMUST00000065917	51.3653	110	28.5451	46	63.3146	139	43.2073	81	40.0531	278	32.5986	252	78.4726	494	53.355	348	1.28243	0.875655	0.806837	0.809808	1.28243	0.875655	0.806837	0.809808	1.33302	1.81452	0.749111	-0.416749	0.455734	0.0504046	translational_only	0.61141	0.999545	-1	2	1	2	1519	180	163	0.42923
uc007haf.2	Phlda1	ENSMUST00000164773	109.599	364	82.7577	164	155.931	557	179.43	475	115.092	1623	107.932	1557	129.914	2493	171.307	2629	0.95227	0.766755	1.20026	1.04741	0.95227	0.766755	1.20026	1.04741	1.74343	1.35062	1.30753	0.386843	0.506349	0.0227827	both	0.339053	0.999545	1	2	1	1	1953	119	616	0.486431
uc007hai.2	Krr1	ENSMUST00000163048	26.303	82	10.6696	20	33.7691	114	25.9102	65	6.34144	90	5.44174	79	19.9246	377	14.2175	219	4.1478		1.69485	1.82241	4.1478	1.9607	1.69485	1.82241	1.61415	2.89753	0.575798	-0.796366	1.59255	1.27726e-11	both	NA	NA	-1	2	1	1	4990	98	3749	0.381764
uc007haj.2	Glipr1	ENSMUST00000074805	17.0355	36	7.19236	9	3.49278	8	1.76737	3	25.0179	242	23.7356	232	9.96889	133	15.2617	162	0.680933	0.30302	0.350368	0.115804	0.680933	0.30302	0.350368	0.115804	0.217112	0.517514	0.473775	-1.07773	-0.862633	0.000719255	both	NA	NA	-1	2	-1	-1	1081	233	80	0.413506
uc007hax.2	Tbc1d15	ENSMUST00000020339	30.4017	169	17.7436	59	41.8297	251	29.0257	130	17.1434	432	18.0348	457	27.5983	921	23.9218	653	1.77337	0.983853	1.51566	1.21336	1.77337	0.983853	1.51566	1.21336	1.4717	1.46455	0.98977	-0.0148345	0.612861	0.00101878	both	0.907254	0.999545	-1	2	1	1	3779	82	1681	0.398783
uc007haz.1	Rab21	ENSMUST00000020343	90.5537	166	77.3844	84	81.1566	161	84.2118	124	63.8359	534	63.7196	541	63.7802	738	66.681	614	1.41854	1.21445	1.27244	1.26291	1.41854	1.21445	1.27244	1.26291	0.984698	1.02278	0.962915	-0.0545201	0.130662	1	translational_only	0.568167	0.999545	-1	2	1	2	1824	245	910	0.410088
uc007hbd.1	Tmem19	ENSMUST00000092170	10.7226	30	9.65769	16	19.806	60	12.4718	28	13.6556	174	12.0345	155	15.2497	267	15.8839	223	0.785214	0.802498	1.29878	0.785183	0.785214	0.802498	1.29878	0.785183	1.58378	1.21189	1.31255	0.392377	0.373409	0.19747	translational_only	0.462246	0.999545	1	2	1	2	3009	232	1766	0.462944
uc007hbg.1	Zfc3h1	ENSMUST00000036044	6.22963	105	5.81135	58	5.91188	108	6.50102	88	3.55324	274	3.75334	293	4.44133	473	3.79216	321	1.75322	1.54831	1.3311	1.71433	1.75322	1.54831	1.3311	1.71433	1.03089	1.12686	0.92243	-0.116488	0.272497	0.498644	translational_only	0.401635	0.999545	-1	2	1	2	6956	239	738	0.440627
uc007hcb.2	Cnot2	ENSMUST00000105267	29.2406	135	14.6315	40	39.3684	197	29.1226	108	18.5491	392	17.6308	377	29.7395	868	29.1929	677	1.57639	0.829884	1.32378	0.997592	1.57639	0.829884	1.32378	0.997592	1.56115	1.62887	0.964713	-0.051828	0.801389	3.87164e-06	both	0.68877	0.999545	-1	2	1	1	2746	54	1039	0.436999
uc007hcj.1	Rab3ip	ENSMUST00000020375	17.0321	61	13.203	28	19.5786	76	15.2949	44	24.8462	407	25.8627	429	33.8239	764	22.0856	397	0.685503	0.510504	0.57884	0.692527	0.685503	0.510504	0.57884	0.692527	1.15341	1.10256	1.06301	0.0881536	0.240091	0.934214	translational_only	0.739675	0.999545	-1	2	1	2	2690	151	1252	0.451301
uc007hcs.1	Cct2	ENSMUST00000047672	296.437	1325	177.996	472	532.382	2571	412.535	1483	279.617	5634	287.526	5892	664.077	18159	563.216	12341	1.06015	0.619061	0.801688	0.732464	1.06015	0.619061	0.801688	0.732464	1.99168	2.16399	0.913613	-0.130345	1.18823	1.58942e-13	both	0.477352	0.999545	-1	2	1	1	1962	106	248	0.471458
uc007hct.1	Frs2	ENSMUST00000020381	26.0538	111	21.4051	54	30.5349	141	23.9616	82	11.5888	226	9.73032	192	10.693	288	12.8971	276	2.24818	2.19984	2.85558	1.8579	2.24818	2.19984	2.85558	1.8579	1.14829	1.10653	1.05968	0.0836294	0.239576	0.792122	translational_only	0.86567	0.999545	1	2	1	2	5684	355	3802	0.443878
uc007hcx.2	Yeats4	ENSMUST00000020382	29.3239	55	15.3068	17	24.6328	50	25.2611	38	48.2801	412	54.1003	465	66.824	778	59.0922	550	0.607372	0.282934	0.368622	0.427486	0.607372	0.282934	0.368622	0.427486	1.11793	1.22989	0.894197	-0.161336	0.387706	0.0972798	translational_only	0.35738	0.999545	-1	2	1	2	1408	198	526	0.502131
uc007hdo.1	Nup107	ENSMUST00000064848	35.6048	278	29.1994	135	52.9384	448	43.3697	272	18.4668	660	19.1082	691	43.3504	2139	28.6848	1125	1.92805	1.52811	1.22118	1.51194	1.92805	1.52811	1.22118	1.51194	1.48614	1.91711	0.790795	-0.338624	1.03776	3.20306e-06	both	0.0943676	0.961965	-1	2	1	1	3092	94	217	0.476714
uc007hdr.1	Rap1b	ENSMUST00000064667	150.148	223	72.8007	65	115.767	186	109.6	131	75.5051	483	77.0978	497	80.0294	687	71.223	503	1.98858	0.944264	1.44655	1.53883	1.98858	0.944264	1.44655	1.53883	1.01085	0.99115	1.01792	0.0256186	0.0712635	1	translational_only	0.994302	0.999801	1	2	1	2	1937	168	1214	0.392876
uc007hea.1	Dyrk2	ENSMUST00000004281	18.8765	95	20.8049	62	14.2995	78	16.3266	66	12.0378	277	12.8778	300	9.50819	302	9.50457	240	1.5681	1.61557	1.50391	1.71776	1.5681	1.61557	1.50391	1.71776	0.7718	0.763087	1.01194	0.0171221	-0.292987	0.36902	translational_only	0.763926	0.999545	-1	2	-1	2	2137	134	203	0.518484
uc007hec.2	Cand1	ENSMUST00000020315	81.6035	847	50.2622	309	106.875	1202	86.0729	718	56.3702	2676	58.8551	2827	80.3731	5258	74.8882	3898	1.44764	0.854	1.32974	1.14935	1.44764	0.854	1.32974	1.14935	1.46322	1.34746	1.0771	0.107152	0.525968	0.00246068	both	0.895899	0.999545	1	2	1	1	8209	347	4169	0.434889
uc007hes.2	Helb	ENSMUST00000020449	4.19241	38	4.84429	26	7.43307	73	5.90981	43	3.76118	156	4.57361	192	5.06262	290	4.45874	203	1.11466	1.05918	1.46823	1.32544	1.11466	1.05918	1.46823	1.32544	1.47652	1.14236	1.28513	0.361918	0.292655	0.507792	translational_only	0.391194	0.999545	1	2	1	2	4532	103	1204	0.434466
uc007hey.1	Tmbim4	ENSMUST00000020446	36.0597	71	24.0159	28	76.8488	164	71.4489	113	82.2392	738	86.7697	789	138.73	1702	162.143	1599	0.438473	0.276777	0.553946	0.440654	0.438473	0.276777	0.553946	0.440654	2.46852	1.78022	1.39056	0.475669	0.922147	9.60042e-08	both	0.520864	0.999545	1	2	1	1	808	20	71	0.482673
uc007hfh.2	Msrb3	ENSMUST00000092143	199.655	305	128.237	116	132.871	220	106.759	131	87.2352	610	80.5702	569	55.5008	535	42.8246	328	2.28869	1.59162	2.39404	2.49293	2.28869	1.59162	2.39404	2.49293	0.730821	0.585949	1.25943	0.332769	-0.671442	0.00141245	both	0.240555	0.999545	1	2	-1	-1	3708	180	2967	0.435275
uc007hfi.1	Lemd3	ENSMUST00000119944	10.7313	83	11.1277	51	21.0027	176	20.2814	126	5.037	178	5.76756	206	9.30903	454	7.92249	307	2.13049	1.92935	2.25616	2.55998	2.13049	1.92935	2.25616	2.55998	1.88866	1.59484	1.18629	0.246453	0.773417	0.000187063	both	0.418458	0.999545	1	2	1	1	4743	4	1982	0.43833
uc007hfo.1	Gns	ENSMUST00000040344	79.9397	365	80.6311	218	68.0971	337	61.6214	226	39.3788	822	44.9232	950	28.9279	835	34.4455	790	2.03002	1.79486	2.35403	1.78895	2.03002	1.79486	2.35403	1.78895	0.807859	0.751742	1.08317	0.115255	-0.31431	0.273869	translational_only	0.822005	0.999545	1	2	-1	2	3855	101	2119	0.518807
uc007hft.3	Tbk1	ENSMUST00000020316	17.9269	110	12.11	44	20.2991	135	19.2748	95	8.47371	238	7.7413	220	17.314	671	10.6794	329	2.1156	1.56433	1.17241	1.80487	2.1156	1.56433	1.17241	1.80487	1.31751	1.72639	0.809058	-0.305685	0.887647	0.00100543	both	0.110484	0.999545	-1	2	1	1	3030	159	681	0.449835
uc007hfv.1	Xpot	ENSMUST00000039810	7.73464	57	8.09668	37	9.26746	73	9.19903	56	9.466	253	10.9656	301	11.195	377	9.35561	272	0.817097	0.738369	0.82782	0.983263	0.817097	0.738369	0.82782	0.983263	1.16645	1.00582	1.16433	0.219506	0.0200199	1	translational_only	0.635469	0.999545	1	2	1	2	5989	286	2814	0.41476
uc007hfx.1	BC048403	ENSMUST00000065600	4.83125	18	5.43932	12	8.41968	34	8.01959	24	3.58228	61	4.28841	74	3.99095	94	4.96942	93			2.10969		1.34865	1.26838	2.10969	1.61379	1.60062	1.13845	1.42279	0.508722	0.276364	0.880189	translational_only	NA	NA	-1	2	1	2	3117	39	1740	0.465833
uc007hgd.1	Tmem5	ENSMUST00000140299	22.0929	82	25.4608	56	30.8006	124	27.8189	83	74.4666	1242	69.913	1189	71.4916	1634	86.2801	1573	0.296682	0.364179	0.430828	0.322425	0.296682	0.364179	0.430828	0.322425	1.2327	1.09276	1.13981	0.188788	0.210747	0.742097	translational_only	0.898993	0.999545	-1	2	1	2	1378	31	12	0.460813
uc007hgj.2	Mon2	ENSMUST00000073792	20.558	298	16.194	139	22.3409	351	22.1583	258	17.5428	1164	17.6988	1188	18.4531	1691	18.9805	1382	1.17187	0.914981	1.21069	1.16743	1.17187	0.914981	1.21069	1.16743	1.2108	1.0622	1.13957	0.188487	0.184619	0.8028	translational_only	0.793138	0.999545	1	2	1	2	9297	543	3609	0.466817
uc007hhd.2	Lrig3	ENSMUST00000074807	10.7149	101	7.70394	43	20.7445	212	17.1646	130	9.38655	405	10.1763	444	18.3134	1089	20.1248	952	1.14152	0.757048	1.13275	0.852909	1.14152	0.757048	1.13275	0.852909	2.05817	1.96486	1.04587	0.0647032	1.06956	2.2596e-10	both	0.868738	0.999545	-1	2	1	1	4050	257	439	0.522963
uc007hhg.2	Xrcc6bp1	ENSMUST00000168520	6.87335	14	2.48736	3	8.15347	18	11.6131	19	21.6658	202	17.5965	166	19.2599	248	20.8188	213	0.317244	0.141355	0.42334	0.557817	0.317244	0.141355	0.42334	0.557817	2.11165	1.02079	2.13946	1.09725	0.125112	1	translational_only	0.105206	0.99556	1	2	1	2	1067	83	243	0.549203
uc007hhm.1	Tsfm	ENSMUST00000040560	32.9773	89	28.7845	46	46.8846	137	42.9004	93	69.5346	859	68.882	861	83.3738	1418	98.7594	1336	0.474257	0.417882	0.562342	0.434393	0.474257	0.417882	0.562342	0.434393	1.45373	1.31583	1.11724	0.159941	0.488701	0.0138496	both	0.87019	0.999545	-1	2	1	1	1180	17	188	0.532203
uc007hhq.1	Mettl1	ENSMUST00000006915	42.7242	95	27.3419	36	34.4396	83	26.3149	47	55.6096	566	44.9582	463	49.1488	690	38.4099	429	0.768289	0.608163	0.70072	0.685107	0.768289	0.608163	0.70072	0.685107	0.867101	0.870644	1.00681	0.00979266	-0.101443	1	translational_only	0.641522	0.999545	-1	2	-1	2	887	47	33	0.554679
uc007hhv.2	Cdk4	ENSMUST00000006911	171.733	377	107.885	150	206.098	467	176.25	320	660.53	4328	613.092	4145	626.638	5256	774.971	5385	0.259992	0.175969	0.328896	0.227428	0.259992	0.175969	0.328896	0.227428	1.3674	1.10049	1.27608	0.351724	0.145352	1	translational_only	0.694605	0.999545	1	2	1	2	1346	173	261	0.546805
uc007hhw.1	Tspan31	ENSMUST00000060991	94.7252	164	55.5998	57	144.95	272	105.704	147	98.8374	782	116.919	936	94.9011	1037	135.457	1178	0.958394	0.47554	1.52738	0.780351	0.958394	0.47554	1.52738	0.780351	1.66742	1.06768	1.60937	0.686498	0.19219	1	translational_only	0.0604635	0.929969	1	2	1	2	1543	84	826	0.39663
uc007hia.2	Os9	ENSMUST00000164259	30.9766	175	40.3355	135	49.7859	305	43.3908	197	19.6071	505	18.7835	490	41.1951	1458	28.2839	799	1.57987	2.1474	1.20854	1.53412	1.57987	2.1474	1.20854	1.53412	1.3066	1.8098	0.735836	-0.442543	0.949774	1.45335e-05	both	0.0418829	0.871684	-1	-1	1	1	4049	42	1988	0.544332
uc007hig.3	B4galnt1	ENSMUST00000006914	3.97647	19	3.18099	9	2.89643	15	4.16885	16	6.90404	151	5.46772	121	4.40307	133	5.70821	137	0.575962	0.581776	0.657821	0.730327	0.575962	0.581776	0.657821	0.730327	0.987123	0.817287	1.19902	0.261852	-0.201045	1	translational_only	NA	NA	-1	2	-1	2	2283	66	507	0.591327
uc007hik.2	Arhgef25	ENSMUST00000019611	49.673	258	44.2197	136	30.198	170	26.6058	111	80.1786	1900	79.6587	1910	46.821	1529	48.3408	1255	0.619529	0.555115	0.644968	0.55038	0.619529	0.555115	0.644968	0.55038	0.604987	0.595367	1.01763	0.0252072	-0.653514	8.20083e-05	both	0.661591	0.999545	-1	2	-1	-1	2261	89	315	0.556391
uc007hil.1	Dtx3	ENSMUST00000038217	11.7483	34	7.58608	13	12.4334	39	14.2099	33	20.7041	274	21.4866	288	22.1792	403	27.1303	394	0.567441	0.353061	0.560591	0.523764	0.567441	0.353061	0.560591	0.523764	1.37802	1.16873	1.178	0.236344	0.314704	0.327728	translational_only	0.949536	0.999545	1	2	1	2	1944	314	586	0.566358
uc007hiq.2	Pip4k2c	ENSMUST00000013970	14.7641	52	10.0774	21	21.2187	81	14.4924	41	12.4776	201	11.4913	187	13.7986	306	15.3871	272	1.18325	0.876955	1.53774	0.941854	1.18325	0.876955	1.53774	0.941854	1.43756	1.21764	1.20357	0.26732	0.377871	0.16908	translational_only	0.60785	0.999545	1	2	1	2	3374	111	1997	0.483699
uc007hiw.1	Mbd6	ENSMUST00000026476	13.9363	118	12.3496	62	16.5519	152	16.4514	112	9.666	374	8.78382	344	8.3705	447	9.90877	421	1.44179	1.40595	1.97741	1.66029	1.44179	1.40595	1.97741	1.66029	1.25555	0.990756	1.2774	0.353208	0.0812363	1	translational_only	0.28991	0.999545	1	2	1	2	4046	151	877	0.62086
uc007hiz.2	Mars	ENSMUST00000037290	92.8429	706	67.7361	305	119.39	984	118.532	724	121.477	4211	130.155	4572	200.572	9581	163.662	6228	0.764286	0.520427	0.595247	0.724251	0.764286	0.520427	0.595247	0.724251	1.48165	1.44749	1.02708	0.038543	0.629127	0.000699205	both	0.670453	0.999545	-1	2	1	1	2939	157	73	0.538278
uc007hjf.1	Gli1	ENSMUST00000026474	1.81275	17	1.8008	10	1.08221	11	0.929268	7	3.63959	156	2.83357	123	1.14907	68	1.14705	54	0.498065	0.635523			0.498065	0.635523	0.941815	0.810139	0.556648	0.354713	1.54549	0.628068	-1.39597	1.14152e-08	both	NA	NA	-1	2	-1	-1	3662	161	165	0.580557
uc007hjl.2	R3hdm2	ENSMUST00000077046	11.5991	101	9.85921	51	9.89589	93	11.3133	79	17.4833	657	16.7582	635	13.8465	706	15.5221	637	0.663441	0.588323	0.714683	0.728853	0.663441	0.588323	0.714683	0.728853	0.98839	0.857693	1.1532	0.205644	-0.138722	1	translational_only	0.896803	0.999545	1	2	-1	2	4030	220	675	0.514888
uc007hju.2	Shmt2	ENSMUST00000026470	116.499	438	95.3396	218	140.978	552	114.155	345	144.597	1908	156.065	2053	152.652	2599	171.179	2430	0.805679	0.610896	0.923522	0.666875	0.805679	0.610896	0.923522	0.666875	1.20437	1.07706	1.12271	0.166979	0.154382	1	translational_only	0.842984	0.999545	1	2	1	2	2305	124	666	0.548373
uc007hjx.1	Lrp1	ENSMUST00000049149	69.6014	2680	76.868	1753	132.756	5540	140.354	4341	41.8388	7359	43.5036	7748	82.7964	20061	85.1692	16417	1.66356	1.76693	1.6034	1.64795	1.66356	1.76693	1.6034	1.64795	1.86462	1.96814	0.947778	-0.0773783	1.07117	1.20084e-12	both	0.53653	0.999545	-1	2	1	1	14891	461	792	0.576657
uc007hka.1	Stat6	ENSMUST00000092074	31.0524	219	20.5933	86	20.1465	154	18.182	103	24.7901	799	25.308	826	13.5805	605	15.1022	535	1.25261	0.813708	1.48349	1.20393	1.25261	0.813708	1.48349	1.20393	0.742144	0.572531	1.30058	0.379158	-0.707024	6.20286e-05	both	0.30711	0.999545	1	2	-1	-1	3805	285	1006	0.5159
uc007hkg.2	Tmem194	ENSMUST00000048099	7.65478	28	7.84874	17	9.08042	36	13.2737	39	5.79334	97	7.08326	120	8.90846	206	8.2184	151		1.10807	1.0193	1.61512	1.32131	1.10807	1.0193	1.61512	1.44188	1.33008	1.08441	0.116904	0.511183	0.0625791	translational_only	NA	NA	-1	2	1	2	6001	33	4654	0.415264
uc007hkl.1	Zbtb39	ENSMUST00000054287	5.0069	30	4.79151	17	9.54702	62	7.27225	35	3.17362	87	3.13505	87	3.48813	132	4.08877	123			2.73701	1.77859	1.57766	1.52837	2.73701	1.77859	1.71653	1.20103	1.45381	0.539843	0.35496	0.394468	translational_only	NA	NA	-1	2	1	2	5950	169	3642	0.487731
uc007hle.1	Atp5b	ENSMUST00000026459	559.23	1832	396.335	885	1018.47	3382	842.895	2172	740.136	8367	827.553	9455	1922.46	27230	1308.58	15601	0.755577	0.478924	0.529774	0.644131	0.755577	0.478924	0.529774	0.644131	1.94792	2.06102	0.950915	-0.0726121	1.03644	1.92377e-07	both	0.371087	0.999545	-1	2	1	1	1879	20	269	0.512507
uc007hlj.1	Baz2a	ENSMUST00000045621	7.68039	122	8.17325	77	12.0576	207	16.1128	205	5.84029	422	6.19938	453	8.83147	869	8.70612	685	1.31507	1.3184	1.3653	1.85074	1.31507	1.3184	1.3653	1.85074	1.7769	1.45665	1.22122	0.288322	0.625017	0.000488289	both	0.514365	0.999545	1	2	1	1	8692	478	2550	0.503566
uc007hlm.1	Rbms2	ENSMUST00000092033	31.3604	92	25.8832	47	27.5963	88	33.4077	81	78.8608	723	78.0397	727	70.3208	825	81.3726	762	0.397669	0.331667	0.392435	0.410553	0.397669	0.331667	0.392435	0.410553	1.06569	0.966813	1.10098	0.138794	-0.0621473	1	translational_only	0.904053	0.999545	1	2	-1	2	5207	153	3902	0.456117
uc007hlq.1	Spryd4	ENSMUST00000061995	17.0002	29	3.95997	4	5.4086	10	8.0279	11	17.4172	136	14.8088	117	12.2403	132	12.9543	111	0.97606		0.44187		0.97606	0.267407	0.44187	0.619709	0.641049	0.78181	0.853725	-0.228157	-0.259364	0.79635	translational_only	NA	NA	-1	2	-1	2	1568	1	943	0.502551
uc007hlv.2	Timeless	ENSMUST00000055539	14.9388	151	13.1991	79	25.5652	280	18.6034	151	9.55312	442	9.38002	439	17.1094	1089	11.9294	605	1.56377	1.40715	1.49422	1.55946	1.56377	1.40715	1.49422	1.55946	1.56972	1.53375	1.02786	0.039643	0.71311	0.00193305	both	0.854741	0.999545	-1	2	1	1	4459	180	685	0.535546
uc007hma.1	Stat2	ENSMUST00000085708	3.50115	27	3.05353	14	2.49233	21	4.37643	27	2.81503	97	2.48625	86	2.65263	126	2.23746	84			0.939569		1.24374	1.22817	0.939569	1.95598	1.04792	0.922435	1.17139	0.228216	-0.0126234	1	translational_only	NA	NA	-1	2	-1	2	4394	149	1476	0.500455
uc007hmf.2	Pan2	ENSMUST00000005825	6.06546	61	4.70184	28	7.98145	87	6.93226	56	5.69138	262	5.6034	261	8.85778	563	8.80905	445	1.06573	0.839105	0.901067	0.786948	1.06573	0.839105	0.901067	0.786948	1.38509	1.56416	0.886175	-0.174336	0.742618	5.23137e-05	both	0.318379	0.999545	-1	2	1	1	4423	254	593	0.516618
uc007hmi.1	Cnpy2	ENSMUST00000026446	103.1	154	55.4002	49	91.4176	148	70.8454	85	233.429	1596	236.628	1637	170.712	1612	198.858	1492	0.441677	0.234124	0.535507	0.356261	0.441677	0.234124	0.535507	0.356261	1.02374	0.786226	1.31957	0.400068	-0.250208	0.457336	translational_only	0.603594	0.999545	1	2	-1	2	1017	342	126	0.555556
uc007hmj.1	Cs	ENSMUST00000005826	90.3211	278	64.8245	134	174.717	525	132.518	321	80.7578	800	92.3404	882	145.924	1558	147.475	1381	1.11842	0.702016	1.19731	0.898581	1.11842	0.702016	1.19731	0.898581	1.9803	1.69498	1.15132	0.203284	0.610766	0.000653484	both	0.382207	0.999545	1	2	1	1	2828	86	1347	0.497171
uc007hmm.1	Ankrd52	ENSMUST00000014642	61.1169	555	47.9804	258	86.9703	856	87.4666	638	19.5408	812	19.6631	827	27.9666	1603	31.8325	1452	3.12766	2.44013	3.10979	2.74772	3.12766	2.44013	3.10979	2.74772	1.59891	1.52534	1.05204	0.0731839	0.705048	5.06893e-05	both	0.810488	0.999545	1	2	1	1	6615	99	3285	0.541345
uc007hmq.1	Nabp2	ENSMUST00000026439	45.7588	80	34.7747	36	70.7161	134	58.3918	82	62.4795	500	61.0083	494	98.8025	1092	108.407	952	0.732381	0.569999	0.715732	0.538635	0.732381	0.569999	0.715732	0.538635	1.60316	1.67798	0.963134	-0.0541912	0.843322	7.98502e-07	both	0.48693	0.999545	-1	2	1	1	1052	84	329	0.553232
uc007hms.2	Rnf41	ENSMUST00000096386	14.2163	37	18.0119	28	23.3969	66	22.9604	48	29.0503	319	31.6947	348	29.2535	429	34.678	409	0.489369	0.568295	0.799799	0.662104	0.489369	0.568295	0.799799	0.662104	1.43841	1.05246	1.3822	0.466967	0.138642	1	translational_only	0.356141	0.999545	1	2	1	2	4377	416	3007	0.45899
uc007hmx.2	Smarcc2	ENSMUST00000105235	41.1327	421	35.6496	216	37.9818	421	39.5313	325	26.9891	1262	25.6664	1213	27.1728	1748	24.6502	1261	1.52405	1.38896	1.39779	1.60369	1.52405	1.38896	1.39779	1.60369	1.00952	0.984191	1.03037	0.0431626	0.0707562	1	translational_only	0.832892	0.999545	-1	2	1	2	4935	91	1202	0.527457
uc007hng.1	Esyt1	ENSMUST00000026427	40.2652	371	32.7983	179	51.4534	514	46.1957	342	33.3303	1404	35.2527	1503	38.3658	2232	39.7283	1837	1.20807	0.930377	1.34113	1.16279	1.20807	0.930377	1.34113	1.16279	1.3365	1.13868	1.17091	0.227627	0.284956	0.25122	translational_only	0.657463	0.999545	1	2	1	2	3685	36	370	0.562008
uc007hni.1	Zc3h10	ENSMUST00000040572	6.32208	23	6.02996	13	9.88299	39	10.6001	31	11.95	199	13.116	221	11.7236	269	13.7127	250	0.529044	0.45974	0.843002	0.773014	0.529044	0.45974	0.843002	0.773014	1.65828	1.01477	1.63435	0.708714	0.1119	1	translational_only	0.160295	0.999545	1	2	1	2	2089	167	614	0.571087
uc007hnl.1	Pa2g4	ENSMUST00000026425	100.64	242	50.5306	86	157.461	365	116.081	225	87.0886	671	92.1797	715	352.655	2466	149.988	1055	1.1556	0.548175	0.446502	0.773934	1.1556	0.548175	0.446502	0.773934	1.80949	2.80386	0.716312	-0.48134	1.09493	9.6171e-05	both	0.193147	0.999545	-1	2	1	1	2432	107	1140	0.456003
uc007hnt.2	Suox	ENSMUST00000054764	5.45504	25	5.52746	15	10.67	53	5.16137	19	6.14937	129	9.13982	194	10.9828	318	10.2519	236	0.88709	0.604767	0.971514	0.503453	0.88709	0.604767	0.971514	0.503453	1.44151	1.38887	0.988679	-0.0164263	0.572615	0.0376989	both	NA	NA	-1	2	1	1	2349	78	630	0.479353
uc007hny.2	Cdk2	ENSMUST00000026416	41.2806	119	25.1909	43	42.5259	133	47.5523	110	34.3814	451	31.3694	418	30.8006	558	36.3352	522	1.20067	0.803041	1.38069	1.30871	1.20067	0.803041	1.38069	1.30871	1.35514	1.02107	1.34221	0.424609	0.121057	1	translational_only	0.253132	0.999545	1	2	1	2	2432	224	1167	0.462993
uc007hoc.1	Dgka	ENSMUST00000026414	4.07055	25	3.573	13	6.00624	40	3.446	17	3.02214	85	1.82723	52	3.56085	138	2.72539	84			1.68674		1.34691	1.95541	1.68674	1.26441	1.23663	1.2963	0.893659	-0.162204	0.474908	0.375121	translational_only	NA	NA	-1	2	1	2	2813	333	287	0.514397
uc007hod.3	Pym1	ENSMUST00000163377	16.0395	26	7.16768	7	13.3	23	8.34625	11	26.2928	159	27.5608	169	26.6391	202	27.1532	169	0.610036	0.260068	0.499265	0.307376	0.610036	0.260068	0.499265	0.307376	0.932736	0.998863	0.927063	-0.109261	-0.0226052	1	translational_only	0.691223	0.999545	-1	2	-1	2	1173	83	478	0.560102
uc007hoh.3	Mmp19	ENSMUST00000026411	9.49869	42	9.5484	25	4.17324	20	7.3205	26	5.92896	120	6.49447	133	4.07831	114	3.96216	88	1.60208	1.47024	1.02328		1.60208	1.47024	1.02328	1.8476	0.603438	0.647203	0.934434	-0.0978357	-0.528098	0.0486847	both	NA	NA	-1	2	-1	-1	3411	100	1727	0.410437
uc007hoi.1	Tmem198b	ENSMUST00000051011	15.7562	46	17.9321	31	19.6126	62	18.3364	43	17.4281	232	17.932	242	15.6107	287	19.1121	280	0.904067	1.00001	1.25636	0.959416	0.904067	1.00001	1.25636	0.959416	1.12648	0.981976	1.1637	0.218721	0.0680473	1	translational_only	0.757818	0.999545	1	2	1	2	2335	223	1059	0.483512
uc007hom.1	Dnajc14	ENSMUST00000026410	25.0316	148	24.5524	86	30.7266	197	41.04	195	32.1183	868	30.3754	831	43.3616	1613	27.0641	803	0.779355	0.8083	0.708614	1.5164	0.779355	0.8083	0.708614	1.5164	1.44737	1.12692	1.40145	0.486916	0.268704	0.792132	translational_only	0.471903	0.999545	1	2	1	2	4229	82	2035	0.460629
uc007hot.1	Gdf11	ENSMUST00000026408	8.85932	30	8.47821	17	17.7249	65	18.3824	50	5.61751	87	6.63671	104	15.0075	321	13.2869	226			1.18107	1.3835	1.57709	1.27747	1.18107	1.3835	2.08261	2.30895	0.898412	-0.15455	1.30713	2.88608e-10	both	NA	NA	-1	2	1	1	1811	33	560	0.574821
uc007hpa.1	Itga7	ENSMUST00000099112	0.208547	2	0.88048	5	32.7101	340	35.4397	273	0.843114	37	1.35163	60	42.1846	2553	48.4259	2330			0.775402	0.731833	0.247353	0.65142	0.775402	0.731833	62.5785	41.2852	1.67699	0.745875	5.45943	3.7438e-133	both	NA	NA	-1	2	1	1	4020	176	433	0.569652
uc007hse.2	Eif4enif1	ENSMUST00000110049	20.4426	168	20.6343	101	15.2737	136	15.4041	102	24.5554	904	22.1693	829	20.4216	1027	17.9562	730	0.832509	0.930763	0.747921	0.857874	0.832509	0.930763	0.747921	0.857874	0.746838	0.821359	0.91069	-0.134968	-0.192357	0.857399	translational_only	0.357163	0.999545	-1	2	-1	2	3694	243	499	0.493774
uc007hsh.1	Drg1	ENSMUST00000020741	50.5453	153	32.089	58	40.9569	135	36.639	90	72.1014	957	76.1743	1030	72.696	1304	69.3436	1010	0.70103	0.421258	0.5634	0.528369	0.70103	0.421258	0.5634	0.528369	0.939028	0.957942	0.972806	-0.0397754	0.0150353	1	translational_only	0.612642	0.999545	-1	2	1	2	1524	76	344	0.431102
uc007hsn.2	Patz1	ENSMUST00000057089	12.989	70	12.8481	41	15.0657	88	22.1886	96	13.3775	330	14.0224	350	14.0377	478	15.2199	412	0.97096	0.916251	1.07324	1.45787	0.97096	0.916251	1.07324	1.45787	1.44189	1.0678	1.34119	0.423514	0.190595	0.905429	translational_only	0.374557	0.999545	1	2	1	2	3100	157	1017	0.527097
uc007hsq.1	Pik3ip1	ENSMUST00000045153	6.85052	15	10.0266	13	6.32052	15	7.39144	13	11.2744	113	8.67746	88	5.92389	82	6.18268	68	0.607617				0.607617	1.15547	1.06695	1.19551	0.81246	0.606789	1.28324	0.359788	-0.624097	0.0375477	both	NA	NA	-1	2	-1	-1	2243	204	1244	0.532769
uc007htc.1	Selm	ENSMUST00000123677	49.3842	57	25.955	18	27.6389	35	23.3856	22	101.259	514	89.2027	464	44.3421	318	62.709	360	0.487702	0.290967	0.623309	0.372923	0.487702	0.290967	0.623309	0.372923	0.677263	0.562062	1.2794	0.355471	-0.708255	0.00265073	both	0.682151	0.999545	1	2	-1	-1	1460	59	966	0.576712
uc007htd.1	Selm	ENSMUST00000123677	73.9656	86	32.9262	23	33.7114	43	35.8814	34	152.69	781	129.175	677	69.2026	500	85.0706	492	0.484418	0.254895	0.487141	0.421784	0.484418	0.254895	0.487141	0.421784	0.651059	0.54733	1.22942	0.297976	-0.744859	0.000225001	both	0.773657	0.999545	1	2	-1	-1	872	243	191	0.608945
uc007htm.1	Morc2a	ENSMUST00000093389	17.4262	151	14.3894	74	16.7005	157	15.4966	108	10.0242	395	9.35223	373	11.2053	606	8.84007	382	1.73841	1.53861	1.49041	1.753	1.73841	1.53861	1.49041	1.753	1.01199	1.03452	0.989743	-0.0148748	0.143644	1	translational_only	0.692295	0.999545	-1	2	1	2	5087	725	1269	0.49538
uc007htv.1	Slc35e4	ENSMUST00000051207	36.3078	106	42.8057	74	46.7718	148	70.7872	166	87.8919	1170	93.1012	1254	82.7857	1522	103.953	1520	0.413096	0.459776	0.564974	0.680954	0.413096	0.459776	0.564974	0.680954	1.48596	1.03175	1.42739	0.51338	0.142452	1	translational_only	0.437126	0.999545	1	2	1	2	3059	1477	529	0.607061
uc007hua.1	Pes1	ENSMUST00000020705	6.50732	28	1.8178	5	6.14942	28	2.87068	10	2.29555	39	1.78011	32	10.6205	151	2.6343	49			0.579015		2.83475	1.02117	0.579015	1.08973	1.08348	3.25218	0.432774	-1.20831	1.23131	0.0138381	both	NA	NA	-1	2	1	1	2911	62	1094	0.449674
uc007hui.1	Rnf215	ENSMUST00000003677	10.7404	34	8.00222	15	12.824	44	8.66754	22	16.4691	238	15.3467	224	11.3735	227	14.4664	229	0.652159	0.521431	1.12753	0.599152	0.652159	0.521431	1.12753	0.599152	1.14667	0.812174	1.47128	0.557076	-0.208237	0.991292	translational_only	0.281983	0.999545	1	2	-1	2	1936	113	683	0.527376
uc007hup.2	Sf3a1	ENSMUST00000002198	40.8046	267	27.4379	107	37.5179	267	32.4145	170	26.6044	740	24.9985	716	25.4378	964	23.3065	719	1.53375	1.09758	1.47489	1.39079	1.53375	1.09758	1.47489	1.39079	1.02476	0.944606	1.08906	0.123081	0.000796354	1	translational_only	0.823319	0.999545	1	2	1	2	4916	134	2406	0.472539
uc007huq.1	Tbc1d10a	ENSMUST00000041042	20.5266	86	25.3771	63	20.4938	93	16.0351	54	42.5652	813	40.9219	793	26.7819	706	31.9141	668	0.482239	0.620135	0.765213	0.502446	0.482239	0.620135	0.765213	0.502446	0.795774	0.703055	1.14994	0.201554	-0.416046	0.0611099	translational_only	0.92689	0.999545	1	2	-1	2	1913	58	352	0.602196
uc007hur.1	Gatsl3	ENSMUST00000020699	6.16336	17	3.06136	5	7.35902	22	6.33201	14	8.27123	104	9.47178	121	8.15198	142	10.4765	145			0.902728	0.604399	0.745156	0.323209	0.902728	0.604399	1.48417	1.04991	1.41069	0.496396	0.16142	1	translational_only	NA	NA	-1	2	1	2	1548	63	489	0.570413
uc007hux.1	Mtmr3	ENSMUST00000109943	12.2282	119	8.48849	49	12.5219	132	11.7387	92	13.3209	587	12.7653	568	8.48809	514	9.55612	464	0.917972	0.664965	1.47523	1.2284	0.917972	0.664965	1.47523	1.2284	1.17107	0.691716	1.70798	0.772294	-0.434853	0.0430203	both	0.0263603	0.726869	1	1	-1	-1	5674	294	1900	0.517096
uc007hva.2	Ascc2	ENSMUST00000070257	14.1141	89	13.6587	51	15.3701	105	15.2022	77	10.844	313	10.2128	298	14.1234	562	10.902	345	1.30156	1.3374	1.08827	1.39444	1.30156	1.3374	1.08827	1.39444	1.1008	1.18847	0.94079	-0.0880553	0.348486	0.276099	translational_only	0.443677	0.999545	-1	2	1	2	2605	47	308	0.521689
uc007hvd.1	Zmat5	ENSMUST00000009220	15.8063	22	9.70676	8	15.2463	23	21.4671	24	27.4681	175	24.8202	160	29.4353	259	35.6158	249	0.575442	0.391083	0.51796	0.60274	0.575442	0.391083	0.51796	0.60274	1.439	1.24408	1.15951	0.21352	0.408125	0.151124	translational_only	0.903506	0.999545	-1	2	1	2	789	71	205	0.577947
uc007hvf.2	Nf2	ENSMUST00000109910	15.1951	76	18.2228	54	16.9518	92	20.9085	84	13.4399	307	11.2302	260	15.1029	477	10.9921	276	1.1306	1.62266	1.12242	1.90214	1.1306	1.62266	1.12242	1.90214	1.13294	1.05776	1.09854	0.135583	0.183108	1	translational_only	0.962871	0.999545	-1	2	1	2	4728	559	2378	0.49154
uc007hvk.1	Nipsnap1	ENSMUST00000038570	8.4769	20	5.72629	8	11.3542	29	8.45282	16	5.55573	60	5.59574	61	7.66153	114	9.7999	116			1.48197	0.862541	1.52579	1.02333	1.48197	0.862541	1.39454	1.56584	0.919732	-0.120715	0.733853	0.00867614	both	NA	NA	-1	2	1	1	1874	3	1016	0.498933
uc007hvl.1	Thoc5	ENSMUST00000038237	19.4931	112	14.1085	48	15.7369	98	14.5175	67	18.7453	493	17.7371	472	18.8499	684	16.0774	464	1.03989	0.795423	0.834854	0.902973	1.03989	0.795423	0.834854	0.902973	0.900384	0.957373	0.946882	-0.0787436	0.0358319	1	translational_only	0.478681	0.999545	-1	2	1	2	2235	56	127	0.519911
uc007hvn.2	Ap1b1	ENSMUST00000009234	22.2413	178	14.5653	69	29.103	252	20.8227	134	17.707	645	18.1577	669	18.3186	916	21.2897	851	1.25607	0.802154	1.58871	0.978069	1.25607	0.802154	1.58871	0.978069	1.35644	1.10438	1.24709	0.318561	0.235687	0.568915	translational_only	0.427868	0.999545	1	2	1	2	4315	451	1002	0.557358
uc007hvv.2	Gas2l1	ENSMUST00000056649	25.7751	147	34.0531	115	17.3185	107	24.012	110	39.4942	1030	38.9763	1028	22.5717	813	25.1808	721	0.652629	0.873688	0.767266	0.953586	0.652629	0.873688	0.767266	0.953586	0.690821	0.608541	1.12745	0.173068	-0.619364	0.000540886	both	0.972383	0.999713	1	2	-1	-1	2586	133	416	0.622583
uc007hwh.1	Kremen1	ENSMUST00000020662	11.6146	46	11.9393	28	6.9837	30	9.74451	31	10.7717	195	9.67695	177	3.55718	89	4.63116	92	1.07825	1.23379			1.07825	1.23379	1.96327	2.10412	0.71021	0.400435	1.75922	0.814936	-1.23087	5.35087e-08	both	NA	NA	-1	2	-1	-1	4907	85	3400	0.504381
uc007hwj.2	Znrf3	ENSMUST00000109867	3.89732	30	4.38784	20	9.10935	76	8.89857	55	2.64137	93	2.47106	88	3.15105	153	4.06948	157			2.89089	2.18666	1.47549	1.77569	2.89089	2.18666	2.17351	1.41235	1.56176	0.64317	0.58575	0.0349112	both	NA	NA	-1	2	1	1	6306	169	3395	0.481763
uc007hwt.1	Mrps24	ENSMUST00000154330	68.7945	94	59.3258	48	73.6006	109	50.112	55	241.427	1510	244.009	1541	171.691	1480	211.849	1454	0.28495	0.243129	0.42868	0.236546	0.28495	0.243129	0.42868	0.236546	0.965598	0.790094	1.25971	0.333091	-0.243285	0.557953	translational_only	0.919761	0.999545	1	2	-1	2	1007	37	466	0.42006
uc007hwu.1	Urgcp	ENSMUST00000093362	15.8813	124	14.9296	69	14.4163	122	19.2931	121	20.1249	719	21.4864	777	14.6272	722	15.3751	603	0.789138	0.694839	0.985578	1.25483	0.789138	0.694839	0.985578	1.25483	1.09408	0.721014	1.50973	0.594295	-0.374371	0.0853915	translational_only	0.168045	0.999545	1	2	-1	2	5115	66	2268	0.492082
uc007hxb.2	Dbnl	ENSMUST00000102928	74.2295	269	38.7095	83	42.5177	167	30.2315	88	87.8491	1447	79.7914	1334	45.7692	1042	47.6883	864	0.844966	0.485134	0.928959	0.633939	0.844966	0.485134	0.928959	0.633939	0.644146	0.557488	1.17502	0.232689	-0.745901	1.15956e-05	both	0.733483	0.999545	1	2	-1	-1	2360	77	981	0.538136
uc007hxk.2	Pold2	ENSMUST00000102922	49.916	196	48.5652	113	50.5186	215	50.7291	160	80.0085	1437	82.5952	1501	80.0868	1988	92.5459	1824	0.623884	0.587991	0.630798	0.548151	0.623884	0.587991	0.630798	0.548151	1.02809	1.06168	0.972831	-0.0397394	0.183802	0.871296	translational_only	0.515263	0.999545	-1	2	1	2	1610	122	78	0.583851
uc007hxp.3	Ykt6	ENSMUST00000002818	65.4368	102	38.3764	36	33.4351	57	31.766	41	66.3319	408	60.4283	384	36.9747	326	32.8592	240	0.986505	0.635073	0.904269	0.96673	0.986505	0.635073	0.904269	0.96673	0.628062	0.550913	1.15381	0.20641	-0.692745	0.000320055	both	0.888366	0.999545	1	2	-1	-1	2477	143	1737	0.51958
uc007hxy.2	Nudcd3	ENSMUST00000066496	39.2763	119	35.1156	63	35.9331	118	27.5304	67	23.3621	324	23.3029	327	17.9935	344	17.5441	267	1.6812	1.50692	1.99701	1.56921	1.6812	1.50692	1.99701	1.56921	0.853096	0.761547	1.1186	0.161688	-0.296064	0.322939	translational_only	0.735665	0.999545	1	2	-1	2	3962	317	2553	0.515396
uc007hyc.1	Ddx56	ENSMUST00000004507	38.6217	177	26.5318	72	45.4983	226	34.4997	127	50.5279	1058	52.3419	1111	52.1166	1509	57.2898	1318	0.764363	0.506894	0.87301	0.602196	0.764363	0.506894	0.87301	0.602196	1.22784	1.06354	1.16043	0.214661	0.18638	0.826103	translational_only	0.859645	0.999545	1	2	1	2	3287	10	1636	0.467904
uc007hye.1	Tmed4	ENSMUST00000004508	42.2235	78	25.4028	28	55.0296	109	46.0386	68	40.5033	332	39.3065	326	54.7674	620	61.9195	542	1.04247	0.646274	1.00479	0.743524	1.04247	0.646274	1.00479	0.743524	1.49451	1.46206	1.03527	0.0500096	0.623398	0.00101379	both	0.820033	0.999545	-1	2	1	1	1625	4	937	0.465231
uc007hyg.2	Ogdh	ENSMUST00000003461	35.5775	311	32.6285	169	54.2333	514	41.8983	294	21.1114	842	24.7565	1001	35.8364	1965	35.4499	1549	1.68522	1.31798	1.51336	1.1819	1.68522	1.31798	1.51336	1.1819	1.40943	1.55417	0.897463	-0.156076	0.728273	2.98497e-05	both	0.39353	0.999545	-1	2	1	1	6660	123	3420	0.40991
uc007hyp.2	H2afv	ENSMUST00000109737	56.1705	58	34.2521	21	50.9312	57	43.286	36	191.148	849	204.772	931	167.747	1011	195.642	948	0.293859	0.167269	0.303619	0.221251	0.293859	0.167269	0.303619	0.221251	1.04197	0.917835	1.13823	0.186792	-0.0520912	1	translational_only	0.886543	0.999545	-1	2	-1	2	1636	104	1145	0.394866
uc007hyr.3	Purb	ENSMUST00000179343	56.9637	146	43.0072	67	52.6839	147	47.9384	100	32.5204	363	32.4035	363	27.3351	417	31.3861	384	1.75163	1.32724	1.92734	1.52738	1.75163	1.32724	1.92734	1.52738	1.00652	0.904463	1.12207	0.166165	-0.051843	1	translational_only	0.686133	0.999545	1	2	-1	2	8478	190	7313	0.384053
uc007hyv.2	Ccm2	ENSMUST00000000388	32.4227	123	26.7099	60	14.1059	58	26.2535	80	135.013	2341	143.752	2522	54.6212	1308	69.2172	1317	0.240145	0.185805	0.25825	0.379292	0.240145	0.185805	0.25825	0.379292	0.682524	0.444238	1.49676	0.581839	-1.07407	1.53321e-09	both	0.563034	0.999545	1	2	-1	-1	1875	113	400	0.531733
uc007hza.2	Tbrg4	ENSMUST00000189268	38.3322	203	28.0625	88	45.4712	261	49.6024	211	61.4906	1489	61.9811	1517	69.1376	2306	79.8395	2117	0.623382	0.452759	0.657692	0.621277	0.623382	0.452759	0.657692	0.621277	1.43195	1.20657	1.18848	0.249114	0.36518	0.0951762	translational_only	0.844923	0.999545	1	2	1	2	3139	231	1015	0.558777
uc007hzk.1	Tns3	ENSMUST00000020695	33.6067	409	29.9732	216	24.4225	322	25.8868	253	13.8742	772	13.5972	765	10.1429	780	10.6453	650	2.42225	2.20436	2.40785	2.43176	2.42225	2.20436	2.40785	2.43176	0.791276	0.756718	1.04604	0.0649369	-0.304146	0.225974	translational_only	0.96519	0.999713	1	2	-1	2	7483	318	2842	0.524923
uc007iba.2	Grb10	ENSMUST00000093321	199.71	1000	160.203	475	267.36	1451	240.425	967	54.699	1253	58.6262	1355	66.8516	2109	71.6095	1796	3.65108	2.73261	3.9993	3.35745	3.65108	2.73261	3.9993	3.35745	1.41086	1.2218	1.15243	0.204679	0.384905	0.0576518	translational_only	0.307806	0.999545	1	2	1	2	5089	334	2964	0.482217
uc007ibo.1	Egfr	ENSMUST00000020329	11.2638	115	6.94146	42	8.22122	91	6.58284	54	4.6679	217	4.65327	219	4.32154	278	4.57554	234	2.41303	1.49174	1.90238	1.4387	2.41303	1.49174	1.90238	1.4387	0.813176	0.954503	0.855642	-0.224921	0.0318181	1	translational_only	0.301237	0.999545	-1	2	1	2	5965	280	2052	0.468064
uc007ica.1	Ppp3r1	ENSMUST00000102880	65.1922	90	29.1796	24	52.1287	78	34.198	38	31.0475	197	23.6755	152	20.4374	178	17.6652	123	2.09976	1.23248	2.55066	1.9359	2.09976	1.23248	2.55066	1.9359	0.914751	0.696281	1.34641	0.429116	-0.425524	0.197306	translational_only	NA	NA	-1	2	-1	2	2829	242	2074	0.406504
uc007icc.1	Pno1	ENSMUST00000020317	58.9145	121	34.5352	42	70.0794	156	59.404	98	92.0305	864	85.8887	817	96.6168	1251	108.856	1123	0.640163	0.402092	0.725333	0.545713	0.640163	0.402092	0.725333	0.545713	1.3856	1.15487	1.21952	0.286308	0.303329	0.249419	translational_only	0.747582	0.999545	1	2	1	2	1563	82	734	0.428663
uc007icd.1	Wdr92	ENSMUST00000046955	8.05668	24	5.66919	10	8.0528	26	7.94057	19	6.52706	89	6.81319	94	8.54932	161	6.14849	92			0.941924		1.23435	0.832091	0.941924	1.29147	1.1652	1.10176	1.08079	0.112088	0.247561	1	translational_only	NA	NA	-1	2	1	2	3431	71	2286	0.303702
uc007ice.1	C1d	ENSMUST00000000594	28.1699	31	13.6018	9	22.8128	27	6.60112	6	52.9402	218	48.1417	205	44.5887	248	42.8556	190	0.532108	0.282536	0.511627	0.154032	0.532108	0.282536	0.511627	0.154032	0.70416	0.865085	0.817116	-0.291387	-0.155294	1	translational_only	0.218646	0.999545	-1	2	-1	2	2957	50	2481	0.358471
uc007icf.2	Etaa1	ENSMUST00000076661	2.85618	21	3.2058	14	1.12764	9	2.53987	15	3.17151	103	3.00553	99	3.86096	170	2.62608	94			0.292062		0.900576	1.06663	0.292062	0.96717	0.605002	1.05019	0.640111	-0.643607	0.163662	1	translational_only	NA	NA	-1	2	1	2	4192	81	1477	0.379771
uc007icv.1	Rab1a	ENSMUST00000163483	250.413	396	131.623	127	174.365	301	117.198	151	148.588	1014	147.336	1027	139.896	1306	114.757	861	1.68528	0.893349	1.24639	1.02127	1.68528	0.893349	1.24639	1.02127	0.763184	0.860535	0.879405	-0.1854	-0.130789	1	translational_only	0.415697	0.999545	-1	2	-1	2	2657	28	2011	0.33233
uc007icw.1	Cep68	ENSMUST00000050611	10.2108	63	9.30621	34	8.82264	59	7.26396	36	9.0373	255	7.87368	225	4.97599	194	5.71381	177	1.12985	1.18194	1.77304	1.2713	1.12985	1.18194	1.77304	1.2713	0.824237	0.632121	1.31688	0.397124	-0.567845	0.0144921	both	0.293686	0.999545	1	2	-1	-1	4810	159	2449	0.452183
uc007idb.2	Slc1a4	ENSMUST00000109594	37.4096	167	27.238	72	25.0081	121	22.0316	79	19.7243	401	23.3679	481	13.4981	379	12.9541	289	1.89663	1.16562	1.85271	1.70075	1.89663	1.16562	1.85271	1.70075	0.727634	0.613852	1.16041	0.214634	-0.605437	0.00274393	both	0.544982	0.999545	1	2	-1	-1	3926	241	2086	0.528782
uc007ide.1	Sertad2	ENSMUST00000109586	34.6098	89	31.5229	48	28.7031	80	21.3017	44	13.8478	163	14.7775	176	9.90366	161	9.68797	125	2.49931	2.13318	2.89823	2.19878	2.49931	2.13318	2.89823	2.19878	0.756128	0.684419	1.10028	0.137865	-0.448858	0.0869355	translational_only	NA	NA	-1	2	-1	2	5519	301	4288	0.453343
uc007idl.1	Peli1	ENSMUST00000093290	8.86577	31	5.79578	12	7.38825	28	8.90119	25	5.93555	95	5.68094	92	5.84532	129	5.80752	102			1.26396		1.49367	1.02022	1.26396	1.5327	1.11103	1.00313	1.11248	0.153785	0.101168	1	translational_only	NA	NA	-1	2	1	2	3485	424	1804	0.413486
uc007idv.2	Mdh1	ENSMUST00000102874	131.656	365	72.3411	119	128.257	385	92.0565	205	184.275	2286	197.751	2477	193.513	3267	209.934	2831	0.714452	0.365819	0.66278	0.438502	0.714452	0.365819	0.66278	0.438502	1.07998	1.05607	1.01945	0.0277904	0.160524	0.998019	translational_only	0.769154	0.999545	-1	2	1	2	1958	202	751	0.431052
uc007ieb.2	Ehbp1	ENSMUST00000109563	6.44452	67	5.19807	32	3.81604	43	3.4727	29	2.45925	117	2.86754	138	2.29749	151	1.85748	97	2.62052	1.81273	1.66096		2.62052	1.81273	1.66096	1.86958	0.626041	0.780014	0.796377	-0.328476	-0.252304	0.854211	translational_only	NA	NA	-1	2	-1	2	5048	397	955	0.445919
uc007iei.2	B3gnt2	ENSMUST00000160826	14.7663	49	12.7231	25	12.7897	46	16.1323	43	18.8947	287	19.8451	305	15.6831	329	16.9184	282	0.781504	0.641119	0.815512	0.953536	0.781504	0.641119	0.815512	0.953536	1.05212	0.841552	1.24351	0.314419	-0.15274	1	translational_only	0.664949	0.999545	1	2	-1	2	2576	128	1254	0.41809
uc007iel.1	Commd1	ENSMUST00000159081	90.8039	140	62.4349	57	47.6247	79	28.4181	35	161.018	1103	146.44	1015	103.025	971	136.896	1031	0.563935	0.42635	0.462263	0.207589	0.563935	0.42635	0.462263	0.207589	0.496237	0.780336	0.676423	-0.564002	-0.263234	0.57627	translational_only	0.035389	0.827193	-1	-1	-1	2	818	29	222	0.482885
uc007ieo.1	Cct4	ENSMUST00000173867	174.543	714	112.103	286	168.505	744	145.523	498	154.635	2499	162.943	2658	258.182	5273	166.803	2932	1.12874	0.687985	0.65266	0.872425	1.12874	0.687985	0.65266	0.872425	1.09553	1.3382	0.839467	-0.252454	0.438942	0.100548	translational_only	0.275574	0.999545	-1	2	1	2	1966	161	185	0.440488
uc007iet.1	Xpo1	ENSMUST00000020538	40.604	367	31.2029	167	56.347	552	53.4426	388	41.5751	1719	39.9771	1673	72.9175	4143	56.991	2585	0.976642	0.780519	0.77275	0.937737	0.976642	0.780519	0.77275	0.937737	1.52896	1.59295	0.973438	-0.0388396	0.765313	4.88332e-05	both	0.52304	0.999545	-1	2	1	1	5144	438	1490	0.34098
uc007ifh.1	0610010F05Rik	ENSMUST00000180260	5.95764	36	3.07426	11	5.19135	34	4.12055	20	3.65154	101	4.00191	112	4.32135	165	2.60276	79	1.63154		1.20132		1.63154	0.768198	1.20132	1.58314	1.031	0.904705	1.16032	0.214523	-0.0347332	1	translational_only	NA	NA	-1	2	-1	2	4140	278	1705	0.371498
uc007ifj.1	Pex13	ENSMUST00000020523	7.48279	25	3.00991	6	8.56805	31	4.82375	13	10.2303	144	12.3279	178	10.3836	200	11.9563	184	0.731433	0.244154	0.825151	0.403448	0.731433	0.244154	0.825151	0.403448	1.2763	0.990324	1.25934	0.332671	0.0600581	1	translational_only	NA	NA	-1	2	1	2	4122	91	2813	0.341339
uc007ifk.1	Pus10	ENSMUST00000109525	13.3434	59	4.96517	13	12.7284	61	8.72829	31	6.27481	127	5.71318	117	8.55013	239	7.52874	167	2.1265	0.869073	1.48868	1.15933	2.1265	0.869073	1.48868	1.15933	1.17195	1.34125	0.883973	-0.177926	0.52353	0.0391031	both	NA	NA	-1	2	1	1	3187	86	1517	0.410104
uc007igf.2	Vrk2	ENSMUST00000078362	7.34949	31	7.60721	19	4.81224	22	4.72247	16	10.2621	198	9.93059	194	8.03085	214	7.60922	161	0.71618	0.766038	0.599219	0.620625	0.71618	0.766038	0.599219	0.620625	0.637487	0.774542	0.822985	-0.281062	-0.270006	0.543983	translational_only	0.216972	0.999545	-1	2	-1	2	1891	336	43	0.47065
uc007igp.1	Pnpt1	ENSMUST00000020756	9.09876	60	6.40246	25	12.3124	88	9.06203	48	9.67379	292	11.5024	351	18.9748	790	14.6183	484	0.940558	0.55662	0.64888	0.619908	0.940558	0.55662	0.64888	0.619908	1.37889	1.58637	0.847453	-0.238794	0.765416	0.000392526	both	0.243284	0.999545	-1	2	1	1	2704	7	345	0.405695
uc007igs.2	Smek2	ENSMUST00000020755	21.4674	148	13.2278	54	14.9887	112	13.5324	75	8.1189	256	6.87842	219	9.63826	418	8.78581	303	2.64413	1.92309	1.55513	1.54026	2.64413	1.92309	1.55513	1.54026	0.822049	1.22849	0.677741	-0.561194	0.391665	0.144645	translational_only	0.0162217	0.607887	-1	-1	1	2	5108	399	2246	0.400352
uc007igu.1	Cfap36	ENSMUST00000020754	18.8806	54	15.3522	26	11.9358	37	10.4469	24	18.5614	243	17.9093	237	24.8206	447	14.5624	209	1.0172	0.857223	0.480885	0.717386	1.0172	0.857223	0.480885	0.717386	0.653838	1.07985	0.639276	-0.64549	0.210578	1	translational_only	0.0122137	0.591055	-1	-1	1	2	1523	143	348	0.390676
uc007igz.2	Prorsd1	ENSMUST00000133103	10.8432	15	7.32473	6	0.66695	1	4.49974	5	18.8314	119	17.4807	112	4.46867	39	4.74913	33	0.575801				0.575801	0.419017	0.14925	0.947488	0.284386	0.253849	1.10245	0.140714	-1.8801	4.75251e-14	both	NA	NA	-1	2	-1	-1	2037	33	1494	0.26215
uc007ihk.2	Rtn4	ENSMUST00000102843	108.576	1060	84.4665	489	127.546	1350	114.409	899	76.8875	3421	86.4037	3891	97.8321	5996	67.7495	3305	1.41214	0.977579	1.30372	1.68871	1.41214	0.977579	1.30372	1.68871	1.25338	1.01403	1.25221	0.324474	0.115927	1	translational_only	0.424628	0.999545	1	2	1	2	6165	291	2385	0.422547
uc007ihs.1	Sptbn1	ENSMUST00000006629	22.3213	446	28.7206	340	15.4688	335	17.0195	273	12.2205	1115	14.5969	1347	26.2155	3280	16.0739	1608	1.82655	1.96758	0.590065	1.05882	1.82655	1.96758	0.590065	1.05882	0.636503	1.57694	0.43459	-1.20227	0.750076	0.0047411	both	6.69492e-07	0.00352153	-1	-1	1	1	8239	46	1101	0.485981
uc007ihx.1	Psme4	ENSMUST00000041231	16.1638	252	14.2986	132	16.9845	287	14.6133	183	16.0926	1148	15.1979	1097	16.3747	1613	15.7989	1237	1.00443	0.940824	1.03724	0.924954	1.00443	0.940824	1.03724	0.924954	1.03727	1.02822	1.00871	0.0125121	0.137763	1	translational_only	0.700935	0.999545	-1	2	1	2	6442	208	702	0.41633
uc007iic.1	Erlec1	ENSMUST00000073192	16.7974	68	10.8463	26	10.028	44	13.8388	45	17.215	319	19.0405	357	18.8471	482	17.0274	346	0.975743	0.569644	0.532072	0.812738	0.975743	0.569644	0.532072	0.812738	0.863372	0.989491	0.870209	-0.200566	0.0833222	1	translational_only	0.250838	0.999545	-1	2	1	2	3501	56	1993	0.324764
uc007iif.1	Asb3	ENSMUST00000020551	8.8542	39	5.36771	14	6.70291	32	2.54379	9	7.89121	159	9.3686	191	7.29023	203	5.74016	127	1.12203	0.572947	0.919438	0.443156	1.12203	0.572947	0.919438	0.443156	0.650173	0.754956	0.803899	-0.314913	-0.299771	0.558521	translational_only	NA	NA	-1	2	-1	2	3225	185	1462	0.393798
uc007iik.1	Stc2	ENSMUST00000020546	12.1892	30	15.7819	23	22.4923	60	30.8558	61	16.2438	183	13.4222	153	20.8881	325	19.9796	247	0.750391	1.1758	1.0768	1.54437	0.750391	1.1758	1.0768	1.54437	1.90726	1.37759	1.3608	0.444457	0.560208	0.0158784	both	0.317959	0.999545	1	2	1	1	1793	199	703	0.530396
uc007ija.2	Snrnp25	ENSMUST00000039601	17.1204	17	11.9053	7	23.2292	25	15.0453	12	37.6223	171	47.8373	220	60.0695	376	32.48	162	0.455061	0.248871	0.386706	0.463216	0.455061	0.248871	0.386706	0.463216	1.31864	1.08296	1.20739	0.271895	0.216794	1	translational_only	0.986429	0.999713	-1	2	1	2	832	207	253	0.546875
uc007ijb.2	Rhbdf1	ENSMUST00000020524	26.2099	189	29.2975	125	18.9363	148	24.3335	141	50.4181	1657	50.9518	1689	26.2886	1189	31.2647	1124	0.51985	0.575004	0.720323	0.778307	0.51985	0.575004	0.720323	0.778307	0.779532	0.567755	1.36879	0.452905	-0.722745	4.51555e-05	both	0.42365	0.999545	1	2	-1	-1	2939	149	219	0.59408
uc007ijd.2	Mpg	ENSMUST00000020528	9.72899	27	10.9535	18	8.31138	25	6.28037	14	33.771	429	32.6762	420	12.8247	225	17.2885	241	0.288087	0.335214	0.648076	0.363269	0.288087	0.335214	0.648076	0.363269	0.705512	0.45319	1.62256	0.698275	-1.05029	2.66321e-07	both	0.218617	0.999545	1	2	-1	-1	1745	36	707	0.448711
uc007ijq.1	Sh3pxd2b	ENSMUST00000038753	29.1307	223	23.3845	106	21.5738	179	15.775	97	8.71384	305	7.50248	266	6.757	327	6.39995	246	3.34303	3.1169	3.19281	2.46487	3.34303	3.1169	3.19281	2.46487	0.711202	0.81134	0.875812	-0.191308	-0.202415	0.909098	translational_only	0.308791	0.999545	-1	2	-1	2	7432	83	4622	0.511706
uc007ijr.1	Ubtd2	ENSMUST00000051053	12.5871	24	7.92432	9	10.725	22	11.0998	17	20.501	163	17.6979	144	9.49512	108	14.1188	128	0.613973	0.447755	1.12953	0.786172	0.613973	0.447755	1.12953	0.786172	1.06404	0.618183	1.80433	0.851459	-0.561557	0.0842638	translational_only	NA	NA	-1	2	-1	2	3032	105	2222	0.401055
uc007ijt.1	Stk10	ENSMUST00000102821	11.0465	90	9.12348	44	7.81645	69	8.55701	56	4.23957	158	3.92757	148	4.61261	237	4.4014	180	2.60556	2.32293	1.69458	1.94416	2.60556	2.32293	1.69458	1.94416	0.811775	1.10369	0.738307	-0.437707	0.240293	0.753567	translational_only	NA	NA	-1	2	1	2	5073	138	2034	0.53834
uc007ikh.2	Ranbp17	ENSMUST00000102815	2.28688	21	1.28736	7	1.70806	17	1.76247	13	2.4512	103	2.42255	103	2.67004	155	2.53656	117			0.639713	0.694825	0.932965	0.531405	0.639713	0.694825	0.970983	1.06829	0.911339	-0.13394	0.195223	1	translational_only	NA	NA	-1	2	1	2	5002	127	1608	0.439424
uc007ilc.2	Spdl1	ENSMUST00000093191	19.3879	99	14.8828	45	14.1013	78	8.29409	34	8.54236	199	7.31332	172	11.5946	372	7.58048	194	2.26962	2.03503	1.2162	1.09414	2.26962	2.03503	1.2162	1.09414	0.653486	1.20935	0.536708	-0.897789	0.376849	0.427663	translational_only	0.000331378	0.193672	-1	-1	1	2	2510	173	510	0.458964
uc007ild.2	Slit3	ENSMUST00000069837	7.76723	100	8.52621	65	3.36816	47	3.19105	33	9.06528	534	8.68899	518	2.56844	209	2.31949	150	0.856811	0.981266	1.31137	1.37575	0.856811	0.981266	1.31137	1.37575	0.402568	0.27531	1.46192	0.547864	-1.75911	2.03072e-23	both	0.147452	0.999545	1	2	-1	-1	4996	59	365	0.557046
uc007ilf.1	Pank3	ENSMUST00000018990	32.0469	99	25.6936	47	27.4769	92	16.12	40	8.27407	117	6.85571	98	4.87786	95	7.28223	113	3.87317	3.74777	5.63297	2.2136	3.87317	3.74777	5.63297	2.2136	0.755048	0.80372	1.02961	0.0420948	-0.230683	1	translational_only	NA	NA	-1	2	-1	2	7365	425	5827	0.356144
uc007ilh.2	Rars	ENSMUST00000018992	82.156	456	57.2016	188	91.4252	550	58.9907	263	52.5726	1335	50.8815	1306	93.7932	3281	68.9739	1922	1.56271	1.12421	0.974753	0.855261	1.56271	1.12421	0.974753	0.855261	1.07935	1.57333	0.681081	-0.554102	0.750796	0.000242581	both	0.023558	0.687058	-1	-1	1	1	2131	47	101	0.461286
uc007ili.1	Wwc1	ENSMUST00000018993	21.3552	199	20.2976	112	28.6226	289	33.6874	252	25.7885	1099	23.0499	993	24.4504	1436	24.8691	1163	0.828089	0.880594	1.17064	1.35459	0.828089	0.880594	1.17064	1.35459	1.49594	1.00985	1.47788	0.563528	0.110294	1	translational_only	0.15504	0.999545	1	2	1	2	3315	0	0	0.572851
uc007ilp.2	Mat2b	ENSMUST00000040167	35.5642	99	18.2002	30	21.5437	65	22.8088	51	43.051	548	42.5479	548	31.4954	552	30.4665	426	0.826096	0.427758	0.684028	0.748649	0.826096	0.427758	0.684028	0.748649	0.824941	0.723864	1.14262	0.192345	-0.369581	0.0993625	translational_only	0.866299	0.999545	1	2	-1	2	1857	142	710	0.457728
uc007ilt.2	Hmmr	ENSMUST00000020579	19.7346	125	12.1936	47	19.9202	137	13.7278	70	7.96356	218	6.78261	190	9.21688	345	8.59974	262	2.47812	1.79777	2.16127	1.59631	2.47812	1.79777	2.16127	1.59631	1.05387	1.20822	0.878784	-0.186419	0.366038	0.194296	translational_only	0.355352	0.999545	-1	2	1	2	3914	78	1451	0.28513
uc007ilz.1	Ccng1	ENSMUST00000020576	62.5966	153	43.5288	63	10.5693	28	9.16822	18	95.411	1065	91.8348	1036	15.3736	237	15.6385	192	0.656074	0.47399	0.687498	0.586258	0.656074	0.47399	0.687498	0.586258	0.185983	0.165623	1.12715	0.172686	-2.49381	1.13237e-49	both	0.841459	0.999545	1	2	-1	-1	3487	286	2316	0.377975
uc007imq.1	Slu7	ENSMUST00000020681	15.0593	74	8.24823	24	11.2656	60	8.86737	35	5.96432	134	5.41386	123	7.15876	222	4.6213	114	2.5249	1.52354	1.57368	1.91881	2.5249	1.52354	1.57368	1.91881	0.863796	1.03532	0.862674	-0.213113	0.156773	1	translational_only	NA	NA	-1	2	1	2	3653	105	1790	0.397482
uc007imu.2	Pwwp2a	ENSMUST00000061070	6.67878	41	6.87115	25	7.06383	47	6.07838	30	2.8127	79	2.2851	65	3.53179	137	2.10602	65			2.00007		2.37451	3.00694	2.00007	2.88619	0.96991	1.10593	0.907983	-0.139264	0.255697	1	translational_only	NA	NA	-1	2	1	2	3279	95	991	0.488869
uc007imx.1	Ttc1	ENSMUST00000109278	18.5395	45	16.6983	24	19.0057	50	10.7711	21	10.2606	114	9.7849	110	24.96	383	10.4986	128	1.80686	1.70654	0.761447	1.02595	1.80686	1.70654	0.761447	1.02595	0.845023	1.76891	0.508737	-0.975008	0.925901	0.0409738	both	NA	NA	-1	2	1	1	1432	85	468	0.46648
uc007inh.2	Rnf145	ENSMUST00000019333	32.2819	180	26.653	88	28.7915	174	32.8214	147	30.2081	771	35.9528	928	28.412	1001	25.7429	721	1.06865	0.741332	1.01336	1.27497	1.06865	0.741332	1.01336	1.27497	1.04544	0.818533	1.26428	0.338318	-0.189775	0.90872	translational_only	0.504629	0.999545	1	2	-1	2	3570	343	1235	0.514286
uc007inq.1	Clint1	ENSMUST00000109260	67.4127	353	49.344	153	61.3162	348	48.501	204	35.5651	852	31.8009	770	32.008	1059	26.4662	695	1.89547	1.55165	1.91565	1.83256	1.89547	1.55165	1.91565	1.83256	0.940564	0.868007	1.08734	0.120809	-0.105379	1	translational_only	0.835957	0.999545	1	2	-1	2	3398	188	1338	0.469688
uc007ins.1	Lsm11	ENSMUST00000129820	17.9233	54	10.0896	18	13.168	43	15.7022	38	17.4027	240	18.4893	258	10.9731	209	12.0923	183	1.02991	0.545697	1.20003	1.29852	1.02991	0.545697	1.20003	1.29852	1.03061	0.642634	1.58577	0.665183	-0.542727	0.014182	both	0.0716178	0.933977	1	2	-1	-1	6453	23	5344	0.474198
uc007ioz.1	Sgcd	ENSMUST00000077221	23.316	56	16.1722	23	11.1402	29	11.4036	22	27.1059	298	28.4972	317	14.9504	227	14.4228	174	0.860179	0.567502	0.745144	0.790663	0.860179	0.567502	0.745144	0.790663	0.570899	0.528265	1.07574	0.105323	-0.821396	1.6698e-05	both	0.945039	0.999545	-1	2	-1	-1	1399	49	480	0.436741
uc007ipa.1	Rack1	ENSMUST00000020640	1656.48	3777	1128.81	1560	1676.01	4142	1297.85	2436	4665.55	42472	4785.08	44514	3807.28	47118	4421.14	44605	0.355044	0.235902	0.440213	0.293555	0.355044	0.235902	0.440213	0.293555	1.0677	0.870673	1.24168	0.312299	-0.112261	1	translational_only	0.798383	0.999545	1	2	-1	2	1254	104	196	0.523126
uc007ipc.1	Trim41	ENSMUST00000047145	11.3297	60	14.3501	45	8.53675	49	10.3547	44	12.2217	295	11.4872	281	12.5193	416	9.85379	261	0.927015	1.24923	0.681885	1.05083	0.927015	1.24923	0.681885	1.05083	0.735653	0.943661	0.796196	-0.328805	0.0142083	1	translational_only	0.109501	0.999545	-1	2	1	2	3470	736	841	0.563112
uc007ipg.1	Irgm1	ENSMUST00000049519	8.78592	30	3.46211	7	19.5033	72	13.1257	36	7.14328	111	6.79407	107	11.5285	247	15.9779	272	1.22996		1.69174	0.821487	1.22996	0.509577	1.69174	0.821487	2.66402	1.97358	1.44477	0.530842	1.06823	6.91088e-06	both	NA	NA	-1	2	1	1	2227	445	552	0.417153
uc007ipx.1	Zfp62	ENSMUST00000109197	4.42835	34	3.50641	16	4.56138	38	4.36839	27	4.11443	143	4.07353	144	3.49734	168	2.8505	109	1.0763	0.860778	1.30424	1.5325	1.0763	0.860778	1.30424	1.5325	1.1254	0.775265	1.46445	0.550354	-0.263847	0.711842	translational_only	NA	NA	-1	2	-1	2	3927	173	1009	0.203463
uc007iqd.1	Mgat1	ENSMUST00000109194	69.4683	260	64.9759	144	56.4518	229	56.5478	170	70.3265	1203	77.8232	1348	44.8257	1059	54.031	1015	0.987798	0.834916	1.25936	1.04658	0.987798	0.834916	1.25936	1.04658	0.840495	0.667276	1.26511	0.339268	-0.486993	0.0180301	both	0.454738	0.999545	1	2	-1	-1	2509	176	989	0.563173
uc007irg.2	Mapk9	ENSMUST00000164643	18.113	64	12.407	26	8.60318	33	8.0909	23	13.7371	222	12.588	206	8.00724	178	7.88182	140	1.31855	0.985621	1.07442	1.02653	1.31855	0.985621	1.07442	1.02653	0.546989	0.603572	0.911804	-0.133204	-0.632383	0.00356431	both	NA	NA	-1	2	-1	-1	4677	273	3132	0.445585
uc007iry.2	Mgat4b	ENSMUST00000041725	32.1747	148	30.8396	84	29.4849	147	41.9505	155	67.7142	1424	65.8291	1399	59.885	1735	73.2803	1689	0.475154	0.468479	0.492358	0.572467	0.475154	0.468479	0.492358	0.572467	1.13364	0.99717	1.12843	0.174317	0.0906651	1	translational_only	0.879407	0.999545	-1	2	1	2	2429	308	474	0.543434
uc007isd.2	Maml1	ENSMUST00000059458	21.265	183	21.3973	109	18.0116	168	18.5173	128	11.0321	434	11.2977	450	7.63323	415	8.0764	349	1.92756	1.89396	2.35963	2.29276	1.92756	1.89396	2.35963	2.29276	0.856233	0.703528	1.21742	0.28383	-0.409863	0.0627578	translational_only	0.363607	0.999545	1	2	-1	2	5552	275	2214	0.533862
uc007ish.2	Canx	ENSMUST00000179865	324.115	1589	207.966	610	370.176	1967	289.935	1149	95.8166	2113	93.6255	2094	212.809	6333	130.431	3123	3.38266	2.22126	1.73947	2.2229	3.38266	2.22126	1.73947	2.2229	1.24062	1.81185	0.707072	-0.500071	0.927592	0.00011621	both	0.019619	0.643241	-1	-1	1	1	4253	152	2325	0.401129
uc007isk.1	Hnrnph1	ENSMUST00000069304	104.237	340	82.8853	173	127.456	442	99.6326	271	32.2843	426	34.8459	473	70.7583	1106	41.6898	593	3.22873	2.37862	1.80129	2.38986	3.22873	2.37862	1.80129	2.38986	1.21359	1.67507	0.747439	-0.419972	0.6863	0.00510613	both	0.0931338	0.95901	-1	2	1	1	2226	124	752	0.43531
uc007isn.1	Rufy1	ENSMUST00000020643	11.1821	67	7.8919	28	10.009	65	6.02558	29	5.35978	147	4.61248	128	6.94654	263	3.72135	112	2.08629	1.71099	1.44086	1.61919	2.08629	1.71099	1.44086	1.61919	0.840651	1.06976	0.805853	-0.311412	0.202411	1	translational_only	NA	NA	-1	2	1	2	2657	6	512	0.499435
uc007itz.1	Hnrnpab	ENSMUST00000074669	490.974	1357	326.895	535	478.203	1434	411.697	914	294.424	3702	274.162	3488	437.291	7539	275.393	3792	1.66757	1.19234	1.09356	1.49494	1.66757	1.19234	1.09356	1.49494	1.08807	1.25343	0.905097	-0.143856	0.416382	0.217305	translational_only	0.344673	0.999545	-1	2	1	2	2545	238	1308	0.462083
uc007iuc.1	Nhp2	ENSMUST00000127405	98.4839	112	44.7375	32	75.0119	92	63.6253	60	238.134	811	231.858	802	271.134	1188	261.115	961	0.413565	0.192952	0.27666	0.243667	0.413565	0.192952	0.27666	0.243667	0.967992	1.13247	0.857892	-0.221132	0.211717	0.640137	translational_only	0.369553	0.999545	-1	2	1	2	1004	45	497	0.538845
uc007iud.1	Rmnd5b	ENSMUST00000001081	24.3574	80	17.4822	34	11.2365	40	10.6133	28	32.1936	484	30.3054	461	18.2208	378	19.5954	323	0.756592	0.576868	0.616683	0.541625	0.756592	0.576868	0.616683	0.541625	0.522228	0.605069	0.868649	-0.203155	-0.629842	0.000963451	both	0.314161	0.999545	-1	2	-1	-1	1946	354	410	0.569887
uc007iuh.1	0610009B22Rik	ENSMUST00000007921	12.497	14	11.9393	8	16.5974	20	12.0719	11	29.3883	137	31.2035	148	19.297	127	23.1442	123	0.425238	0.382627	0.860102	0.521594	0.425238	0.382627	0.860102	0.521594	1.17322	0.700445	1.71031	0.774254	-0.382422	0.277787	translational_only	NA	NA	-1	2	-1	2	795	110	262	0.405031
uc007iui.1	Sec24a	ENSMUST00000109097	21.0875	194	22.7625	124	15.8456	158	15.021	111	8.62009	363	8.52198	363	5.43506	316	5.45329	252	2.44632	2.67104	2.91544	2.75448	2.44632	2.67104	2.91544	2.75448	0.703914	0.635183	1.10798	0.147932	-0.556999	0.00535803	both	0.650942	0.999545	1	2	-1	-1	6798	661	2864	0.429538
uc007iup.2	Sar1b	ENSMUST00000020653	68.1199	111	52.8563	51	78.1374	138	82.514	108	110.789	812	109.57	814	102.529	1025	118.491	953	0.614863	0.482397	0.762102	0.696374	0.614863	0.482397	0.762102	0.696374	1.32796	1.003	1.3292	0.410556	0.0910188	1	translational_only	0.474844	0.999545	1	2	1	2	1253	146	510	0.435754
uc007iuq.1	Jade2	ENSMUST00000020655	7.31649	51	10.4009	43	12.6861	96	10.1679	57	5.05208	161	5.34722	172	5.75302	253	6.60379	230	1.44821	1.94511	2.20512	1.53971	1.44821	1.94511	2.20512	1.53971	1.28992	1.18824	1.10359	0.1422	0.341075	0.285144	translational_only	0.726196	0.999545	1	2	1	2	6100	171	3439	0.545246
uc007ius.2	Cdkn2aipnl	ENSMUST00000102763	48.2027	45	36.1797	20	26.6841	27	37.3397	28	52.7388	224	48.5687	210	27.7874	163	33.5825	157	0.91399	0.74492	0.960294	1.11188	0.91399	0.74492	0.960294	1.11188	0.758733	0.605778	1.24912	0.32091	-0.632957	0.00601887	both	0.572244	0.999545	1	2	-1	-1	1864	88	1425	0.478541
uc007iut.2	Ube2b	ENSMUST00000020657	91.8574	112	33.0119	24	61.9059	82	55.0093	54	103.031	531	94.9281	500	88.3498	602	101.977	555	0.891552	0.347757	0.700692	0.539428	0.891552	0.347757	0.700692	0.539428	0.936301	0.961446	1.00065	0.000943353	-0.0270402	1	translational_only	0.978049	0.999713	-1	2	-1	2	2125	130	1536	0.382118
uc007ivb.1	Ppp2ca	ENSMUST00000020608	198.787	505	114.903	174	169.23	467	137.28	282	217.307	2420	227.376	2574	177.383	2706	174.74	2123	0.914777	0.505341	0.954034	0.785624	0.914777	0.505341	0.954034	0.785624	0.977111	0.791852	1.22501	0.292792	-0.252388	0.36375	translational_only	0.518367	0.999545	1	2	-1	2	1930	225	775	0.476684
uc007ivf.2	Skp1a	ENSMUST00000037324	129.092	149	54.633	41	116.814	149	78.91	78	158.586	575	135.334	516	156.378	674	163.174	633	0.814017	0.40369	0.746996	0.483595	0.814017	0.40369	0.746996	0.483595	1.06531	1.08721	1.01058	0.0151849	0.0684378	1	translational_only	0.752901	0.999545	1	2	1	2	1454	124	838	0.406465
uc007ivm.2	Vdac1	ENSMUST00000102758	101.502	172	55.0161	67	60.6892	115	41.9426	65	88.3189	406	83.1663	401	53.7352	345	66.2992	358	1.14927	0.661519	1.12941	0.632626	1.14927	0.661519	1.12941	0.632626	0.655718	0.699969	0.97308	-0.0393701	-0.384644	0.175314	translational_only	0.576697	0.999545	-1	2	-1	2	2020	294	874	0.464851
uc007ivo.1	9530068E07Rik	ENSMUST00000036952	214.7	461	145.505	185	186.488	434	165.825	286	134.148	1315	145.697	1447	85.95	1159	97.9836	1054	1.60047	0.998687	2.16972	1.69238	1.60047	0.998687	2.16972	1.69238	0.978088	0.657269	1.48591	0.571344	-0.512177	0.00732939	both	0.0443054	0.892899	1	1	-1	-1	2467	40	1647	0.399676
uc007ivq.1	Hspa4	ENSMUST00000020630	131.162	928	78.6108	330	139.363	1067	113.494	645	41.3328	1337	38.8343	1269	64.6731	2858	50.2223	1777	3.17331	2.02426	2.15489	2.25983	3.17331	2.02426	2.15489	2.25983	1.20539	1.4332	0.849381	-0.235516	0.607734	0.00265693	both	0.257902	0.999545	-1	2	1	1	4640	313	1798	0.466164
uc007ivt.1	Zcchc10	ENSMUST00000018383	5.59979	8	2.33646	2	5.1871	8	3.45157	4	9.16512	54	8.36866	50	16.94	123	12.9226	83			0.306204		0.610989	0.279192	0.306204	0.267096	1.08851	1.70314	0.644027	-0.634807	0.77455	0.0064133	both	NA	NA	-1	2	1	1	1257	12	708	0.310263
uc007ivu.2	Aff4	ENSMUST00000060945	32.0702	314	25.5202	148	23.6455	251	31.6518	249	14.7212	659	13.9891	634	13.401	829	13.2077	649	2.17851	1.82429	1.76446	2.39646	2.17851	1.82429	1.76446	2.39646	0.960184	0.926804	1.0395	0.0558915	-0.0118159	1	translational_only	0.881393	0.999545	-1	2	-1	2	10165	367	6315	0.422725
uc007ivy.2	Uqcrq	ENSMUST00000061326	191.015	87	91.6136	31	115.789	60	104.228	45	684.403	709	615.067	685	435.554	592	551.117	650	0.279097	0.148949	0.265843	0.189122	0.279097	0.148949	0.265843	0.189122	0.778468	0.759287	1.06289	0.0879899	-0.346453	0.28896	translational_only	0.952736	0.999545	-1	2	-1	2	499	142	108	0.579158
uc007iwj.2	42621	ENSMUST00000117061	85.3833	300	57.9394	122	38.5699	147	30.0846	86	40.1468	641	41.4781	669	17.1133	374	17.6932	310	2.12678	1.39687	2.25379	1.70034	2.12678	1.39687	2.25379	1.70034	0.47902	0.426421	1.12217	0.166295	-1.13764	1.4655e-11	both	0.621161	0.999545	1	2	-1	-1	4627	274	3060	0.476118
uc007iwt.1	Rad50	ENSMUST00000020649	9.65367	107	6.24696	41	9.323	112	8.08713	72	3.48871	177	3.0973	159	3.82574	268	3.37677	188	2.76712	2.01691	2.43692	2.39493	2.76712	2.01691	2.43692	2.39493	1.09493	1.09361	1.01	0.0143496	0.22945	0.858715	translational_only	0.948135	0.999545	-1	2	1	2	5153	264	950	0.446342
uc007iww.2	Irf1	ENSMUST00000108920	15.3214	42	11.7052	19	7.40459	22	8.62892	19	15.4768	194	15.9891	203	10.9062	189	9.29598	128	0.989957	0.732076	0.678937	0.928242	0.989957	0.732076	0.678937	0.928242	0.593249	0.642033	0.933303	-0.0995824	-0.535206	0.0249717	both	NA	NA	-1	2	-1	-1	2138	270	878	0.515903
uc007ixk.2	P4ha2	ENSMUST00000019050	41.2734	186	32.2279	86	56.7109	277	51.936	188	49.686	1023	45.1409	941	87.9633	2495	51.6425	1169	0.830684	0.71394	0.644711	1.00568	0.830684	0.71394	0.644711	1.00568	1.47816	1.47222	1.06848	0.0955542	0.654963	0.0243597	both	0.709911	0.999545	-1	2	1	1	2284	263	407	0.512259
uc007ixx.2	Fnip1	ENSMUST00000046835	10.5731	104	5.83746	34	8.3481	89	8.60658	68	4.69174	211	4.37068	199	4.48935	279	4.41225	218	2.25356	1.33559	1.85953	1.95061	2.25356	1.33559	1.85953	1.95061	1.03316	0.982255	1.06157	0.0862031	0.0729807	1	translational_only	0.870272	0.999545	1	2	1	2	6281	118	2665	0.383378
uc007iyj.1	Hint1	ENSMUST00000020504	256.544	217	116.223	66	214.881	197	145.281	103	758.847	2152	668.922	1972	661.936	2486	769.892	2374	0.338071	0.173747	0.324625	0.188703	0.338071	0.173747	0.324625	0.188703	0.966184	1.00284	1.00295	0.00424911	0.0472731	1	translational_only	0.599837	0.999545	-1	2	1	2	576	52	143	0.505208
uc007iyr.2	Anxa6	ENSMUST00000108883	219.406	1242	159.012	533	97.4667	598	73.8956	336	163.279	4216	163.226	4273	82.8641	2955	73.1194	2077	1.34374	0.974185	1.17622	1.01062	1.34374	0.974185	1.17622	1.01062	0.452839	0.477737	0.943446	-0.083988	-0.967328	1.7691e-09	both	0.523298	0.999545	-1	2	-1	-1	2661	139	500	0.535137
uc007iyw.2	Gm2a	ENSMUST00000000608	47.2576	75	36.1797	34	52.9031	91	51.7735	66	25.2359	183	31.971	235	23.3231	234	26.8448	214	1.87263	1.13164	2.26827	1.92863	1.87263	1.13164	2.26827	1.92863	1.25455	0.876956	1.39697	0.482303	-0.0933855	1	translational_only	0.0937782	0.959676	1	2	-1	2	4256	179	3495	0.384868
uc007izj.1	Atox1	ENSMUST00000108857	148.236	78	77.0278	24	85.9182	49	82.8098	35	266.965	643	271.641	662	182.778	608	236.092	624	0.555266	0.283565	0.470068	0.350753	0.555266	0.283565	0.470068	0.350753	0.749023	0.777692	0.97853	-0.0313113	-0.267711	0.524671	translational_only	0.591551	0.999545	-1	2	-1	2	438	45	186	0.573059
uc007izt.2	Fam114a2	ENSMUST00000020831	25.6776	107	11.3476	28	14.3917	65	11.3529	38	15.0144	286	13.1179	253	14.6926	386	10.58	221	1.71019	0.86505	0.97952	1.07306	1.71019	0.86505	0.97952	1.07306	0.695327	0.898347	0.797043	-0.32727	-0.0541494	1	translational_only	0.177578	0.999545	-1	2	-1	2	2608	86	1028	0.483896
uc007izy.1	Mfap3	ENSMUST00000108849	11.6798	34	18.5645	32	18.7181	59	12.8427	30	6.60425	88	7.35725	99	7.09175	130	9.03628	132		2.5233	2.63942	1.42123	1.76853	2.5233	2.63942	1.42123	1.04352	1.15518	0.946134	-0.0798838	0.295518	0.663033	translational_only	NA	NA	-1	2	1	2	4828	205	3573	0.415079
uc007jab.1	Galnt10	ENSMUST00000066987	38.9904	197	38.7944	116	26.631	146	24.8172	101	44.4838	1019	46.5021	1076	23.4139	742	27.4048	692	0.876508	0.834251	1.1374	0.905576	0.876508	0.834251	1.1374	0.905576	0.661417	0.558534	1.19419	0.256036	-0.738231	3.80944e-05	both	0.67694	0.999545	1	2	-1	-1	4701	117	2772	0.560306
uc007jae.1	Sap30l	ENSMUST00000020826	25.1519	37	21.4817	19	20.0701	32	26.8748	32	77.067	489	80.0377	517	61.5883	532	71.387	493	0.326364	0.268395	0.325875	0.376466	0.326364	0.268395	0.325875	0.376466	1.00667	0.846412	1.18088	0.239864	-0.165382	1	translational_only	0.955599	0.999545	-1	2	-1	2	1549	455	545	0.49193
uc007jah.2	Larp1	ENSMUST00000178636	31.6519	262	25.407	129	30.0791	267	28.7494	192	14.8164	495	14.8929	497	16.8933	684	15.9298	553	2.13628	1.70598	1.78054	1.80475	2.13628	1.70598	1.78054	1.80475	1.03101	1.10481	0.933119	-0.0998675	0.116247	1	translational_only	0.834692	0.999545	-1	2	1	2	6615	129	3267	0.510506
uc007jal.2	Gemin5	ENSMUST00000172035	21.8863	278	14.8876	112	26.5065	365	24.3179	248	13.3496	776	13.3866	787	15.0106	1204	15.0285	958	1.63947	1.11213	1.76585	1.61812	1.63947	1.11213	1.76585	1.61812	1.38208	1.12354	1.22982	0.298446	0.264806	0.349089	translational_only	0.381432	0.999545	1	2	1	2	6214	86	1616	0.504828
uc007jax.1	Zfp692	ENSMUST00000153510	3.59098	16	3.41123	9	4.34851	21	4.4706	16	10.934	223	10.2378	211	11.6595	328	15.6137	349	0.328422	0.333201	0.37296	0.286326	0.328422	0.333201	0.37296	0.286326	1.25948	1.28818	0.996466	-0.00510721	0.457103	0.0986679	translational_only	0.445055	0.999545	-1	2	1	2	1949	262	91	0.571062
uc007jbe.3	Sh3bp5l	ENSMUST00000116376	7.93666	26	8.24823	16	11.2656	40	11.0209	29	14.0712	211	13.391	203	13.4836	279	12.358	203	0.564038	0.615953	0.835505	0.891803	0.564038	0.615953	0.835505	0.891803	1.37699	0.940986	1.46383	0.54975	0.0108944	1	translational_only	0.298156	0.999545	1	2	1	2	3033	523	1331	0.575008
uc007jcq.1	Rnf187	ENSMUST00000094151	155.39	302	125.128	144	157.61	332	129.396	202	128.52	1140	124.871	1124	85.2205	1044	99.3628	970	1.20907	1.00206	1.84944	1.30226	1.20907	1.00206	1.84944	1.30226	1.02313	0.728454	1.42537	0.51134	-0.360625	0.117205	translational_only	0.124889	0.999545	1	2	-1	2	1939	125	1106	0.569366
uc007jdl.1	2310033P09Rik	ENSMUST00000020719	10.6695	23	5.48394	7	2.99602	7	0.577526	1	10.8581	107	10.3165	103	1.39422	19	1.29465	14	0.982632				0.982632	0.531569	2.14888	0.446087	0.221225	0.126986	1.71376	0.777161	-2.86396	1.10628e-23	both	NA	NA	-1	2	-1	-1	1241	68	390	0.558421
uc007jds.1	Snap47	ENSMUST00000010038	44.5839	154	26.8903	55	46.7439	175	42.5298	118	56.2727	889	57.5073	920	48.72	1063	57.0486	989	0.792283	0.467599	0.959439	0.7455	0.792283	0.467599	0.959439	0.7455	1.24903	0.929589	1.35325	0.436431	-0.00951309	1	translational_only	0.352501	0.999545	1	2	-1	2	1837	81	514	0.523136
uc007jdu.2	Jmjd4	ENSMUST00000147163	7.27685	26	8.03517	17	5.68096	22	8.36247	24	8.62128	141	8.21838	136	6.24237	141	7.41653	133	0.844056	0.977707	0.910064	1.12754	0.844056	0.977707	0.910064	1.12754	0.917151	0.811115	1.11848	0.161541	-0.2108	1	translational_only	NA	NA	-1	2	-1	2	4445	200	2961	0.424747
uc007jeb.2	Zkscan17	ENSMUST00000013262	16.1046	79	11.0167	32	17.7208	94	19.7843	78	14.6414	328	15.3438	348	12.3788	381	16.0494	395	1.09994	0.717988	1.43155	1.23272	1.09994	0.717988	1.43155	1.23272	1.38287	0.948072	1.46555	0.551446	0.0140831	1	translational_only	0.126905	0.999545	1	2	1	2	4059	756	1545	0.517615
uc007jem.2	Mprip	ENSMUST00000066330	25.325	405	25.8237	248	29.0042	503	30.366	392	28.0516	1951	24.7697	1735	25.4737	2420	20.5649	1571	0.902799	1.04255	1.1386	1.4766	0.902799	1.04255	1.1386	1.4766	1.16074	0.871589	1.34433	0.426887	-0.105377	1	translational_only	0.311758	0.999545	1	2	-1	2	6187	331	0	0.539842
uc007jfa.1	Cops3	ENSMUST00000019517	66.1198	234	41.5156	87	58.658	225	43.6554	124	103.441	1669	109.686	1795	102.251	2284	113.793	2018	0.639201	0.378494	0.573667	0.383639	0.639201	0.378494	0.573667	0.383639	0.950555	1.01368	0.940661	-0.0882527	0.117993	1	translational_only	0.459621	0.999545	-1	2	1	2	1566	43	251	0.44189
uc007jfd.1	Nt5m	ENSMUST00000102695	8.28485	15	5.58782	6	8.64954	17	3.42737	5	21.5397	176	18.356	152	7.74629	87	9.21293	83	0.384632	0.304415			0.384632	0.304415	1.11661	0.372018	0.870555	0.425089	2.16041	1.11131	-1.14373	5.63347e-07	both	NA	NA	-1	2	-1	-1	1306	57	586	0.57657
uc007jfg.1	Med9	ENSMUST00000081980	49.6275	57	45.3577	31	29.5763	37	19.4151	18	70.5509	370	56.7717	302	42.5958	307	50.6898	291	0.703428	0.798949	0.694347	0.383017	0.703428	0.798949	0.694347	0.383017	0.515779	0.732671	0.717107	-0.479741	-0.3615	0.260063	translational_only	0.0730095	0.93535	-1	2	-1	2	3013	53	2531	0.491537
uc007jfm.1	Rai1	ENSMUST00000171108	13.5812	217	16.277	154	15.7036	272	16.2818	209	8.20666	600	8.63948	639	6.40339	646	7.20309	578	1.6549	1.88403	2.45239	2.26039	1.6549	1.88403	2.45239	2.26039	1.07124	0.807692	1.33169	0.413263	-0.212146	0.716402	translational_only	0.142346	0.999545	1	2	-1	2	7125	305	1150	0.596912
uc007jfn.2	Srebf1	ENSMUST00000020846	20.5783	197	21.169	120	33.4427	347	33.4218	257	26.6315	1167	27.8253	1233	33.8172	2046	38.5765	1855	0.772703	0.760782	0.988926	0.866377	0.772703	0.760782	0.988926	0.866377	1.60165	1.32938	1.20986	0.274841	0.508037	0.00660331	both	0.687149	0.999545	1	2	1	1	4327	84	838	0.58447
uc007jfq.1	Tom1l2	ENSMUST00000102683	17.462	74	10.3405	26	11.9824	55	12.9003	44	5.78926	112	6.61459	130	5.52807	148	5.89195	125	3.01627	1.56329	2.16755	2.18947	3.01627	1.56329	2.16755	2.18947	0.894979	0.920683	0.951407	-0.0718647	-0.0258639	1	translational_only	NA	NA	-1	2	-1	2	5000	97	3379	0.5518
uc007jfv.2	Atpaf2	ENSMUST00000108721	17.755	44	14.9923	22	13.403	36	15.0711	30	25.8297	293	24.0467	276	19.0216	298	22.9758	286	0.687389	0.623465	0.704619	0.655953	0.687389	0.623465	0.704619	0.655953	0.869506	0.842028	1.03793	0.0537072	-0.154365	1	translational_only	0.733052	0.999545	-1	2	-1	2	1863	189	777	0.487386
uc007jfw.2	Gid4	ENSMUST00000070681	16.1945	29	6.60152	7	10.8198	21	7.64743	11	16.8357	138	17.9653	149	9.01012	102	7.78221	70	0.961914	0.36746			0.961914	0.36746	1.20085	0.982681	0.810106	0.482525	1.64252	0.715913	-0.945732	2.99976e-05	both	NA	NA	-1	2	-1	-1	4400	511	3235	0.451591
uc007jfy.1	Drg2	ENSMUST00000018568	9.19066	26	6.28987	11	10.3589	31	11.7295	27	15.2742	161	15.5741	171	12.8355	174	17.7471	202	0.601713	0.403867	0.807049	0.660927	0.601713	0.403867	0.807049	0.660927	1.42685	0.99139	1.45983	0.545801	-0.00034441	1	translational_only	0.211164	0.999545	1	2	-1	2	1713	63	555	0.542323
uc007jgd.2	Alkbh5	ENSMUST00000044250	43.9208	145	34.2731	67	32.4182	116	37.7099	100	20.0506	303	19.5547	299	12.4097	259	16.3421	271	2.1905	1.75268	2.61232	2.30754	2.1905	1.75268	2.61232	2.30754	0.896849	0.725959	1.24769	0.319258	-0.369809	0.242617	translational_only	0.272418	0.999545	1	2	-1	2	6025	740	4097	0.449461
uc007jge.2	Llgl1	ENSMUST00000052346	21.6466	194	22.6123	120	15.0304	146	16.9473	122	16.8166	689	17.5924	730	8.72744	494	10.8832	489	1.28722	1.28535	1.7222	1.5572	1.28722	1.28535	1.7222	1.5572	0.722514	0.569927	1.27476	0.350227	-0.717181	0.000207021	both	0.33555	0.999545	1	2	-1	-1	4338	171	978	0.578608
uc007jgj.1	Mief2	ENSMUST00000018743	7.89033	30	7.10673	16	8.97852	37	9.49566	29	7.5271	131	7.95615	140	6.69824	161	7.54001	144	1.04826	0.893238	1.34043	1.25937	1.04826	0.893238	1.34043	1.25937	1.23185	0.91959	1.33907	0.421233	-0.0266799	1	translational_only	NA	NA	-1	2	-1	2	2522	176	981	0.574544
uc007jgl.1	Top3a	ENSMUST00000002891	5.43644	46	5.98762	30	5.452	50	6.32672	43	5.18962	201	5.18347	203	5.68508	304	5.15272	219	1.04756	1.15514	0.959002	1.22784	1.04756	1.15514	0.959002	1.22784	1.03104	1.0448	0.992802	-0.0104214	0.163444	1	translational_only	0.599575	0.999545	-1	2	1	2	3740	264	464	0.535027
uc007jgn.1	Smcr8	ENSMUST00000056907	16.3616	129	14.5654	68	9.71278	83	11.369	72	5.93183	214	6.35334	232	4.17311	208	4.92563	195	2.75827	2.29255	2.32746	2.30813	2.75827	2.29255	2.32746	2.30813	0.681663	0.740629	0.917789	-0.123766	-0.339807	0.300621	translational_only	0.451099	0.999545	-1	2	-1	2	7391	503	4080	0.464349
uc007jgo.1	Shmt1	ENSMUST00000018744	20.7199	83	16.0203	38	21.1898	92	17.7149	57	26.6706	488	29.5249	547	28.3343	715	24.8201	498	0.776881	0.542602	0.747849	0.713731	0.776881	0.542602	0.747849	0.713731	1.05891	0.945883	1.10769	0.147557	0.0171653	1	translational_only	0.972704	0.999713	-1	2	1	2	2065	381	247	0.497821
uc007jgr.2	Dhrs7b	ENSMUST00000042281	27.8775	75	19.4595	31	29.4931	86	18.0472	39	50.7244	624	54.3324	677	47.7344	811	56.0915	758	0.549588	0.358156	0.617858	0.321746	0.549588	0.358156	0.617858	0.321746	1.0043	0.988284	1.0351	0.0497692	0.0792617	1	translational_only	0.649704	0.999545	-1	2	1	2	1553	81	500	0.476497
uc007jgs.2	Tmem11	ENSMUST00000062677	50.4981	76	32.8003	30	31.8184	52	34.4193	42	66.5899	407	68.8997	427	55.6721	457	49.4791	341	0.758345	0.476059	0.571532	0.695633	0.758345	0.476059	0.571532	0.695633	0.795185	0.776083	1.02654	0.0377906	-0.270646	0.404619	translational_only	0.707857	0.999545	-1	2	-1	2	1223	270	380	0.562551
uc007jgx.1	Map2k3	ENSMUST00000019076	72.1702	196	49.2467	82	60.2358	181	43.3507	99	117.775	1124	109.466	1080	53.7484	744	72.3382	810	0.612778	0.449881	1.1207	0.599278	0.612778	0.449881	1.1207	0.599278	0.853147	0.554857	1.61856	0.69471	-0.684221	0.00136268	both	0.105366	0.99556	1	2	-1	-1	2166	166	956	0.54109
uc007jhc.2	Usp22	ENSMUST00000041683	72.8769	321	46.7757	122	54.1117	258	44.4606	157	21.3206	426	22.689	459	14.9806	415	17.4461	385	3.41814	2.0616	3.61211	2.54846	3.41814	2.0616	3.61211	2.54846	0.823821	0.73681	1.12424	0.168955	-0.338237	0.213741	translational_only	0.464772	0.999545	1	2	-1	2	4442	174	2690	0.493471
uc007jhu.1	B9d1	ENSMUST00000102657	21.4234	36	9.04494	9	4.94149	9	5.92693	8	27.8217	214	29.8093	232	14.6849	156	19.5482	165	0.770027	0.303426	0.336501	0.303196	0.770027	0.303426	0.336501	0.303196	0.356712	0.594005	0.595924	-0.746799	-0.661357	0.00611968	both	0.060327	0.929969	-1	2	-1	-1	785	37	133	0.547771
uc007jhx.2	Epn2	ENSMUST00000179936	13.0095	70	10.6713	34	11.4886	67	11.8001	51	8.13319	200	8.19459	204	5.88277	200	7.25957	196	1.59956	1.30224	1.95292	1.62546	1.59956	1.30224	1.95292	1.62546	0.983442	0.804907	1.23316	0.302359	-0.220234	0.908125	translational_only	0.406361	0.999545	1	2	-1	2	4453	361	2169	0.48574
uc007jih.2	Ulk2	ENSMUST00000004920	8.91431	78	11.9663	62	4.74652	45	5.9758	42	14.1362	566	13.8229	560	4.97149	275	5.82464	256	0.630602	0.865689	0.954748	1.02595	0.630602	0.865689	0.954748	1.02595	0.513505	0.38614	1.32374	0.40462	-1.27799	6.98249e-13	both	0.382149	0.999545	1	2	-1	-1	5813	516	2183	0.467057
uc007jiw.2	Ncor1	ENSMUST00000101066	20.4829	423	19.4122	238	14.8773	333	16.1429	268	16.9048	1547	16.4678	1530	11.5598	1461	12.2488	1237	1.21166	1.1788	1.28699	1.31792	1.21166	1.1788	1.28699	1.31792	0.777545	0.713415	1.08971	0.123947	-0.388311	0.0526425	translational_only	0.960406	0.999545	1	2	-1	2	8852	70	1417	0.469837
uc007jjf.2	Cenpv	ENSMUST00000018653	6.22673	13	8.89786	11	1.32577	3	1.78892	3	12.1548	116	13.3409	129	10.6831	141	10.2986	108	0.512287	0.666963	0.1241		0.512287	0.666963	0.1241	0.173706	0.205935	0.82295	0.252538	-1.98543	-0.180819	1	translational_only	NA	NA	-1	2	-1	2	1034	56	219	0.582205
uc007jjr.1	Mmgt2	ENSMUST00000129162	15.1063	15	5.10227	3	21.3709	23	22.5679	18	19.4165	88	22.3965	103	17.0455	107	21.7152	108			1.25375		0.778013	0.227815	1.25375	1.03927	2.17427	0.927002	2.27974	1.18887	-0.0209396	1	translational_only	NA	NA	-1	2	-1	2	1883	351	1160	0.311206
uc007jka.1	Trim16	ENSMUST00000055006	26.1366	122	20.6225	57	21.7426	110	20.0034	75	23.261	497	18.8724	408	16.3342	482	15.6196	366	1.12362	1.09273	1.33111	1.28066	1.12362	1.09273	1.33111	1.28066	0.892789	0.758395	1.17841	0.236841	-0.301626	0.37107	translational_only	0.658861	0.999545	1	2	-1	2	3896	252	1973	0.435575
uc007jkh.1	Tvp23b	ENSMUST00000014321	25.4605	43	15.9991	16	13.1111	24	14.0057	19	14.9007	115	15.7511	123	17.5735	187	7.07271	60	1.70868	1.01575	0.746072		1.70868	1.01575	0.746072	1.98025	0.654054	0.804071	1.0007	0.00100521	-0.206124	1	translational_only	NA	NA	-1	2	-1	2	1748	94	1036	0.418764
uc007jko.2	Cox10	ENSMUST00000049091	9.4371	35	6.83027	15	10.4484	42	12.4201	37	11.1331	189	12.9922	223	8.6648	203	12.9664	241	0.847664	0.525719	1.20584	0.957872	0.847664	0.525719	1.20584	0.957872	1.40579	0.896617	1.57546	0.655776	-0.0683185	1	translational_only	0.109367	0.999545	1	2	-1	2	2921	94	1495	0.542965
uc007jks.2	Elac2	ENSMUST00000071891	18.2813	128	21.4666	89	26.6182	202	23.115	130	17.7298	568	18.3939	596	22.1267	979	22.7754	801	1.03111	1.16705	1.20299	1.01491	1.03111	1.16705	1.20299	1.01491	1.25121	1.24301	1.00898	0.0128978	0.411785	0.0419525	both	0.725687	0.999545	-1	2	1	1	2781	76	209	0.551241
uc007jkv.1	Arhgap44	ENSMUST00000047463	3.81989	26	2.97738	12	4.20212	31	6.03594	33	4.69002	146	4.95475	156	3.56166	153	3.89661	133	0.814473	0.600916	1.17982	1.54902	0.814473	0.600916	1.17982	1.54902	1.5062	0.773298	1.92798	0.947091	-0.277061	0.602372	translational_only	NA	NA	-1	2	-1	2	4022	323	1272	0.558926
uc007jlt.2	Adprm	ENSMUST00000146338	5.29172	15	3.57464	6	3.90585	12	3.07437	7	13.9637	181	17.1553	225	13.5604	243	14.6231	208	0.378963	0.208369	0.288034	0.210242	0.378963	0.208369	0.288034	0.210242	0.787271	0.905666	0.848371	-0.237232	-0.0460812	1	translational_only	0.288873	0.999545	-1	2	-1	2	1492	208	261	0.448391
uc007jnj.1	Stx8	ENSMUST00000021285	16.9059	33	13.8427	16	8.0353	17	7.01569	11	23.8389	213	21.9011	198	20.5835	254	18.4603	181	0.709172	0.632053	0.390376	0.380042	0.709172	0.632053	0.390376	0.380042	0.489486	0.853601	0.574414	-0.799837	-0.127798	1	translational_only	0.0115696	0.591055	-1	-1	-1	2	4104	18	3375	0.487086
uc007jny.1	Myh10	ENSMUST00000102611	65.7679	1062	62.5155	601	31.4089	550	30.6726	400	27.9635	2022	26.9324	1974	19.2324	1900	15.1366	1203	2.35192	2.3212	1.63312	2.02638	2.35192	2.3212	1.63312	2.02638	0.48394	0.626077	0.783097	-0.352737	-0.585848	0.00294613	both	0.0698444	0.931404	-1	2	-1	-1	7783	299	1553	0.51484
uc007joc.3	Ndel1	ENSMUST00000018880	40.319	116	25.8274	44	22.4481	70	19.4723	45	49.2051	648	44.8158	596	24.1768	438	22.3507	323	0.819408	0.576302	0.928497	0.87122	0.819408	0.576302	0.928497	0.87122	0.633751	0.494863	1.28946	0.366771	-0.917574	2.52987e-07	both	0.466062	0.999545	1	2	-1	-1	2366	202	1126	0.502536
uc007jox.2	Ctc1	ENSMUST00000021278	10.2587	105	6.92995	42	9.37491	104	7.29809	60	6.65951	312	7.27782	345	5.14789	333	5.81583	299	1.54047	0.952201	1.82112	1.25487	1.54047	0.952201	1.82112	1.25487	0.969998	0.786644	1.23401	0.303357	-0.250981	0.575098	translational_only	0.396677	0.999545	1	2	-1	2	4167	222	306	0.535397
uc007jpa.2	Aurkb	ENSMUST00000021277	45.8616	130	32.5403	55	29.2355	90	24.5705	56	48.8005	570	41.5853	504	29.4675	488	37.5325	496	0.939777	0.782495	0.992129	0.654645	0.939777	0.782495	0.992129	0.654645	0.686285	0.741267	0.956165	-0.0646691	-0.313092	0.374348	translational_only	0.481932	0.999545	-1	2	-1	2	1965	324	603	0.445802
uc007jpb.1	Borcs6	ENSMUST00000051888	8.98695	27	11.8267	21	3.37808	11	6.21575	15	12.6885	174	12.0243	167	6.32411	120	7.43568	112	0.708277	0.983561	0.534159		0.708277	0.983561	0.534159	0.835935	0.46094	0.556788	0.809825	-0.304317	-0.751397	0.000984049	both	NA	NA	-1	2	-1	-1	1802	23	696	0.627636
uc007jpc.2	Tmem107	ENSMUST00000094081	18.4657	21	20.7899	14	9.73548	12	7.66299	7	27.6626	144	31.1364	164	15.3385	110	20.8319	119	0.667535	0.667702			0.667535	0.667702	0.63471	0.367848	0.44321	0.615154	0.750846	-0.41341	-0.614573	0.0260744	both	NA	NA	-1	2	-1	-1	1039	138	478	0.505294
uc007jpe.1	Vamp2	ENSMUST00000021273	46.3413	43	16.2809	9	13.8782	14	18.6698	14	23.705	97	23.9396	101	9.11479	52	10.2119	46	1.95491				1.95491	0.680083	1.52261	1.82824	0.519754	0.405643	1.27167	0.346726	-1.21274	1.44017e-06	both	NA	NA	-1	2	-1	-1	2164	98	1715	0.503235
uc007jph.2	Per1	ENSMUST00000166748	8.436	92	8.36217	54	5.83901	69	5.47953	48	5.45162	272	4.79117	242	3.78967	261	4.69278	257	1.54743	1.74533	1.54077	1.16765	1.54743	1.74533	1.54077	1.16765	0.673796	0.828138	0.82254	-0.281842	-0.179576	1	translational_only	0.187782	0.999545	-1	2	-1	2	4645	171	598	0.576534
uc007jpp.1	Cntrob	ENSMUST00000092973	6.28599	47	6.32427	28	3.57852	29	3.82963	23	7.15855	245	7.1904	249	5.45829	258	5.08563	191	0.87811	0.879544	0.655612	0.75303	0.87811	0.879544	0.655612	0.75303	0.58747	0.734822	0.801433	-0.319346	-0.344707	0.217472	translational_only	0.156298	0.999545	-1	2	-1	2	3950	911	375	0.547595
uc007jpq.2	Trappc1	ENSMUST00000102602	49.166	58	20.042	14	39.1053	50	31.6601	30	47.2237	255	55.2741	302	40.4953	302	48.2657	286	1.04113	0.362593	0.965676	0.655953	1.04113	0.362593	0.965676	0.655953	1.0225	0.86598	1.15523	0.208185	-0.113025	1	translational_only	0.639766	0.999545	1	2	-1	2	745	81	226	0.49396
uc007jqa.1	Naa38	ENSMUST00000144531	61.3899	62	48.493	29	50.2454	55	43.1446	35	303.009	1389	293.744	1374	244.297	1551	292.168	1478	0.202601	0.165086	0.205674	0.14767	0.202601	0.165086	0.205674	0.14767	0.849905	0.898973	0.960992	-0.0574035	-0.0568964	1	translational_only	0.393454	0.999545	-1	2	-1	2	518	101	39	0.567568
uc007jqe.1	Kdm6b	ENSMUST00000094077	10.9608	152	14.0076	115	13.7083	206	15.9831	178	6.55115	415	7.1952	461	6.62747	579	7.9793	554	1.67312	1.94679	2.06841	2.00307	1.67312	1.94679	2.06841	2.00307	1.18916	1.06259	1.12475	0.169602	0.181565	1	translational_only	0.661099	0.999545	1	2	1	2	6642	408	1308	0.556459
uc007jqj.1	Wrap53	ENSMUST00000048139	6.04825	27	7.56611	20	7.23375	35	10.3186	37	9.73872	199	10.3988	215	8.96494	253	11.4167	256	0.621052	0.727596	0.806893	0.903815	0.621052	0.727596	0.806893	0.903815	1.28925	1.01213	1.26846	0.34308	0.109931	1	translational_only	0.631776	0.999545	1	2	1	2	1896	272	25	0.563291
uc007jqn.2	Trp53	ENSMUST00000005371	38.7029	105	25.1766	45	38.4676	115	23.1389	53	33.6356	294	36.8722	329	36.5433	415	39.0021	368	1.15065	0.682807	1.05266	0.593271	1.15065	0.682807	1.05266	0.593271	0.964416	1.07145	0.897717	-0.155667	0.134239	1	translational_only	0.498168	0.999545	-1	2	1	2	1772	157	442	0.540632
uc007jqt.1	Fxr2	ENSMUST00000018909	29.1045	165	23.831	80	31.9297	196	31.1829	142	31.2613	808	32.7095	855	37.0424	1315	32.4176	919	0.931006	0.728564	0.861976	0.961913	0.931006	0.728564	0.861976	0.961913	1.19226	1.08581	1.09901	0.136208	0.213265	0.68644	translational_only	0.968579	0.999713	-1	2	1	2	2970	347	598	0.53367
uc007jrc.2	Senp3	ENSMUST00000066760	10.1122	46	6.19562	17	9.11002	45	11.9306	44	18.0752	279	14.4221	226	15.644	303	16.2901	275	0.55945	0.429592	0.582333	0.732379	0.55945	0.429592	0.582333	0.732379	1.29022	0.982671	1.32928	0.410642	-0.00145145	1	translational_only	0.369009	0.999545	1	2	-1	2	2230	107	416	0.526906
uc007jrg.2	Tnfsfm13	ENSMUST00000180587	5.54146	19	3.94037	8	2.15273	8	0.726196	2	9.87609	155	9.82365	156	1.38405	30	1.79998	31	0.561099	0.401111			0.561099	0.401111	1.55538	0.403446	0.303626	0.161628	2.03576	1.02557	-2.54308	1.79084e-25	both	NA	NA	-1	2	-1	-1	2235	344	658	0.495749
uc007jrn.2	Zbtb4	ENSMUST00000108639	11.8312	98	14.8885	73	3.67574	33	5.71135	38	6.39137	242	5.94922	228	1.60524	84	1.8026	75	1.85112	2.50259			1.85112	2.50259	2.28985	3.1684	0.351318	0.276148	1.2537	0.326192	-1.7614	7.46243e-18	both	NA	NA	-1	2	-1	-1	7824	250	4625	0.442996
uc007jrq.2	Chrnb1	ENSMUST00000045971	1.66627	7	2.00999	5	6.58866	30	5.03789	17	3.01821	58	3.39438	66	6.36347	169	7.3177	154			1.03539	0.688453	0.552071	0.592151	1.03539	0.688453	3.16261	2.13348	1.50656	0.59126	1.18375	3.05724e-07	both	NA	NA	-1	2	1	1	2149	58	585	0.455095
uc007jrw.1	Nlgn2	ENSMUST00000056484	10.2295	72	13.1913	55	4.85013	37	10.6042	60	7.55763	243	7.67829	250	3.50738	156	4.47085	158	1.35354	1.718	1.38284	2.37186	1.35354	1.718	1.38284	2.37186	0.659855	0.523646	1.22242	0.289735	-0.840808	9.20111e-05	both	0.608328	0.999545	1	2	-1	-1	5002	411	2080	0.569372
uc007jry.1	Tmem256	ENSMUST00000094065	47.4998	43	37.6635	20	22.6342	22	28.7899	21	122.881	471	106.49	413	58.0007	306	68.2831	294	0.386551	0.35368	0.39024	0.421626	0.386551	0.35368	0.39024	0.421626	0.603831	0.550565	1.09677	0.133266	-0.75102	0.000260464	both	0.829641	0.999545	-1	2	-1	-1	431	40	49	0.584687
uc007jsd.2	Kctd11	ENSMUST00000050555	18.7692	36	10.5658	12	6.2534	13	8.43801	13	11.8457	104	15.8064	140	5.45923	66	5.60496	54	1.58448	0.66845			1.58448	0.66845	1.14547	1.50545	0.500815	0.400122	1.17666	0.234695	-1.22273	1.95244e-06	both	NA	NA	-1	2	-1	-1	2722	775	1248	0.533431
uc007jsp.1	Gps2	ENSMUST00000057884	9.07346	24	8.16042	13	6.19904	18	2.76487	6	16.8782	179	15.2081	162	7.47749	113	9.12996	113	0.537586	0.536583	0.829028		0.537586	0.536583	0.829028	0.302835	0.520133	0.517587	1.05371	0.0754775	-0.785968	0.000959761	both	NA	NA	-1	2	-1	-1	1220	148	88	0.535246
uc007jte.3	Elp5	ENSMUST00000108594	39.6771	99	22.3355	33	34.7585	94	25.4465	51	84.9296	970	79.3508	917	54.3254	854	69.5746	871	0.467176	0.281477	0.639821	0.365744	0.467176	0.281477	0.639821	0.365744	0.970853	0.754198	1.34316	0.425636	-0.314636	0.313683	translational_only	0.567546	0.999545	1	2	-1	2	1435	332	200	0.525436
uc007jtf.1	Ctdnep1	ENSMUST00000108593	22.2626	41	15.7788	18	17.0371	35	16.901	26	61.5211	333	61.8593	355	37.3649	284	39.0439	248	0.36187	0.255076	0.455966	0.432871	0.36187	0.255076	0.455966	0.432871	0.892134	0.619294	1.4407	0.526774	-0.568151	0.00550768	both	0.342135	0.999545	1	2	-1	-1	1614	316	563	0.524783
uc007jtg.2	Gabarap	ENSMUST00000018711	256.563	225	135.759	73	126.314	122	83.1101	61	225.84	813	227.868	830	112.228	566	124.293	491	1.13604	0.595776	1.12551	0.668665	1.13604	0.595776	1.12551	0.668665	0.533807	0.521305	1.03601	0.0510392	-0.833459	1.03364e-06	both	0.939366	0.999545	-1	2	-1	-1	1122	343	425	0.516934
uc007jtm.1	Dvl2	ENSMUST00000102575	22.6698	140	23.7693	87	13.1532	88	13.2807	66	27.6701	770	26.6314	753	11.9019	457	15.8634	486	0.819289	0.89253	1.10513	0.837193	0.819289	0.89253	1.10513	0.837193	0.569216	0.511318	1.13465	0.18225	-0.874502	1.24e-05	both	0.847602	0.999545	1	2	-1	-1	3603	207	1185	0.58368
uc007jtp.2	Dlg4	ENSMUST00000108588	11.657	71	9.97714	36	6.05643	40	6.53779	32	17.476	487	17.4106	490	8.28188	318	9.2588	283	0.667029	0.573051	0.731286	0.706116	0.667029	0.573051	0.731286	0.706116	0.582145	0.502792	1.15912	0.21303	-0.897131	6.61854e-07	both	0.863084	0.999545	1	2	-1	-1	3326	315	836	0.555021
uc007jui.2	Rnasek	ENSMUST00000176116	101.179	79	56.2359	26	106.35	90	78.1292	49	151.651	542	149.326	540	106.138	522	126.978	498	0.667183	0.376598	1.00199	0.615297	0.667183	0.376598	1.00199	0.615297	1.17193	0.774531	1.54945	0.631757	-0.275837	0.430462	translational_only	0.159846	0.999545	1	2	-1	2	961	119	545	0.611863
uc007jup.2	Pelp1	ENSMUST00000019065	28.2958	268	25.3042	142	27.4459	282	24.434	186	19.9655	863	20.7819	910	19.2709	1148	17.4985	830	1.41724	1.21761	1.42422	1.39635	1.41724	1.21761	1.42422	1.39635	0.967907	0.902372	1.07049	0.0982671	-0.0520965	1	translational_only	0.97959	0.999713	1	2	-1	2	3440	19	49	0.54186
uc007juv.1	Med11	ENSMUST00000019067	46.707	44	32.2684	18	14.6909	15	26.4309	20	74.2099	320	65.0916	284	36.1017	215	41.8437	198	0.62939	0.495739	0.406931	0.631659	0.62939	0.495739	0.406931	0.631659	0.520692	0.559545	0.923085	-0.115464	-0.743808	0.000366666	both	0.396862	0.999545	-1	2	-1	-1	889	48	487	0.469066
uc007jve.2	Psmb6	ENSMUST00000018430	111.46	175	47.3488	51	98.6431	160	85.3433	115	299.988	1111	303.782	1210	335.286	1613	373.558	1550	0.371547	0.155864	0.294205	0.228461	0.371547	0.155864	0.294205	0.228461	1.15854	1.17403	0.991003	-0.013039	0.258481	0.462311	translational_only	0.689028	0.999545	-1	2	1	2	1036	40	279	0.516409
uc007jvi.1	Mink1	ENSMUST00000072237	13.7688	156	14.7491	99	8.55259	105	8.23904	75	13.3448	685	12.6435	658	6.70256	476	7.33425	415	1.03177	1.16654	1.27602	1.12337	1.03177	1.16654	1.27602	1.12337	0.588811	0.54012	1.09147	0.126272	-0.789314	8.0393e-06	both	0.956883	0.999545	1	2	-1	-1	4994	189	770	0.560473
uc007jvr.2	Slc25a11	ENSMUST00000014750	55.854	146	50.3932	78	33.5316	95	28.5763	60	83.1586	995	80.0392	969	35.5607	587	49.2766	647	0.671656	0.629607	0.942939	0.579916	0.671656	0.629607	0.942939	0.579916	0.58456	0.519844	1.17029	0.226865	-0.849958	3.91311e-05	both	0.84319	0.999545	1	2	-1	-1	1861	177	739	0.506717
uc007jvt.2	Rnf167	ENSMUST00000037534	5.87417	17	2.33418	4	3.50687	11	3.01126	7	8.68117	115	9.10196	122	6.23108	114	6.87912	100	0.676657				0.676657	0.256448	0.562803	0.43774	0.794086	0.737227	1.07227	0.100672	-0.345901	0.380243	translational_only	NA	NA	-1	2	-1	2	1826	582	200	0.535049
uc007jvv.2	Pfn1	ENSMUST00000018437	1965.66	1418	1217.19	628	1387.62	1136	1133.53	765	1775.81	4921	1749.05	4950	1088.91	4148	1344.4	4050	1.10691	0.695915	1.27431	0.843148	1.10691	0.695915	1.27431	0.843148	0.792101	0.690329	1.17452	0.232073	-0.454816	0.0259724	both	0.524059	0.999545	1	2	-1	-1	870	170	277	0.551724
uc007jvz.2	Spag7	ENSMUST00000018431	58.6352	105	22.8547	25	28.1595	55	20.9559	31	33.0183	242	32.1217	242	33.3461	328	22.51	190	1.77584	0.711505	0.844463	0.930961	1.77584	0.711505	0.844463	0.930961	0.602718	0.857478	0.713782	-0.486444	-0.124921	1	translational_only	0.0863132	0.942633	-1	2	-1	2	1161	135	342	0.507321
uc007jwc.2	Camta2	ENSMUST00000108544	6.66586	68	5.62863	34	4.34128	48	7.20034	59	6.01945	281	6.40258	302	3.21158	207	4.47156	229	1.10739	0.879118	1.35176	1.61025	1.10739	0.879118	1.35176	1.61025	0.938763	0.61851	1.49106	0.576342	-0.601498	0.0157785	both	0.122517	0.999545	1	2	-1	-1	4647	284	736	0.585539
uc007jwl.1	Kif1c	ENSMUST00000102554	74.9984	694	76.4874	420	38.3283	385	45.029	335	89.279	3718	84.6707	3570	42.4104	2440	43.3268	1988	0.840046	0.903352	0.903746	1.03929	0.840046	0.903352	0.903746	1.03929	0.550265	0.492886	1.11451	0.156409	-0.920654	4.67202e-09	both	0.990601	0.999713	1	2	-1	-1	6764	370	3091	0.487286
uc007jxa.2	Rpain	ENSMUST00000018593	9.95737	18	5.60531	6	8.16623	16	6.19824	9	21.5117	178	22.3353	187	21.2637	243	19.9336	181	0.462881	0.250962	0.384045	0.310944	0.462881	0.250962	0.384045	0.310944	0.923007	0.939571	0.973587	-0.0386188	0.00965463	1	translational_only	0.51938	0.999545	-1	2	1	2	1213	307	246	0.487222
uc007jxf.1	C1qbp	ENSMUST00000078528	171.545	396	98.5212	135	222.222	556	162.871	302	226.275	2347	227.45	2399	284.566	4051	311.792	3540	0.758127	0.433156	0.780915	0.52237	0.758127	0.433156	0.780915	0.52237	1.42592	1.31436	1.09402	0.129636	0.481859	0.00757837	both	0.981577	0.999713	-1	2	1	1	1165	76	249	0.528755
uc007jxg.1	Dhx33	ENSMUST00000108527	25.541	150	18.7091	65	16.0242	102	15.8987	75	11.1812	300	10.4828	285	7.89938	293	8.75849	258	2.28428	1.78475	2.02853	1.81523	2.28428	1.78475	2.02853	1.81523	0.721418	0.76892	0.944639	-0.0821652	-0.283808	0.437072	translational_only	0.576575	0.999545	-1	2	-1	2	5179	54	3028	0.4609
uc007jxz.1	Fam64a	ENSMUST00000021164	25.326	47	15.3068	17	11.7176	24	9.91159	15	47.7016	349	47.3541	358	17.3719	192	21.758	192	0.530926	0.323241	0.674513	0.455539	0.530926	0.323241	0.674513	0.455539	0.532307	0.411652	1.32299	0.403797	-1.07049	5.66034e-08	both	0.627574	0.999545	1	2	-1	-1	1466	66	704	0.551842
uc007jyd.1	4933427D14Rik	ENSMUST00000108506	3.83284	31	3.34084	16	2.39556	21	3.38638	22	2.75513	102	2.40259	90	2.62074	134	1.42765	58	1.39117		0.914077		1.39117	1.39052	0.914077	2.37199	0.805993	0.78492	1.18132	0.240403	-0.236846	1	translational_only	NA	NA	-1	2	-1	2	4332	228	1224	0.475762
uc007jyj.1	Txndc17	ENSMUST00000021158	48.6769	42	25.0977	14	36.9025	37	30.1242	23	183.156	453	198.358	499	109.704	361	129.487	368	0.265768	0.126527	0.336382	0.232642	0.265768	0.126527	0.336382	0.232642	0.908534	0.626953	1.4505	0.536553	-0.570943	0.00964266	both	0.284992	0.999545	1	2	-1	-1	1446	70	1004	0.284232
uc007jyk.1	Med31	ENSMUST00000021157	8.50637	9	4.77573	3	17.4406	20	10.5618	9	32.3365	152	29.5774	143	30.8172	194	38.1916	197	0.263058	0.161465	0.565936	0.276547	0.263058	0.161465	0.565936	0.276547	2.10828	1.11459	1.98454	0.988806	0.216686	0.980754	translational_only	NA	NA	-1	2	1	2	1161	604	161	0.534022
uc007jyy.1	Mybbp1a	ENSMUST00000045633	92.1244	939	72.7196	459	131.422	1387	110.884	897	54.0865	2036	54.3168	2066	95.8589	4087	81.2167	3011	1.70328	1.3388	1.37099	1.36529	1.70328	1.3388	1.37099	1.36529	1.46991	1.63349	0.899475	-0.152844	0.581761	0.000645714	both	0.79259	0.999545	-1	2	1	1	4117	6	76	0.542628
uc007jzd.1	Ube2g1	ENSMUST00000021148	44.5451	62	20.6269	17	25.8525	39	16.1003	18	30.0405	191	25.4407	164	15.2601	134	18.0592	126	1.48283	0.810781	1.69412	0.89153	1.48283	0.810781	1.69412	0.89153	0.643724	0.60055	1.12733	0.172906	-0.644723	0.0093194	both	NA	NA	-1	2	-1	-1	3837	329	2995	0.407089
uc007jzh.1	Ankfy1	ENSMUST00000155998	24.6195	243	16.5966	97	15.3301	164	14.6313	116	8.47723	383	8.99066	411	6.51041	406	6.79927	337	2.90419	1.84599	2.35471	2.1519	2.90419	1.84599	2.35471	2.1519	0.726935	0.761951	0.948724	-0.0759398	-0.295811	0.31515	translational_only	0.653558	0.999545	-1	2	-1	2	8034	23	4501	0.448469
uc007jzl.2	Zzef1	ENSMUST00000172220	9.80206	240	10.8978	158	9.27087	246	8.38964	165	5.30892	595	5.61854	637	3.81816	591	4.00856	493	1.84634	1.93962	2.4281	2.09293	1.84634	1.93962	2.4281	2.09293	0.85317	0.716244	1.19416	0.255993	-0.384142	0.0767103	translational_only	0.418702	0.999545	1	2	-1	2	11150	71	2403	0.510673
uc007jzt.1	Camkk1	ENSMUST00000155720	5.19486	22	4.7853	12	1.96075	9	1.46986	5	6.08718	118	5.816	114	2.16641	58	2.30347	49	0.85341				0.85341	0.822782	0.905071	0.638105	0.343743	0.37552	0.920644	-0.119285	-1.31609	2.80913e-08	both	NA	NA	-1	2	-1	-1	3451	161	1772	0.551724
uc007jzv.2	Ncbp3	ENSMUST00000021135	15.6718	81	8.82215	27	9.28254	52	9.64019	40	5.45862	129	4.47723	107	5.88586	192	3.54759	92	2.87102	1.97045	1.57709	2.71739	2.87102	1.97045	1.57709	2.71739	0.772546	0.949436	0.88702	-0.172962	0.0325035	1	translational_only	NA	NA	-1	2	1	2	6284	33	4403	0.367282
uc007jzz.2	Gsg2	ENSMUST00000052140	5.99933	38	5.05678	19	3.78047	26	3.92398	20	6.54328	187	6.31442	184	4.01744	159	3.67221	116	0.916869	0.800829	0.941015	1.06856	0.916869	0.800829	0.941015	1.06856	0.696851	0.598058	1.16992	0.226415	-0.638728	0.00430161	both	NA	NA	-1	2	-1	-1	2811	33	513	0.514052
uc007kab.2	Emc6	ENSMUST00000054952	38.521	34	32.527	17	54.3564	52	50.7779	36	183.253	738	171.48	701	146.394	809	175.026	771	0.210206	0.189683	0.371302	0.290117	0.210206	0.189683	0.371302	0.290117	1.47976	0.906088	1.654	0.725961	-0.0555903	1	translational_only	0.351898	0.999545	1	2	-1	2	1353	152	868	0.427938
uc007kbx.1	Rap1gap2	ENSMUST00000047488	9.68	58	7.61005	27	5.69742	37	5.8178	28	4.81287	132	5.0449	140	3.06243	116	3.5569	107	2.01127	1.50846	1.86042	1.63564	2.01127	1.50846	1.86042	1.63564	0.666003	0.671483	0.993274	-0.00973684	-0.482756	0.0893271	translational_only	NA	NA	-1	2	-1	2	6410	212	4059	0.531669
uc007kca.1	Cluh	ENSMUST00000092915	38.5765	441	36.0454	244	29.781	369	37.2446	342	25.7479	1347	24.9181	1319	20.9632	1515	23.0687	1324	1.49824	1.44656	1.42063	1.61451	1.49824	1.44656	1.42063	1.61451	0.898203	0.869062	1.03068	0.0435968	-0.105628	1	translational_only	0.828768	0.999545	-1	2	-1	2	5399	100	1237	0.559919
uc007kch.1	Mettl16	ENSMUST00000141755	15.9403	74	7.27563	20	13.5146	68	10.9952	41	6.60443	140	6.00705	129	11.9086	348	5.5321	129	2.41358	1.21118	1.13486	1.98752	2.41358	1.21118	1.13486	1.98752	1.05573	1.38292	0.861404	-0.215239	0.570006	0.312772	translational_only	NA	NA	-1	2	1	2	2718	122	934	0.449227
uc007kck.1	Sgsm2	ENSMUST00000057631	3.89225	33	3.98375	20	2.61259	24	2.05574	14	4.87002	189	4.53449	178	1.77362	95	2.27845	97	0.799226	0.878544			0.799226	0.878544	1.47303	0.902254	0.592728	0.430864	1.41574	0.501554	-1.1266	4.51036e-07	both	NA	NA	-1	2	-1	-1	4760	199	1543	0.57563
uc007kco.1	Tsr1	ENSMUST00000045807	42.4304	284	24.5706	98	42.9166	312	34.1517	184	12.4356	381	12.3059	381	16.9449	707	14.8706	497	3.41201	1.99666	2.53272	2.2966	3.41201	1.99666	2.53272	2.2966	1.15026	1.28592	0.892884	-0.163456	0.447968	0.0371773	both	0.520155	0.999545	-1	2	1	1	3385	39	934	0.470015
uc007kcz.1	Smg6	ENSMUST00000045281	8.76207	105	6.3417	45	5.54343	72	6.7528	65	3.41072	187	3.33403	185	3.08883	234	2.90731	175	2.56897	1.90212	1.79467	2.3227	2.56897	1.90212	1.79467	2.3227	0.814117	0.889008	0.920887	-0.118903	-0.0697243	1	translational_only	0.426129	0.999545	-1	2	-1	2	5799	44	1498	0.517503
uc007kdf.1	Ovca2	ENSMUST00000071562	15.6029	29	9.08624	10	12.9066	26	7.36807	11	32.7263	278	32.0623	276	22.2131	261	26.457	247	0.47677	0.283393	0.581033	0.278492	0.47677	0.283393	0.581033	0.278492	0.821195	0.751214	1.13071	0.177232	-0.317941	0.338846	translational_only	0.902295	0.999545	-1	2	-1	2	3147	518	1951	0.452812
uc007kdg.1	Ovca2	ENSMUST00000071562	14.7286	54	12.8974	28	11.8276	47	8.14953	24	17.0419	286	15.2527	259	9.02424	209	12.652	233	0.864261	0.845584	1.31064	0.644129	0.864261	0.845584	1.31064	0.644129	0.723126	0.671205	1.14325	0.193135	-0.484884	0.0936144	translational_only	0.898323	0.999545	1	2	-1	2	3803	24	2462	0.458848
uc007kdi.2	Rpa1	ENSMUST00000092907	96.1102	503	63.2461	196	92.3267	524	73.2665	308	52.7082	1262	49.0377	1188	68.1662	2248	42.9255	1126	1.82344	1.28974	1.35443	1.70683	1.82344	1.28974	1.35443	1.70683	1.03914	1.09185	0.983323	-0.024263	0.222333	1	translational_only	0.653479	0.999545	-1	2	1	2	3043	125	1046	0.485048
uc007kdm.1	Smyd4	ENSMUST00000044530	2.22879	15	4.0149	16	2.60472	19	4.80956	26	4.12254	127	3.40065	106	3.57259	152	3.43141	116	0.540636		0.729085	1.40163	0.540636	1.18063	0.729085	1.40163	1.18748	0.930987	1.23788	0.30787	-0.00412144	1	translational_only	NA	NA	-1	2	-1	2	3517	331	786	0.45863
uc007kdp.1	Serpinf1	ENSMUST00000000769	75.399	263	53.2573	110	34.6506	131	30.3377	85	127.996	2037	142.476	2298	63.2229	1393	78.8205	1381	0.589075	0.373797	0.54807	0.384896	0.589075	0.373797	0.54807	0.384896	0.505131	0.525169	0.96894	-0.0455209	-0.829378	6.87617e-06	both	0.535956	0.999545	-1	2	-1	-1	1494	135	105	0.555556
uc007kdx.1	Prpf8	ENSMUST00000018449	45.7352	904	44.2577	518	80.4261	1723	71.8027	1140	37.8992	3428	37.7458	3454	57.4945	7174	62.0355	6153	1.20676	1.17252	1.39885	1.15745	1.20676	1.17252	1.39885	1.15745	1.69156	1.58014	1.0744	0.103529	0.756193	2.35568e-06	both	0.996851	0.999801	1	2	1	1	7481	315	158	0.514904
uc007kek.1	Inpp5k	ENSMUST00000006286	5.86594	23	5.59925	13	5.1768	22	0.952543	3	7.24329	130	7.98464	145	3.46952	86	3.60499	71	0.809845	0.701252			0.809845	0.701252	1.49208	0.264229	0.534605	0.464574	1.16228	0.216952	-1.00886	8.52132e-06	both	NA	NA	-1	2	-1	-1	2641	80	1154	0.5195
uc007kep.1	Myo1c	ENSMUST00000108431	205.592	1803	172.619	899	111.449	1059	105.59	745	131.343	5201	132.388	5320	62.9097	3454	72.4837	3160	1.56532	1.30389	1.77157	1.45674	1.56532	1.30389	1.77157	1.45674	0.573856	0.513378	1.12516	0.170128	-0.861714	1.49247e-07	both	0.739558	0.999545	1	2	-1	-1	5302	169	1998	0.502263
uc007ket.2	Ywhae	ENSMUST00000067664	883.007	1866	516.251	646	736.216	1684	584.603	991	380.118	3608	370.693	3599	521.289	6759	339.658	3533	2.32298	1.39267	1.4123	1.72116	2.32298	1.39267	1.4123	1.72116	0.943943	1.14669	0.843314	-0.245859	0.277663	0.642128	translational_only	0.240371	0.999545	-1	2	1	2	2078	141	1169	0.416266
uc007kfa.1	Vps53	ENSMUST00000056601	13.1397	92	9.88115	41	14.0997	107	12.0909	68	10.5406	337	11.2429	364	12.4636	549	13.0596	458	1.24658	0.878877	1.13128	0.92583	1.24658	0.878877	1.13128	0.92583	1.13769	1.17167	0.967841	-0.0471579	0.32289	0.218434	translational_only	0.613606	0.999545	-1	2	1	2	2816	131	186	0.507102
uc007kfg.2	Fam57a	ENSMUST00000094014	21.6229	46	22.1979	28	24.2547	56	11.6886	20	13.7425	134	12.0615	119	9.05939	122	7.57005	81	1.57343	1.84039	2.6773		1.57343	1.84039	2.6773	1.54406	0.820233	0.644451	1.23655	0.306318	-0.528411	0.0594543	translational_only	NA	NA	-1	2	-1	2	930	78	78	0.53871
uc007kfi.2	Gemin4	ENSMUST00000102500	10.3432	91	10.6771	56	8.90517	85	8.88613	63	8.12608	302	8.21727	309	5.15298	262	6.57764	269	1.27284	1.29935	1.72816	1.35096	1.27284	1.29935	1.72816	1.35096	0.846386	0.717761	1.19708	0.259519	-0.389582	0.175518	translational_only	0.509392	0.999545	1	2	-1	2	3448	85	186	0.518561
uc007kfl.2	Glod4	ENSMUST00000017430	41.1594	102	19.0811	28	21.966	59	21.0995	42	46.6345	529	49.4003	567	31.6323	495	27.4746	342	0.882596	0.386255	0.694415	0.767964	0.882596	0.386255	0.694415	0.767964	0.714891	0.615473	1.15252	0.204796	-0.600823	0.00193854	both	0.760044	0.999545	1	2	-1	-1	2523	55	1571	0.253666
uc007kfn.2	Rnmtl1	ENSMUST00000040577	14.8716	52	7.24473	15	10.8185	41	12.8177	36	20.0258	320	20.534	332	19.86	439	18.7473	329	0.742621	0.352816	0.544738	0.683711	0.742621	0.352816	0.544738	0.683711	1.06872	0.95186	1.12142	0.165331	0.0293877	1	translational_only	0.977871	0.999713	-1	2	1	2	1492	37	198	0.542895
uc007kfo.2	Nxn	ENSMUST00000021204	61.2491	223	42.2097	91	25.0876	99	21.8841	64	78.0059	1298	80.067	1347	37.0159	850	39.7287	726	0.785185	0.52718	0.677752	0.550838	0.785185	0.52718	0.677752	0.550838	0.454013	0.485501	0.936165	-0.0951656	-0.94481	5.56616e-09	both	0.481646	0.999545	-1	2	-1	-1	2728	81	1339	0.53849
uc007kfz.1	Gosr1	ENSMUST00000010536	22.6966	47	8.15527	10	18.2673	41	13.2263	22	14.0313	133	13.763	132	11.3818	149	11.4405	119	1.61757	0.59255	1.60497	1.15609	1.61757	0.59255	1.60497	1.15609	1.0208	0.821113	1.24928	0.321097	-0.18666	1	translational_only	NA	NA	-1	2	-1	2	4265	5	3507	0.449004
uc007kga.1	Cpd	ENSMUST00000021201	29.5002	343	29.1805	201	32.2249	406	31.4951	294	8.3801	446	8.05541	434	10.7688	790	11.2036	654	3.52027	3.62247	2.99245	2.81117	3.52027	3.62247	2.99245	2.81117	1.08588	1.33688	0.81252	-0.299526	0.513716	0.00700398	both	0.115994	0.999545	-1	2	1	1	9152	42	4976	0.440122
uc007kge.2	Blmh	ENSMUST00000021197	38.0517	145	16.3977	37	35.592	147	24.8298	76	12.8994	225	10.9355	193	24.4215	587	9.76973	187	2.94987	1.49949	1.4574	2.5415	2.94987	1.49949	1.4574	2.5415	1.10969	1.4345	0.898759	-0.153994	0.619625	0.30746	translational_only	0.3446	0.999545	-1	2	1	2	2355	225	762	0.494268
uc007kgl.2	Ssh2	ENSMUST00000037912	2.74408	33	2.10644	15	3.45242	45	3.10568	30	1.38063	76	1.68767	94	1.59158	121	2.05276	124			2.16918	1.51293	1.98755	1.24814	2.16918	1.51293	1.35204	1.18774	1.13797	0.18646	0.337158	0.533125	translational_only	NA	NA	-1	2	1	2	9039	28	4739	0.447395
uc007kgx.1	Ankrd13b	ENSMUST00000092892	8.20076	48	4.90499	17	8.82307	56	9.14165	43	8.4054	224	8.69399	235	7.31582	269	8.63038	253	0.975653	0.564181	1.20603	1.05924	0.975653	0.564181	1.20603	1.05924	1.37075	0.932559	1.47111	0.556906	-0.00744715	1	translational_only	0.162177	0.999545	1	2	-1	2	3336	126	1119	0.571343
uc007kgy.1	Git1	ENSMUST00000037285	24.7302	160	23.9724	92	21.2389	149	26.3737	137	26.0811	768	24.7368	738	15.3282	622	20.7035	669	0.948201	0.969099	1.38562	1.27387	0.948201	0.969099	1.38562	1.27387	0.977619	0.709034	1.3871	0.472073	-0.403662	0.137015	translational_only	0.215017	0.999545	1	2	-1	2	3650	171	1166	0.568767
uc007kgz.1	Trp53i13	ENSMUST00000060417	14.9229	48	10.5007	20	8.03156	28	11.2244	29	22.821	336	26.5147	395	17.1291	348	18.4444	298	0.653912	0.396033	0.468884	0.608555	0.653912	0.396033	0.468884	0.608555	0.757405	0.721049	1.02619	0.0372911	-0.375788	0.145798	translational_only	0.673167	0.999545	-1	2	-1	2	1366	42	166	0.620059
uc007khc.1	Taok1	ENSMUST00000058496	29.0521	245	25.4071	127	27.9891	256	23.022	156	12.3134	475	11.0716	432	10.2879	547	9.87117	418	2.35938	2.2948	2.72059	2.33225	2.35938	2.2948	2.72059	2.33225	0.936686	0.86205	1.08566	0.118566	-0.117209	1	translational_only	0.738833	0.999545	1	2	-1	2	12409	698	8705	0.388992
uc007khd.2	Nufip2	ENSMUST00000100802	36.5023	212	27.8875	96	30.3274	191	30.6083	143	17.6611	467	16.9563	455	14.9583	546	14.4947	421	2.06682	1.64466	2.02746	2.11169	2.06682	1.64466	2.02746	2.11169	0.946357	0.850817	1.11523	0.157336	-0.136775	1	translational_only	0.698473	0.999545	1	2	-1	2	10399	89	8231	0.347053
uc007kht.2	Phf12	ENSMUST00000049167	20.6821	175	22.9525	115	16.356	150	16.3318	111	18.3057	709	18.9146	741	13.778	737	15.4111	655	1.12982	1.21348	1.18711	1.05974	1.12982	1.21348	1.18711	1.05974	0.749124	0.784224	0.958841	-0.0606361	-0.253944	0.456271	translational_only	0.554287	0.999545	-1	2	-1	2	4392	496	884	0.544627
uc007khu.1	Dhrs13	ENSMUST00000021187	15.6044	49	9.68053	18	12.928	44	12.6868	32	22.9794	330	24.4781	356	15.7814	313	18.8296	297	0.67906	0.395477	0.819191	0.673769	0.67906	0.395477	0.819191	0.673769	1.01305	0.729307	1.3894	0.474461	-0.361032	0.188235	translational_only	0.355256	0.999545	1	2	-1	2	1744	59	554	0.576261
uc007kia.2	Eral1	ENSMUST00000021183	16.6765	61	12.9273	28	11.6028	46	13.2737	39	12.1242	203	15.4061	261	9.47064	219	12.5181	230	1.37547	0.839105	1.22513	1.06036	1.37547	0.839105	1.22513	1.06036	0.840313	0.79871	1.03202	0.0454756	-0.231458	0.981562	translational_only	0.897452	0.999545	-1	2	-1	2	2014	24	676	0.478649
uc007kic.2	Fam222b	ENSMUST00000073705	12.5034	59	7.51576	21	9.7822	50	10.8172	41	7.36134	159	6.45169	141	4.69317	140	6.24416	148	1.69853	1.16493	2.08435	1.73237	1.69853	1.16493	2.08435	1.73237	1.02898	0.791812	1.33291	0.414576	-0.247386	0.925741	translational_only	NA	NA	-1	2	-1	2	3884	159	2036	0.534758
uc007kif.2	Traf4	ENSMUST00000149437	12.4121	48	15.1076	35	10.6427	45	12.401	39	33.7705	551	35.4287	577	19.3283	439	25.3457	452	0.367544	0.426422	0.550625	0.489273	0.367544	0.426422	0.550625	0.489273	0.83735	0.645586	1.30975	0.389293	-0.525292	0.0192336	both	0.621439	0.999545	1	2	-1	-1	3016	110	1493	0.530836
uc007kih.2	Nek8	ENSMUST00000017549	3.74601	22	5.75112	20	3.45619	22	1.27189	6	6.24939	168	5.58814	152	2.90891	108	3.83054	113	0.599419	1.02916	1.18814		0.599419	1.02916	1.18814	0.33204	0.497844	0.569329	0.933436	-0.0993772	-0.724273	0.00405885	both	NA	NA	-1	2	-1	-1	2800	60	643	0.569286
uc007kip.2	Supt6	ENSMUST00000002121	25.895	378	21.4028	185	21.0473	333	22.3449	262	17.6069	1176	14.4565	977	15.8551	1462	14.8198	1086	1.47073	1.4805	1.32748	1.50778	1.47073	1.4805	1.32748	1.50778	0.917425	0.956694	0.960704	-0.0578362	0.0329997	1	translational_only	0.542355	0.999545	-1	2	1	2	6201	186	834	0.506531
uc007kiq.2	Sdf2	ENSMUST00000002133	60.3105	108	47.7198	51	45.7829	89	40.6966	59	118.767	912	120.12	927	107.463	1107	95.1694	806	0.507805	0.397268	0.426034	0.427622	0.507805	0.397268	0.426034	0.427622	0.80051	0.848235	0.94319	-0.08438	-0.152755	1	translational_only	0.447769	0.999545	-1	2	-1	2	1268	250	358	0.514196
uc007kir.2	2610507B11Rik	ENSMUST00000010421	19.7851	374	22.6922	254	24.2578	497	30.041	456	23.4285	2019	21.8767	1909	29.0421	3442	19.8362	1875	0.844489	1.03728	0.835265	1.51446	0.844489	1.03728	0.835265	1.51446	1.2783	1.07887	1.24868	0.320404	0.203481	1	translational_only	0.697787	0.999545	1	2	1	2	7443	96	642	0.504232
uc007kiv.2	Spag5	ENSMUST00000045026	20.6379	203	14.7653	86	14.5388	155	13.7958	109	12.6485	569	12.0289	548	15.0567	936	8.11845	401	1.63165	1.22749	0.965604	1.69932	1.63165	1.22749	0.965604	1.69932	0.800342	0.939125	0.932074	-0.101483	0.0103321	1	translational_only	0.324595	0.999545	-1	2	1	2	3822	69	255	0.487964
uc007kiz.1	Pigs	ENSMUST00000048073	40.4231	188	33.7494	93	36.9214	186	39.0583	146	41.67	879	51.0065	1088	32.4948	949	35.6398	826	0.970075	0.66167	1.13622	1.09592	0.970075	0.66167	1.13622	1.09592	1.02436	0.735187	1.36795	0.452014	-0.343118	0.187271	translational_only	0.277354	0.999545	1	2	-1	2	2488	53	767	0.515675
uc007kjn.1	Tmem199	ENSMUST00000052566	19.2493	33	5.91055	6	28.5237	53	16.7025	23	24.4672	192	25.9445	206	34.5661	374	41.2935	355	0.786738	0.227815	0.825193	0.404483	0.786738	0.227815	0.825193	0.404483	1.79755	1.5048	1.21204	0.277433	0.681469	0.00114207	both	0.712782	0.999545	1	2	1	1	1343	61	655	0.492926
uc007kjo.1	Poldip2	ENSMUST00000001127	51.2442	157	39.1002	71	24.0471	80	20.2987	50	59.4916	832	59.9119	847	31.0643	600	35.2193	541	0.861368	0.652628	0.774107	0.576351	0.861368	0.652628	0.774107	0.576351	0.490853	0.555123	0.891982	-0.164913	-0.751655	1.99229e-05	both	0.356801	0.999545	-1	2	-1	-1	1951	16	828	0.538186
uc007kjr.2	Tnfaip1	ENSMUST00000017759	74.4792	193	49.261	76	62.7327	176	51.8865	108	46.496	519	53.1889	607	26.2983	412	39.7517	492	1.60184	0.926152	2.38543	1.30527	1.60184	0.926152	2.38543	1.30527	0.926289	0.662587	1.45993	0.545902	-0.489419	0.0978708	translational_only	0.0748982	0.93535	1	2	-1	2	3709	303	2455	0.475061
uc007kjt.1	Ift20	ENSMUST00000128788	27.1194	29	18.9513	12	18.2638	21	16.3423	14	62.1297	284	61.8147	294	58.2917	368	63.0593	319	0.436496	0.306583	0.313316	0.259157	0.436496	0.306583	0.313316	0.259157	0.751152	0.979077	0.770409	-0.376304	0.0515166	1	translational_only	0.146359	0.999545	-1	2	1	2	802	372	31	0.436409
uc007kkd.2	Lgals9	ENSMUST00000108269	18.6761	55	13.7629	24	7.51905	24	2.9592	7	26.1866	353	22.4348	306	3.54509	66	6.15176	91	0.71319	0.613463			0.71319	0.613463	2.12098	0.481033	0.323014	0.199436	1.96133	0.971834	-2.2455	2.22328e-19	both	NA	NA	-1	2	-1	-1	1586	108	416	0.518285
uc007kki.1	Wsb1	ENSMUST00000017821	47.9833	169	32.1259	67	54.2255	207	43.1238	122	41.6876	671	41.686	680	52.9941	1179	48.6504	860	1.15102	0.770663	1.02324	0.886401	1.15102	0.770663	1.02324	0.886401	1.21521	1.21914	0.993731	-0.00907271	0.384161	0.0713857	translational_only	0.685716	0.999545	-1	2	1	2	2490	303	921	0.437349
uc007kkl.1	Nf1	ENSMUST00000071325	15.0871	363	11.6515	166	12.1942	318	13.1427	254	8.06296	888	8.01361	893	6.54235	995	7.69606	930	1.87116	1.45397	1.86389	1.70772	1.87116	1.45397	1.86389	1.70772	0.94758	0.885662	1.07413	0.103167	-0.0791095	1	translational_only	0.881027	0.999545	1	2	-1	2	11847	108	3213	0.440871
uc007klb.1	Utp6	ENSMUST00000043152	35.0895	176	19.1918	57	27.2242	148	25.5655	103	8.934	205	7.40407	172	17.0302	540	7.77958	196	3.92763	2.59206	1.59859	3.28624	3.92763	2.59206	1.59859	3.28624	0.972522	1.51852	0.749241	-0.416498	0.704634	0.119754	translational_only	0.0197584	0.643241	-1	-1	1	2	3871	78	1999	0.35598
uc007klc.1	Suz12	ENSMUST00000017692	20.3153	125	14.3814	53	13.4521	90	15.1194	75	10.338	283	8.45635	236	7.99552	302	7.51047	227	1.96511	1.70067	1.68245	2.01311	1.96511	1.70067	1.68245	2.01311	0.823462	0.825034	1.00812	0.0116745	-0.180238	1	translational_only	0.764052	0.999545	-1	2	-1	2	4373	214	1933	0.384404
uc007klg.2	Atad5	ENSMUST00000017694	4.46714	69	4.92005	45	5.49538	92	5.96438	74	2.80045	198	2.40473	172	2.82755	276	2.69428	209	1.59515	2.04599	1.94351	2.21373	1.59515	2.04599	1.94351	2.21373	1.22079	1.06083	1.14174	0.191237	0.183463	1	translational_only	0.61181	0.999545	1	2	1	2	7272	371	1420	0.406491
uc007klj.1	Tefm	ENSMUST00000050207	7.57001	23	3.335	6	8.50268	28	4.09753	10	10.9396	152	12.0097	169	9.9012	190	10.0908	154	0.691985	0.277692	0.858753	0.406066	0.691985	0.277692	0.858753	0.406066	1.15545	0.871138	1.30437	0.383355	-0.101853	1	translational_only	0.568034	0.999545	1	2	-1	2	1287	34	158	0.448329
uc007klq.2	Rhot1	ENSMUST00000055056	13.2757	75	11.0549	37	13.0651	80	13.656	62	15.9322	412	17.4953	458	12.8584	459	13.0739	371	0.833261	0.63188	1.01608	1.04452	0.833261	0.63188	1.01608	1.04452	1.09825	0.775777	1.40642	0.492027	-0.269365	0.418217	translational_only	0.272326	0.999545	1	2	-1	2	4260	193	2048	0.394836
uc007klv.2	5730455P16Rik	ENSMUST00000103225	10.9608	36	4.11346	8	4.21368	15	3.41143	9	6.51853	98	6.37662	97	5.44227	113	4.61067	76	1.68149		0.77425		1.68149	0.645085	0.77425	0.739899	0.505835	0.779591	0.650807	-0.619699	-0.254447	0.875915	translational_only	NA	NA	-1	2	-1	2	4536	34	3320	0.300265
uc007klz.2	Zfp207	ENSMUST00000165565	115.089	476	92.5623	227	117.785	528	105.654	351	153.117	2873	155.493	2948	151.45	3903	169.432	3479	0.75164	0.595284	0.777715	0.623578	0.75164	0.595284	0.777715	0.623578	1.07603	1.03977	1.04037	0.0570902	0.148651	1	translational_only	0.769662	0.999545	-1	2	1	2	2362	176	698	0.447502
uc007kmh.1	Myo1d	ENSMUST00000041065	15.7996	134	7.56661	38	5.21996	48	7.04589	48	5.61963	217	5.13241	201	2.43682	130	2.73295	116	2.8115	1.47428	2.14212	2.57813	2.8115	1.47428	2.14212	2.57813	0.52494	0.480818	1.10137	0.139303	-0.962625	4.41754e-06	both	NA	NA	-1	2	-1	-1	5353	233	2099	0.526807
uc007kmj.1	Tmem98	ENSMUST00000040865	25.1725	47	16.2809	18	19.766	40	14.0024	21	54.7593	468	55.7383	482	24.2301	286	31.9879	300	0.459694	0.292095	0.81576	0.43774	0.459694	0.292095	0.81576	0.43774	0.814609	0.508772	1.66735	0.737561	-0.882112	1.38954e-05	both	0.146207	0.999545	1	2	-1	-1	1393	98	614	0.501795
uc007kmp.1	Ccl2	ENSMUST00000000193	29.8721	36	22.4212	16	41.3415	54	66.1145	64	71.0612	392	70.7552	394	94.8594	721	131.991	799	0.420372	0.316885	0.435819	0.5009	0.420372	0.316885	0.435819	0.5009	2.05487	1.59961	1.27055	0.345449	0.772844	0.000415929	both	0.891143	0.999545	1	2	1	1	806	85	274	0.434243
uc007kmq.2	Ccl7	ENSMUST00000021011	55.6774	43	17.4935	8	58.5377	49	74.1518	46	76.376	270	56.3998	201	68.0001	332	90.9957	353	0.728991	0.310169	0.860848	0.814894	0.728991	0.310169	0.860848	0.814894	1.81342	1.19747	1.61259	0.689382	0.35523	0.425335	translational_only	0.132681	0.999545	1	2	1	2	799	72	433	0.430538
uc007kmy.1	Zfp830	ENSMUST00000056677	14.2188	43	9.49338	17	11.5825	38	6.58056	16	5.71766	79	4.91711	69	8.85638	169	3.0254	46			1.30781		2.48683	1.93068	1.30781	2.1751	0.765979	1.11726	0.788435	-0.342936	0.266725	1	translational_only	NA	NA	-1	2	1	2	3278	27	2159	0.363331
uc007knt.2	Nle1	ENSMUST00000103213	20.6631	84	14.9553	36	20.8801	92	23.2747	76	43.1534	803	43.0209	810	40.875	1049	46.279	945	0.47883	0.347629	0.510829	0.502921	0.47883	0.347629	0.510829	0.502921	1.23966	1.01137	1.22662	0.294687	0.11188	1	translational_only	0.84779	0.999545	1	2	1	2	1767	39	270	0.598755
uc007kot.1	Ap2b1	ENSMUST00000018875	27.2927	207	18.8652	87	16.9127	141	12.7512	80	15.5572	499	15.479	505	8.81584	394	9.44168	344	1.75435	1.21876	1.91844	1.35052	1.75435	1.21876	1.91844	1.35052	0.642659	0.588266	1.09951	0.136857	-0.641179	0.000645441	both	0.815531	0.999545	1	2	-1	-1	5409	164	2389	0.476798
uc007kpf.1	Taf15	ENSMUST00000021018	48.0846	222	45.8365	126	43.9917	220	34.079	127	23.7425	483	20.9069	435	32.1241	879	16.7237	375	2.02525	2.19241	1.36943	2.03776	2.02525	2.19241	1.36943	2.03776	0.831237	1.09403	0.807839	-0.307861	0.200152	1	translational_only	0.10628	0.99556	-1	2	1	2	2049	92	283	0.400683
uc007kpu.1	Heatr6	ENSMUST00000001002	10.9027	109	14.0204	83	9.32088	101	9.09297	73	11.7663	538	10.1936	472	7.81618	494	8.53011	428	0.926601	1.37542	1.19251	1.06598	0.926601	1.37542	1.19251	1.06598	0.738827	0.74437	0.981094	-0.027537	-0.329889	0.237158	translational_only	0.683131	0.999545	-1	2	-1	2	5673	86	2032	0.453552
uc007kpz.2	Ddx52	ENSMUST00000049257	24.2823	122	11.0923	33	19.2818	105	16.1063	65	15.5319	357	15.1269	352	19.4366	617	13.6782	345	1.56338	0.73328	0.992037	1.17752	1.56338	0.73328	0.992037	1.17752	1.00038	1.08011	0.944657	-0.0821379	0.212109	1	translational_only	0.596135	0.999545	-1	2	1	2	3164	88	1279	0.423515
uc007kqd.1	Dusp14	ENSMUST00000100705	40.6891	64	12.5898	12	30.7022	53	24.706	32	50.989	344	50.4878	342	45.657	405	60.9534	440	0.797998	0.249363	0.672454	0.405325	0.797998	0.249363	0.672454	0.405325	1.03996	1.05059	1.02904	0.0413031	0.119094	1	translational_only	0.931107	0.999545	1	2	1	2	1443	274	572	0.528067
uc007kqf.1	Tada2a	ENSMUST00000018795	17.2564	64	4.09816	9	12.4385	50	9.399	28	8.54125	145	6.92779	119	11.857	278	5.68999	106	2.02036	0.591554	1.04904	1.65185	2.02036	0.591554	1.04904	1.65185	1.02262	1.13433	1.03407	0.0483269	0.286614	1	translational_only	NA	NA	-1	2	1	2	2119	115	672	0.465314
uc007kql.1	Acaca	ENSMUST00000103201	2.64493	51	2.16417	25	2.63905	55	1.99333	31	1.17873	99	0.751827	64	1.00277	113	1.00409	92	2.24388		2.63175		2.24388	2.87855	2.63175	1.98521	0.963252	1.03952	0.901322	-0.149886	0.126435	1	translational_only	NA	NA	-1	2	1	2	9032	26	1968	0.491918
uc007kqm.1	Aatf	ENSMUST00000018841	37.4012	164	24.9375	65	24.3862	115	24.1331	85	16.9884	339	14.753	300	21.6354	592	15.5222	341	2.20157	1.69034	1.12714	1.55475	2.20157	1.69034	1.12714	1.55475	0.778318	1.17063	0.689095	-0.537225	0.319231	0.45849	translational_only	0.0147194	0.60262	-1	-1	1	2	1800	119	100	0.478333
uc007kqv.1	Ggnbp2	ENSMUST00000172405	31.5005	185	23.5796	82	27.0211	172	23.318	110	21.8729	588	20.1835	549	31.4206	1166	19.2544	568	1.44016	1.16826	0.859981	1.21105	1.44016	1.16826	0.859981	1.21105	0.913927	1.20493	0.793978	-0.332829	0.36836	0.417094	translational_only	0.0958034	0.964208	-1	2	1	2	2950	204	649	0.429153
uc007krd.2	Myo19	ENSMUST00000093969	8.12897	66	9.56476	46	7.27024	64	8.12399	53	13.7324	510	12.4988	470	8.15234	418	8.69232	354	0.591954	0.765257	0.891798	0.934616	0.591954	0.765257	0.891798	0.934616	0.870039	0.642162	1.34571	0.428369	-0.543859	0.00638985	both	0.391701	0.999545	1	2	-1	-1	3924	422	610	0.543833
uc007kre.1	Znhit3	ENSMUST00000103195	13.8144	17	13.7233	10	17.9939	24	26.3033	26	45.6247	257	43.8633	250	42.5166	330	53.9962	333	0.302784	0.312866	0.42322	0.487133	0.302784	0.312866	0.42322	0.487133	1.6086	1.0785	1.47868	0.564314	0.198984	0.993086	translational_only	0.543333	0.999545	1	2	1	2	983	15	512	0.374364
uc007krh.1	Usp32	ENSMUST00000108075	8.92197	121	6.47522	52	5.44245	80	5.04884	55	5.4815	340	4.83979	304	4.05237	347	3.83374	261	1.62765	1.33791	1.34303	1.31695	1.62765	1.33791	1.34303	1.31695	0.681376	0.764063	0.896954	-0.156895	-0.290318	0.393956	translational_only	0.372164	0.999545	-1	2	-1	2	6924	187	1922	0.431831
uc007krj.1	Appbp2	ENSMUST00000018625	38.1431	187	23.0662	67	37.6603	200	30.1838	119	16.2293	360	18.6044	420	14.4677	444	13.9604	342	2.35026	1.23982	2.60306	2.1621	2.35026	1.23982	2.60306	2.1621	1.1084	0.816109	1.32731	0.40851	-0.193228	0.923519	translational_only	0.101858	0.989559	1	2	-1	2	2405	311	336	0.482744
uc007krl.2	Ppm1d	ENSMUST00000020835	7.56334	38	5.04194	15	4.77455	26	6.19475	25	7.08762	163	6.96182	162	5.70183	181	5.46821	138	1.06712	0.724227	0.837372	1.13287	1.06712	0.724227	0.837372	1.13287	0.870214	0.795052	1.09986	0.137325	-0.231999	0.795612	translational_only	NA	NA	-1	2	-1	2	2894	219	878	0.476849
uc007ksf.2	Brip1	ENSMUST00000044423	4.03524	40	3.40734	20	3.25766	35	3.26539	26	2.3141	105	2.02683	93	2.37837	149	2.06862	103	1.74376		1.3697	1.57853	1.74376	1.68112	1.3697	1.57853	0.876452	1.02444	0.860829	-0.216202	0.137676	1	translational_only	NA	NA	-1	2	1	2	6933	115	3293	0.317467
uc007ksj.1	Ints2	ENSMUST00000018212	9.78613	99	8.51377	51	11.4915	126	7.50687	61	6.02508	279	5.97601	280	6.8331	437	5.92515	301	1.62423	1.42466	1.68173	1.26695	1.62423	1.42466	1.68173	1.26695	1.03817	1.06309	0.967133	-0.0482131	0.188259	0.989398	translational_only	0.640249	0.999545	-1	2	1	2	5922	376	1949	0.419791
uc007ksk.1	Med13	ENSMUST00000043624	18.5043	340	15.2573	166	12.1015	241	15.3128	226	13.2215	1112	12.7987	1089	10.7249	1245	10.394	959	1.39956	1.1921	1.12836	1.47324	1.39956	1.1921	1.12836	1.47324	0.811998	0.811631	1.00384	0.00552578	-0.203899	0.678643	translational_only	0.653633	0.999545	-1	2	-1	2	11787	0	5271	0.384152
uc007ksl.1	Rnft1	ENSMUST00000020827	21.5061	71	15.3462	30	16.7681	60	13.9527	37	35.1683	531	35.774	547	22.8463	476	22.6136	375	0.611517	0.428976	0.733952	0.617004	0.611517	0.428976	0.733952	0.617004	0.833619	0.6408	1.29838	0.376714	-0.544708	0.00393288	both	0.549833	0.999545	1	2	-1	-1	4434	194	3052	0.331078
uc007ksn.2	Rps6kb1	ENSMUST00000154617	30.2145	133	19.95	52	15.71	75	16.4038	58	15.9226	320	15.0094	306	14.5194	403	10.4677	231	1.89758	1.32917	1.082	1.5671	1.89758	1.32917	1.082	1.5671	0.640169	0.807805	0.820979	-0.284583	-0.206526	1	translational_only	0.141357	0.999545	-1	2	-1	2	5393	101	3714	0.38346
uc007ksr.1	Tubd1	ENSMUST00000020821	1.96382	8	4.97471	12	3.62376	16	5.50094	18	5.41645	101	6.04217	114	5.71203	147	5.91332	121			0.634409	0.930261	0.362565	0.823332	0.634409	0.930261	1.31508	1.01455	1.3194	0.399879	0.11661	1	translational_only	NA	NA	-1	2	1	2	2070	394	215	0.409179
uc007ksv.1	Vmp1	ENSMUST00000018315	23.834	77	21.4112	42	29.753	104	30.9159	81	56.5395	697	59.9731	752	70.7762	1124	69.6135	916	0.421547	0.357014	0.420381	0.444108	0.421547	0.357014	0.420381	0.444108	1.34089	1.20493	1.11037	0.151039	0.292488	0.256878	translational_only	0.976023	0.999713	-1	2	1	2	2773	109	1443	0.433466
uc007ksy.1	Ptrh2	ENSMUST00000108021	15.6789	22	13.9099	12	12.8909	20	14.5267	17	34.4952	155	35.477	152	23.684	133	31.0408	146	0.454523	0.392082	0.544284	0.467988	0.454523	0.392082	0.544284	0.467988	0.926623	0.782096	1.19568	0.257836	-0.323995	0.550742	translational_only	NA	NA	-1	2	-1	2	3133	231	2353	0.323971
uc007kta.1	Cltc	ENSMUST00000103186	126.724	1795	91.0888	764	123.564	1897	86.6614	986	41.9541	2718	41.4098	2715	41.417	3705	43.5284	3097	3.02054	2.19969	2.98341	1.99092	3.02054	2.19969	2.98341	1.99092	0.965164	1.01897	0.952894	-0.0696121	0.124764	1	translational_only	0.655478	0.999545	-1	2	1	2	6144	203	913	0.437174
uc007ktc.1	Dhx40	ENSMUST00000018569	11.4323	75	10.0395	39	10.5478	75	11.1964	59	8.12541	244	7.53677	229	9.67726	401	7.58661	250	1.40698	1.33207	1.08996	1.47581	1.40698	1.33207	1.08996	1.47581	1.01269	1.10226	0.936735	-0.0942877	0.241415	0.766026	translational_only	0.42262	0.999545	-1	2	1	2	3724	111	1273	0.375134
uc007ktg.1	Smg8	ENSMUST00000020801	9.21099	77	8.08075	40	8.388	76	10.8716	73	8.94373	342	9.16899	355	9.82073	519	9.69272	407	1.02988	0.881313	0.854111	1.12162	1.02988	0.881313	0.854111	1.12162	1.1138	1.07733	1.03377	0.0479118	0.205796	0.775333	translational_only	0.704669	0.999545	-1	2	1	2	3221	24	221	0.502328
uc007kth.2	Prr11	ENSMUST00000051395	17.957	54	8.28352	15	9.69028	32	12.7142	31	14.2673	189	13.3753	177	12.5672	227	11.9567	175	1.25861	0.619316	0.771078	1.06336	1.25861	0.619316	0.771078	1.06336	0.853812	0.887176	0.97684	-0.033806	-0.0698647	1	translational_only	0.633305	0.999545	-1	2	-1	2	3827	79	2641	0.291874
uc007ktz.1	Mtmr4	ENSMUST00000103179	20.2135	203	18.3191	109	14.0522	153	11.0266	89	14.2227	654	13.8748	645	8.64968	549	8.36787	422	1.42121	1.32031	1.62459	1.31774	1.42121	1.32031	1.62459	1.31774	0.650848	0.60566	1.07325	0.10198	-0.625414	0.000501589	both	0.961952	0.999545	1	2	-1	-1	5692	76	2043	0.496486
uc007kue.2	Rnf43	ENSMUST00000165679	2.42322	16	2.81346	11	6.14829	44	8.10763	43	2.15064	65	2.38711	73	4.86328	203	6.87747	228			1.26423	1.17887	1.12674	1.17861	1.26423	1.17887	2.72232	2.58735	1.05975	0.0837269	1.46058	6.25006e-09	both	NA	NA	-1	2	1	1	4311	616	1340	0.547205
uc007kva.2	Dynll2	ENSMUST00000020775	129.612	88	89.7875	37	110.072	81	122.143	68	116.182	337	109.506	330	130.47	511	122.759	389	1.1156	0.819934	0.843656	0.994983	1.1156	0.819934	0.843656	0.994983	1.05841	1.12203	0.949941	-0.0740903	0.22585	0.654659	translational_only	0.561199	0.999545	-1	2	1	2	2476	298	1908	0.537157
uc007kvl.2	Msi2	ENSMUST00000107909	16.3201	47	14.6603	25	22.7688	71	14.698	34	14.446	188	15.2644	202	14.2846	257	11.461	164	1.12973	0.960419	1.59393	1.28243	1.12973	0.960419	1.59393	1.28243	1.20937	0.866552	1.37615	0.46064	-0.104838	1	translational_only	0.220559	0.999545	1	2	-1	2	6528	177	5310	0.420343
uc007kvw.1	Akap1	ENSMUST00000018572	25.5165	184	29.0175	124	33.5354	262	36.2415	210	27.4604	900	28.0552	930	31.1603	1406	27.8486	1000	0.929212	1.0343	1.07622	1.30137	0.929212	1.0343	1.07622	1.30137	1.27951	1.06293	1.21089	0.276066	0.183314	0.875606	translational_only	0.640284	0.999545	1	2	1	2	3758	221	963	0.535923
uc007kvx.2	Scpep1	ENSMUST00000000287	116.595	441	75.8477	170	104.56	428	95.2671	289	104.709	1802	110.512	1920	87.9696	2094	95.9541	1808	1.11351	0.686331	1.18859	0.99284	1.11351	0.686331	1.18859	0.99284	1.03837	0.85458	1.21201	0.277404	-0.128337	1	translational_only	0.556098	0.999545	1	2	-1	2	2074	73	642	0.426712
uc007kwa.1	Coil	ENSMUST00000036649	4.57185	22	5.6152	16	5.36854	28	4.65688	18	5.13015	113	5.42915	121	4.76928	145	4.30267	104	0.891172	1.03427	1.12565		0.891172	1.03427	1.12565	1.08232	0.984134	0.859143	1.14674	0.197533	-0.117622	1	translational_only	NA	NA	-1	2	-1	2	2678	85	871	0.514937
uc007kwp.1	Mmd	ENSMUST00000004050	10.6655	21	5.14626	6	8.43462	18	11.3976	18	17.0496	153	13.8368	126	9.64064	120	11.9311	118	0.62556	0.371925	0.874902	0.955284	0.62556	0.371925	0.874902	0.955284	1.25427	0.698422	1.8348	0.875624	-0.422783	0.240054	translational_only	NA	NA	-1	2	-1	2	3332	905	1710	0.444178
uc007kwz.1	Cox11	ENSMUST00000020851	1.76743	4	6.69912	9	4.87988	12	5.50094	10	9.64026	94	9.09801	90	12.2649	161	10.6423	111			0.397874		0.183339	0.736328	0.397874	0.516893	1.2261	1.22248	0.994672	-0.00770674	0.353569	0.371922	translational_only	NA	NA	-1	2	1	2	2259	6	1425	0.412572
uc007kxb.1	Tom1l1	ENSMUST00000107868	7.83517	26	1.52677	3	6.11684	22	4.50204	12	6.91859	105	6.65373	102	6.4095	134	6.65938	111	1.13248		0.954339		1.13248	0.22946	0.954339	0.676046	1.13426	0.962907	1.1971	0.259548	0.0415001	1	translational_only	NA	NA	-1	2	1	2	2093	279	620	0.452461
uc007kxk.1	Utp18	ENSMUST00000066888	32.6063	151	19.3157	53	29.0697	146	20.9687	78	26.1194	553	25.8608	554	39.6755	1158	27.2191	632	1.24836	0.746911	0.732688	0.770369	1.24836	0.746911	0.732688	0.770369	0.963723	1.28692	0.753311	-0.408682	0.461867	0.101324	translational_only	0.0919008	0.95901	-1	2	1	2	2613	109	845	0.384615
uc007kxu.1	Nme1	ENSMUST00000135884	395.18	436	278.779	191	445.64	537	350.753	322	802.401	3273	732.931	3073	879.813	4862	946.924	4252	0.492497	0.380361	0.506516	0.370413	0.492497	0.380361	0.506516	0.370413	1.18166	1.1898	1.00466	0.00671325	0.325928	0.149651	translational_only	0.643495	0.999545	-1	2	1	2	1235	305	471	0.517409
uc007kxy.1	Spag9	ENSMUST00000041956	29.4946	329	25.1322	166	22.9232	277	18.7646	168	13.9534	711	13.6193	702	9.47338	666	8.82353	493	2.11379	1.84534	2.41975	2.12666	2.11379	1.84534	2.41975	2.12666	0.763139	0.663588	1.14833	0.199543	-0.494142	0.0100275	both	0.550116	0.999545	1	2	-1	-1	7391	180	3245	0.427547
uc007kyf.1	Tob1	ENSMUST00000041589	22.5913	68	22.3792	40	22.6826	74	20.2476	49	25.9862	354	27.1692	372	26.6956	497	24.5972	367	0.869355	0.823697	0.849675	0.823166	0.869355	0.823697	0.849675	0.823166	0.954629	0.964958	0.988062	-0.017326	0.0432304	1	translational_only	0.608713	0.999545	-1	2	1	2	2285	432	764	0.418381
uc007kyh.1	Luc7l3	ENSMUST00000021226	35.4702	146	22.5657	55	30.2603	135	31.758	105	9.30738	175	8.23545	157	13.9597	363	12.3335	255	3.81097	2.74007	2.16769	2.57494	3.81097	2.74007	2.16769	2.57494	1.06862	1.4988	0.72395	-0.466038	0.684519	0.00133868	both	0.0316811	0.778383	-1	-1	1	1	3296	123	1697	0.392597
uc007kyl.1	Ankrd40	ENSMUST00000107818	18.813	57	17.2791	31	19.4891	64	21.7777	53	33.4062	462	32.0981	450	24.8456	475	29.043	442	0.56316	0.538322	0.78441	0.749845	0.56316	0.538322	0.78441	0.749845	1.14338	0.822673	1.3929	0.478092	-0.184957	0.982196	translational_only	0.397334	0.999545	1	2	-1	2	3493	253	2148	0.458059
uc007kys.2	Cacna1g	ENSMUST00000021234	1.75172	34	2.26354	26	1.04532	22	1.60284	25	1.5497	137	1.68563	151	1.01991	125	0.965708	94	1.13036	1.34285	1.02491		1.13036	1.34285	1.02491	1.65975	0.659522	0.613731	1.0855	0.118355	-0.599557	0.013562	both	NA	NA	-1	2	-1	-1	8223	581	754	0.578743
uc007kyu.2	Epn3	ENSMUST00000127305	8.60338	46	7.26466	23	3.96888	23	3.25981	14	9.58651	234	9.66155	239	3.37806	114	4.06287	109	0.897447	0.751915	1.1749		0.897447	0.751915	1.1749	0.802342	0.455551	0.386581	1.19879	0.261582	-1.27898	2.94247e-10	both	NA	NA	-1	2	-1	-1	3884	421	1552	0.538877
uc007kze.1	Lrrc59	ENSMUST00000021239	339.379	866	232.704	352	375.784	1037	349.916	718	303.172	3494	291.326	3401	262.804	4183	266.583	3379	1.11943	0.798775	1.4299	1.3126	1.11943	0.798775	1.4299	1.3126	1.26852	0.890477	1.42972	0.515737	-0.0691415	1	translational_only	0.141492	0.999545	1	2	-1	2	2780	181	1675	0.5
uc007kzf.1	Eme1	ENSMUST00000039949	5.43183	26	4.58662	13	3.66231	19	4.94174	19	4.97487	109	4.10723	91	6.67552	202	3.91195	94	1.09185		0.548619		1.09185	1.11672	0.548619	1.26324	0.858821	1.16575	0.820377	-0.285641	0.328212	0.878152	translational_only	NA	NA	-1	2	1	2	2228	88	427	0.527828
uc007kzi.2	Xylt2	ENSMUST00000116349	8.23658	60	8.34593	36	4.68626	37	7.85543	46	10.6455	354	12.1307	408	6.85306	314	7.86494	287	0.773719	0.688002	0.683821	0.99879	0.773719	0.688002	0.683821	0.99879	0.75632	0.646203	1.15112	0.203034	-0.53591	0.0132752	both	0.968572	0.999713	1	2	-1	-1	3424	86	740	0.599299
uc007kzn.2	Col1a1	ENSMUST00000001547	2501.88	30413	2534.67	18249	1448.83	19120	1361.85	13316	1686.76	90842	1767.84	97029	938.416	69816	941.004	56174	1.48325	1.43377	1.54391	1.44723	1.48325	1.43377	1.54391	1.44723	0.558056	0.544034	1.02541	0.0362013	-0.77831	5.21127e-07	both	0.848835	0.999545	-1	2	-1	-1	5930	145	1423	0.584823
uc007kzr.2	Ppp1r9b	ENSMUST00000038696	37.3391	257	49.0724	200	38.6058	288	48.8369	270	25.4133	800	24.9068	793	26.7613	1163	19.9661	690	1.46928	1.97024	1.4426	2.44599	1.46928	1.97024	1.4426	2.44599	1.01193	0.928605	1.13056	0.177038	-0.00704209	1	translational_only	0.864599	0.999545	1	2	-1	2	4330	336	1540	0.615935
uc007kzt.1	Samd14	ENSMUST00000055947	6.02046	21	8.23067	17	8.19975	31	8.92285	25	10.2716	164	12.0802	195	9.30416	205	11.3579	199	0.586128	0.681335	0.8813	0.785606	0.586128	0.681335	0.8813	0.785606	1.20149	0.924404	1.31515	0.395229	-0.0204472	1	translational_only	0.5215	0.999545	1	2	-1	2	3318	710	1354	0.599759
uc007lae.2	Kat7	ENSMUST00000107734	42.4574	218	30.2594	92	27.8521	155	20.852	86	20.5081	482	16.2916	387	11.0599	359	12.6858	327	2.07027	1.85736	2.51829	1.64372	2.07027	1.85736	2.51829	1.64372	0.669778	0.645269	1.05968	0.0836223	-0.536847	0.0224609	both	0.942907	0.999545	1	2	-1	-1	5966	197	3933	0.484244
uc007lah.1	Slc35b1	ENSMUST00000021243	48.8468	131	36.5232	58	45.0677	131	48.2782	104	85.3063	1045	95.8053	1190	96.9521	1642	109.198	1471	0.572605	0.381224	0.464845	0.442118	0.572605	0.381224	0.464845	0.442118	1.09343	1.13825	0.950866	-0.0726858	0.284832	0.313683	translational_only	0.447321	0.999545	-1	2	1	2	1169	88	112	0.514115
uc007laj.1	Spop	ENSMUST00000107724	38.2756	119	38.6016	71	52.5164	176	41.6449	104	28.6979	398	25.7242	363	42.7529	812	23.7436	360	1.33375	1.5006	1.22837	1.75394	1.33375	1.5006	1.22837	1.75394	1.22483	1.22187	1.05221	0.0734181	0.37624	0.539236	translational_only	0.860142	0.999545	-1	2	1	2	2882	188	1569	0.454198
uc007laq.1	Zfp652	ENSMUST00000107717	11.4091	58	7.30843	22	5.63248	31	5.39067	22	8.02392	181	7.58427	174	4.149	130	4.38577	109	1.42189	0.96363	1.35755	1.22913	1.42189	0.96363	1.35755	1.22913	0.58892	0.546813	1.08432	0.116797	-0.771329	0.000416738	both	NA	NA	-1	2	-1	-1	2732	251	654	0.50549
uc007lay.2	Igf2bp1	ENSMUST00000013559	33.4152	159	22.1359	63	20.649	107	22.5082	87	18.1454	383	19.1159	406	16.1604	463	16.8256	389	1.84152	1.15798	1.27775	1.33774	1.84152	1.15798	1.27775	1.33774	0.776893	0.885263	0.871973	-0.197645	-0.0884901	1	translational_only	0.350322	0.999545	-1	2	-1	2	8381	311	6336	0.495287
uc007lbb.1	Snf8	ENSMUST00000006217	4.06891	8	7.35985	9	2.28709	5	4.24315	7	21.3256	132	19.5385	128	18.4403	155	14.9319	108	0.190799	0.376685	0.124027		0.190799	0.376685	0.124027	0.284167	0.571386	0.816662	0.719303	-0.475328	-0.19259	1	translational_only	NA	NA	-1	2	-1	2	947	97	73	0.536431
uc007lbd.2	Ube2z	ENSMUST00000100528	86.5201	257	59.6966	105	52.1822	168	43.1692	103	65.5306	891	63.2134	868	29.8501	560	30.0546	448	1.3203	0.944366	1.74814	1.43636	1.3203	0.944366	1.74814	1.43636	0.652124	0.465301	1.40617	0.491768	-1.00621	1.01582e-09	both	0.137956	0.999545	1	2	-1	-1	3974	90	2813	0.48465
uc007lcj.2	Snx11	ENSMUST00000021246	13.3391	30	8.2599	11	6.15356	15	8.3033	15	13.9879	144	14.3224	149	8.08844	115	10.0028	113	0.953621	0.576711	0.760785	0.8301	0.953621	0.576711	0.760785	0.8301	0.669329	0.639033	1.03957	0.0559841	-0.555015	0.0350296	both	NA	NA	-1	2	-1	-1	2521	208	1497	0.554542
uc007lcl.1	Cbx1	ENSMUST00000093943	25.1464	35	18.4036	16	19.3021	29	14.0263	16	10.3681	58	9.64993	55	18.8445	122	8.7129	52			1.02428		2.42536	1.90712	1.02428	1.60983	0.76529	1.37663	0.607992	-0.717876	0.385241	0.84369	translational_only	NA	NA	-1	2	1	2	1274	255	461	0.430141
uc007lcr.2	Nfe2l1	ENSMUST00000081775	55.2223	344	58.0157	214	59.9302	405	61.9261	310	50.6039	1439	49.6877	1429	49.4453	1941	39.573	1236	1.09126	1.16761	1.21205	1.56486	1.09126	1.16761	1.21205	1.56486	1.07611	0.887595	1.22933	0.297875	-0.0728059	1	translational_only	0.556941	0.999545	1	2	-1	2	4654	666	1762	0.534594
uc007lcu.1	Copz2	ENSMUST00000018816	76.7673	129	41.0664	41	16.4164	30	17.6914	24	88.0468	659	92.8564	702	20.5854	215	21.9236	181	0.871893	0.442257	0.797476	0.80696	0.871893	0.442257	0.797476	0.80696	0.289457	0.234982	1.22089	0.287937	-1.98019	4.74772e-31	both	0.537318	0.999545	1	2	-1	-1	929	19	292	0.528525
uc007lcv.2	Cdk5rap3	ENSMUST00000103152	17.1388	72	13.6403	34	8.11508	37	7.68948	26	16.1373	303	18.002	338	12.8622	334	9.37038	196	1.06206	0.757712	0.630927	0.820616	1.06206	0.757712	0.630927	0.820616	0.513484	0.65123	0.797651	-0.32617	-0.495559	0.0560347	translational_only	0.130038	0.999545	-1	2	-1	2	2269	125	632	0.557074
uc007ldf.1	Sp2	ENSMUST00000107626	14.7529	76	12.1295	37	13.4324	75	16.1917	67	10.2627	242	10.1847	243	8.47953	276	9.64391	249	1.43753	1.19095	1.5841	1.67895	1.43753	1.19095	1.5841	1.67895	1.10199	0.886346	1.24142	0.311994	-0.081488	1	translational_only	0.42847	0.999545	1	2	-1	2	3035	61	1132	0.555189
uc007ldk.2	Scrn2	ENSMUST00000021249	5.90551	21	10.4481	22	6.74591	26	9.80278	28	12.6557	206	12.9329	213	11.1742	251	13.3457	238	0.466626	0.80787	0.603702	0.734526	0.466626	0.80787	0.603702	0.734526	1.01193	0.958237	1.05	0.0703958	0.0300998	1	translational_only	0.788586	0.999545	-1	2	1	2	1518	104	136	0.602767
uc007ldm.1	Mrpl10	ENSMUST00000001485	29.9066	61	28.8854	36	22.8253	52	24.0895	41	42.7745	334	39.7432	314	19.9634	221	26.4595	238	0.69917	0.726802	1.14336	0.91043	0.69917	0.726802	1.14336	0.91043	0.797979	0.562582	1.44027	0.52634	-0.682289	0.00317612	both	0.213652	0.999545	1	2	-1	-1	1682	15	878	0.469679
uc007ldo.2	Osbpl7	ENSMUST00000090020	2.09309	17	1.24758	6	2.61365	23	0.919697	6	3.01364	112	2.65838	100	1.8119	93	2.6963	110	0.694539				0.694539	0.469299	1.44249	0.341096	1.05768	0.794813	1.5325	0.615891	-0.246217	1	translational_only	NA	NA	-1	2	-1	2	3771	25	854	0.582604
uc007ldu.1	Kpnb1	ENSMUST00000001479	328.79	2423	227.753	995	282.194	2254	234.38	1389	89.8382	3027	81.4319	2773	104.667	4850	85.6237	3161	3.6598	2.79686	2.69613	2.73733	3.6598	2.79686	2.69613	2.73733	0.928184	1.11105	0.841527	-0.248919	0.246062	0.545486	translational_only	0.198917	0.999545	-1	2	1	2	5909	307	2971	0.469961
uc007ldv.2	Npepps	ENSMUST00000001480	33.2602	258	27.6494	127	38.6561	325	26.9827	168	17.578	623	18.5859	667	23.9785	1172	15.3645	598	1.89215	1.48765	1.61212	1.75617	1.89215	1.48765	1.61212	1.75617	1.07764	1.08791	0.996593	-0.00492382	0.220439	1	translational_only	0.740147	0.999545	-1	2	1	2	4141	118	1260	0.458102
uc007ldx.2	Mrpl45	ENSMUST00000019026	7.73761	19	6.05715	9	3.81003	10	3.02457	6	13.5308	123	10.4318	98	11.5831	139	12.548	120	0.571851		0.328929		0.571851	0.580645	0.328929	0.24104	0.495449	1.00703	0.494551	-1.01581	0.0285527	1	translational_only	NA	NA	-1	2	1	2	2431	158	1352	0.364048
uc007lec.1	Arhgap23	ENSMUST00000107601	27.4409	296	30.3728	194	17.1922	201	19.2742	167	20.9011	1032	22.9647	1147	10.4173	710	12.9747	703	1.31289	1.32258	1.65036	1.48552	1.31289	1.32258	1.65036	1.48552	0.630757	0.533262	1.18987	0.250806	-0.811306	1.55345e-05	both	0.546988	0.999545	1	2	-1	-1	5450	341	1275	0.588624
uc007leg.1	E130012A19Rik	ENSMUST00000052281	6.49195	20	6.57813	12	1.79691	6	4.84931	12	8.72234	123	7.84948	112	4.05633	79	4.45892	69	0.74429				0.74429	0.838034	0.442989	1.08755	0.508506	0.513839	0.967273	-0.0480045	-0.866336	0.000441316	both	NA	NA	-1	2	-1	-1	2330	435	785	0.650215
uc007lei.1	Mllt6	ENSMUST00000044730	8.01632	73	14.4652	78	12.5633	124	11.4838	84	6.57742	274	7.01813	296	5.00894	288	5.80061	265	1.21876	2.06111	2.50817	1.97975	1.21876	2.06111	2.50817	1.97975	1.06964	0.79508	1.36832	0.452408	-0.237594	0.693056	translational_only	0.0956299	0.964208	1	2	-1	2	7271	160	3871	0.519186
uc007lem.2	Pcgf2	ENSMUST00000169807	23.8463	68	23.0969	39	14.5598	45	17.8999	41	41.2937	539	42.3255	559	22.6326	408	24.2258	347	0.577481	0.545697	0.643311	0.738877	0.577481	0.545697	0.643311	0.738877	0.691466	0.560377	1.2306	0.299367	-0.738919	3.76431e-05	both	0.742872	0.999545	1	2	-1	-1	2347	154	1164	0.524499
uc007leq.1	Pip4k2b	ENSMUST00000018691	27.6117	96	24.7522	51	18.2956	69	16.1134	45	22.9843	364	20.7472	333	11.1375	244	11.2322	196	1.20133	1.19304	1.6427	1.43457	1.20133	1.19304	1.6427	1.43457	0.657113	0.511525	1.28521	0.362004	-0.866584	5.63343e-06	both	0.348863	0.999545	1	2	-1	-1	5053	100	3702	0.520087
uc007ler.2	Cwc25	ENSMUST00000018685	10.0749	35	4.36804	9	5.30307	20	7.15569	20	5.14831	82	3.78508	61	5.69175	125	3.72195	65			0.931712		1.95694	1.15401	0.931712	1.92257	0.862616	1.05376	0.917492	-0.124233	0.182979	1	translational_only	NA	NA	-1	2	1	2	3307	171	1885	0.42788
uc007lew.1	Lasp1	ENSMUST00000043843	26.5417	44	20.3712	23	13.1933	25	13.3154	20	20.3223	110	18.5695	109	9.64485	79	11.9785	80	1.30604	1.09703			1.30604	1.09703	1.36791	1.11161	0.565063	0.555987	1.03182	0.0451876	-0.655295	0.0199239	both	NA	NA	-1	2	-1	-1	3433	122	2519	0.526944
uc007lfq.1	Med1	ENSMUST00000107545	21.6374	288	17.1214	135	15.5205	224	16.2714	174	9.44167	575	9.49362	585	7.8282	658	7.49672	501	2.2917	1.80346	1.98264	2.17046	2.2917	1.80346	1.98264	2.17046	0.820248	0.809332	1.01415	0.0202699	-0.207389	0.707454	translational_only	0.850841	0.999545	-1	2	-1	2	6518	210	1580	0.480055
uc007lft.2	Cdk12	ENSMUST00000107539	13.5987	170	12.2849	91	13.016	176	14.0545	141	8.00402	452	7.44734	427	7.59445	590	7.66188	476	1.69899	1.64957	1.71388	1.83434	1.69899	1.64957	1.71388	1.83434	1.04585	0.987377	1.05963	0.0835553	0.0755148	1	translational_only	0.992022	0.999713	1	2	1	2	7669	63	3151	0.434868
uc007lgc.2	Stard3	ENSMUST00000018311	9.37276	35	8.59269	19	8.64762	35	12.002	36	22.2313	380	19.89	344	13.4384	317	14.8744	279	0.421601	0.43201	0.643499	0.806893	0.421601	0.43201	0.643499	0.806893	1.14941	0.672172	1.69913	0.764792	-0.478228	0.0330083	both	0.140203	0.999545	1	2	-1	-1	2083	192	550	0.570331
uc007lgi.1	Erbb2	ENSMUST00000058295	22.8299	242	23.4011	147	12.7044	146	13.8551	118	21.9101	1056	24.2462	1184	12.3075	821	13.6073	722	1.04198	0.965145	1.03226	1.01821	1.04198	0.965145	1.03226	1.01821	0.574496	0.561457	1.02159	0.0308178	-0.732836	3.03083e-05	both	0.742026	0.999545	-1	2	-1	-1	4998	179	1048	0.571429
uc007lgj.1	Mien1	ENSMUST00000002655	16.215	15	5.47675	3	23.9368	24	17.4953	13	31.7984	133	33.8166	144	31.3546	180	37.3587	172	0.509931	0.161954	0.763421	0.468306	0.509931	0.161954	0.763421	0.468306	1.91004	1.04722	1.83324	0.874395	0.152467	1	translational_only	NA	NA	-1	2	1	2	744	42	354	0.541667
uc007lgx.1	Psmd3	ENSMUST00000017365	155.156	690	116.963	308	177.385	855	162.089	579	177.76	3607	173.065	3551	183.605	5129	214.533	4777	0.872844	0.675831	0.966118	0.75554	0.872844	0.675831	0.966118	0.75554	1.24752	1.13487	1.1117	0.152765	0.277908	0.317153	translational_only	0.95469	0.999545	1	2	1	2	2147	176	378	0.583139
uc007lha.1	Med24	ENSMUST00000017354	18.1368	151	17.6473	87	18.0634	163	14.5047	97	22.1467	844	22.4324	865	19.6142	1032	22.9234	958	0.818939	0.786687	0.920934	0.632745	0.818939	0.786687	0.920934	0.632745	0.910128	0.954206	0.967647	-0.0474472	0.0279798	1	translational_only	0.53857	0.999545	-1	2	1	2	3410	137	309	0.554545
uc007lhj.2	Msl1	ENSMUST00000037915	20.2661	104	27.5674	84	20.1143	112	20.0473	83	25.146	563	26.4175	604	16.7971	526	16.8284	418	0.805935	1.04353	1.19749	1.19128	0.805935	1.04353	1.19749	1.19128	0.839613	0.652117	1.2916	0.369159	-0.508698	0.00808615	both	0.40424	0.999545	1	2	-1	-1	4340	62	2427	0.489401
uc007lhz.2	Rara	ENSMUST00000107473	37.5939	144	33.8237	77	15.6105	65	21.064	65	35.6377	623	34.0027	601	15.6796	378	18.4287	353	1.05489	0.994735	0.995589	1.143	1.05489	0.994735	0.995589	1.143	0.513521	0.489777	1.04341	0.0613003	-0.936592	2.4024e-07	both	0.816454	0.999545	-1	2	-1	-1	3179	494	1305	0.57754
uc007lid.1	Top2a	ENSMUST00000068031	63.4607	791	38.141	287	60.7942	820	47.2247	480	23.9913	1357	21.8537	1253	39.3898	2977	25.8704	1587	2.64516	1.74529	1.5434	1.82543	2.64516	1.74529	1.5434	1.82543	1.06316	1.4235	0.767309	-0.38212	0.571147	0.02539	both	0.0907438	0.956111	-1	2	1	1	5217	123	507	0.433391
uc007lie.1	Igfbp4	ENSMUST00000017637	108.327	228	91.4706	114	84.1648	192	82.8098	140	117.864	1134	123.818	1207	53.3535	708	69.0492	730	0.919083	0.738748	1.57749	1.19929	0.919083	0.738748	1.57749	1.19929	0.83572	0.506462	1.67495	0.744115	-0.886702	3.08214e-06	both	0.0302244	0.760671	1	1	-1	-1	2066	237	1064	0.556147
uc007lkm.3	Krt19	ENSMUST00000007317	81.7609	269	57.3128	113	103.396	363	88.3927	234	105.212	1421	107.848	1471	147.383	2591	170.686	2423	0.777106	0.531421	0.701545	0.517869	0.777106	0.531421	0.701545	0.517869	1.37904	1.49286	0.931898	-0.101755	0.603532	0.000872132	both	0.553105	0.999545	-1	2	1	1	1381	67	102	0.577118
uc007lkz.2	Jup	ENSMUST00000001592	42.4443	262	41.2824	152	15.6783	106	13.771	69	26.0438	718	25.6212	710	6.11456	235	8.03617	247	1.62973	1.61126	2.5641	1.71363	1.62973	1.61126	2.5641	1.71363	0.351732	0.273894	1.31988	0.40041	-1.75277	9.93793e-21	both	0.226699	0.999545	1	2	-1	-1	5009	163	2608	0.561789
uc007lla.1	P3h4	ENSMUST00000066489	110.414	407	81.2385	178	58.9799	236	53.3219	158	261.786	4373	276.103	4645	104.26	2396	119.782	2194	0.421772	0.294232	0.5657	0.445157	0.421772	0.294232	0.5657	0.445157	0.585967	0.416521	1.4118	0.49754	-1.16608	3.68379e-13	both	0.438542	0.999545	1	2	-1	-1	1867	163	372	0.51955
uc007llb.2	Fkbp10	ENSMUST00000001595	235.863	1151	192.413	556	190.2	1006	179.857	705	265.901	5912	295.998	6659	223.433	6813	246.451	5999	0.887032	0.650048	0.851262	0.729787	0.887032	0.650048	0.851262	0.729787	0.864062	0.836242	1.02861	0.0406895	-0.166787	0.95765	translational_only	0.768805	0.999545	-1	2	-1	2	2603	90	767	0.574337
uc007llf.2	Nt5c3b	ENSMUST00000092688	37.2724	93	18.9513	28	30.691	83	20.9559	42	62.8654	718	64.0345	740	46.5753	733	55.2934	693	0.592892	0.295954	0.658956	0.378995	0.592892	0.295954	0.658956	0.378995	0.918598	0.802748	1.16775	0.223732	-0.222602	0.677445	translational_only	0.883775	0.999545	1	2	-1	2	1493	127	463	0.514401
uc007llj.1	Klhl11	ENSMUST00000056665	24.1357	144	14.7189	52	18.2477	118	17.7365	85	8.75139	239	9.48147	262	8.8288	333	7.37436	221	2.75792	1.55239	2.06684	2.40516	2.75792	1.55239	2.06684	2.40516	0.926125	0.888679	1.03751	0.0531278	-0.068514	1	translational_only	0.931772	0.999545	1	2	-1	2	2436	54	252	0.480706
uc007llm.2	Acly	ENSMUST00000107389	82.1036	763	63.2402	348	68.7026	692	63.0975	471	49.1622	2090	46.5277	2002	39.8327	2338	41.1655	1921	1.67006	1.35919	1.72478	1.53278	1.67006	1.35919	1.72478	1.53278	0.906815	0.846465	1.07537	0.104829	-0.143466	1	translational_only	0.903773	0.999545	1	2	-1	2	4427	229	892	0.521346
uc007lls.1	Dnajc7	ENSMUST00000014339	51.4294	213	28.9512	71	56.5842	254	42.9854	143	16.4577	312	13.6066	261	36.7162	960	20.6018	428	3.12494	2.12773	1.54112	2.08649	3.12494	2.12773	1.54112	2.08649	1.23873	1.90651	0.690622	-0.534032	1.02865	0.000437172	both	0.0139291	0.59654	-1	-1	1	1	2312	564	263	0.507785
uc007llu.1	Nkiras2	ENSMUST00000017981	16.5597	26	12.9074	12	17.6291	30	10.3081	13	24.6284	177	24.4781	178	11.1831	111	14.3283	113	0.672384	0.527303	1.5764		0.672384	0.527303	1.5764	0.71942	0.94808	0.519512	1.91368	0.936353	-0.855639	0.000213793	both	NA	NA	-1	2	-1	-1	2013	68	1369	0.563338
uc007lma.2	Kat2a	ENSMUST00000103118	31.1984	218	25.8605	107	28.6295	217	32.4266	182	34.6007	1104	36.6892	1184	34.4954	1517	41.4196	1452	0.901672	0.704852	0.829951	0.782879	0.901672	0.704852	0.829951	0.782879	1.07005	1.06488	1.00393	0.00565202	0.187341	0.899912	translational_only	0.661645	0.999545	-1	2	1	2	3048	63	492	0.552493
uc007lmh.1	Ghdc	ENSMUST00000017891	5.15222	23	8.70654	23	7.86375	38	11.713	42	9.31008	190	10.0373	207	10.7995	304	10.9539	245	0.553402	0.867419	0.72816	1.0693	0.553402	0.867419	0.72816	1.0693	1.41259	1.12436	1.26508	0.339233	0.265496	0.524364	translational_only	0.66227	0.999545	1	2	1	2	2162	92	471	0.52914
uc007lmj.2	Stat5b	ENSMUST00000004143	5.2498	33	6.53994	25	5.08004	35	4.26316	22	4.04238	106	4.31156	114	3.32092	123	3.61064	106	1.29869	1.51684	1.52971	1.18072	1.29869	1.51684	1.52971	1.18072	0.792486	0.829736	0.962671	-0.0548857	-0.14158	1	translational_only	NA	NA	-1	2	-1	2	4923	197	2365	0.539305
uc007lmp.2	Stat3	ENSMUST00000127638	38.2481	248	32.0361	123	42.9729	302	33.4088	174	18.1248	537	17.7796	533	14.2233	582	17.2863	563	2.11026	1.80185	3.0213	1.93267	2.11026	1.80185	3.0213	1.93267	1.08675	0.877597	1.26632	0.34064	-0.0918073	1	translational_only	0.226935	0.999545	1	2	-1	2	4520	308	1899	0.525664
uc007lmr.2	Ptrf	ENSMUST00000060792	1031.74	3377	851.63	1652	463.416	1644	395.231	1040	510.398	7561	535.191	8008	202.701	4158	217.051	3550	2.02144	1.59126	2.28621	1.82091	2.02144	1.59126	2.28621	1.82091	0.455909	0.40145	1.13685	0.185047	-1.21147	1.9997e-15	both	0.607994	0.999545	1	2	-1	-1	3218	151	1888	0.543195
uc007lmx.2	Atp6v0a1	ENSMUST00000044721	19.9766	141	16.4828	69	24.4343	187	23.4495	133	14.2248	457	13.6949	445	12.0801	536	13.0921	461	1.40435	1.20358	2.02268	1.79112	1.40435	1.20358	2.02268	1.79112	1.31334	0.901594	1.46239	0.548326	-0.0537422	1	translational_only	0.0745878	0.93535	1	2	-1	2	4009	177	1312	0.523821
uc007lna.2	Naglu	ENSMUST00000001802	15.2711	95	11.6733	43	6.67405	45	5.6035	28	16.6108	473	15.695	452	8.36574	329	8.54466	267	0.919348	0.743757	0.797783	0.65579	0.919348	0.743757	0.797783	0.65579	0.455662	0.523447	0.874012	-0.194276	-0.836266	3.68978e-06	both	0.327811	0.999545	-1	2	-1	-1	2477	31	226	0.595478
uc007lne.2	Mlx	ENSMUST00000017945	16.1409	40	12.9479	19	17.126	46	20.0947	40	30.0955	341	25.615	294	24.0917	377	29.9649	373	0.536323	0.505481	0.710868	0.670608	0.536323	0.505481	0.710868	0.670608	1.27955	0.970313	1.32604	0.407126	0.050546	1	translational_only	0.569447	0.999545	1	2	1	2	1975	36	1042	0.499241
uc007lnh.2	Psmc3ip	ENSMUST00000019447	20.6619	37	6.60152	7	11.335	22	12.514	18	33.6025	275	36.1081	299	23.4169	263	24.9031	224	0.614893	0.182826	0.484051	0.502507	0.614893	0.182826	0.484051	0.502507	0.874759	0.693151	1.23672	0.306523	-0.4358	0.0612553	translational_only	0.579951	0.999545	1	2	-1	2	972	59	259	0.502058
uc007lni.1	Fam134c	ENSMUST00000107295	19.7522	77	12.1123	28	16.5673	70	16.2754	51	16.0838	287	17.5102	315	11.6711	287	10.7245	210	1.22808	0.691732	1.41951	1.51759	1.22808	0.691732	1.41951	1.51759	1.0307	0.666657	1.52989	0.613427	-0.483753	0.0282648	both	0.0741008	0.93535	1	2	-1	-1	3306	64	1841	0.524501
uc007lnk.1	Tubg1	ENSMUST00000043680	22.2894	78	9.73314	21	19.1076	73	15.6926	46	39.4644	440	36.883	404	28.3334	415	33.9848	410	0.564797	0.263892	0.674387	0.461753	0.564797	0.263892	0.674387	0.461753	1.08674	0.816245	1.37101	0.455236	-0.221982	0.813715	translational_only	0.250496	0.999545	1	2	-1	2	1609	63	190	0.568676
uc007lnq.2	Plekhh3	ENSMUST00000043397	11.932	80	9.82349	39	9.7704	71	9.84134	53	16.3573	502	16.5848	515	9.88969	419	11.432	385	0.729463	0.592319	0.987937	0.860861	0.729463	0.592319	0.987937	0.860861	0.90146	0.647247	1.39872	0.484102	-0.53258	0.00841007	both	0.299285	0.999545	1	2	-1	-1	3006	416	199	0.629408
uc007lny.1	Ramp2	ENSMUST00000129680	8.38564	13	4.36538	4	7.12871	12	4.00797	5	18.1457	129	16.6039	119	7.12951	70	9.50298	74	0.462128				0.462128	0.262913	0.999888	0.421759	0.873396	0.478638	1.96078	0.971429	-0.976101	0.000121084	both	NA	NA	-1	2	-1	-1	872	118	184	0.550459
uc007loe.2	Wnk4	ENSMUST00000103108	3.68215	38	4.74562	29	4.2913	48	3.98094	33	3.07288	145	3.03447	145	2.97931	194	3.28216	170	1.19827	1.5639	1.44037	1.2129	1.19827	1.5639	1.44037	1.2129	0.981545	1.02523	0.960572	-0.0580343	0.129524	1	translational_only	NA	NA	-1	2	1	2	4148	105	374	0.591128
uc007log.1	Coa3	ENSMUST00000017332	42.7419	37	19.5087	10	45.8299	43	50.3354	35	79.496	315	79.0658	317	82.3153	449	90.9086	394	0.537661	0.24674	0.556761	0.553692	0.537661	0.24674	0.556761	0.553692	1.54481	1.09247	1.41567	0.501485	0.218711	0.721882	translational_only	0.431372	0.999545	1	2	1	2	718	21	370	0.537604
uc007loj.1	Becn1	ENSMUST00000130916	20.7933	78	18.4582	41	31.7284	129	26.8824	81	21.6648	372	20.4332	355	42.9699	1019	21.6534	408	0.959774	0.903346	0.738387	1.24149	0.959774	0.903346	0.738387	1.24149	1.49321	1.53507	1.06267	0.0876887	0.718602	0.0450974	both	0.674834	0.999545	-1	2	1	1	2031	138	546	0.492861
uc007lon.1	Psme3	ENSMUST00000019470	99.7745	210	57.7709	72	60.0551	137	50.2774	85	74.1107	714	70.6725	688	53.5765	710	59.2917	626	1.34629	0.817445	1.12092	0.847966	1.34629	0.817445	1.12092	0.847966	0.700322	0.779567	0.909949	-0.136142	-0.265818	0.403876	translational_only	0.459033	0.999545	-1	2	-1	2	2619	196	1658	0.452845
uc007los.1	Aarsd1	ENSMUST00000070395	43.2426	149	29.4072	60	28.3832	106	26.3756	73	42.8321	675	43.0214	686	39.7562	866	32.5867	564	1.00959	0.683548	0.713931	0.809397	1.00959	0.683548	0.713931	0.809397	0.753736	0.842632	0.899709	-0.152469	-0.146159	1	translational_only	0.348422	0.999545	-1	2	-1	2	1333	45	49	0.567892
uc007lov.2	Rundc1	ENSMUST00000040561	6.19134	32	6.53493	20	8.74701	49	6.74444	28	7.86195	186	8.52202	204	6.18564	202	6.28197	163	0.787507	0.766829	1.41408	1.07362	0.787507	0.766829	1.41408	1.07362	1.21728	0.760964	1.60049	0.678516	-0.297395	0.438746	translational_only	0.0834109	0.939082	1	2	-1	2	3215	19	1348	0.54028
uc007lox.1	Ifi35	ENSMUST00000010502	15.9911	38	4.97471	7	6.98868	18	6.28678	12	19.0304	207	21.2612	234	7.3223	110	9.4669	113	0.840293	0.233981	0.954439		0.840293	0.233981	0.954439	0.66408	0.633197	0.416693	1.50662	0.591313	-1.17355	6.38061e-08	both	NA	NA	-1	2	-1	-1	1360	190	309	0.498529
uc007loz.1	Vat1	ENSMUST00000040430	177.627	603	126.358	254	153.557	565	118.453	323	133.599	2076	138.959	2183	88.2143	1890	105.648	1800	1.32956	0.90932	1.74073	1.12121	1.32956	0.90932	1.74073	1.12121	0.894816	0.711273	1.27829	0.354214	-0.395787	0.067894	translational_only	0.330325	0.999545	1	2	-1	2	2732	66	1445	0.587116
uc007lpd.2	Brca1	ENSMUST00000017290	3.98277	61	4.07824	37	6.2661	104	7.40237	91	2.97678	208	2.31622	164	3.82214	367	3.01712	231	1.33794	1.76073	1.63942	2.45345	1.33794	1.76073	1.63942	2.45345	1.69563	1.29213	1.32085	0.401463	0.464585	0.120631	translational_only	0.247462	0.999545	1	2	1	2	6648	206	1003	0.458032
uc007lpg.2	Nbr1	ENSMUST00000103099	18.6046	155	12.1582	60	20.1484	182	19.2701	129	7.39218	282	6.37314	246	10.6778	562	8.36357	350	2.51679	1.90772	1.88695	2.30405	2.51679	1.90772	1.88695	2.30405	1.28137	1.38328	0.947224	-0.0782231	0.567242	0.017727	both	0.574826	0.999545	-1	2	1	1	4831	671	1193	0.470296
uc007lpq.2	Arl4d	ENSMUST00000039388	12.085	20	24.4909	24	4.46002	8	3.76132	5	47.1268	357	42.0098	322	4.68354	49	6.37571	53	0.256436	0.58298			0.256436	0.58298	0.952275	0.589945	0.224775	0.124071	1.83725	0.87755	-2.92622	8.49956e-41	both	NA	NA	-1	2	-1	-1	1382	199	577	0.557164
uc007lpr.1	Dhx8	ENSMUST00000039152	14.7564	155	10.4674	65	12.5607	143	10.693	90	8.17722	392	8.29276	403	10.1486	671	8.95351	471	1.80457	1.26224	1.23767	1.19428	1.80457	1.26224	1.23767	1.19428	0.921892	1.15982	0.79299	-0.334625	0.310724	0.269236	translational_only	0.133803	0.999545	-1	2	1	2	4318	85	498	0.486799
uc007lqa.2	Dusp3	ENSMUST00000003612	63.8514	97	35.5734	32	46.7648	77	48.3509	59	34.8014	242	31.9786	225	26.7604	257	36.4997	278	1.83474	1.11241	1.74754	1.32469	1.83474	1.11241	1.74754	1.32469	0.956659	0.947291	1.04244	0.0599655	0.0121018	1	translational_only	0.98847	0.999713	1	2	1	2	4203	55	3590	0.458482
uc007lql.2	Mpp2	ENSMUST00000017458	14.0273	65	7.28896	20	7.5661	38	9.67197	36	5.70463	121	5.59137	120	3.24297	95	3.86667	90	2.45892	1.30361	2.33307		2.45892	1.30361	2.33307	2.50137	0.808684	0.629395	1.28489	0.361645	-0.577323	0.035507	both	NA	NA	-1	2	-1	-1	4087	128	2300	0.559579
uc007lqr.2	Tmem101	ENSMUST00000021296	16.8998	36	5.54948	7	17.7579	41	17.5329	30	18.6652	182	17.1294	169	21.5346	290	20.0933	215	0.905416	0.323974	0.824621	0.872571	0.905416	0.323974	0.824621	0.872571	1.57202	1.16297	1.38051	0.465206	0.316934	0.347238	translational_only	0.322321	0.999545	1	2	1	2	1576	63	739	0.544416
uc007lqt.2	G6pc3	ENSMUST00000078975	33.2693	96	16.9726	29	38.3692	120	36.6729	85	35.578	469	38.311	511	41.2908	751	49.0607	709	0.935111	0.44302	0.929245	0.7475	0.935111	0.44302	0.929245	0.7475	1.49362	1.2228	1.21668	0.28295	0.384755	0.105153	translational_only	0.583019	0.999545	1	2	1	2	1543	227	275	0.565133
uc007lqv.1	Hdac5	ENSMUST00000107152	19.3604	182	20.3001	113	16.1989	165	16.1666	122	31.7914	1347	33.0381	1422	26.0643	1521	31.8218	1480	0.608981	0.614444	0.621499	0.508034	0.608981	0.614444	0.621499	0.508034	0.816064	0.892897	0.923255	-0.1152	-0.0712708	1	translational_only	0.398979	0.999545	-1	2	-1	2	3798	368	82	0.568194
uc007lqz.1	BC030867	ENSMUST00000100392	8.12613	42	6.20818	19	5.1768	29	5.78095	24	10.3558	245	9.06509	217	6.36588	208	5.00741	130	0.784694	0.684845	0.81321	1.15448	0.784694	0.684845	0.81321	1.15448	0.764442	0.585622	1.33898	0.421138	-0.667478	0.00477466	both	NA	NA	-1	2	-1	-1	2543	208	487	0.561148
uc007lrg.1	Atxn7l3	ENSMUST00000107132	17.268	51	22.3004	39	19.9932	64	17.7042	42	27.1991	367	24.0748	329	10.8725	203	16.9355	251	0.634876	0.926299	1.83888	1.04539	0.634876	0.926299	1.83888	1.04539	0.952711	0.542343	1.8475	0.885571	-0.791271	0.00232653	both	0.0116135	0.591055	1	1	-1	-1	3707	287	2355	0.537632
uc007lrt.3	Slc25a39	ENSMUST00000018821	50.4021	150	54.1159	96	49.3397	159	61.6771	148	169.423	2229	164.793	2211	111.942	2032	142.468	2069	0.297493	0.328386	0.440763	0.432918	0.297493	0.328386	0.440763	0.432918	1.06218	0.761214	1.39593	0.481223	-0.298571	0.330613	translational_only	0.558191	0.999545	1	2	-1	2	1667	143	444	0.556089
uc007lrv.2	Grn	ENSMUST00000049460	117.434	594	96.4894	289	111.449	611	98.6969	401	91.5287	2118	99.7994	2338	96.8725	3089	101.642	2581	1.28302	0.966834	1.15047	0.971027	1.28302	0.966834	1.15047	0.971027	0.982343	1.03756	0.942947	-0.0847514	0.148912	1	translational_only	0.516435	0.999545	-1	2	1	2	2333	187	337	0.548221
uc007lrw.2	Fam171a2	ENSMUST00000049057	17.3278	120	18.7771	77	7.59391	57	10.0671	56	25.3522	803	25.659	823	10.4157	456	12.4188	432	0.683483	0.731795	0.729085	0.810629	0.683483	0.731795	0.729085	0.810629	0.489158	0.447638	1.08792	0.121576	-1.06384	1.32353e-09	both	0.909696	0.999545	-1	2	-1	-1	3099	148	482	0.631817
uc007lsg.1	Ccdc43	ENSMUST00000092569	20.8256	38	9.24096	10	23.7284	47	20.4369	30	12.5065	103	11.9815	100	16.6672	186	13.4258	120	1.66518		1.42366	1.52221	1.66518	0.771268	1.42366	1.52221	1.46892	1.22889	1.20908	0.273915	0.377844	0.325424	translational_only	NA	NA	-1	2	1	2	2307	17	1621	0.372779
uc007lsm.2	Gjc1	ENSMUST00000068933	14.8041	49	13.7761	27	17.8401	64	14.6692	39	17.4911	265	18.1999	279	17.396	364	14.3275	238	0.846384	0.756934	1.02553	1.02384	0.846384	0.756934	1.02553	1.02384	1.13747	0.888839	1.27821	0.35412	-0.0688491	1	translational_only	0.516653	0.999545	1	2	-1	2	1984	286	507	0.449093
uc007lsy.2	Kif18b	ENSMUST00000021311	18.1019	127	13.2232	55	14.8663	113	14.3618	81	16.602	528	15.8889	514	10.979	484	12.3382	432	1.09034	0.832229	1.35407	1.16401	1.09034	0.832229	1.35407	1.16401	0.933059	0.717653	1.30975	0.389289	-0.381632	0.100532	translational_only	0.338092	0.999545	1	2	-1	2	3336	150	681	0.54946
uc007ltc.1	Dcakd	ENSMUST00000021313	57.6907	110	39.916	45	66.8754	138	52.8873	81	48.9945	420	49.0888	429	40.4443	481	51.9599	491	1.17749	0.813139	1.65352	1.01785	1.17749	0.813139	1.65352	1.01785	1.22699	0.9421	1.34197	0.424351	0.00945906	1	translational_only	0.266459	0.999545	1	2	1	2	1714	193	825	0.555426
uc007ltd.1	Nmt1	ENSMUST00000021314	77.218	315	49.9862	122	71.442	315	56.451	186	78.5805	1333	81.178	1421	100.56	2284	87.0804	1621	0.982661	0.61576	0.71044	0.648263	0.982661	0.61576	0.71044	0.648263	1.00542	1.17453	0.850028	-0.234417	0.292127	0.25828	translational_only	0.302853	0.999545	-1	2	1	2	1838	10	337	0.503808
uc007ltf.2	Plcd3	ENSMUST00000103077	11.798	78	8.42956	33	10.3314	74	9.03876	48	12.8873	389	12.5407	384	14.7512	616	17.1032	567	0.915474	0.672173	0.700379	0.528484	0.915474	0.672173	0.700379	0.528484	0.957614	1.25273	0.774016	-0.369566	0.420651	0.0619754	translational_only	0.117661	0.999545	-1	2	1	2	3031	128	545	0.592214
uc007lto.1	Hexim1	ENSMUST00000053063	18.8526	56	17.0562	30	17.3941	56	19.2795	46	23.852	324	28.0842	386	20.2022	379	22.0924	329	0.790399	0.607322	0.861	0.872673	0.790399	0.607322	0.861	0.872673	1.0213	0.814355	1.24036	0.310756	-0.200499	0.915053	translational_only	0.638081	0.999545	1	2	-1	2	3400	597	1732	0.483824
uc007ltv.1	Fmnl1	ENSMUST00000042286	0.108432	1	0.183062	1	9.60703	96	8.37723	62	0.451606	19	0.704079	30	7.44624	432	7.1761	331			1.29019	1.16738	0.240103	0.260002	1.29019	1.16738	61.6968	12.6525	4.9141	2.29693	3.74967	5.82723e-57	both	NA	NA	-1	2	1	1	3774	175	314	0.567833
uc007lua.1	Map3k14	ENSMUST00000021324	4.78365	38	7.01562	33	6.62033	57	5.79871	37	7.48045	272	6.52326	240	4.68122	235	5.68902	227	0.639487	1.07548	1.41423	1.01928	0.639487	1.07548	1.41423	1.01928	1.05253	0.740535	1.41899	0.504861	-0.340579	0.321973	translational_only	0.178528	0.999545	1	2	-1	2	4173	83	1261	0.583753
uc007lug.1	Plekhm1	ENSMUST00000041272	7.61254	69	4.09902	22	7.32896	72	5.90612	43	4.19385	174	4.69418	197	2.91901	167	3.44839	157	1.81517	0.873212	2.51076	1.71272	1.81517	0.873212	2.51076	1.71272	1.13009	0.716402	1.57101	0.651696	-0.389097	0.207591	translational_only	0.0201398	0.644522	1	1	-1	2	5128	113	1790	0.553822
uc007lvo.2	Gosr2	ENSMUST00000021329	46.9028	82	30.9108	32	32.1917	61	21.3629	30	67.9627	543	60.5144	490	42.8657	473	46.574	409	0.690125	0.510802	0.750989	0.458686	0.690125	0.510802	0.750989	0.458686	0.688241	0.696153	1.00728	0.0104712	-0.426346	0.0560096	translational_only	0.651113	0.999545	-1	2	-1	2	3078	52	2387	0.496101
uc007lvt.1	Nsf	ENSMUST00000103075	38.6377	242	25.3454	94	23.4219	159	18.8831	95	16.5407	474	17.451	506	9.42031	373	9.66284	304	2.33592	1.45238	2.48632	1.95419	2.33592	1.45238	2.48632	1.95419	0.661189	0.561407	1.17217	0.229176	-0.734744	4.79917e-05	both	0.438129	0.999545	1	2	-1	-1	3765	75	1455	0.487915
uc007lwj.1	Kansl1	ENSMUST00000106977	18.3035	160	14.6827	76	14.4599	137	16.0934	113	13.9499	558	13.2928	538	10.6765	590	11.6606	512	1.31209	1.10456	1.35437	1.38015	1.31209	1.10456	1.35437	1.38015	0.926243	0.819928	1.13153	0.17828	-0.189674	0.877386	translational_only	0.797426	0.999545	1	2	-1	2	5510	650	1749	0.48657
uc007lwq.2	Cdc27	ENSMUST00000093923	29.0616	202	16.5216	68	19.6453	148	13.9706	78	10.0263	319	9.53639	307	7.32799	322	6.30124	220	2.89853	1.73248	2.68086	2.21712	2.89853	1.73248	2.68086	2.21712	0.737463	0.696694	1.05765	0.0808593	-0.420248	0.0848546	translational_only	0.804502	0.999545	1	2	-1	2	5781	231	3072	0.39232
uc007lxa.2	Mettl2	ENSMUST00000021030	13.8441	45	10.4001	20	12.2266	43	9.19216	24	17.1161	254	18.312	274	15.7034	321	14.8381	241	0.808836	0.56794	0.7786	0.619496	0.808836	0.56794	0.7786	0.619496	0.88346	0.862071	1.01549	0.0221693	-0.116129	1	translational_only	0.708842	0.999545	-1	2	-1	2	2619	72	1377	0.329897
uc007lxi.1	Mrc2	ENSMUST00000100335	18.9582	237	20.3987	151	19.558	265	17.0294	171	15.4414	883	15.2402	882	15.5708	1230	16.9763	1066	1.22775	1.33848	1.25607	1.00313	1.22775	1.33848	1.25607	1.00313	0.92963	1.0608	0.880357	-0.183839	0.182506	0.865992	translational_only	0.311234	0.999545	-1	2	1	2	5801	141	1220	0.582658
uc007lxm.1	Tanc2	ENSMUST00000100330	3.2604	55	3.1045	31	2.8436	52	3.32104	45	1.80105	139	1.90934	149	1.56782	167	1.58355	134	1.81028	1.62596	1.81373	2.09721	1.81028	1.62596	1.81373	2.09721	0.968536	0.849338	1.13814	0.186684	-0.138673	1	translational_only	NA	NA	-1	2	-1	2	11859	287	5587	0.474661
uc007lxz.1	Dcaf7	ENSMUST00000058438	75.3965	215	53.8927	91	76.3578	236	72.0361	165	30.7518	401	30.5894	404	26.4046	476	29.8702	427	2.45177	1.76181	2.89183	2.41163	2.45177	1.76181	2.89183	2.41163	1.14777	0.917407	1.25866	0.331889	-0.0294909	1	translational_only	0.199216	0.999545	1	2	-1	2	5749	252	4468	0.500087
uc007lyb.1	Taco1	ENSMUST00000002048	13.0921	32	8.98212	13	11.3243	30	9.16822	18	7.41857	83	8.48024	96	7.33002	113	5.30043	65			1.54492		1.76477	1.05918	1.54492	1.72971	0.928344	0.794427	1.15959	0.213613	-0.224036	1	translational_only	NA	NA	-1	2	-1	2	1337	141	311	0.5273
uc007lyc.1	Map3k3	ENSMUST00000002044	13.7946	72	10.6948	33	8.13578	46	11.7385	49	16.5044	377	15.4719	358	8.16033	257	11.2988	289	0.835816	0.691243	0.996992	1.03891	0.835816	0.691243	0.996992	1.03891	0.811546	0.608551	1.33322	0.414915	-0.609709	0.0139228	both	0.405101	0.999545	1	2	-1	-1	3149	28	1240	0.527469
uc007lyd.1	Limd2	ENSMUST00000045923	37.6666	39	26.0969	16	15.1485	17	21.643	18	26.5855	126	26.2748	126	21.8469	143	20.9582	109	1.41681	0.993226	0.693396		1.41681	0.993226	0.693396	1.03268	0.577	0.809776	0.716202	-0.481562	-0.204835	1	translational_only	NA	NA	-1	2	-1	2	2950	145	2418	0.48
uc007lyg.2	Strada	ENSMUST00000007444	10.0122	36	8.91694	19	5.12394	20	4.14839	12	8.26751	135	6.68959	110	5.54201	123	6.57118	117	1.21103	1.33296	0.924563	0.6313	1.21103	1.33296	0.924563	0.6313	0.489844	0.809862	0.611584	-0.709377	-0.225117	1	translational_only	NA	NA	-1	2	-1	2	2543	182	1065	0.500983
uc007lyi.1	Ccdc47	ENSMUST00000002043	20.0431	77	16.2034	38	24.1675	99	29.4245	91	7.06359	119	6.41463	108	18.0873	350	10.0533	174	2.83752	2.526	1.33615	2.92684	2.83752	2.526	1.33615	2.92684	1.47855	2.08786	0.794813	-0.331313	0.971026	0.000731792	both	NA	NA	-1	2	1	1	3268	236	1580	0.425643
uc007lyk.2	Ddx42	ENSMUST00000021046	22.3336	174	16.6304	77	21.7109	183	19.4667	122	7.26886	258	6.49432	234	10.11	488	6.85006	267	3.0725	2.56076	2.14747	2.84183	3.0725	2.56076	2.14747	2.84183	1.05681	1.23228	0.885687	-0.175131	0.388119	0.295254	translational_only	0.328166	0.999545	-1	2	1	2	4012	248	974	0.475075
uc007lym.1	Ftsj3	ENSMUST00000021048	42.2032	298	35.8897	150	68.8602	527	67.1749	381	11.5187	372	11.2221	367	29.4824	1315	18.454	654	3.66389	3.19814	2.33564	3.64013	3.66389	3.19814	2.33564	3.64013	1.74197	2.10795	0.870845	-0.199513	1.17488	1.04801e-06	both	0.213614	0.999545	-1	2	1	1	2865	68	280	0.499127
uc007lyn.1	Psmc5	ENSMUST00000021049	124.604	423	76.6106	154	129.097	475	104.884	286	76.9668	1194	73.7717	1157	149.155	3185	72.8972	1242	1.61893	1.03848	0.865517	1.4388	1.61893	1.03848	0.865517	1.4388	1.16284	1.4731	0.867127	-0.205685	0.655436	0.0802407	translational_only	0.203184	0.999545	-1	2	1	2	1277	6	50	0.51527
uc007lyp.2	Smarcd2	ENSMUST00000021052	32.3188	144	23.8786	63	21.5492	104	17.8824	64	27.2036	552	26.9315	554	16.8816	474	19.4908	434	1.18803	0.886642	1.27649	0.91748	1.18803	0.886642	1.27649	0.91748	0.701662	0.671881	1.0575	0.0806583	-0.478316	0.0217003	both	0.930053	0.999545	-1	2	-1	-1	2755	264	895	0.562613
uc007lyy.1	Ern1	ENSMUST00000001059	4.36853	36	3.8937	19	5.70995	51	7.25149	48	2.57327	97	3.04031	116	3.22923	168	2.63508	109	1.69766	1.28069	1.7682	2.75191	1.69766	1.28069	1.7682	2.75191	1.56876	1.04467	1.51766	0.601846	0.166473	1	translational_only	NA	NA	-1	2	1	2	3976	120	922	0.534457
uc007lzc.1	Tex2	ENSMUST00000042780	6.51105	62	5.32055	30	8.52903	88	9.02114	69	4.81937	210	4.62559	204	4.35491	262	4.10024	196	1.35102	1.15024	1.95849	2.20015	1.35102	1.15024	1.95849	2.20015	1.48333	0.895202	1.66262	0.733456	-0.0610518	1	translational_only	0.0174371	0.617355	1	1	-1	2	4942	98	1457	0.497774
uc007lzx.2	Smurf2	ENSMUST00000103067	24.2963	153	17.1634	64	21.0979	144	20.7582	105	16.1665	466	14.2825	416	12.2465	486	12.2774	388	1.50287	1.20171	1.72277	1.69077	1.50287	1.20171	1.72277	1.69077	1.00956	0.805408	1.26213	0.335861	-0.216938	0.744027	translational_only	0.344628	0.999545	1	2	-1	2	5331	483	2601	0.41737
uc007mac.1	Bptf	ENSMUST00000057892	15.7734	390	17.3489	254	18.4797	495	21.8023	433	11.046	1248	10.0882	1153	13.3985	2089	12.4046	1539	1.42798	1.71972	1.37924	1.7576	1.42798	1.71972	1.37924	1.7576	1.21616	1.22092	0.99655	-0.00498598	0.385626	0.0669436	translational_only	0.666436	0.999545	-1	2	1	2	11488	0	2722	0.465094
uc007mai.2	Nol11	ENSMUST00000018577	30.2378	184	19.7046	71	30.1727	199	23.5279	115	28.1111	783	25.5117	719	26.3179	1011	29.903	914	1.07566	0.772375	1.14647	0.786809	1.07566	0.772375	1.14647	0.786809	1.07525	1.04845	1.04613	0.065064	0.163499	1	translational_only	0.857693	0.999545	-1	2	1	2	3160	124	864	0.402532
uc007mar.1	Psmd12	ENSMUST00000021063	84.0625	317	47.8992	108	92.8674	379	73.5099	224	53.7579	898	57.967	979	109.922	2475	80.8663	1472	1.56372	0.826319	0.844851	0.90903	1.56372	0.826319	0.844851	0.90903	1.2608	1.70766	0.733829	-0.446485	0.847079	1.98231e-05	both	0.0825245	0.939082	-1	2	1	1	1723	49	303	0.444573
uc007mav.1	Helz	ENSMUST00000075012	9.98788	166	9.75633	96	8.49059	153	9.59291	128	5.42297	412	5.14269	396	5.43585	569	5.35802	447	1.84177	1.89713	1.56196	1.79038	1.84177	1.89713	1.56196	1.79038	0.915889	1.0216	0.896613	-0.157443	0.126028	1	translational_only	0.347711	0.999545	-1	2	1	2	6218	96	224	0.513027
uc007mce.1	Gna13	ENSMUST00000020930	29.5107	92	24.7838	46	23.0424	78	24.692	62	16.017	224	15.504	220	10.4197	202	14.5667	225	1.84247	1.59854	2.21142	1.6951	1.84247	1.59854	2.21142	1.6951	0.879176	0.792692	1.13529	0.183055	-0.238964	0.908216	translational_only	0.667666	0.999545	1	2	-1	2	6197	180	4883	0.44812
uc007mch.1	Amz2	ENSMUST00000092500	7.3296	22	5.61058	10	4.58489	15	3.31506	8	28.1034	353	23.561	305	13.6519	240	15.4051	220	0.260808	0.23813	0.335844	0.215192	0.260808	0.23813	0.335844	0.215192	0.610498	0.562418	1.10442	0.143285	-0.712023	0.000754992	both	0.841217	0.999545	-1	2	-1	-1	2816	291	1433	0.440696
uc007mcq.1	Wipi1	ENSMUST00000103060	18.4777	69	17.1854	38	13.095	53	13.0022	39	20.6517	353	15.3223	265	13.4486	317	18.4464	346	0.894729	1.1216	0.973703	0.704866	0.894729	1.1216	0.973703	0.704866	0.73177	0.886612	0.832489	-0.264497	-0.0817797	1	translational_only	0.221432	0.999545	-1	2	-1	2	1817	77	399	0.539351
uc007mcw.1	Fam20a	ENSMUST00000155559	2.86313	13	4.09135	11	3.86083	19	4.11285	15	5.7774	120	7.89376	166	6.7935	195	7.93619	181	0.495574	0.518302	0.568313	0.518239	0.495574	0.518302	0.568313	0.518239	1.14655	1.07743	1.07168	0.0998753	0.202192	1	translational_only	NA	NA	-1	2	1	2	2577	541	410	0.579744
uc007med.2	Sox9	ENSMUST00000000579	7.76635	33	4.76619	12	19.3123	89	15.2865	52	3.25428	63	2.70032	53	9.70158	258	10.5205	222			1.99063	1.45302	2.3865	1.76505	1.99063	1.45302	2.76071	3.39604	0.829486	-0.269711	1.84762	9.45934e-18	both	NA	NA	-1	2	1	1	4146	375	2247	0.47974
uc007men.2	Slc39a11	ENSMUST00000106633	16.482	47	10.6601	18	14.8833	46	16.1535	37	19.3062	252	21.1459	279	15.754	284	14.5215	208	0.853718	0.504122	0.94473	1.11239	0.853718	0.504122	0.94473	1.11239	1.14349	0.748431	1.51499	0.59931	-0.317248	0.308251	translational_only	0.164864	0.999545	1	2	-1	2	2742	151	1562	0.543034
uc007mer.2	Cog1	ENSMUST00000018805	26.1304	216	21.2472	104	12.0544	108	14.4583	96	23.4238	886	23.3751	894	11.5509	603	14.9321	620	1.11555	0.908967	1.04359	0.968272	1.11555	0.908967	1.04359	0.968272	0.559603	0.565889	0.993748	-0.00904842	-0.726084	0.000234684	both	0.670331	0.999545	-1	2	-1	-1	3029	32	54	0.573126
uc007meu.1	Fam104a	ENSMUST00000120194	18.109	25	14.2135	12	16.5385	25	8.57846	10	37.3844	137	37.2172	138	24.768	132	25.5903	104	0.484399	0.381906	0.667734		0.484399	0.381906	0.667734	0.335222	0.777074	0.675031	1.15774	0.211312	-0.423806	0.152942	translational_only	NA	NA	-1	2	-1	2	2615	66	1991	0.523136
uc007mex.1	D11Wsu47e	ENSMUST00000042227	4.69608	22	2.88389	8	4.72665	24	4.78342	18	7.22815	155	6.03756	131	6.71934	199	6.03444	142	0.649693	0.477658	0.703439	0.792687	0.649693	0.477658	0.703439	0.792687	1.25463	0.961409	1.32712	0.408295	0.0438923	1	translational_only	NA	NA	-1	2	1	2	2196	406	113	0.532332
uc007mfb.2	Cdc42ep4	ENSMUST00000106616	22.6726	66	22.6255	39	8.87452	28	9.40879	22	17.7225	235	20.3823	274	6.40131	117	7.36786	107	1.27932	1.11006	1.38636	1.277	1.27932	1.11006	1.38636	1.277	0.403622	0.36135	1.11467	0.156618	-1.37925	1.17227e-11	both	NA	NA	-1	2	-1	-1	3247	533	1664	0.561441
uc007mfm.1	Ttyh2	ENSMUST00000045779	20.6089	92	21.5771	57	33.8953	164	33.4658	120	11.6547	238	11.6563	241	12.5793	355	13.9942	313	1.76829	1.85111	2.69453	2.3914	1.76829	1.85111	2.69453	2.3914	1.59677	1.13995	1.40519	0.490765	0.282907	0.425563	translational_only	0.0673777	0.929969	1	2	1	2	3456	76	1781	0.517361
uc007mgp.1	Slc9a3r1	ENSMUST00000021077	17.4014	51	14.3089	25	22.0577	70	19.5212	46	15.6898	205	14.8885	198	13.9928	252	19.0331	271	1.10909	0.96107	1.57636	1.02564	1.10909	0.96107	1.57636	1.02564	1.31121	1.08004	1.25691	0.329881	0.191617	1	translational_only	0.452549	0.999545	1	2	1	2	1922	185	669	0.585328
uc007mgv.2	Tmem104	ENSMUST00000061450	11.0615	46	12.183	30	8.65266	39	8.38238	28	3.5723	68	4.62087	89	4.10809	108	4.30858	90			2.10625		3.09646	2.63651	2.10625	1.94551	0.732864	1.02728	0.706745	-0.500737	0.134347	1	translational_only	NA	NA	-1	2	1	2	4566	180	2895	0.577092
uc007mgy.1	Fdxr	ENSMUST00000021078	5.79486	24	6.11645	15	6.68317	30	5.11016	17	6.64638	126	6.56871	126	6.11101	160	5.91252	123	0.871882	0.931149	1.09363	0.864294	0.871882	0.931149	1.09363	0.864294	0.990094	0.909833	1.08591	0.118898	-0.0373502	1	translational_only	NA	NA	-1	2	-1	2	1866	82	299	0.599678
uc007mhi.1	Cdr2l	ENSMUST00000053288	17.7128	69	17.7746	41	13.0266	55	14.0619	44	16.9928	303	13.8566	250	8.85874	218	10.6301	208	1.04237	1.28275	1.47048	1.32284	1.04237	1.28275	1.47048	1.32284	0.763328	0.631742	1.20136	0.264672	-0.56985	0.0205279	both	0.559242	0.999545	1	2	-1	-1	3700	407	1895	0.561081
uc007mhl.1	Ict1	ENSMUST00000103036	36.5201	53	24.4372	21	23.5227	37	14.5834	17	57.2034	380	47.2542	317	35.3152	324	44.0348	321	0.638424	0.517144	0.666078	0.331178	0.638424	0.517144	0.666078	0.331178	0.625127	0.759639	0.863001	-0.212567	-0.301771	0.480231	translational_only	0.267758	0.999545	-1	2	-1	2	734	9	191	0.547684
uc007mhn.2	Kctd2	ENSMUST00000103035	9.20538	20	10.8398	14	1.69864	4	2.2861	4	15.7684	156	13.6503	137	8.21858	112	7.3786	80	0.583788	0.79411			0.583788	0.79411	0.206683	0.309829	0.198788	0.530179	0.374855	-1.4156	-0.81712	0.000563188	both	NA	NA	-1	2	-1	-1	1766	42	932	0.519253
uc007mhu.1	Nt5c	ENSMUST00000021082	49.3663	81	26.7145	26	39.2938	70	28.7334	38	107.114	792	103.456	774	75.7377	768	91.5835	747	0.460877	0.258221	0.518814	0.31374	0.460877	0.258221	0.518814	0.31374	0.894145	0.794612	1.15778	0.211356	-0.236518	0.621348	translational_only	0.987069	0.999713	1	2	-1	2	804	28	173	0.573383
uc007mhv.1	Hn1	ENSMUST00000021083	14.3185	16	8.56889	6	5.72173	7	12.9434	12	47.5504	133	55.4448	162	46.2843	173	47.921	143	0.301122	0.154548	0.123621	0.270098	0.301122	0.154548	0.123621	0.270098	0.815521	0.914657	0.864046	-0.21082	-0.101009	1	translational_only	NA	NA	-1	2	-1	2	1358	95	798	0.543446
uc007mhx.2	Nup85	ENSMUST00000021085	60.5459	334	41.3284	135	51.5132	308	46.2643	205	80.8322	2039	80.9407	2068	84.7652	2947	66.5421	1841	0.749033	0.510601	0.607716	0.695263	0.749033	0.510601	0.607716	0.695263	0.959785	0.935308	1.03441	0.048809	-0.000724758	1	translational_only	0.704509	0.999545	-1	2	-1	2	2159	86	102	0.515516
uc007mhy.2	Gga3	ENSMUST00000019135	7.96216	48	9.23143	33	7.98456	52	8.08047	39	7.72246	209	6.15972	169	5.60759	210	7.15096	214	1.03104	1.49868	1.42388	1.12998	1.03104	1.49868	1.42388	1.12998	0.934362	0.919059	1.00955	0.0137086	-0.0236889	1	translational_only	0.793328	0.999545	-1	2	-1	2	3681	49	1475	0.538984
uc007mia.1	Mrps7	ENSMUST00000058109	43.9362	88	25.2952	30	52.5138	114	37.916	61	89.6591	822	80.1005	742	94.4619	1191	91.6746	921	0.490036	0.315793	0.555926	0.413594	0.490036	0.315793	0.555926	0.413594	1.3062	1.09647	1.20313	0.266797	0.227129	0.592116	translational_only	0.886616	0.999545	1	2	1	2	1324	10	585	0.453927
uc007mib.1	Mif4gd	ENSMUST00000106507	6.00055	11	2.76373	3	7.0462	14	8.82866	13	13.9433	117	14.3693	122	8.46946	98	11.5117	106	0.430352				0.430352	0.192336	0.831954	0.766929	1.81131	0.705733	2.56771	1.36048	-0.417152	0.279269	translational_only	NA	NA	-1	2	-1	2	1655	519	467	0.522659
uc007mig.2	Slc25a19	ENSMUST00000178003	6.79782	18	1.27557	2	3.48439	10	6.11215	13	9.73559	118	10.1926	125	8.30372	139	8.12001	108	0.698245		0.419617		0.698245	0.125146	0.419617	0.752727	1.18866	0.824146	1.4238	0.509746	-0.180214	1	translational_only	NA	NA	-1	2	-1	2	2454	269	1228	0.557865
uc007mil.1	Tmem94	ENSMUST00000093912	10.0101	115	8.67085	59	11.0855	138	14.6294	135	8.85124	465	9.02776	480	8.35839	606	10.8988	628	1.13093	0.960465	1.32627	1.3423	1.13093	0.960465	1.32627	1.3423	1.37653	1.07708	1.27598	0.351605	0.200969	0.942797	translational_only	0.409819	0.999545	1	2	1	2	4996	227	686	0.585669
uc007mip.1	Caskin2	ENSMUST00000041684	8.77554	89	6.82722	41	6.73201	74	8.71557	71	7.4532	346	7.08934	333	5.2577	337	6.46006	329	1.17742	0.963026	1.28041	1.34915	1.17742	0.963026	1.28041	1.34915	0.990054	0.805757	1.22851	0.296908	-0.218157	0.843397	translational_only	0.532417	0.999545	1	2	-1	2	4722	481	635	0.610335
uc007mir.1	Tsen54	ENSMUST00000021134	7.71904	34	6.51793	17	7.54078	36	5.9355	21	18.5994	375	20.4408	417	14.9684	416	17.4917	387	0.415016	0.318868	0.503779	0.339333	0.415016	0.318868	0.503779	0.339333	0.946569	0.831453	1.14883	0.200171	-0.172257	1	translational_only	0.938367	0.999545	-1	2	-1	2	1972	25	369	0.589249
uc007mit.1	Llgl2	ENSMUST00000103032	2.1927	19	1.94896	10	2.34249	22	2.58614	18	1.99436	79	2.1436	86	3.36335	184	3.66025	159			0.696475	0.706548	1.09945	0.909198	0.696475	0.706548	1.19001	1.69736	0.698491	-0.517687	0.856092	0.000167175	both	NA	NA	-1	2	1	1	3542	151	307	0.605308
uc007mix.2	Recql5	ENSMUST00000021097	3.13889	26	2.03882	10	2.4505	22	2.10418	14	3.58694	136	3.41469	131	3.55202	186	3.22064	134	0.875088	0.597073	0.689887	0.653343	0.875088	0.597073	0.689887	0.653343	0.879672	0.967299	0.912421	-0.132229	0.0529389	1	translational_only	NA	NA	-1	2	1	2	3986	574	463	0.543653
uc007mjd.1	Sap30bp	ENSMUST00000140991	42.5277	109	19.7671	30	22.6785	63	27.6868	57	26.5087	311	29.1473	346	42.6025	688	26.7497	344	1.60429	0.678178	0.532329	1.03503	1.60429	0.678178	0.532329	1.03503	0.808501	1.24609	0.686696	-0.542257	0.415516	0.284162	translational_only	0.0263939	0.726869	-1	-1	1	2	2086	17	1142	0.541227
uc007mjn.1	Galk1	ENSMUST00000021114	99.8188	327	72.6875	141	71.2548	253	60.8048	160	198.263	2973	211.288	3203	144.578	2989	159.846	2628	0.503466	0.344022	0.492847	0.380397	0.503466	0.344022	0.492847	0.380397	0.765535	0.74331	1.03039	0.043193	-0.331705	0.133906	translational_only	0.663606	0.999545	-1	2	-1	2	1506	41	286	0.605578
uc007mjv.1	Wbp2	ENSMUST00000074628	34.5442	73	22.779	29	40.2748	92	18.1414	31	20.4576	191	20.7672	197	17.7914	224	20.5662	211	1.68858	1.09687	2.26373	0.882097	1.68858	1.09687	2.26373	0.882097	1.01907	0.930449	1.12938	0.175529	-0.0285695	1	translational_only	0.787253	0.999545	1	2	-1	2	1795	39	970	0.558217
uc007mjy.2	Trim47	ENSMUST00000021120	50.3922	272	47.2441	151	60.8519	356	59.0457	256	66.8983	1652	67.4373	1685	59.6708	2034	67.8614	1837	0.753266	0.700564	1.01979	0.870092	0.753266	0.700564	1.01979	0.870092	1.228	0.949355	1.29993	0.378439	0.0208337	1	translational_only	0.459121	0.999545	1	2	1	2	2195	15	251	0.627335
uc007mkd.1	Mrpl38	ENSMUST00000106439	31.8769	101	29.7951	56	26.4515	91	29.443	75	53.3565	769	55.9287	820	45.9361	916	52.654	835	0.597433	0.532734	0.575833	0.559179	0.597433	0.532734	0.575833	0.559179	0.906319	0.902136	1.00429	0.00617168	-0.0527624	1	translational_only	0.595041	0.999545	-1	2	-1	2	1411	91	177	0.596031
uc007mke.1	Mrpl38	ENSMUST00000138457	19.8681	24	9.7407	7	13.6841	18	20.5642	20	22.2481	121	19.7076	110	15.3339	116	24.2896	146	0.893027		0.892413	0.846626	0.893027	0.494261	0.892413	0.846626	1.1567	0.944414	1.25355	0.326023	0.00453732	1	translational_only	NA	NA	-1	2	1	2	998	0	548	0.342685
uc007mkh.1	Fbf1	ENSMUST00000103031	10.0996	100	9.88975	58	6.70722	72	8.17048	65	11.1865	507	13.1748	604	8.0108	501	9.19664	457	0.902837	0.750657	0.837272	0.88842	0.902837	0.750657	0.837272	0.88842	0.744281	0.706342	1.04366	0.0616575	-0.406275	0.0939431	translational_only	0.789438	0.999545	-1	2	-1	2	5373	753	1098	0.554439
uc007mkn.2	Ten1	ENSMUST00000021130	25.0862	33	17.9732	14	24.5481	35	17.0352	18	29.063	175	34.9605	213	26.4483	219	29.9655	198	0.863164	0.514099	0.928155	0.568493	0.863164	0.514099	0.928155	0.568493	0.965719	0.88114	1.08668	0.11993	-0.090801	1	translational_only	0.956109	0.999545	-1	2	-1	2	902	175	241	0.474501
uc007mkq.1	Srp68	ENSMUST00000021133	68.5273	360	46.9343	146	42.7003	243	31.7898	134	50.4273	1210	47.526	1152	43.7352	1447	35.776	941	1.35893	0.987549	0.976337	0.888578	1.35893	0.987549	0.976337	0.888578	0.64515	0.811725	0.794771	-0.33139	-0.20307	0.81533	translational_only	0.136351	0.999545	-1	2	-1	2	2526	111	537	0.524149
uc007mkt.2	Exoc7	ENSMUST00000021147	28.4767	167	22.1738	77	17.4633	111	11.8882	56	25.4558	683	27.5025	747	18.2879	678	21.6455	637	1.11867	0.806248	0.954908	0.549221	1.11867	0.806248	0.954908	0.549221	0.579489	0.754054	0.781397	-0.355872	-0.31163	0.268262	translational_only	0.122345	0.999545	-1	2	-1	2	3344	65	1185	0.557715
uc007mky.2	Rnf157	ENSMUST00000100202	3.32323	19	4.42634	15	1.291	8	1.08875	5	4.45675	116	4.62789	122	2.02573	73	1.85469	53	0.745663	0.95645			0.745663	0.95645	0.6373	0.587026	0.307082	0.427142	0.719298	-0.475338	-1.12153	1.65501e-06	both	NA	NA	-1	2	-1	-1	4655	248	2361	0.531042
uc007mld.2	Prpsap1	ENSMUST00000106391	51.965	167	39.4124	75	52.2971	182	49.9733	129	70.5305	1022	69.2177	1023	76.0034	1521	86.7876	1380	0.736775	0.569397	0.688089	0.575811	0.736775	0.569397	0.688089	0.575811	1.11921	1.16489	0.967638	-0.0474614	0.31115	0.21129	translational_only	0.532833	0.999545	-1	2	1	2	1868	129	581	0.555139
uc007mll.2	Sphk1	ENSMUST00000141798	3.39298	11	1.04183	2	3.41506	12	7.29618	19	6.46908	96	6.26028	94	11.6227	238	13.4601	219			0.293828	0.542061	0.524492	0.166418	0.293828	0.542061	2.41527	1.97046	1.20984	0.274814	1.07027	4.98588e-07	both	NA	NA	-1	2	1	1	1537	81	289	0.540013
uc007mln.1	Ube2o	ENSMUST00000082152	16.7277	182	16.7635	108	18.4863	218	20.3675	178	11.0436	550	10.8351	546	10.1335	697	11.7533	642	1.5147	1.54714	1.82428	1.73291	1.5147	1.54714	1.82428	1.73291	1.16012	1.00037	1.16178	0.216342	0.0959761	1	translational_only	0.596052	0.999545	1	2	1	2	5192	34	1291	0.571071
uc007mls.3	Rhbdf2	ENSMUST00000103029	2.44081	17	2.66936	11	3.8416	29	4.46686	25	2.17401	69	2.40459	77	3.86968	169	4.34973	151			0.992744	1.02693	1.12272	1.11011	0.992744	1.02693	1.62587	1.79518	0.904533	-0.144755	0.933949	5.23137e-05	both	NA	NA	-1	2	1	1	3644	307	853	0.588913
uc007mmf.2	Mxra7	ENSMUST00000021170	36.9928	54	34.7073	30	29.0744	46	36.6729	43	43.0359	287	43.1901	292	31.9829	294	35.1184	257	0.859581	0.803595	0.909059	1.04426	0.859581	0.803595	0.909059	1.04426	0.916976	0.778203	1.17445	0.231991	-0.268991	0.490099	translational_only	0.803233	0.999545	1	2	-1	2	1725	48	1140	0.501449
uc007mmi.1	Jmjd6	ENSMUST00000047616	47.1909	159	28.5701	57	40.8016	149	34.3635	93	56.2813	868	51.7786	808	58.5088	1241	54.0515	914	0.838484	0.551775	0.697358	0.635755	0.838484	0.551775	0.697358	0.635755	0.992133	1.04165	0.958895	-0.0605548	0.15304	1	translational_only	0.530171	0.999545	-1	2	1	2	1668	256	200	0.556954
uc007mmn.2	Srsf2	ENSMUST00000092404	406.647	742	269.329	291	356.477	705	329.544	483	458.559	3830	459.476	3871	310.797	3574	375.871	3445	0.886793	0.586165	1.14698	0.87675	0.886793	0.586165	1.14698	0.87675	1.01486	0.747976	1.37392	0.458297	-0.321724	0.198508	translational_only	0.273491	0.999545	1	2	-1	2	1903	165	1072	0.499737
uc007mms.1	Mfsd11	ENSMUST00000021173	14.0969	53	9.88205	22	13.2517	54	14.2387	43	16.6312	286	17.5731	306	11.1495	265	16.3093	308	0.847618	0.562341	1.18855	0.873043	0.847618	0.562341	1.18855	0.873043	1.14644	0.802787	1.46216	0.548104	-0.224506	1	translational_only	0.19775	0.999545	1	2	-1	2	3120	78	1692	0.352885
uc007mnb.2	Sec14l1	ENSMUST00000021177	59.9886	363	48.8401	175	52.603	345	54.5207	265	34.6354	958	32.5922	913	28.3634	1084	35.2197	1069	1.732	1.49852	1.85461	1.54802	1.732	1.49852	1.85461	1.54802	0.984333	0.945788	1.05327	0.0748801	0.0151045	1	translational_only	0.996931	0.999801	1	2	1	2	2869	210	499	0.535727
uc007mnd.2	42622	ENSMUST00000093907	54.2409	265	37.9574	110	37.8924	201	39.2423	154	33.1091	737	32.7854	741	21.4138	661	25.2382	619	1.63825	1.15775	1.76953	1.55488	1.63825	1.15775	1.76953	1.55488	0.836618	0.707981	1.18899	0.249733	-0.399107	0.0766248	translational_only	0.506604	0.999545	1	2	-1	2	3616	94	1770	0.566372
uc007mni.2	Tnrc6c	ENSMUST00000026658	12.7534	205	13.448	128	8.72458	152	8.44213	109	7.29125	536	7.41723	552	5.21657	530	4.61059	372	1.74914	1.81308	1.67247	1.83103	1.74914	1.81308	1.67247	1.83103	0.655183	0.668129	0.983518	-0.0239762	-0.481731	0.0185442	both	0.670493	0.999545	-1	2	-1	-1	8728	435	2590	0.507333
uc007mno.2	Tmc6	ENSMUST00000026659	6.88801	47	6.43495	26	6.62554	49	5.83847	32	9.89731	309	9.77759	309	7.95483	343	7.76092	266	0.695948	0.658133	0.832895	0.752291	0.695948	0.658133	0.832895	0.752291	0.935528	0.798771	1.17067	0.227339	-0.225875	0.684067	translational_only	0.843527	0.999545	1	2	-1	2	2912	221	258	0.563187
uc007mnx.2	Syngr2	ENSMUST00000026649	150.259	278	116.837	128	150.104	301	138.617	206	137.235	1148	142.648	1213	98.0689	1133	114.057	1047	1.0949	0.819058	1.53059	1.21533	1.0949	0.819058	1.53059	1.21533	1.08096	0.757909	1.43468	0.520729	-0.306691	0.238991	translational_only	0.136598	0.999545	1	2	-1	2	1524	38	811	0.568898
uc007mod.1	Birc5	ENSMUST00000081387	236.578	257	146.257	98	172.268	206	141.492	127	180.342	794	195.744	872	175.419	1029	143.361	713	1.31183	0.747183	0.98204	0.986968	1.31183	0.747183	0.98204	0.986968	0.819571	0.847623	0.956287	-0.0644842	-0.148306	1	translational_only	0.651502	0.999545	-1	2	-1	2	972	114	435	0.51749
uc007moj.1	Pgs1	ENSMUST00000132676	26.7108	124	22.1907	61	24.4455	123	21.1858	79	50.8082	1079	49.9496	1072	41.6981	1223	44.2139	1031	0.525718	0.444262	0.586249	0.479166	0.525718	0.444262	0.586249	0.479166	0.933128	0.852659	1.09839	0.135389	-0.131566	1	translational_only	0.849535	0.999545	-1	2	-1	2	2298	23	613	0.576153
uc007mow.1	Timp2	ENSMUST00000017610	843.523	1532	715.987	770	759.466	1495	662.854	967	933.384	7675	946.872	7940	638.305	7226	752.123	6808	0.903725	0.75616	1.18982	0.881311	0.903725	0.75616	1.18982	0.881311	0.91203	0.739488	1.24775	0.319333	-0.343418	0.13008	translational_only	0.511941	0.999545	1	2	-1	2	3622	321	2638	0.530922
uc007mox.2	BC100451	ENSMUST00000103024	2.45943	11	2.26552	6	8.25145	40	7.51551	27	2.1492	44	2.41373	50	7.0381	199	6.09814	137			1.1724	1.23243	1.14435	0.938599	1.1724	1.23243	3.33696	2.8789	1.15453	0.207307	1.62513	4.27993e-12	both	NA	NA	-1	2	1	1	1978	321	55	0.517695
uc007moz.1	Lgals3bp	ENSMUST00000043722	12.794	62	14.2881	41	5.52132	29	6.16567	24	17.4669	387	16.7623	376	4.60252	141	5.34066	130	0.732471	0.852395	1.19963	1.15448	0.732471	0.852395	1.19963	1.15448	0.431538	0.290487	1.48537	0.570819	-1.68897	1.40694e-19	both	NA	NA	-1	2	-1	-1	2168	168	266	0.560424
uc007mpu.1	Cbx8	ENSMUST00000026663	5.29568	16	7.82539	14	3.35911	11	3.7085	9	7.15846	99	8.71845	122	6.54444	125	6.91874	105		0.897567	0.513276		0.739779	0.897567	0.513276	0.536008	0.538645	0.847972	0.640844	-0.641955	-0.142153	1	translational_only	NA	NA	-1	2	-1	2	1393	63	241	0.562814
uc007mpw.2	Cbx4	ENSMUST00000026665	15.3502	71	9.49884	26	10.1731	51	9.42056	35	13.0993	277	13.2186	283	7.73849	226	9.20168	213	1.17183	0.718597	1.31461	1.02379	1.17183	0.718597	1.31461	1.02379	0.788509	0.643674	1.23697	0.306811	-0.5445	0.0140247	both	0.478134	0.999545	1	2	-1	-1	5197	220	3321	0.542621
uc007mqg.3	Gaa	ENSMUST00000106259	41.1841	331	37.4023	178	41.0974	358	46.3155	299	45.519	1674	49.5114	1843	48.4564	2462	53.1209	2143	0.904767	0.755428	0.848132	0.871888	0.904767	0.755428	0.848132	0.871888	1.11232	1.06889	1.03603	0.0510721	0.193316	0.762848	translational_only	0.75509	0.999545	-1	2	1	2	3430	174	394	0.591837
uc007mql.1	Sgsh	ENSMUST00000005173	14.7286	62	12.838	32	5.91784	27	3.84474	13	6.95437	134	7.79635	152	3.08345	82	2.74305	58	2.11789	1.64666			2.11789	1.64666	1.91923	1.40163	0.354145	0.394998	0.882137	-0.180925	-1.23539	4.17711e-08	both	NA	NA	-1	2	-1	-1	4324	26	2789	0.549491
uc007mqm.1	Slc26a11	ENSMUST00000050880	3.41242	17	1.69496	5	2.22241	12	2.74891	11	4.47298	102	5.76425	133	3.5265	111	3.15701	79		0.294047			0.762897	0.294047	0.630202	0.87073	0.973359	0.652864	1.42007	0.505959	-0.512679	0.0995116	translational_only	NA	NA	-1	2	-1	2	2692	122	788	0.533061
uc007mqt.2	Endov	ENSMUST00000106244	6.38832	18	4.79491	8	6.87642	21	6.62763	15	11.6302	150	9.96173	130	7.29824	130	7.92143	112	0.549286	0.481333	0.942202		0.549286	0.481333	0.942202	0.836671	1.20753	0.704877	1.72602	0.787453	-0.410366	0.201201	translational_only	NA	NA	-1	2	-1	2	5112	57	4038	0.508607
uc007mqz.2	Rptor	ENSMUST00000026671	13.6536	154	9.58259	64	13.6607	167	13.466	122	10.5782	546	10.1674	531	9.58114	683	10.8728	616	1.29073	0.942487	1.42579	1.2385	1.29073	0.942487	1.42579	1.2385	1.16743	0.985946	1.19303	0.254627	0.0757451	1	translational_only	0.573704	0.999545	1	2	1	2	7022	905	2109	0.566932
uc007mrd.2	Chmp6	ENSMUST00000026434	28.477	46	25.0475	24	14.7986	26	16.7793	22	51.3222	319	46.693	301	23.6609	212	30.8316	223	0.554868	0.536429	0.625445	0.544224	0.554868	0.536429	0.625445	0.544224	0.58997	0.55596	1.07181	0.100056	-0.697895	0.00198601	both	0.790755	0.999545	-1	2	-1	-1	1561	65	893	0.567585
uc007mrj.2	Baiap2	ENSMUST00000026436	38.3111	172	30.469	81	17.6735	86	15.8061	57	45.8871	943	48.2845	1004	20.4355	580	24.8325	560	0.834899	0.63103	0.864846	0.636509	0.834899	0.63103	0.864846	0.636509	0.486764	0.480696	1.02417	0.0344499	-0.961239	6.78064e-08	both	0.753733	0.999545	-1	2	-1	-1	2065	103	354	0.578692
uc007mrp.2	Cep131	ENSMUST00000106227	5.03542	45	2.8346	15	2.37454	23	2.78617	20	3.47242	142	3.09251	128	2.69047	152	1.78217	80	1.45012	0.9166	0.882577		1.45012	0.9166	0.882577	1.56336	0.655743	0.681293	1.03347	0.0474954	-0.443377	0.257264	translational_only	NA	NA	-1	2	-1	2	3578	193	205	0.61431
uc007mrq.1	Enthd2	ENSMUST00000093901	5.19528	25	3.5095	10	2.68427	14	3.88073	15	8.31301	183	8.03155	179	5.32531	162	6.04028	146	0.624958	0.436964	0.504059	0.642475	0.624958	0.436964	0.504059	0.642475	0.754183	0.695375	1.07968	0.110601	-0.430022	0.110179	translational_only	NA	NA	-1	2	-1	2	2779	58	999	0.587262
uc007mru.2	1810043H04Rik	ENSMUST00000106223	17.3278	10	8.77891	3	15.9872	10	12.9434	6	63.2182	167	61.357	164	44.9519	164	41.7411	121	0.274095	0.143079	0.355651		0.274095	0.143079	0.355651	0.310087	1.10817	0.695908	1.59583	0.674307	-0.42231	0.124769	translational_only	NA	NA	-1	2	-1	2	494	48	221	0.589069
uc007mrv.2	Slc38a10	ENSMUST00000103018	41.9575	386	45.3415	247	39.9149	398	46.4163	343	57.318	2410	60.0799	2556	43.8291	2542	47.1684	2177	0.732014	0.754686	0.910694	0.984054	0.732014	0.754686	0.910694	0.984054	0.988913	0.77512	1.27447	0.349892	-0.270689	0.303728	translational_only	0.541597	0.999545	1	2	-1	2	4592	273	1046	0.575784
uc007msm.2	Faap100	ENSMUST00000026448	10.7976	80	9.3454	41	7.5962	61	7.56142	45	10.7035	363	12.4144	426	6.89606	323	8.03423	299	1.00879	0.752788	1.10153	0.941151	1.00879	0.752788	1.10153	0.941151	0.752501	0.645832	1.15957	0.213594	-0.535517	0.0153237	both	0.75628	0.999545	1	2	-1	-1	3175	40	495	0.607559
uc007msq.2	Nploc4	ENSMUST00000044271	55.9785	286	36.0295	109	47.3136	262	50.9278	209	30.7017	718	29.1174	689	27.3228	882	30.9394	794	1.8233	1.23739	1.73165	1.64605	1.8233	1.23739	1.73165	1.64605	1.06775	0.973973	1.10358	0.142185	0.0578009	1	translational_only	0.763405	0.999545	1	2	1	2	4685	187	2671	0.497759
uc007msw.1	Arl16	ENSMUST00000143233	10.5834	15	4.76619	4	9.76463	15	7.02714	8	19.5759	127	15.234	100	14.8439	133	15.0299	107	0.540636		0.657821		0.540636	0.312866	0.657821	0.467546	1.09395	0.858197	1.31853	0.398929	-0.123365	1	translational_only	NA	NA	-1	2	-1	2	2023	177	1324	0.316362
uc007msz.2	Hgs	ENSMUST00000026900	35.0426	229	33.5955	130	27.39	194	27.6237	145	29.344	877	28.117	851	23.2962	962	24.4936	804	1.1942	1.19485	1.17573	1.12779	1.1942	1.19485	1.17573	1.12779	0.801504	0.831691	0.964201	-0.0525939	-0.168553	0.972993	translational_only	0.561903	0.999545	-1	2	-1	2	2908	92	485	0.581499
uc007mta.1	Mrpl12	ENSMUST00000043627	15.5534	22	7.79619	7	8.95283	14	10.2542	12	112.36	307	102.522	270	106.145	336	107.836	308	0.138425	0.0760439	0.0843452	0.0950905	0.138425	0.0760439	0.0843452	0.0950905	0.822583	0.995805	0.836652	-0.2573	-0.0365714	1	translational_only	0.356687	0.999545	-1	2	-1	2	949	23	320	0.580611
uc007mtb.2	Slc25a10	ENSMUST00000026899	35.2229	84	24.7851	35	30.9503	80	31.8441	61	40.7651	445	35.5808	393	24.4756	369	29.2179	350	0.864045	0.696585	1.26454	1.08988	0.864045	0.696585	1.26454	1.08988	1.04643	0.703292	1.50863	0.593243	-0.413408	0.103619	translational_only	0.132505	0.999545	1	2	-1	2	4000	150	2986	0.52925
uc007mtf.1	Fam195b	ENSMUST00000034913	53.0878	41	43.7338	20	11.9465	10	17.732	11	89.6711	317	81.0748	290	28.6747	140	32.5995	126	0.592027	0.539424	0.41662	0.543934	0.592027	0.539424	0.41662	0.543934	0.306527	0.358862	0.848957	-0.236237	-1.38741	9.6009e-13	both	NA	NA	-1	2	-1	-1	1205	115	796	0.568465
uc007mti.1	P4hb	ENSMUST00000026122	616.124	2611	419.661	1058	637.068	2932	507.418	1733	432.958	8320	476	9274	625.83	16464	409.484	8635	1.42306	0.881641	1.01796	1.23916	1.42306	0.881641	1.01796	1.23916	1.10495	1.13901	0.979355	-0.0300957	0.277128	0.646377	translational_only	0.651153	0.999545	-1	2	1	2	2538	129	879	0.522065
uc007mtk.2	Arhgdia	ENSMUST00000106197	452.116	573	278.967	243	381.786	542	254.306	282	567.295	2314	526.305	2317	390.702	2208	432.807	2048	0.796968	0.530048	0.97718	0.587572	0.796968	0.530048	0.97718	0.587572	0.870069	0.753026	1.17915	0.237749	-0.31313	0.205077	translational_only	0.685647	0.999545	1	2	-1	2	2732	121	1996	0.561493
uc007mtl.1	Alyref	ENSMUST00000026125	65.8178	116	36.6558	42	65.4355	126	43.9409	66	51.6999	318	42.3666	272	49.6612	397	55.1827	356	1.27307	0.865205	1.31764	0.796281	1.27307	0.865205	1.31764	0.796281	1.06736	1.11457	0.988608	-0.0165302	0.155478	1	translational_only	0.965669	0.999713	-1	2	1	2	1132	27	337	0.458481
uc007mtm.2	Anapc11	ENSMUST00000026128	185.807	123	125.006	49	68.294	49	86.5104	46	378.533	1147	345.081	1058	181.906	758	199.993	665	0.490861	0.362251	0.375435	0.432568	0.490861	0.362251	0.375435	0.432568	0.498063	0.527767	0.947124	-0.0783746	-0.828658	1.78822e-06	both	0.440858	0.999545	-1	2	-1	-1	3229	202	2772	0.430164
uc007mtp.1	Pcyt2	ENSMUST00000026129	16.875	57	16.999	34	12.2917	45	11.4257	31	45.3388	701	41.8046	654	22.2914	476	24.7545	420	0.372198	0.40663	0.551409	0.461562	0.372198	0.40663	0.551409	0.461562	0.700164	0.539867	1.30063	0.379216	-0.793447	1.02532e-05	both	0.645222	0.999545	1	2	-1	-1	1835	38	582	0.585831
uc007mtu.2	Mafg	ENSMUST00000058162	24.2738	32	29.3381	23	27.5312	39	16.9622	18	12.2202	72	14.4979	87	17.0445	139	17.6317	115			1.61525	0.962029	1.98637	2.02361	1.61525	0.962029	0.829917	1.29786	0.642717	-0.637744	0.474466	0.118169	translational_only	NA	NA	-1	2	1	2	1636	214	933	0.459658
uc007mtv.1	Pycr1	ENSMUST00000170556	31.491	80	21.7438	33	10.1353	28	10.7216	22	24.5994	280	26.5431	305	9.91233	156	10.3934	131	1.28015	0.819189	1.02249	1.03158	1.28015	0.819189	1.02249	1.03158	0.391791	0.397042	0.978438	-0.0314473	-1.22682	9.44428e-11	both	NA	NA	-1	2	-1	-1	2914	445	1539	0.429307
uc007mtz.2	Notum	ENSMUST00000106178	1.1854	5	2.40228	6	12.6868	58	10.3304	35	1.24305	24	1.63803	32	13.8849	369	16.2473	344			0.913716	0.635823	0.953621	1.46656	0.913716	0.635823	6.41563	10.4586	0.640257	-0.643277	3.47281	2.10309e-48	both	NA	NA	-1	2	1	1	2019	76	431	0.558692
uc007mua.2	Aspscr1	ENSMUST00000026135	26.8581	124	17.192	47	23.5811	118	16.7185	62	33.848	714	34.8112	743	31.627	918	37.5873	869	0.79349	0.493865	0.7456	0.444792	0.79349	0.493865	0.7456	0.444792	0.914859	1.00809	0.92468	-0.112974	0.104373	1	translational_only	0.431265	0.999545	-1	2	1	2	1838	96	89	0.586507
uc007muc.1	Stra13	ENSMUST00000055424	58.9145	36	30.401	11	33.2178	22	26.486	13	91.883	257	77.3822	219	61.0931	236	73.9573	227	0.64119	0.392868	0.543725	0.358126	0.64119	0.392868	0.543725	0.358126	0.66846	0.797862	0.872146	-0.197358	-0.232672	0.863119	translational_only	0.333409	0.999545	-1	2	-1	2	636	48	351	0.550314
uc007mue.2	Lrrc45	ENSMUST00000026139	6.74322	38	8.69077	29	4.25683	26	4.63934	21	11.7465	303	9.73184	254	8.70174	310	8.55368	242	0.574061	0.893024	0.489193	0.54238	0.574061	0.893024	0.489193	0.54238	0.576401	0.803386	0.703145	-0.508107	-0.218471	0.845595	translational_only	0.0673068	0.929969	-1	2	-1	2	2463	137	313	0.587495
uc007mui.1	Dcxr	ENSMUST00000026144	16.3376	33	16.7217	20	6.39487	14	5.54716	9	28.2688	261	33.3374	311	8.2229	105	8.79668	89	0.577939	0.501591			0.577939	0.501591	0.777691	0.630597	0.36123	0.276264	1.30454	0.383539	-1.75808	1.97188e-18	both	NA	NA	-1	2	-1	-1	918	52	131	0.600218
uc007muj.2	Cbr2	ENSMUST00000026148	83.2045	157	56.3659	66	17.2142	37	16.3456	26	130.688	880	124.564	865	25.6812	282	33.9813	296	0.636666	0.452507	0.670303	0.481019	0.636666	0.452507	0.670303	0.481019	0.240451	0.23374	1.05706	0.0800579	-1.77942	6.71449e-22	both	0.517582	0.999545	-1	2	-1	-1	1021	49	237	0.556317
uc007mum.1	Rfng	ENSMUST00000026156	14.1395	39	8.54552	14	14.049	42	15.3305	34	14.854	186	15.0116	190	12.2911	213	15.8486	218	0.951899	0.569261	1.14303	0.96731	0.951899	0.569261	1.14303	0.96731	1.29511	0.94221	1.38732	0.472303	0.00861247	1	translational_only	0.286508	0.999545	1	2	1	2	2118	42	1077	0.55949
uc007mus.1	Dus1l	ENSMUST00000167023	15.5765	62	11.4556	27	18.7756	81	14.3877	46	22.8651	416	22.9997	424	26.9814	677	21.157	423	0.681236	0.498077	0.69587	0.680041	0.681236	0.498077	0.69587	0.680041	1.22681	1.04957	1.16671	0.22244	0.168972	1	translational_only	0.910696	0.999545	1	2	1	2	1909	263	218	0.565217
uc007mut.1	Fasn	ENSMUST00000055655	83.018	1760	80.6947	1013	95.3958	2192	91.0803	1551	48.5321	4709	48.0796	4719	48.4896	6497	54.6963	5823	1.71058	1.67836	1.96734	1.6652	1.71058	1.67836	1.96734	1.6652	1.13904	1.06805	1.07188	0.100148	0.192229	0.753567	translational_only	0.902766	0.999545	1	2	1	2	9938	527	1896	0.573355
uc007mvb.1	Csnk1d	ENSMUST00000018274	88.5168	305	88.1492	180	73.3678	274	71.0613	197	54.8771	830	53.7977	824	41.6966	868	45.0174	751	1.613	1.63853	1.75956	1.57853	1.613	1.63853	1.75956	1.57853	0.817526	0.797922	1.02662	0.0379037	-0.228127	0.563862	translational_only	0.885548	0.999545	-1	2	-1	2	3686	323	2115	0.535811
uc007mvk.1	Ogfod3	ENSMUST00000026169	5.71985	15	5.15181	8	5.98097	17	9.01987	19	6.74779	81	8.31558	101	10.5068	174	8.73025	115			0.569245	1.03317	0.847663	0.619537	0.569245	1.03317	1.37981	1.27708	1.09216	0.127186	0.455068	0.170137	translational_only	NA	NA	-1	2	1	2	1243	86	209	0.549477
uc007mvl.2	Hexdc	ENSMUST00000038831	3.43906	14	0.829119	2	2.4948	11	1.83492	6	5.61241	104	5.23413	98	5.74396	147	6.10231	124			0.434335	0.300692	0.612761	0.158406	0.434335	0.300692	1.01442	1.09217	0.953136	-0.0692455	0.222891	0.948568	translational_only	NA	NA	-1	2	1	2	2160	463	236	0.563889
uc007mvq.2	Narf	ENSMUST00000103015	9.56068	37	8.29119	19	7.62897	32	5.79046	18	8.35471	148	7.30863	131	5.23188	128	4.26973	83	1.14435	1.13444	1.45817		1.14435	1.13444	1.45817	1.35616	0.75171	0.606615	1.23502	0.304529	-0.615085	0.0192624	both	NA	NA	-1	2	-1	-1	4412	89	2934	0.449229
uc007mvt.2	Wdr45b	ENSMUST00000026173	9.90056	27	4.75197	8	6.98156	21	3.98859	9	12.5503	124	11.9624	121	7.29019	100	9.0429	101	0.788873	0.397241			0.788873	0.397241	0.957666	0.441075	0.748687	0.666311	1.17926	0.237886	-0.478275	0.12751	translational_only	NA	NA	-1	2	-1	2	2344	154	1155	0.495307
uc007mvy.2	Tbcd	ENSMUST00000103013	22.5756	228	17.3906	104	14.0687	154	14.1761	115	21.1242	976	20.6207	964	17.7557	1133	15.7152	797	1.06871	0.843357	0.792348	0.90206	1.06871	0.843357	0.792348	0.90206	0.706717	0.801798	0.886167	-0.17435	-0.219894	0.631442	translational_only	0.299549	0.999545	-1	2	-1	2	3912	96	225	0.532209
uc007mwd.1	Metrnl	ENSMUST00000036742	70.7747	183	52.904	81	90.3758	253	83.3877	173	126.438	1467	129.986	1526	140.552	2212	160.273	2011	0.559758	0.406997	0.643007	0.520286	0.559758	0.406997	0.643007	0.520286	1.40496	1.17315	1.2033	0.266992	0.304054	0.223418	translational_only	0.786819	0.999545	1	2	1	2	2468	199	1333	0.424635
uc007mwl.2	Rab10	ENSMUST00000021001	133.802	215	89.2853	86	119.375	209	81.6951	106	102.874	742	94.9606	698	70.045	699	76.2483	610	1.30064	0.940236	1.70426	1.07144	1.30064	0.940236	1.70426	1.07144	0.901305	0.739474	1.23866	0.308783	-0.334766	0.172263	translational_only	0.444973	0.999545	1	2	-1	2	3513	551	2359	0.444634
[truncated: 5,890 more rows]

## Sheet: UTR lengt & miRNA binding sites
Transcript_ID	Gene_symbol	Conserved_sites	Non-conserved_sites	Total_sites	3_UTR_length	sites_per_100_bp	conserved_per_100_bp	non-conserved_per_100_bp	babel
[truncated: 7,001 more rows]
