# Supplementary material for: Translational control of ERK signaling through miRNA/4EHP-directed silencing
Source: eLife. 2018 Feb 7;7:e35034. doi: 10.7554/eLife.35034 (PMC5819943; doi:10.7554/eLife.35034)
Supplement: Supplementary file 3. [file elife-35034-supp3.xlsx]

## Sheet: Sheet1
Name	Sequence	Application
Renilla - Fwd	ATGGCTTCCAAGGTGTAC	RT-PCR
Renilla - Rev	TAGTTGATGAAGGAGTCCA	RT-PCR
Firefly - Fwd	GAGCACGGAAAGACGATGACGG	RT-PCR
Firefly - Rev	GGCCTTTATGAGGATCTCTCTG	RT-PCR
mGapdh - Fwd	AGGTCGGTGTGAACGGATTTG	RIP/RT-PCR
mGapdh - Rev	TGTAGACCATGTAGTTGAGGTCA	RIP/RT-PCR
mActinB - Fwd	GGCTGTATTCCCCTCCATCG	RIP/RT-PCR
mActinB-Rev	CCAGTTGGTAACAATGCCATGT	RIP/RT-PCR
mSlc35e1-Fwd	CAGTGACCTGGCCTATGTGTC	RIP/RT-PCR
mSlc35e1-Rev	GCTGATGAGGTTGAGAATGCTG	RIP/RT-PCR
mTmed7-Fwd	ATGGGACGTACAAGTTTTGCTT	RIP/RT-PCR
mTmed7-Rev	GGCACTGACTCGGTTCTCAC	RIP/RT-PCR
mKlhl21-Fwd	TTCCCCGATCACTTAGGTGGG	RIP/RT-PCR
mKlhl21-Rev	CACACGCAGTCATAGAGCCG	RIP/RT-PCR
mIQGAP1-Fwd	GAGAAGACCGTGTTGGAGCTA	RIP/RT-PCR
mIQGAP1-Rev	GGGTGAGGCTATGCTCAGG	RIP/RT-PCR
mLYAR-Fwd	ATGTGGTGAATCCGTGAAGAAAA	RIP/RT-PCR
mLYAR-Rev	TTGCCTCCGTACTTCTGACCT	RIP/RT-PCR
mDUSP6-Fwd	CGGATCACTGGAGCCAAAAC	RIP/RT-PCR
mDUSP6-Rev	ATACCTGCCAAGCAATGCAC	RIP/RT-PCR
mDUSP7-Fwd	TGAGCACGGTGGTGAGTTC	RIP/RT-PCR
mDUSP7-Rev	CTGTCACTGAACGGCTGATG	RIP/RT-PCR
28S rRNA-Fwd	GGTTGCCACTGGGGATCGAC3	RT-PCR
28S rRNA-Rev	TCTTCTGGACTGCGCATGAG	RT-PCR
hDUSP6-3-GSP	GATTACGCCAAGCTTCCACCCCTTCCAACCAGAATGTATACCAGG	RACE
attB1-hDUSP6-3´- Fwd	GGGGACAAGTTTGTACAAAAAAGCAGGCTCGAAGACCCCACACCCCTCCTTG	Cloning
attB2-hDUSP6-3´- Rev	GGGGACCACTTTGTACAAGAAAGCTGGGTTCAATAGCCAAAATAGTTATTTATTA	Cloning
Dusp6-Fragment1-Xho1- Fwd	GAGCTCGAGAAGACCCCACACCCCTCCT	Cloning
Dusp6-Fragment1-Not1- Rev	GAGGCGGCCGCACACATGGGTACAGAGCAA	Cloning
Dusp6-Fragment2-Xho1- Fwd	GAGCTCGAGGTACCCATGTGTACAGCC	Cloning
Dusp6-Fragment2-Not1- Rev	GAGGCGGCCGCTGGAGTATCAGATTTTTTTTTCC	Cloning
Dusp6-Fragment3-Xho1- Fwd	GAGCTCGAGTCTGATACTCCATTTGATT	Cloning
Dusp6-Fragment3-Not1- Rev	GAGGCGGCCGCGGATTAGAAAAGAGCACAA	Cloning
Dusp6-Fragment4-Xho1- Fwd	GAGCTCGAGCTTTTCTAATCCAAAGGGT	Cloning
Dusp6-Fragment4-Not1- Rev	GAGGCGGCCGCACACAAGCAAAAATATTTAC	Cloning
Dusp6-Fragment5-Xho1- Fwd	GAGCTCGAGTTTTGCTTGTGTTGTCGC	Cloning
Dusp6-Fragment5-Not1- Rev	GAGGCGGCCGCAAAGGAAAGAAACCAACCC	Cloning
Dusp6-Fragment6-Xho1- Fwd	GAGCTCGAGTTTCTTTCCTTTAAAAAAATTTG	Cloning
Dusp6-Fragment6-Not1- Rev	GAGGCGGCCGCCAATAGCCAAAATAGTTATT	Cloning
